# Supplementary material for: Genomic reconstruction of short-chain fatty acid production by the human gut microbiota
Source: Front Mol Biosci. 2022 Aug 11;9:949563. doi: 10.3389/fmolb.2022.949563 (PMC9403272; doi:10.3389/fmolb.2022.949563)
Supplement: Supplementary file 7 [file Table1.XLSX]

## Sheet: Taxonomy
Table S1. A. The reference set of 2,856 human gut bacterial genomes analyzed in this work.
Genome id	Genome name	Kingdom	Phylum	Class	Order	Family	Genus	Species
195.1023	Campylobacter coli strain YH501	Bacteria	Proteobacteria	Epsilonproteobacteria	Campylobacterales	Campylobacteraceae	Campylobacter	Campylobacter coli
195.363	Campylobacter coli strain BFR-CA-9557	Bacteria	Proteobacteria	Epsilonproteobacteria	Campylobacterales	Campylobacteraceae	Campylobacter	Campylobacter coli
195.462	Campylobacter coli strain n/a	Bacteria	Proteobacteria	Epsilonproteobacteria	Campylobacterales	Campylobacteraceae	Campylobacter	Campylobacter coli
195.899	Campylobacter coli strain n/a	Bacteria	Proteobacteria	Epsilonproteobacteria	Campylobacterales	Campylobacteraceae	Campylobacter	Campylobacter coli
197.15238	Campylobacter jejuni BEED08	Bacteria	Proteobacteria	Epsilonproteobacteria	Campylobacterales	Campylobacteraceae	Campylobacter	Campylobacter jejuni
197.5229	Campylobacter jejuni strain CJM1cam	Bacteria	Proteobacteria	Epsilonproteobacteria	Campylobacterales	Campylobacteraceae	Campylobacter	Campylobacter jejuni
197.5249	Campylobacter jejuni strain NCTC11351	Bacteria	Proteobacteria	Epsilonproteobacteria	Campylobacterales	Campylobacteraceae	Campylobacter	Campylobacter jejuni
199.248	Campylobacter concisus strain ATCC 33237	Bacteria	Proteobacteria	Epsilonproteobacteria	Campylobacterales	Campylobacteraceae	Campylobacter	Campylobacter concisus
199.830	Campylobacter concisus strain AAUH-12CDti2-a	Bacteria	Proteobacteria	Epsilonproteobacteria	Campylobacterales	Campylobacteraceae	Campylobacter	Campylobacter concisus
199.901	Campylobacter concisus strain P2CDO4	Bacteria	Proteobacteria	Epsilonproteobacteria	Campylobacterales	Campylobacteraceae	Campylobacter	Campylobacter concisus
199.994	Campylobacter concisus BEED07	Bacteria	Proteobacteria	Epsilonproteobacteria	Campylobacterales	Campylobacteraceae	Campylobacter	Campylobacter concisus
210.1380	Helicobacter pylori Hp238	Bacteria	Proteobacteria	Epsilonproteobacteria	Campylobacterales	Helicobacteraceae	Helicobacter	Helicobacter pylori
210.1381	Helicobacter pylori 26695-1MET	Bacteria	Proteobacteria	Epsilonproteobacteria	Campylobacterales	Helicobacteraceae	Helicobacter	Helicobacter pylori
210.1916	Helicobacter pylori strain BM013A	Bacteria	Proteobacteria	Epsilonproteobacteria	Campylobacterales	Helicobacteraceae	Helicobacter	Helicobacter pylori
287.1306	Pseudomonas aeruginosa F22031	Bacteria	Proteobacteria	Gammaproteobacteria	Pseudomonadales	Pseudomonadaceae	Pseudomonas	Pseudomonas aeruginosa
287.1307	Pseudomonas aeruginosa NCGM 1984	Bacteria	Proteobacteria	Gammaproteobacteria	Pseudomonadales	Pseudomonadaceae	Pseudomonas	Pseudomonas aeruginosa
292.26	Burkholderia cepacia strain LO6	Bacteria	Proteobacteria	Betaproteobacteria	Burkholderiales	Burkholderiaceae	Burkholderia	Burkholderia cepacia
294.123	Pseudomonas fluorescens strain UK4	Bacteria	Proteobacteria	Gammaproteobacteria	Pseudomonadales	Pseudomonadaceae	Pseudomonas	Pseudomonas fluorescens
303.167	Pseudomonas putida strain DLL-E4	Bacteria	Proteobacteria	Gammaproteobacteria	Pseudomonadales	Pseudomonadaceae	Pseudomonas	Pseudomonas putida
303.200	Pseudomonas putida strain PC2	Bacteria	Proteobacteria	Gammaproteobacteria	Pseudomonadales	Pseudomonadaceae	Pseudomonas	Pseudomonas putida
316.105	Pseudomonas stutzeri strain SLG510A3-8	Bacteria	Proteobacteria	Gammaproteobacteria	Pseudomonadales	Pseudomonadaceae	Pseudomonas	Pseudomonas stutzeri
316.77	Pseudomonas stutzeri strain 28a24	Bacteria	Proteobacteria	Gammaproteobacteria	Pseudomonadales	Pseudomonadaceae	Pseudomonas	Pseudomonas stutzeri
375.29	Bradyrhizobium japonicum E109	Bacteria	Proteobacteria	Alphaproteobacteria	Rhizobiales	Bradyrhizobiaceae	Bradyrhizobium	Bradyrhizobium japonicum
470.1288	Acinetobacter baumannii strain AC29	Bacteria	Proteobacteria	Gammaproteobacteria	Pseudomonadales	Moraxellaceae	Acinetobacter	Acinetobacter baumannii
470.1294	Acinetobacter baumannii strain AB31	Bacteria	Proteobacteria	Gammaproteobacteria	Pseudomonadales	Moraxellaceae	Acinetobacter	Acinetobacter baumannii
471.18	Acinetobacter calcoaceticus strain KCTC 2357	Bacteria	Proteobacteria	Gammaproteobacteria	Pseudomonadales	Moraxellaceae	Acinetobacter	Acinetobacter calcoaceticus
480.212	Moraxella catarrhalis strain 25240	Bacteria	Proteobacteria	Gammaproteobacteria	Pseudomonadales	Moraxellaceae	Moraxella	Moraxella catarrhalis
490.24	Neisseria sicca BEED21	Bacteria	Proteobacteria	Betaproteobacteria	Neisseriales	Neisseriaceae	Neisseria	Neisseria sicca
490.6	Neisseria sicca strain FDAARGOS_260	Bacteria	Proteobacteria	Betaproteobacteria	Neisseriales	Neisseriaceae	Neisseria	Neisseria sicca
490.7	Neisseria sicca strain UMB0321	Bacteria	Proteobacteria	Betaproteobacteria	Neisseriales	Neisseriaceae	Neisseria	Neisseria sicca
511.8	Alcaligenes faecalis strain ZD02	Bacteria	Proteobacteria	Betaproteobacteria	Burkholderiales	Alcaligenaceae	Alcaligenes	Alcaligenes faecalis
511.9	Alcaligenes faecalis strain NBIB-017	Bacteria	Proteobacteria	Betaproteobacteria	Burkholderiales	Alcaligenaceae	Alcaligenes	Alcaligenes faecalis
529.12	Ochrobactrum anthropi strain FRAF13	Bacteria	Proteobacteria	Alphaproteobacteria	Rhizobiales	Brucellaceae	Ochrobactrum	Ochrobactrum anthropi
545.12	Citrobacter koseri strain URMITE	Bacteria	Proteobacteria	Gammaproteobacteria	Enterobacterales	Enterobacteriaceae	Citrobacter	Citrobacter koseri
545.23	Citrobacter koseri strain FDAARGOS_164	Bacteria	Proteobacteria	Gammaproteobacteria	Enterobacterales	Enterobacteriaceae	Citrobacter	Citrobacter koseri
546.83	Citrobacter freundii strain FDAARGOS_73	Bacteria	Proteobacteria	Gammaproteobacteria	Enterobacterales	Enterobacteriaceae	Citrobacter	Citrobacter freundii
546.84	Citrobacter freundii strain FDAARGOS_61	Bacteria	Proteobacteria	Gammaproteobacteria	Enterobacterales	Enterobacteriaceae	Citrobacter	Citrobacter freundii
546.94	Citrobacter freundii strain P10159	Bacteria	Proteobacteria	Gammaproteobacteria	Enterobacterales	Enterobacteriaceae	Citrobacter	Citrobacter freundii
548.115	Enterobacter aerogenes strain CAV1320	Bacteria	Proteobacteria	Gammaproteobacteria	Enterobacterales	Enterobacteriaceae	Klebsiella	Klebsiella aerogenes
548.155	Enterobacter aerogenes strain G7	Bacteria	Proteobacteria	Gammaproteobacteria	Enterobacterales	Enterobacteriaceae	Klebsiella	Klebsiella aerogenes
549.15	Pantoea agglomerans MP2	Bacteria	Proteobacteria	Gammaproteobacteria	Enterobacterales	Erwiniaceae	Pantoea	Pantoea agglomerans
549.21	Pantoea agglomerans strain 190	Bacteria	Proteobacteria	Gammaproteobacteria	Enterobacterales	Erwiniaceae	Pantoea	Pantoea agglomerans
549.22	Pantoea agglomerans strain 4	Bacteria	Proteobacteria	Gammaproteobacteria	Enterobacterales	Erwiniaceae	Pantoea	Pantoea agglomerans
549.23	Pantoea agglomerans strain P10c	Bacteria	Proteobacteria	Gammaproteobacteria	Enterobacterales	Erwiniaceae	Pantoea	Pantoea agglomerans
549.25	Pantoea agglomerans strain 3	Bacteria	Proteobacteria	Gammaproteobacteria	Enterobacterales	Erwiniaceae	Pantoea	Pantoea agglomerans
550.150	Enterobacter cloacae GGT036	Bacteria	Proteobacteria	Gammaproteobacteria	Enterobacterales	Enterobacteriaceae	Enterobacter	Enterobacter cloacae complex
550.252	Enterobacter cloacae strain FDAARGOS_68	Bacteria	Proteobacteria	Gammaproteobacteria	Enterobacterales	Enterobacteriaceae	Enterobacter	Enterobacter cloacae complex
550.412	Enterobacter cloacae strain UW5	Bacteria	Proteobacteria	Gammaproteobacteria	Enterobacterales	Enterobacteriaceae	Enterobacter	Enterobacter cloacae complex
562.39593	Escherichia coli PS131_S11	Bacteria	Proteobacteria	Gammaproteobacteria	Enterobacterales	Enterobacteriaceae	Escherichia	Escherichia coli
562.39594	Escherichia coli BEED10	Bacteria	Proteobacteria	Gammaproteobacteria	Enterobacterales	Enterobacteriaceae	Escherichia	Escherichia coli
564.14	Escherichia fergusonii strain FDAARGOS_170	Bacteria	Proteobacteria	Gammaproteobacteria	Enterobacterales	Enterobacteriaceae	Escherichia	Escherichia fergusonii
569.31	Hafnia alvei strain FDAARGOS_158	Bacteria	Proteobacteria	Gammaproteobacteria	Enterobacterales	Hafniaceae	Hafnia	Hafnia alvei
569.38	Hafnia alvei strain HUMV-5920	Bacteria	Proteobacteria	Gammaproteobacteria	Enterobacterales	Hafniaceae	Hafnia	Hafnia alvei
571.108	Klebsiella oxytoca strain CAV1335	Bacteria	Proteobacteria	Gammaproteobacteria	Enterobacterales	Enterobacteriaceae	Klebsiella	Klebsiella oxytoca
571.110	Klebsiella oxytoca strain JKo3	Bacteria	Proteobacteria	Gammaproteobacteria	Enterobacterales	Enterobacteriaceae	Klebsiella	Klebsiella oxytoca
571.121	Klebsiella oxytoca strain ICU1-2b	Bacteria	Proteobacteria	Gammaproteobacteria	Enterobacterales	Enterobacteriaceae	Klebsiella	Klebsiella oxytoca
571.33	Klebsiella oxytoca strain M1	Bacteria	Proteobacteria	Gammaproteobacteria	Enterobacterales	Enterobacteriaceae	Klebsiella	Klebsiella oxytoca
571.57	Klebsiella oxytoca strain FDAARGOS_66	Bacteria	Proteobacteria	Gammaproteobacteria	Enterobacterales	Enterobacteriaceae	Klebsiella	Klebsiella oxytoca
571.62	Klebsiella oxytoca strain CAV1374	Bacteria	Proteobacteria	Gammaproteobacteria	Enterobacterales	Enterobacteriaceae	Klebsiella	Klebsiella oxytoca
571.63	Klebsiella oxytoca strain CAV1099	Bacteria	Proteobacteria	Gammaproteobacteria	Enterobacterales	Enterobacteriaceae	Klebsiella	Klebsiella oxytoca
571.66	Klebsiella oxytoca strain CHS143	Bacteria	Proteobacteria	Gammaproteobacteria	Enterobacterales	Enterobacteriaceae	Klebsiella	Klebsiella oxytoca
571.67	Klebsiella oxytoca strain CHS153	Bacteria	Proteobacteria	Gammaproteobacteria	Enterobacterales	Enterobacteriaceae	Klebsiella	Klebsiella oxytoca
571.68	Klebsiella oxytoca strain CHS222	Bacteria	Proteobacteria	Gammaproteobacteria	Enterobacterales	Enterobacteriaceae	Klebsiella	Klebsiella oxytoca
571.69	Klebsiella oxytoca strain MGH87	Bacteria	Proteobacteria	Gammaproteobacteria	Enterobacterales	Enterobacteriaceae	Klebsiella	Klebsiella oxytoca
571.70	Klebsiella oxytoca strain MGH88	Bacteria	Proteobacteria	Gammaproteobacteria	Enterobacterales	Enterobacteriaceae	Klebsiella	Klebsiella oxytoca
573.1493	Klebsiella pneumoniae strain yzusk-4	Bacteria	Proteobacteria	Gammaproteobacteria	Enterobacterales	Enterobacteriaceae	Klebsiella	Klebsiella pneumoniae
582.26	Morganella morganii strain FDAARGOS_63	Bacteria	Proteobacteria	Gammaproteobacteria	Enterobacterales	Morganellaceae	Morganella	Morganella morganii
582.34	Morganella morganii strain FDAARGOS_172	Bacteria	Proteobacteria	Gammaproteobacteria	Enterobacterales	Morganellaceae	Morganella	Morganella morganii
584.106	Proteus mirabilis strain CYPM1	Bacteria	Proteobacteria	Gammaproteobacteria	Enterobacterales	Morganellaceae	Proteus	Proteus mirabilis
584.140	Proteus mirabilis strain AOUC-001	Bacteria	Proteobacteria	Gammaproteobacteria	Enterobacterales	Morganellaceae	Proteus	Proteus mirabilis
585.10	Proteus vulgaris strain CSUR P1867	Bacteria	Proteobacteria	Gammaproteobacteria	Enterobacterales	Morganellaceae	Proteus	Proteus vulgaris
585.9	Proteus vulgaris strain ATCC 49132	Bacteria	Proteobacteria	Gammaproteobacteria	Enterobacterales	Morganellaceae	Proteus	Proteus vulgaris
588.10	Providencia stuartii strain FDAARGOS_87	Bacteria	Proteobacteria	Gammaproteobacteria	Enterobacterales	Morganellaceae	Providencia	Providencia stuartii
588.6	Providencia stuartii strain 33672	Bacteria	Proteobacteria	Gammaproteobacteria	Enterobacterales	Morganellaceae	Providencia	Providencia stuartii
614.9	Serratia liquefaciens strain FDAARGOS_125	Bacteria	Proteobacteria	Gammaproteobacteria	Enterobacterales	Yersiniaceae	Serratia	Serratia liquefaciens
615.1	Serratia marcescens Db11	Bacteria	Proteobacteria	Gammaproteobacteria	Enterobacterales	Yersiniaceae	Serratia	Serratia marcescens
615.109	Serratia marcescens strain UCI88	Bacteria	Proteobacteria	Gammaproteobacteria	Enterobacterales	Yersiniaceae	Serratia	Serratia marcescens
622.8	Shigella dysenteriae CDC 74-1112	Bacteria	Proteobacteria	Gammaproteobacteria	Enterobacterales	Enterobacteriaceae	Shigella	Shigella dysenteriae
623.158	Shigella flexneri strain NCTC1	Bacteria	Proteobacteria	Gammaproteobacteria	Enterobacterales	Enterobacteriaceae	Shigella	Shigella flexneri
624.634	Shigella sonnei strain FDAARGOS_128	Bacteria	Proteobacteria	Gammaproteobacteria	Enterobacterales	Enterobacteriaceae	Shigella	Shigella sonnei
624.68	Shigella sonnei strain FDAARGOS_71	Bacteria	Proteobacteria	Gammaproteobacteria	Enterobacterales	Enterobacteriaceae	Shigella	Shigella sonnei
630.128	Yersinia enterocolitica strain FORC-002	Bacteria	Proteobacteria	Gammaproteobacteria	Enterobacterales	Yersiniaceae	Yersinia	Yersinia enterocolitica
630.2	Yersinia enterocolitica 8081	Bacteria	Proteobacteria	Gammaproteobacteria	Enterobacterales	Yersiniaceae	Yersinia	Yersinia enterocolitica
630.33	Yersinia enterocolitica strain ATCC 9610	Bacteria	Proteobacteria	Gammaproteobacteria	Enterobacterales	Yersiniaceae	Yersinia	Yersinia enterocolitica
636.8	Edwardsiella tarda strain FL95-01	Bacteria	Proteobacteria	Gammaproteobacteria	Enterobacterales	Hafniaceae	Edwardsiella	Edwardsiella tarda
644.34	Aeromonas hydrophila strain RB-AH	Bacteria	Proteobacteria	Gammaproteobacteria	Aeromonadales	Aeromonadaceae	Aeromonas	Aeromonas hydrophila
644.37	Aeromonas hydrophila strain AH10	Bacteria	Proteobacteria	Gammaproteobacteria	Aeromonadales	Aeromonadaceae	Aeromonas	Aeromonas hydrophila
648.76	Aeromonas caviae strain FDAARGOS_75	Bacteria	Proteobacteria	Gammaproteobacteria	Aeromonadales	Aeromonadaceae	Aeromonas	Aeromonas caviae
648.77	Aeromonas caviae strain FDAARGOS_72	Bacteria	Proteobacteria	Gammaproteobacteria	Aeromonadales	Aeromonadaceae	Aeromonas	Aeromonas caviae
651.4	Aeromonas media strain ARB13	Bacteria	Proteobacteria	Gammaproteobacteria	Aeromonadales	Aeromonadaceae	Aeromonas	Aeromonas media
651.7	Aeromonas media strain CECT 4232	Bacteria	Proteobacteria	Gammaproteobacteria	Aeromonadales	Aeromonadaceae	Aeromonas	Aeromonas media
654.45	Aeromonas veronii strain TH0426	Bacteria	Proteobacteria	Gammaproteobacteria	Aeromonadales	Aeromonadaceae	Aeromonas	Aeromonas veronii
654.48	Aeromonas veronii strain AVNIH1	Bacteria	Proteobacteria	Gammaproteobacteria	Aeromonadales	Aeromonadaceae	Aeromonas	Aeromonas veronii
654.49	Aeromonas veronii strain CB51	Bacteria	Proteobacteria	Gammaproteobacteria	Aeromonadales	Aeromonadaceae	Aeromonas	Aeromonas veronii
670.436	Vibrio parahaemolyticus strain 10329	Bacteria	Proteobacteria	Gammaproteobacteria	Vibrionales	Vibrionaceae	Vibrio	Vibrio harveyi
670.437	Vibrio parahaemolyticus strain FORC_008	Bacteria	Proteobacteria	Gammaproteobacteria	Vibrionales	Vibrionaceae	Vibrio	Vibrio harveyi
674.46	Vibrio mimicus strain ATCC 33654	Bacteria	Proteobacteria	Gammaproteobacteria	Vibrionales	Vibrionaceae	Vibrio	Vibrio mimicus
676.24	Vibrio fluvialis strain ATCC 33809	Bacteria	Proteobacteria	Gammaproteobacteria	Vibrionales	Vibrionaceae	Vibrio	Vibrio fluvialis
703.7	Plesiomonas shigelloides GN7	Bacteria	Proteobacteria	Gammaproteobacteria	Enterobacterales	-	Plesiomonas	Plesiomonas shigelloides
726.153	Haemophilus haemolyticus BEED18	Bacteria	Proteobacteria	Gammaproteobacteria	Pasteurellales	Pasteurellaceae	Haemophilus	Haemophilus haemolyticus
727.1826	Haemophilus influenzae BEED16	Bacteria	Proteobacteria	Gammaproteobacteria	Pasteurellales	Pasteurellaceae	Haemophilus	Haemophilus influenzae
727.305	Haemophilus influenzae Hi375	Bacteria	Proteobacteria	Gammaproteobacteria	Pasteurellales	Pasteurellaceae	Haemophilus	Haemophilus influenzae
727.532	Haemophilus influenzae strain 477	Bacteria	Proteobacteria	Gammaproteobacteria	Pasteurellales	Pasteurellaceae	Haemophilus	Haemophilus influenzae
729.20	Haemophilus parainfluenzae strain 215035-2-ISO5	Bacteria	Proteobacteria	Gammaproteobacteria	Pasteurellales	Pasteurellaceae	Haemophilus	Haemophilus parainfluenzae
729.354	Haemophilus parainfluenzae BEED17	Bacteria	Proteobacteria	Gammaproteobacteria	Pasteurellales	Pasteurellaceae	Haemophilus	Haemophilus parainfluenzae
730.11	[Haemophilus] ducreyi strain Cutaneous leg ulcer strain 2	Bacteria	Proteobacteria	Gammaproteobacteria	Pasteurellales	Pasteurellaceae	Haemophilus	[Haemophilus] ducreyi
732.8	Aggregatibacter aphrophilus strain W10433	Bacteria	Proteobacteria	Gammaproteobacteria	Pasteurellales	Pasteurellaceae	Aggregatibacter	Aggregatibacter aphrophilus
817.58	Bacteroides fragilis strain BOB25	Bacteria	Bacteroidetes	Bacteroidia	Bacteroidales	Bacteroidaceae	Bacteroides	Bacteroides fragilis
818.23	Bacteroides thetaiotaomicron strain 7330	Bacteria	Bacteroidetes	Bacteroidia	Bacteroidales	Bacteroidaceae	Bacteroides	Bacteroides thetaiotaomicron
821.40	Bacteroides vulgatus strain mpk	Bacteria	Bacteroidetes	Bacteroidia	Bacteroidales	Bacteroidaceae	Bacteroides	Bacteroides vulgatus
827.3	Campylobacter ureolyticus strain CIT007	Bacteria	Proteobacteria	Epsilonproteobacteria	Campylobacterales	Campylobacteraceae	Campylobacter	Campylobacter ureolyticus
837.83	Porphyromonas gingivalis strain A7436	Bacteria	Bacteroidetes	Bacteroidia	Bacteroidales	Porphyromonadaceae	Porphyromonas	Porphyromonas gingivalis
838.107	Prevotella sp. BEED25	Bacteria	Bacteroidetes	Bacteroidia	Bacteroidales	Prevotellaceae	Prevotella	-
851.120	Fusobacterium nucleatum BEED12	Bacteria	Fusobacteria	Fusobacteriia	Fusobacteriales	Fusobacteriaceae	Fusobacterium	Fusobacterium nucleatum
853.234	Faecalibacterium prausnitzii FPSSTS7063_SV	Bacteria	Firmicutes	Clostridia	Clostridiales	Ruminococcaceae	Faecalibacterium	Faecalibacterium prausnitzii
853.820	Faecalibacterium prausnitzii SSTS_Bg7063_v2	Bacteria	Firmicutes	Clostridia	Clostridiales	Ruminococcaceae	Faecalibacterium	Faecalibacterium prausnitzii
860.70	Fusobacterium periodonticum BEED13	Bacteria	Fusobacteria	Fusobacteriia	Fusobacteriales	Fusobacteriaceae	Fusobacterium	Fusobacterium periodonticum
907.4	Megasphaera elsdenii	Bacteria	Firmicutes	Negativicutes	Veillonellales	Veillonellaceae	Megasphaera	Megasphaera elsdenii
971.17	Selenomonas ruminantium strain L14	Bacteria	Firmicutes	Negativicutes	Selenomonadales	Selenomonadaceae	Selenomonas	Selenomonas ruminantium
1260.17	Finegoldia magna LFYP121	Bacteria	Firmicutes	Tissierellia	Tissierellales	Peptoniphilaceae	Finegoldia	Finegoldia magna
1270.27	Micrococcus luteus strain RIT324w	Bacteria	Actinobacteria	Actinobacteria	Micrococcales	Micrococcaceae	Micrococcus	Micrococcus luteus
1270.28	Micrococcus luteus strain RIT304	Bacteria	Actinobacteria	Actinobacteria	Micrococcales	Micrococcaceae	Micrococcus	Micrococcus luteus
1270.29	Micrococcus luteus strain RIT305	Bacteria	Actinobacteria	Actinobacteria	Micrococcales	Micrococcaceae	Micrococcus	Micrococcus luteus
1270.31	Micrococcus luteus strain trpE16	Bacteria	Actinobacteria	Actinobacteria	Micrococcales	Micrococcaceae	Micrococcus	Micrococcus luteus
1270.32	Micrococcus luteus strain 1058_MLUT	Bacteria	Actinobacteria	Actinobacteria	Micrococcales	Micrococcaceae	Micrococcus	Micrococcus luteus
1270.34	Micrococcus luteus strain NDB3Y10	Bacteria	Actinobacteria	Actinobacteria	Micrococcales	Micrococcaceae	Micrococcus	Micrococcus luteus
1276.4	Kytococcus sedentarius strain 1083_KSED	Bacteria	Actinobacteria	Actinobacteria	Micrococcales	Dermacoccaceae	Kytococcus	Kytococcus sedentarius
1276.5	Kytococcus sedentarius strain 262_KSED	Bacteria	Actinobacteria	Actinobacteria	Micrococcales	Dermacoccaceae	Kytococcus	Kytococcus sedentarius
1280.12686	Staphylococcus aureus LFYP88	Bacteria	Firmicutes	Bacilli	Bacillales	Staphylococcaceae	Staphylococcus	Staphylococcus aureus
1280.19125	Staphylococcus aureus BEED30	Bacteria	Firmicutes	Bacilli	Bacillales	Staphylococcaceae	Staphylococcus	Staphylococcus aureus
1286.63	Staphylococcus simulans LFYP27	Bacteria	Firmicutes	Bacilli	Bacillales	Staphylococcaceae	Staphylococcus	Staphylococcus simulans
1301.176	Streptococcus sp. BEED32	Bacteria	Firmicutes	Bacilli	Lactobacillales	Streptococcaceae	Streptococcus	-
1303.149	Streptococcus oralis LFYP117	Bacteria	Firmicutes	Bacilli	Lactobacillales	Streptococcaceae	Streptococcus	Streptococcus oralis
1304.173	Streptococcus salivarius strain NCTC 8618	Bacteria	Firmicutes	Bacilli	Lactobacillales	Streptococcaceae	Streptococcus	Streptococcus salivarius
1304.182	Streptococcus salivarius strain JF	Bacteria	Firmicutes	Bacilli	Lactobacillales	Streptococcaceae	Streptococcus	Streptococcus salivarius
1304.245	Streptococcus salivarius strain ATCC 27945	Bacteria	Firmicutes	Bacilli	Lactobacillales	Streptococcaceae	Streptococcus	Streptococcus salivarius
1304.435	Streptococcus salivarius SS_Bg39_v2	Bacteria	Firmicutes	Bacilli	Lactobacillales	Streptococcaceae	Streptococcus	Streptococcus salivarius
1304.573	Streptococcus salivarius BEED36	Bacteria	Firmicutes	Bacilli	Lactobacillales	Streptococcaceae	Streptococcus	Streptococcus salivarius
1308.608	Streptococcus thermophilus BEED37	Bacteria	Firmicutes	Bacilli	Lactobacillales	Streptococcaceae	Streptococcus	Streptococcus thermophilus
1309.148	Streptococcus mutans BEED33	Bacteria	Firmicutes	Bacilli	Lactobacillales	Streptococcaceae	Streptococcus	Streptococcus mutans
1311.1914	Streptococcus agalactiae BEED28	Bacteria	Firmicutes	Bacilli	Lactobacillales	Streptococcaceae	Streptococcus	Streptococcus agalactiae
1313.16321	Streptococcus pneumoniae BEED35	Bacteria	Firmicutes	Bacilli	Lactobacillales	Streptococcaceae	Streptococcus	Streptococcus pneumoniae
1318.171	Streptococcus parasanguinis BEED34	Bacteria	Firmicutes	Bacilli	Lactobacillales	Streptococcaceae	Streptococcus	Streptococcus parasanguinis
1318.48	Streptococcus parasanguinis LFYP13	Bacteria	Firmicutes	Bacilli	Lactobacillales	Streptococcaceae	Streptococcus	Streptococcus parasanguinis
1318.8	Streptococcus parasanguinis strain MGH413	Bacteria	Firmicutes	Bacilli	Lactobacillales	Streptococcaceae	Streptococcus	Streptococcus parasanguinis
1328.12	Streptococcus anginosus SA1	Bacteria	Firmicutes	Bacilli	Lactobacillales	Streptococcaceae	Streptococcus	Streptococcus anginosus
1328.20	Streptococcus anginosus strain J4211	Bacteria	Firmicutes	Bacilli	Lactobacillales	Streptococcaceae	Streptococcus	Streptococcus anginosus
1328.24	Streptococcus anginosus strain J4206	Bacteria	Firmicutes	Bacilli	Lactobacillales	Streptococcaceae	Streptococcus	Streptococcus anginosus
1328.82	Streptococcus anginosus strain NCTC10713	Bacteria	Firmicutes	Bacilli	Lactobacillales	Streptococcaceae	Streptococcus	Streptococcus anginosus
1328.83	Streptococcus anginosus BEED29	Bacteria	Firmicutes	Bacilli	Lactobacillales	Streptococcaceae	Streptococcus	Streptococcus anginosus
1334.143	Streptococcus dysgalactiae BEED31	Bacteria	Firmicutes	Bacilli	Lactobacillales	Streptococcaceae	Streptococcus	Streptococcus dysgalactiae
1351.412	Enterococcus faecalis KB1	Bacteria	Firmicutes	Bacilli	Lactobacillales	Enterococcaceae	Enterococcus	Enterococcus faecalis
1354.41	Enterococcus hirae strain FDAARGOS_234	Bacteria	Firmicutes	Bacilli	Lactobacillales	Enterococcaceae	Enterococcus	Enterococcus hirae
1354.64	Enterococcus hirae strain NCTC13383	Bacteria	Firmicutes	Bacilli	Lactobacillales	Enterococcaceae	Enterococcus	Enterococcus hirae
1354.73	Enterococcus hirae strain NCTC12368	Bacteria	Firmicutes	Bacilli	Lactobacillales	Enterococcaceae	Enterococcus	Enterococcus hirae
1354.8	Enterococcus hirae strain R17	Bacteria	Firmicutes	Bacilli	Lactobacillales	Enterococcaceae	Enterococcus	Enterococcus hirae
1354.82	Enterococcus hirae BEED11	Bacteria	Firmicutes	Bacilli	Lactobacillales	Enterococcaceae	Enterococcus	Enterococcus hirae
1379.3	Gemella haemolysans strain DNF01167	Bacteria	Firmicutes	Bacilli	Bacillales	Bacillales Family XI. Incertae Sedis	Gemella	Gemella haemolysans
1379.45	Gemella haemolysans strain NCTC10459	Bacteria	Firmicutes	Bacilli	Bacillales	Bacillales Family XI. Incertae Sedis	Gemella	Gemella haemolysans
1379.83	Gemella haemolysans BEED14	Bacteria	Firmicutes	Bacilli	Bacillales	Bacillales Family XI. Incertae Sedis	Gemella	Gemella haemolysans
1390.112	Bacillus amyloliquefaciens L-H15	Bacteria	Firmicutes	Bacilli	Bacillales	Bacillaceae	Bacillus	Bacillus amyloliquefaciens
1396.420	Bacillus cereus strain FT9	Bacteria	Firmicutes	Bacilli	Bacillales	Bacillaceae	Bacillus	Bacillus cereus
1396.426	Bacillus cereus strain FORC_005	Bacteria	Firmicutes	Bacilli	Bacillales	Bacillaceae	Bacillus	Bacillus cereus
1402.62	Bacillus licheniformis strain 5NAP23	Bacteria	Firmicutes	Bacilli	Bacillales	Bacillaceae	Bacillus	Bacillus licheniformis
1402.76	Bacillus licheniformis strain HRBL-15TDI7	Bacteria	Firmicutes	Bacilli	Bacillales	Bacillaceae	Bacillus	Bacillus licheniformis
1404.50	Bacillus megaterium strain SF185	Bacteria	Firmicutes	Bacilli	Bacillales	Bacillaceae	Bacillus	Bacillus megaterium
1405.13	Bacillus mycoides strain 219298	Bacteria	Firmicutes	Bacilli	Bacillales	Bacillaceae	Bacillus	Bacillus mycoides
1405.8	Bacillus mycoides BHP	Bacteria	Firmicutes	Bacilli	Bacillales	Bacillaceae	Bacillus	Bacillus mycoides
1408.101	Bacillus pumilus strain TUAT1	Bacteria	Firmicutes	Bacilli	Bacillales	Bacillaceae	Bacillus	Bacillus pumilus
1421.38	Lysinibacillus sphaericus strain OT4b.25	Bacteria	Firmicutes	Bacilli	Bacillales	Bacillaceae	Lysinibacillus	Lysinibacillus sphaericus
1421.39	Lysinibacillus sphaericus strain III(3)7	Bacteria	Firmicutes	Bacilli	Bacillales	Bacillaceae	Lysinibacillus	Lysinibacillus sphaericus
1421.40	Lysinibacillus sphaericus strain OT4b.49	Bacteria	Firmicutes	Bacilli	Bacillales	Bacillaceae	Lysinibacillus	Lysinibacillus sphaericus
1421.41	Lysinibacillus sphaericus strain 2362	Bacteria	Firmicutes	Bacilli	Bacillales	Bacillaceae	Lysinibacillus	Lysinibacillus sphaericus
1423.135	Bacillus subtilis B-1	Bacteria	Firmicutes	Bacilli	Bacillales	Bacillaceae	Bacillus	Bacillus subtilis
1423.136	Bacillus subtilis ATCC 13952	Bacteria	Firmicutes	Bacilli	Bacillales	Bacillaceae	Bacillus	Bacillus subtilis
1428.250	Bacillus thuringiensis HD571	Bacteria	Firmicutes	Bacilli	Bacillales	Bacillaceae	Bacillus	Bacillus thuringiensis
1428.252	Bacillus thuringiensis 97-27	Bacteria	Firmicutes	Bacilli	Bacillales	Bacillaceae	Bacillus	Bacillus thuringiensis
1452.26	Bacillus atrophaeus strain DJHJ8	Bacteria	Firmicutes	Bacilli	Bacillales	Bacillaceae	Bacillus	Bacillus atrophaeus
1504.11	Clostridium septicum strain P1044	Bacteria	Firmicutes	Clostridia	Clostridiales	Clostridiaceae	Clostridium	Clostridium septicum
1504.35	Clostridium septicum strain DSM 7534	Bacteria	Firmicutes	Clostridia	Clostridiales	Clostridiaceae	Clostridium	Clostridium septicum
1512.8	[Clostridium] symbiosum TS_8243C_1E9	Bacteria	Firmicutes	Clostridia	Clostridiales	Lachnospiraceae	Lachnoclostridium	[Clostridium] symbiosum
1598.263	Lactobacillus reuteri I49	Bacteria	Firmicutes	Bacilli	Lactobacillales	Lactobacillaceae	Lactobacillus	Lactobacillus reuteri
1601.5	Lactobacillus agilis strain Marseille	Bacteria	Firmicutes	Bacilli	Lactobacillales	Lactobacillaceae	Lactobacillus	Lactobacillus agilis
1632.12	Lactobacillus oris BEED19	Bacteria	Firmicutes	Bacilli	Lactobacillales	Lactobacillaceae	Lactobacillus	Lactobacillus oris
1632.6	Lactobacillus oris strain J-1	Bacteria	Firmicutes	Bacilli	Lactobacillales	Lactobacillaceae	Lactobacillus	Lactobacillus oris
1639.1007	Listeria monocytogenes strain JF5171	Bacteria	Firmicutes	Bacilli	Bacillales	Listeriaceae	Listeria	Listeria monocytogenes
1639.166	Listeria monocytogenes serotype 7 str. SLCC2482	Bacteria	Firmicutes	Bacilli	Bacillales	Listeriaceae	Listeria	Listeria monocytogenes
1654.11	Actinomyces sp. BEED04	Bacteria	Actinobacteria	Actinobacteria	Actinomycetales	Actinomycetaceae	Actinomyces	-
1655.46	Actinomyces naeslundii strain MB-1	Bacteria	Actinobacteria	Actinobacteria	Actinomycetales	Actinomycetaceae	Actinomyces	Actinomyces naeslundii
1655.49	Actinomyces naeslundii strain NCTC 10301	Bacteria	Actinobacteria	Actinobacteria	Actinomycetales	Actinomycetaceae	Actinomyces	Actinomyces naeslundii
1655.52	Actinomyces naeslundii strain ATCC 27039	Bacteria	Actinobacteria	Actinobacteria	Actinomycetales	Actinomycetaceae	Actinomyces	Actinomyces naeslundii
1655.82	Actinomyces naeslundii BEED02	Bacteria	Actinobacteria	Actinobacteria	Actinomycetales	Actinomycetaceae	Actinomyces	Actinomyces naeslundii
1660.10	Actinomyces odontolyticus LFYP35	Bacteria	Actinobacteria	Actinobacteria	Actinomycetales	Actinomycetaceae	Actinomyces	Actinomyces odontolyticus
1660.4	Actinomyces odontolyticus strain XH001	Bacteria	Actinobacteria	Actinobacteria	Actinomycetales	Actinomycetaceae	Actinomyces	Actinomyces odontolyticus
1678.111	Bifidobacterium longum subsp. infantis R0033	Bacteria	Actinobacteria	Actinobacteria	Bifidobacteriales	Bifidobacteriaceae	Bifidobacterium	Bifidobacterium longum
1679.10	Bifidobacterium longum subsp. longum strain CCUG30698	Bacteria	Actinobacteria	Actinobacteria	Bifidobacteriales	Bifidobacteriaceae	Bifidobacterium	Bifidobacterium longum
1679.11	Bifidobacterium longum subsp. longum strain 9	Bacteria	Actinobacteria	Actinobacteria	Bifidobacteriales	Bifidobacteriaceae	Bifidobacterium	Bifidobacterium longum
1679.12	Bifidobacterium longum subsp. longum strain 7	Bacteria	Actinobacteria	Actinobacteria	Bifidobacteriales	Bifidobacteriaceae	Bifidobacterium	Bifidobacterium longum
1679.13	Bifidobacterium longum subsp. longum strain MC-42	Bacteria	Actinobacteria	Actinobacteria	Bifidobacteriales	Bifidobacteriaceae	Bifidobacterium	Bifidobacterium longum
1679.14	Bifidobacterium longum subsp. longum strain LO-06	Bacteria	Actinobacteria	Actinobacteria	Bifidobacteriales	Bifidobacteriaceae	Bifidobacterium	Bifidobacterium longum
1679.20	Bifidobacterium longum subsp. longum strain LO-10	Bacteria	Actinobacteria	Actinobacteria	Bifidobacteriales	Bifidobacteriaceae	Bifidobacterium	Bifidobacterium longum
1679.21	Bifidobacterium longum subsp. longum strain LO-21	Bacteria	Actinobacteria	Actinobacteria	Bifidobacteriales	Bifidobacteriaceae	Bifidobacterium	Bifidobacterium longum
1679.22	Bifidobacterium longum subsp. longum strain LO-C29	Bacteria	Actinobacteria	Actinobacteria	Bifidobacteriales	Bifidobacteriaceae	Bifidobacterium	Bifidobacterium longum
1679.23	Bifidobacterium longum subsp. longum strain LO-K29a	Bacteria	Actinobacteria	Actinobacteria	Bifidobacteriales	Bifidobacteriaceae	Bifidobacterium	Bifidobacterium longum
1679.24	Bifidobacterium longum subsp. longum strain LO-K29b	Bacteria	Actinobacteria	Actinobacteria	Bifidobacteriales	Bifidobacteriaceae	Bifidobacterium	Bifidobacterium longum
1679.26	Bifidobacterium longum subsp. longum strain AH1206	Bacteria	Actinobacteria	Actinobacteria	Bifidobacteriales	Bifidobacteriaceae	Bifidobacterium	Bifidobacterium longum
1679.29	Bifidobacterium longum subsp. longum strain 296B	Bacteria	Actinobacteria	Actinobacteria	Bifidobacteriales	Bifidobacteriaceae	Bifidobacterium	Bifidobacterium longum
1679.31	Bifidobacterium longum subsp. longum strain W11	Bacteria	Actinobacteria	Actinobacteria	Bifidobacteriales	Bifidobacteriaceae	Bifidobacterium	Bifidobacterium longum
1679.45	Bifidobacterium longum subsp. longum strain DS32_3	Bacteria	Actinobacteria	Actinobacteria	Bifidobacteriales	Bifidobacteriaceae	Bifidobacterium	Bifidobacterium longum
1679.51	Bifidobacterium longum subsp. longum strain BORI	Bacteria	Actinobacteria	Actinobacteria	Bifidobacteriales	Bifidobacteriaceae	Bifidobacterium	Bifidobacterium longum
1679.55	Bifidobacterium longum subsp. longum strain VKPM Ac-1636	Bacteria	Actinobacteria	Actinobacteria	Bifidobacteriales	Bifidobacteriaceae	Bifidobacterium	Bifidobacterium longum
1679.6	Bifidobacterium longum subsp. longum strain LMG 13197	Bacteria	Actinobacteria	Actinobacteria	Bifidobacteriales	Bifidobacteriaceae	Bifidobacterium	Bifidobacterium longum
1679.7	Bifidobacterium longum subsp. longum strain VMKB44	Bacteria	Actinobacteria	Actinobacteria	Bifidobacteriales	Bifidobacteriaceae	Bifidobacterium	Bifidobacterium longum
1679.8	Bifidobacterium longum subsp. longum strain BLOI2	Bacteria	Actinobacteria	Actinobacteria	Bifidobacteriales	Bifidobacteriaceae	Bifidobacterium	Bifidobacterium longum
1679.9	Bifidobacterium longum subsp. longum strain NCIMB8809	Bacteria	Actinobacteria	Actinobacteria	Bifidobacteriales	Bifidobacteriaceae	Bifidobacterium	Bifidobacterium longum
1680.5	Bifidobacterium adolescentis strain BBMN23	Bacteria	Actinobacteria	Actinobacteria	Bifidobacteriales	Bifidobacteriaceae	Bifidobacterium	Bifidobacterium adolescentis
1681.51	Bifidobacterium bifidum strain 156B	Bacteria	Actinobacteria	Actinobacteria	Bifidobacteriales	Bifidobacteriaceae	Bifidobacterium	Bifidobacterium bifidum
1682.13	Bifidobacterium longum subsp. infantis BIC1206122787	Bacteria	Actinobacteria	Actinobacteria	Bifidobacteriales	Bifidobacteriaceae	Bifidobacterium	Bifidobacterium longum
1682.14	Bifidobacterium longum subsp. infantis BIC1307292462	Bacteria	Actinobacteria	Actinobacteria	Bifidobacteriales	Bifidobacteriaceae	Bifidobacterium	Bifidobacterium longum
1682.15	Bifidobacterium longum subsp. infantis BIC1401111250	Bacteria	Actinobacteria	Actinobacteria	Bifidobacteriales	Bifidobacteriaceae	Bifidobacterium	Bifidobacterium longum
1682.16	Bifidobacterium longum subsp. infantis BIC1401212621b	Bacteria	Actinobacteria	Actinobacteria	Bifidobacteriales	Bifidobacteriaceae	Bifidobacterium	Bifidobacterium longum
1682.17	Bifidobacterium longum subsp. infantis BIB1401272845a	Bacteria	Actinobacteria	Actinobacteria	Bifidobacteriales	Bifidobacteriaceae	Bifidobacterium	Bifidobacterium longum
1682.18	Bifidobacterium longum subsp. infantis BIC1401212621a	Bacteria	Actinobacteria	Actinobacteria	Bifidobacteriales	Bifidobacteriaceae	Bifidobacterium	Bifidobacterium longum
1682.19	Bifidobacterium longum subsp. infantis BIB1401272845b	Bacteria	Actinobacteria	Actinobacteria	Bifidobacteriales	Bifidobacteriaceae	Bifidobacterium	Bifidobacterium longum
1682.20	Bifidobacterium longum subsp. infantis BIB1401242951	Bacteria	Actinobacteria	Actinobacteria	Bifidobacteriales	Bifidobacteriaceae	Bifidobacterium	Bifidobacterium longum
1682.23	Bifidobacterium longum subsp. longum CECT 7210	Bacteria	Actinobacteria	Actinobacteria	Bifidobacteriales	Bifidobacteriaceae	Bifidobacterium	Bifidobacterium longum
1682.24	Bifidobacterium longum subsp. infantis strain BT1	Bacteria	Actinobacteria	Actinobacteria	Bifidobacteriales	Bifidobacteriaceae	Bifidobacterium	Bifidobacterium longum
1682.27	Bifidobacterium longum subsp. infantis strain IN-07	Bacteria	Actinobacteria	Actinobacteria	Bifidobacteriales	Bifidobacteriaceae	Bifidobacterium	Bifidobacterium longum
1682.29	Bifidobacterium longum subsp. infantis strain IN-F29	Bacteria	Actinobacteria	Actinobacteria	Bifidobacteriales	Bifidobacteriaceae	Bifidobacterium	Bifidobacterium longum
1682.30	Bifidobacterium longum subsp. infantis strain TPY12-1	Bacteria	Actinobacteria	Actinobacteria	Bifidobacteriales	Bifidobacteriaceae	Bifidobacterium	Bifidobacterium longum
1682.32	Bifidobacterium longum subsp. infantis strain 1888B	Bacteria	Actinobacteria	Actinobacteria	Bifidobacteriales	Bifidobacteriaceae	Bifidobacterium	Bifidobacterium longum
1682.37	Bifidobacterium longum subsp. infantis strain NCTC13219	Bacteria	Actinobacteria	Actinobacteria	Bifidobacteriales	Bifidobacteriaceae	Bifidobacterium	Bifidobacterium longum
1682.48	Bifidobacterium longum subsp. infantis strain NCTC11817	Bacteria	Actinobacteria	Actinobacteria	Bifidobacteriales	Bifidobacteriaceae	Bifidobacterium	Bifidobacterium longum
1682.49	Bifidobacterium longum subsp. infantis Malawi_264A_V2.1.4_MC2	Bacteria	Actinobacteria	Actinobacteria	Bifidobacteriales	Bifidobacteriaceae	Bifidobacterium	Bifidobacterium longum
1682.50	Bifidobacterium longum subsp. infantis Malawi_264A_V2.1.8_MC1	Bacteria	Actinobacteria	Actinobacteria	Bifidobacteriales	Bifidobacteriaceae	Bifidobacterium	Bifidobacterium longum
1683.4	Bifidobacterium angulatum strain GT102	Bacteria	Actinobacteria	Actinobacteria	Bifidobacteriales	Bifidobacteriaceae	Bifidobacterium	Bifidobacterium angulatum
1686.6	Bifidobacterium catenulatum strain 1899B	Bacteria	Actinobacteria	Actinobacteria	Bifidobacteriales	Bifidobacteriaceae	Bifidobacterium	Bifidobacterium catenulatum
1710.9	Cellulosimicrobium cellulans strain DSM 43879	Bacteria	Actinobacteria	Actinobacteria	Micrococcales	Promicromonosporaceae	Cellulosimicrobium	Cellulosimicrobium cellulans
1747.86	Propionibacterium acnes strain PA_30_2_L1	Bacteria	Actinobacteria	Actinobacteria	Propionibacteriales	Propionibacteriaceae	Cutibacterium	Cutibacterium acnes
1747.88	Propionibacterium acnes strain PA_21_1_L1	Bacteria	Actinobacteria	Actinobacteria	Propionibacteriales	Propionibacteriaceae	Cutibacterium	Cutibacterium acnes
1747.89	Propionibacterium acnes strain PA_15_2_L1	Bacteria	Actinobacteria	Actinobacteria	Propionibacteriales	Propionibacteriaceae	Cutibacterium	Cutibacterium acnes
1747.90	Propionibacterium acnes strain PA_12_1_R1	Bacteria	Actinobacteria	Actinobacteria	Propionibacteriales	Propionibacteriaceae	Cutibacterium	Cutibacterium acnes
1747.91	Propionibacterium acnes strain PA_12_1_L1	Bacteria	Actinobacteria	Actinobacteria	Propionibacteriales	Propionibacteriaceae	Cutibacterium	Cutibacterium acnes
1747.92	Propionibacterium acnes strain A1-14	Bacteria	Actinobacteria	Actinobacteria	Propionibacteriales	Propionibacteriaceae	Cutibacterium	Cutibacterium acnes
1747.94	Propionibacterium acnes strain KCOM 1861 (= ChDC B594)	Bacteria	Actinobacteria	Actinobacteria	Propionibacteriales	Propionibacteriaceae	Cutibacterium	Cutibacterium acnes
1748.12	Propionibacterium acidipropionici strain CGMCC 1.2230	Bacteria	Actinobacteria	Actinobacteria	Propionibacteriales	Propionibacteriaceae	Acidipropionibacterium	Acidipropionibacterium acidipropionici
1748.13	Propionibacterium acidipropionici strain ATCC 55737	Bacteria	Actinobacteria	Actinobacteria	Propionibacteriales	Propionibacteriaceae	Acidipropionibacterium	Acidipropionibacterium acidipropionici
1833.80	Rhodococcus erythropolis strain BG43	Bacteria	Actinobacteria	Actinobacteria	Corynebacteriales	Nocardiaceae	Rhodococcus	Rhodococcus erythropolis
2035.5	Curtobacterium flaccumfaciens MEB126	Bacteria	Actinobacteria	Actinobacteria	Micrococcales	Microbacteriaceae	Curtobacterium	Curtobacterium flaccumfaciens
2047.138	Rothia dentocariosa strain NCTC10917	Bacteria	Actinobacteria	Actinobacteria	Micrococcales	Micrococcaceae	Rothia	Rothia dentocariosa
2047.139	Rothia dentocariosa strain NCTC10207	Bacteria	Actinobacteria	Actinobacteria	Micrococcales	Micrococcaceae	Rothia	Rothia dentocariosa
2047.140	Rothia dentocariosa strain NCTC10918	Bacteria	Actinobacteria	Actinobacteria	Micrococcales	Micrococcaceae	Rothia	Rothia dentocariosa
2047.141	Rothia dentocariosa BEED26	Bacteria	Actinobacteria	Actinobacteria	Micrococcales	Micrococcaceae	Rothia	Rothia dentocariosa
2741.3	Peptococcus niger strain DSM 20475	Bacteria	Firmicutes	Clostridia	Clostridiales	Peptococcaceae	Peptococcus	Peptococcus niger
28025.4	Bifidobacterium animalis subsp. lactis RH	Bacteria	Actinobacteria	Actinobacteria	Bifidobacteriales	Bifidobacteriaceae	Bifidobacterium	Bifidobacterium animalis
28026.102	Bifidobacterium pseudocatenulatum strain 1896B	Bacteria	Actinobacteria	Actinobacteria	Bifidobacteriales	Bifidobacteriaceae	Bifidobacterium	Bifidobacterium pseudocatenulatum
28026.137	Bifidobacterium pseudocatenulatum strain TF05-2AC	Bacteria	Actinobacteria	Actinobacteria	Bifidobacteriales	Bifidobacteriaceae	Bifidobacterium	Bifidobacterium pseudocatenulatum
28026.188	Bifidobacterium pseudocatenulatum strain 12	Bacteria	Actinobacteria	Actinobacteria	Bifidobacteriales	Bifidobacteriaceae	Bifidobacterium	Bifidobacterium pseudocatenulatum
28026.27	Bifidobacterium pseudocatenulatum strain CA-05	Bacteria	Actinobacteria	Actinobacteria	Bifidobacteriales	Bifidobacteriaceae	Bifidobacterium	Bifidobacterium pseudocatenulatum
28052.3	Lachnospira pectinoschiza	Bacteria	Firmicutes	Clostridia	Clostridiales	Lachnospiraceae	Lachnospira	Lachnospira pectinoschiza
28116.7	Bacteroides ovatus strain ATCC 8483	Bacteria	Bacteroidetes	Bacteroidia	Bacteroidales	Bacteroidaceae	Bacteroides	Bacteroides ovatus
28125.4	Prevotella bivia strain GED7880	Bacteria	Bacteroidetes	Bacteroidia	Bacteroidales	Prevotellaceae	Prevotella	Prevotella bivia
28127.3	Prevotella buccalis strain UMB0536	Bacteria	Bacteroidetes	Bacteroidia	Bacteroidales	Prevotellaceae	Prevotella	Prevotella buccalis
28128.5	Prevotella corporis strain MJR7716	Bacteria	Bacteroidetes	Bacteroidia	Bacteroidales	Prevotellaceae	Prevotella	Prevotella corporis
28129.11	Prevotella denticola strain KCOM 1525	Bacteria	Bacteroidetes	Bacteroidia	Bacteroidales	Prevotellaceae	Prevotella	Prevotella denticola
28129.12	Prevotella denticola strain NCTC13067	Bacteria	Bacteroidetes	Bacteroidia	Bacteroidales	Prevotellaceae	Prevotella	Prevotella denticola
28130.4	Prevotella disiens strain TF09-12	Bacteria	Bacteroidetes	Bacteroidia	Bacteroidales	Prevotellaceae	Prevotella	Prevotella disiens
28130.5	Prevotella disiens strain NCTC11157	Bacteria	Bacteroidetes	Bacteroidia	Bacteroidales	Prevotellaceae	Prevotella	Prevotella disiens
28131.10	Prevotella intermedia strain OMA14	Bacteria	Bacteroidetes	Bacteroidia	Bacteroidales	Prevotellaceae	Prevotella	Prevotella intermedia
28131.24	Prevotella intermedia strain KCOM 1944	Bacteria	Bacteroidetes	Bacteroidia	Bacteroidales	Prevotellaceae	Prevotella	Prevotella intermedia
28131.35	Prevotella intermedia strain KCOM 2734	Bacteria	Bacteroidetes	Bacteroidia	Bacteroidales	Prevotellaceae	Prevotella	Prevotella intermedia
28131.5	Prevotella intermedia strain ATCC 49046	Bacteria	Bacteroidetes	Bacteroidia	Bacteroidales	Prevotellaceae	Prevotella	Prevotella intermedia
28132.3	Prevotella melaninogenica strain FDAARGOS_306	Bacteria	Bacteroidetes	Bacteroidia	Bacteroidales	Prevotellaceae	Prevotella	Prevotella melaninogenica
28132.5	Prevotella melaninogenica strain GAI 07411	Bacteria	Bacteroidetes	Bacteroidia	Bacteroidales	Prevotellaceae	Prevotella	Prevotella melaninogenica
28132.6	Prevotella melaninogenica BEED24	Bacteria	Bacteroidetes	Bacteroidia	Bacteroidales	Prevotellaceae	Prevotella	Prevotella melaninogenica
28141.40	Cronobacter sakazakii strain ATCC 29544	Bacteria	Proteobacteria	Gammaproteobacteria	Enterobacterales	Enterobacteriaceae	Cronobacter	Cronobacter sakazakii
28141.62	Cronobacter sakazakii strain NCTC 8155	Bacteria	Proteobacteria	Gammaproteobacteria	Enterobacterales	Enterobacteriaceae	Cronobacter	Cronobacter sakazakii
28152.3	Yersinia kristensenii strain ATCC 33639	Bacteria	Proteobacteria	Gammaproteobacteria	Enterobacterales	Yersiniaceae	Yersinia	Yersinia kristensenii
28152.8	Yersinia kristensenii strain Y231	Bacteria	Proteobacteria	Gammaproteobacteria	Enterobacterales	Yersiniaceae	Yersinia	Yersinia kristensenii
28449.59	Neisseria subflava strain M18660	Bacteria	Proteobacteria	Betaproteobacteria	Neisseriales	Neisseriaceae	Neisseria	Neisseria subflava
28449.60	Neisseria subflava BEED22	Bacteria	Proteobacteria	Betaproteobacteria	Neisseriales	Neisseriaceae	Neisseria	Neisseria subflava
28449.61	Neisseria subflava BEED23	Bacteria	Proteobacteria	Betaproteobacteria	Neisseriales	Neisseriaceae	Neisseria	Neisseria subflava
29466.144	Veillonella parvula strain KHUD_VP2	Bacteria	Firmicutes	Negativicutes	Veillonellales	Veillonellaceae	Veillonella	Veillonella parvula
29466.153	Veillonella parvula BEED39	Bacteria	Firmicutes	Negativicutes	Veillonellales	Veillonellaceae	Veillonella	Veillonella parvula
29466.62	Veillonella parvula strain NCTC11810	Bacteria	Firmicutes	Negativicutes	Veillonellales	Veillonellaceae	Veillonella	Veillonella parvula
32019.15	Campylobacter fetus subsp. fetus	Bacteria	Proteobacteria	Epsilonproteobacteria	Campylobacterales	Campylobacteraceae	Campylobacter	Campylobacter fetus
32042.3	Pseudomonas stutzeri ATCC 14405 = CCUG 16156	Bacteria	Proteobacteria	Gammaproteobacteria	Pseudomonadales	Pseudomonadaceae	Pseudomonas	Pseudomonas stutzeri
32067.3	Leptotrichia sp. BEED20	Bacteria	Fusobacteria	Fusobacteriia	Fusobacteriales	Leptotrichiaceae	Leptotrichia	-
33025.13	Phascolarctobacterium faecium strain JCM 30894	Bacteria	Firmicutes	Negativicutes	Acidaminococcales	Acidaminococcaceae	Phascolarctobacterium	Phascolarctobacterium faecium
33037.4	Anaerococcus vaginalis LFYP127	Bacteria	Firmicutes	Tissierellia	Tissierellales	Peptoniphilaceae	Anaerococcus	Anaerococcus vaginalis
33038.15	[Ruminococcus] gnavus TS_8243C_3A11	Bacteria	Firmicutes	Clostridia	Clostridiales	Lachnospiraceae	Blautia	[Ruminococcus] gnavus
33038.800	[Ruminococcus] gnavus RGTS8243C_SV	Bacteria	Firmicutes	Clostridia	Clostridiales	Lachnospiraceae	Blautia	[Ruminococcus] gnavus
33039.1104	Ruminococcus torques RTSSTS7063	Bacteria	Firmicutes	Clostridia	Clostridiales	Lachnospiraceae	Blautia	Ruminococcus torques
33053.3	Neisseria perflava strain CCH6-A12	Bacteria	Proteobacteria	Betaproteobacteria	Neisseriales	Neisseriaceae	Neisseria	Neisseria perflava
33945.10	Enterococcus avium strain NCTC9938	Bacteria	Firmicutes	Bacilli	Lactobacillales	Enterococcaceae	Enterococcus	Enterococcus avium
33945.14	Enterococcus avium strain LC0559/18	Bacteria	Firmicutes	Bacilli	Lactobacillales	Enterococcaceae	Enterococcus	Enterococcus avium
33945.15	Enterococcus avium SS_Bg39_v2	Bacteria	Firmicutes	Bacilli	Lactobacillales	Enterococcaceae	Enterococcus	Enterococcus avium
33945.4	Enterococcus avium strain DSM 20679	Bacteria	Firmicutes	Bacilli	Lactobacillales	Enterococcaceae	Enterococcus	Enterococcus avium
33945.7	Enterococcus avium strain FDAARGOS_180	Bacteria	Firmicutes	Bacilli	Lactobacillales	Enterococcaceae	Enterococcus	Enterococcus avium
33945.8	Enterococcus avium strain FDAARGOS_182	Bacteria	Firmicutes	Bacilli	Lactobacillales	Enterococcaceae	Enterococcus	Enterococcus avium
35703.16	Citrobacter amalonaticus strain YG6	Bacteria	Proteobacteria	Gammaproteobacteria	Enterobacterales	Enterobacteriaceae	Citrobacter	Citrobacter amalonaticus
35703.17	Citrobacter amalonaticus strain YG8	Bacteria	Proteobacteria	Gammaproteobacteria	Enterobacterales	Enterobacteriaceae	Citrobacter	Citrobacter amalonaticus
35703.24	Citrobacter amalonaticus strain FDAARGOS_166	Bacteria	Proteobacteria	Gammaproteobacteria	Enterobacterales	Enterobacteriaceae	Citrobacter	Citrobacter amalonaticus
35703.30	Citrobacter amalonaticus strain FDAARGOS_122	Bacteria	Proteobacteria	Gammaproteobacteria	Enterobacterales	Enterobacteriaceae	Citrobacter	Citrobacter amalonaticus
36809.5	Mycobacterium abscessus	Bacteria	Actinobacteria	Actinobacteria	Corynebacteriales	Mycobacteriaceae	Mycobacterium	Mycobacterium abscessus
39482.4	[Eubacterium] contortum strain 2789STDY5834876	Bacteria	Firmicutes	Clostridia	Clostridiales	Lachnospiraceae	Faecalicatena	Faecalicatena contorta
39486.327	Dorea formicigenerans DFSSTS7063	Bacteria	Firmicutes	Clostridia	Clostridiales	Lachnospiraceae	Dorea	Dorea formicigenerans
39491.41	[Eubacterium] rectale strain R22	Bacteria	Firmicutes	Clostridia	Clostridiales	Lachnospiraceae	-	[Eubacterium] rectale
39777.11	Veillonella atypica strain OK5	Bacteria	Firmicutes	Negativicutes	Veillonellales	Veillonellaceae	Veillonella	Veillonella atypica
39777.28	Veillonella atypica strain AF36-15BH	Bacteria	Firmicutes	Negativicutes	Veillonellales	Veillonellaceae	Veillonella	Veillonella atypica
39777.29	Veillonella atypica strain NCTC11830	Bacteria	Firmicutes	Negativicutes	Veillonellales	Veillonellaceae	Veillonella	Veillonella atypica
39777.37	Veillonella atypica BEED38	Bacteria	Firmicutes	Negativicutes	Veillonellales	Veillonellaceae	Veillonella	Veillonella atypica
40215.38	Acinetobacter junii strain 65	Bacteria	Proteobacteria	Gammaproteobacteria	Pseudomonadales	Moraxellaceae	Acinetobacter	Acinetobacter junii
40215.43	Acinetobacter junii strain lzh-X15	Bacteria	Proteobacteria	Gammaproteobacteria	Pseudomonadales	Moraxellaceae	Acinetobacter	Acinetobacter junii
40215.63	Acinetobacter junii strain NCTC12153	Bacteria	Proteobacteria	Gammaproteobacteria	Pseudomonadales	Moraxellaceae	Acinetobacter	Acinetobacter junii
40215.64	Acinetobacter junii strain NCTC10307	Bacteria	Proteobacteria	Gammaproteobacteria	Pseudomonadales	Moraxellaceae	Acinetobacter	Acinetobacter junii
40215.71	Acinetobacter junii BEED01	Bacteria	Proteobacteria	Gammaproteobacteria	Pseudomonadales	Moraxellaceae	Acinetobacter	Acinetobacter junii
40324.126	Stenotrophomonas maltophilia strain ISMMS3	Bacteria	Proteobacteria	Gammaproteobacteria	Xanthomonadales	Xanthomonadaceae	Stenotrophomonas	Stenotrophomonas maltophilia
40520.1561	Blautia obeum strain af_0058	Bacteria	Firmicutes	Clostridia	Clostridiales	Lachnospiraceae	Blautia	Blautia obeum
40520.1729	Ruminococcus obeum ROSSTS7063	Bacteria	Firmicutes	Clostridia	Clostridiales	Lachnospiraceae	Blautia	Ruminococcus obeum
41514.7	Salmonella enterica subsp. arizonae serovar 62:z4,z23:--	Bacteria	Proteobacteria	Gammaproteobacteria	Enterobacterales	Enterobacteriaceae	Salmonella	Salmonella enterica
42322.7	Eubacterium ruminantium strain ATCC 17233	Bacteria	Firmicutes	Clostridia	Clostridiales	Eubacteriaceae	Eubacterium	Eubacterium ruminantium
42897.19	Shigella flexneri 2a	Bacteria	Proteobacteria	Gammaproteobacteria	Enterobacterales	Enterobacteriaceae	Shigella	Shigella flexneri
43675.106	Rothia mucilaginosa strain FDAARGOS_369	Bacteria	Actinobacteria	Actinobacteria	Micrococcales	Micrococcaceae	Rothia	Rothia mucilaginosa
43675.152	Rothia mucilaginosa strain UMB0024	Bacteria	Actinobacteria	Actinobacteria	Micrococcales	Micrococcaceae	Rothia	Rothia mucilaginosa
43675.207	Rothia mucilaginosa BEED27	Bacteria	Actinobacteria	Actinobacteria	Micrococcales	Micrococcaceae	Rothia	Rothia mucilaginosa
43675.28	Rothia mucilaginosa strain NUM-Rm6536	Bacteria	Actinobacteria	Actinobacteria	Micrococcales	Micrococcaceae	Rothia	Rothia mucilaginosa
44007.3	Enterococcus pseudoavium strain CBA7133	Bacteria	Firmicutes	Bacilli	Lactobacillales	Enterococcaceae	Enterococcus	Enterococcus pseudoavium
45972.8	Staphylococcus pasteuri strain BAB3	Bacteria	Firmicutes	Bacilli	Bacillales	Staphylococcaceae	Staphylococcus	Staphylococcus pasteuri
46124.3	Granulicatella adiacens BEED15	Bacteria	Firmicutes	Bacilli	Lactobacillales	Carnobacteriaceae	Granulicatella	Granulicatella adiacens
47715.283	Lactobacillus rhamnosus LFYP97	Bacteria	Firmicutes	Bacilli	Lactobacillales	Lactobacillaceae	Lactobacillus	Lactobacillus rhamnosus
47917.12	Serratia fonticola strain GS2	Bacteria	Proteobacteria	Gammaproteobacteria	Enterobacterales	Yersiniaceae	Serratia	Serratia fonticola
48296.83	Acinetobacter pittii strain AP_882	Bacteria	Proteobacteria	Gammaproteobacteria	Pseudomonadales	Moraxellaceae	Acinetobacter	Acinetobacter pittii
48296.84	Acinetobacter pittii strain IEC338SC	Bacteria	Proteobacteria	Gammaproteobacteria	Pseudomonadales	Moraxellaceae	Acinetobacter	Acinetobacter pittii
53442.3	Eubacterium callanderi strain NLAE-zl-G225	Bacteria	Firmicutes	Clostridia	Clostridiales	Eubacteriaceae	Eubacterium	Eubacterium callanderi
53442.4	Eubacterium callanderi strain FD	Bacteria	Firmicutes	Clostridia	Clostridiales	Eubacteriaceae	Eubacterium	Eubacterium callanderi
54067.6	Xylophilus ampelinus BEED09	Bacteria	Proteobacteria	Betaproteobacteria	Burkholderiales	-	Xylophilus	Xylophilus ampelinus
57706.21	Citrobacter braakii strain FDAARGOS_290	Bacteria	Proteobacteria	Gammaproteobacteria	Enterobacterales	Enterobacteriaceae	Citrobacter	Citrobacter braakii
59823.18	Prevotella sp. strain UBA10658	Bacteria	Bacteroidetes	Bacteroidia	Bacteroidales	Prevotellaceae	Prevotella	-
61645.42	Enterobacter asburiae strain 35734	Bacteria	Proteobacteria	Gammaproteobacteria	Enterobacterales	Enterobacteriaceae	Enterobacter	Enterobacter cloacae complex
66692.6	Bacillus clausii KSM-K16	Bacteria	Firmicutes	Bacilli	Bacillales	Bacillaceae	Bacillus	Bacillus clausii
66712.6	Propionibacterium freudenreichii subsp. freudenreichii strain 20271T	Bacteria	Actinobacteria	Actinobacteria	Propionibacteriales	Propionibacteriaceae	Propionibacterium	Propionibacterium freudenreichii
66863.3	Ammoniphilus oxalaticus strain RAOx-1	Bacteria	Firmicutes	Bacilli	Bacillales	Paenibacillaceae	Ammoniphilus	Ammoniphilus oxalaticus
67829.4	Citrobacter murliniae strain P080C CL	Bacteria	Proteobacteria	Gammaproteobacteria	Enterobacterales	Enterobacteriaceae	Citrobacter	Citrobacter murliniae
69824.3	[Clostridium] cocleatum strain DSM 1551	Bacteria	Firmicutes	Erysipelotrichia	Erysipelotrichales	Erysipelotrichaceae	Erysipelatoclostridium	[Clostridium] cocleatum
69824.4	[Clostridium] cocleatum strain ATCC 29902	Bacteria	Firmicutes	Erysipelotrichia	Erysipelotrichales	Erysipelotrichaceae	Erysipelatoclostridium	[Clostridium] cocleatum
71421.8	Haemophilus influenzae Rd KW20	Bacteria	Proteobacteria	Gammaproteobacteria	Pasteurellales	Pasteurellaceae	Haemophilus	Haemophilus influenzae
71999.7	Kocuria palustris strain CD07_3	Bacteria	Actinobacteria	Actinobacteria	Micrococcales	Micrococcaceae	Kocuria	Kocuria palustris
74704.5	Staphylococcus cohnii subsp. cohnii strain 532	Bacteria	Firmicutes	Bacilli	Bacillales	Staphylococcaceae	Staphylococcus	Staphylococcus cohnii
76759.14	Pseudomonas monteilii strain USDA-ARS-USMARC-56711	Bacteria	Proteobacteria	Gammaproteobacteria	Pseudomonadales	Pseudomonadaceae	Pseudomonas	Pseudomonas monteilii
76832.7	Myroides odoratimimus strain PR63039	Bacteria	Bacteroidetes	Flavobacteriia	Flavobacteriales	Flavobacteriaceae	Myroides	Myroides odoratimimus
76869.5	Pseudomonas putida GB-1	Bacteria	Proteobacteria	Gammaproteobacteria	Pseudomonadales	Pseudomonadaceae	Pseudomonas	Pseudomonas putida
83333.1	Escherichia coli K12	Bacteria	Proteobacteria	Gammaproteobacteria	Enterobacterales	Enterobacteriaceae	Escherichia	Escherichia coli
83334.1	Escherichia coli O157:H7	Bacteria	Proteobacteria	Gammaproteobacteria	Enterobacterales	Enterobacteriaceae	Escherichia	Escherichia coli
83427.50	uncultured Streptococcus sp. strain UMGS525	Bacteria	Firmicutes	Bacilli	Lactobacillales	Streptococcaceae	Streptococcus	-
85698.28	Achromobacter xylosoxidans strain NCTC10807	Bacteria	Proteobacteria	Betaproteobacteria	Burkholderiales	Alcaligenaceae	Achromobacter	Achromobacter xylosoxidans
85962.8	Helicobacter pylori 26695	Bacteria	Proteobacteria	Epsilonproteobacteria	Campylobacterales	Helicobacteraceae	Helicobacter	Helicobacter pylori
85963.7	Helicobacter pylori J99	Bacteria	Proteobacteria	Epsilonproteobacteria	Campylobacterales	Helicobacteraceae	Helicobacter	Helicobacter pylori
86416.3	Clostridium pasteurianum BC1	Bacteria	Firmicutes	Clostridia	Clostridiales	Clostridiaceae	Clostridium	Clostridium pasteurianum
88431.987	Dorea longicatena DLSSTS7063	Bacteria	Firmicutes	Clostridia	Clostridiales	Lachnospiraceae	Dorea	Dorea longicatena
89014.60	Blautia luti SSTS_Bg7063_v2	Bacteria	Firmicutes	Clostridia	Clostridiales	Lachnospiraceae	Blautia	Blautia luti
93061.5	Staphylococcus aureus subsp. aureus NCTC 8325	Bacteria	Firmicutes	Bacilli	Bacillales	Staphylococcaceae	Staphylococcus	Staphylococcus aureus
93062.19	Staphylococcus aureus subsp. aureus COL	Bacteria	Firmicutes	Bacilli	Bacillales	Staphylococcaceae	Staphylococcus	Staphylococcus aureus
95658.5	Ureaplasma urealyticum serovar 4	Bacteria	Tenericutes	Mollicutes	Mycoplasmatales	Mycoplasmataceae	Ureaplasma	Ureaplasma urealyticum
95662.5	Ureaplasma urealyticum serovar 8	Bacteria	Tenericutes	Mollicutes	Mycoplasmatales	Mycoplasmataceae	Ureaplasma	Ureaplasma urealyticum
95663.5	Ureaplasma urealyticum serovar 9	Bacteria	Tenericutes	Mollicutes	Mycoplasmatales	Mycoplasmataceae	Ureaplasma	Ureaplasma urealyticum
95664.6	Ureaplasma urealyticum serovar 10	Bacteria	Tenericutes	Mollicutes	Mycoplasmatales	Mycoplasmataceae	Ureaplasma	Ureaplasma urealyticum
96563.4	Pseudomonas stutzeri ATCC 17588 = LMG 11199	Bacteria	Proteobacteria	Gammaproteobacteria	Pseudomonadales	Pseudomonadaceae	Pseudomonas	Pseudomonas stutzeri
97138.3	Clostridium sp. ASF356	Bacteria	Firmicutes	Clostridia	Clostridiales	Clostridiaceae	Clostridium	-
99287.12	Salmonella enterica subsp. enterica serovar Typhimurium str. LT2	Bacteria	Proteobacteria	Gammaproteobacteria	Enterobacterales	Enterobacteriaceae	Salmonella	Salmonella enterica
99822.23	Streptococcus dysgalactiae subsp. dysgalactiae strain NCTC4670	Bacteria	Firmicutes	Bacilli	Lactobacillales	Streptococcaceae	Streptococcus	Streptococcus dysgalactiae
99822.24	Streptococcus dysgalactiae subsp. dysgalactiae strain NCTC13731	Bacteria	Firmicutes	Bacilli	Lactobacillales	Streptococcaceae	Streptococcus	Streptococcus dysgalactiae
99822.25	Streptococcus dysgalactiae subsp. dysgalactiae strain NCTC4669	Bacteria	Firmicutes	Bacilli	Lactobacillales	Streptococcaceae	Streptococcus	Streptococcus dysgalactiae
103855.15	Bordetella hinzii strain F582	Bacteria	Proteobacteria	Betaproteobacteria	Burkholderiales	Alcaligenaceae	Bordetella	Bordetella hinzii
103892.3	Veillonella ratti LFYP33	Bacteria	Firmicutes	Negativicutes	Veillonellales	Veillonellaceae	Veillonella	Veillonella ratti
108980.15	Acinetobacter ursingii strain UBA1533	Bacteria	Proteobacteria	Gammaproteobacteria	Pseudomonadales	Moraxellaceae	Acinetobacter	Acinetobacter ursingii
108980.39	Acinetobacter ursingii strain M3	Bacteria	Proteobacteria	Gammaproteobacteria	Pseudomonadales	Moraxellaceae	Acinetobacter	Acinetobacter ursingii
108980.40	Acinetobacter ursingii BEED03	Bacteria	Proteobacteria	Gammaproteobacteria	Pseudomonadales	Moraxellaceae	Acinetobacter	Acinetobacter ursingii
135461.13	Bacillus subtilis subsp. subtilis	Bacteria	Firmicutes	Bacilli	Bacillales	Bacillaceae	Bacillus	Bacillus subtilis
138119.41	Desulfitobacterium hafniense Y51	Bacteria	Firmicutes	Clostridia	Clostridiales	Peptococcaceae	Desulfitobacterium	Desulfitobacterium hafniense
140626.3	Lachnobacterium bovis strain AE2004	Bacteria	Firmicutes	Clostridia	Clostridiales	Lachnospiraceae	Lachnobacterium	Lachnobacterium bovis
140626.5	Lachnobacterium bovis strain S1b	Bacteria	Firmicutes	Clostridia	Clostridiales	Lachnospiraceae	Lachnobacterium	Lachnobacterium bovis
147467.8	Staphylococcus sciuri subsp. sciuri strain DSM 20345	Bacteria	Firmicutes	Bacilli	Bacillales	Staphylococcaceae	Staphylococcus	Staphylococcus sciuri
154288.56	Turicibacter sanguinis strain DSM 14220	Bacteria	Firmicutes	Erysipelotrichia	Erysipelotrichales	Erysipelotrichaceae	Turicibacter	Turicibacter sanguinis
155864.8	Escherichia coli O157:H7 EDL933	Bacteria	Proteobacteria	Gammaproteobacteria	Enterobacterales	Enterobacteriaceae	Escherichia	Escherichia coli
158878.14	Staphylococcus aureus subsp. aureus Mu50	Bacteria	Firmicutes	Bacilli	Bacillales	Staphylococcaceae	Staphylococcus	Staphylococcus aureus
158879.11	Staphylococcus aureus subsp. aureus N315	Bacteria	Firmicutes	Bacilli	Bacillales	Staphylococcaceae	Staphylococcus	Staphylococcus aureus
159272.328	uncultured Prevotella sp. strain UMGS145	Bacteria	Bacteroidetes	Bacteroidia	Bacteroidales	Prevotellaceae	Prevotella	-
159272.333	uncultured Prevotella sp. strain UMGS278	Bacteria	Bacteroidetes	Bacteroidia	Bacteroidales	Prevotellaceae	Prevotella	-
159272.337	uncultured Prevotella sp. strain UMGS476	Bacteria	Bacteroidetes	Bacteroidia	Bacteroidales	Prevotellaceae	Prevotella	-
159272.338	uncultured Prevotella sp. strain UMGS490	Bacteria	Bacteroidetes	Bacteroidia	Bacteroidales	Prevotellaceae	Prevotella	-
159272.356	uncultured Prevotella sp. strain UMGS899	Bacteria	Bacteroidetes	Bacteroidia	Bacteroidales	Prevotellaceae	Prevotella	-
159272.392	uncultured Prevotella sp. strain UMGS1584	Bacteria	Bacteroidetes	Bacteroidia	Bacteroidales	Prevotellaceae	Prevotella	-
159272.402	uncultured Prevotella sp. strain UMGS1787	Bacteria	Bacteroidetes	Bacteroidia	Bacteroidales	Prevotellaceae	Prevotella	-
159272.813	uncultured Prevotella sp. P14C777_maxbin.010	Bacteria	Bacteroidetes	Bacteroidia	Bacteroidales	Prevotellaceae	Prevotella	-
159272.814	uncultured Prevotella sp. P06C777_maxbin.077	Bacteria	Bacteroidetes	Bacteroidia	Bacteroidales	Prevotellaceae	Prevotella	-
159272.815	uncultured Prevotella sp. P49C777_bin.001	Bacteria	Bacteroidetes	Bacteroidia	Bacteroidales	Prevotellaceae	Prevotella	-
159272.816	uncultured Prevotella sp. P38C777_maxbin.005	Bacteria	Bacteroidetes	Bacteroidia	Bacteroidales	Prevotellaceae	Prevotella	-
160488.4	Pseudomonas putida KT2440	Bacteria	Proteobacteria	Gammaproteobacteria	Pseudomonadales	Pseudomonadaceae	Pseudomonas	Pseudomonas putida
160490.1	Streptococcus pyogenes M1 GAS	Bacteria	Firmicutes	Bacilli	Lactobacillales	Streptococcaceae	Streptococcus	Streptococcus pyogenes
160491.19	Streptococcus pyogenes str. Manfredo	Bacteria	Firmicutes	Bacilli	Lactobacillales	Streptococcaceae	Streptococcus	Streptococcus pyogenes
161879.12	Corynebacterium kroppenstedtii strain DNF00591	Bacteria	Actinobacteria	Actinobacteria	Corynebacteriales	Corynebacteriaceae	Corynebacterium	Corynebacterium kroppenstedtii
165179.2419	Prevotella copri strain LMAG:60	Bacteria	Bacteroidetes	Bacteroidia	Bacteroidales	Prevotellaceae	Prevotella	Prevotella copri
165179.2420	Prevotella copri strain MGYG-HGUT-03697	Bacteria	Bacteroidetes	Bacteroidia	Bacteroidales	Prevotellaceae	Prevotella	Prevotella copri
165179.2440	Prevotella copri strain P2B-2	Bacteria	Bacteroidetes	Bacteroidia	Bacteroidales	Prevotellaceae	Prevotella	Prevotella copri
165179.2441	Prevotella copri strain P2A-3	Bacteria	Bacteroidetes	Bacteroidia	Bacteroidales	Prevotellaceae	Prevotella	Prevotella copri
165179.261	Prevotella copri iA622	Bacteria	Bacteroidetes	Bacteroidia	Bacteroidales	Prevotellaceae	Prevotella	Prevotella copri
165179.263	Prevotella copri iAA615	Bacteria	Bacteroidetes	Bacteroidia	Bacteroidales	Prevotellaceae	Prevotella	Prevotella copri
165179.283	Prevotella copri iAQ1179	Bacteria	Bacteroidetes	Bacteroidia	Bacteroidales	Prevotellaceae	Prevotella	Prevotella copri
165179.300	Prevotella copri iAQ1173	Bacteria	Bacteroidetes	Bacteroidia	Bacteroidales	Prevotellaceae	Prevotella	Prevotella copri
165179.304	Prevotella copri iAA917	Bacteria	Bacteroidetes	Bacteroidia	Bacteroidales	Prevotellaceae	Prevotella	Prevotella copri
165179.339	Prevotella copri iA624	Bacteria	Bacteroidetes	Bacteroidia	Bacteroidales	Prevotellaceae	Prevotella	Prevotella copri
165179.39	Prevotella copri strain Indica	Bacteria	Bacteroidetes	Bacteroidia	Bacteroidales	Prevotellaceae	Prevotella	Prevotella copri
165179.612	Prevotella copri PS131_S11	Bacteria	Bacteroidetes	Bacteroidia	Bacteroidales	Prevotellaceae	Prevotella	Prevotella copri
165187.27	uncultured Bifidobacterium sp. P17C666_maxbin.013	Bacteria	Actinobacteria	Actinobacteria	Bifidobacteriales	Bifidobacteriaceae	Bifidobacterium	-
166486.30	Roseburia intestinalis LFYP67	Bacteria	Firmicutes	Clostridia	Clostridiales	Lachnospiraceae	Roseburia	Roseburia intestinalis
169963.11	Listeria monocytogenes EGD-e	Bacteria	Firmicutes	Bacilli	Bacillales	Listeriaceae	Listeria	Listeria monocytogenes
170187.11	Streptococcus pneumoniae TIGR4	Bacteria	Firmicutes	Bacilli	Lactobacillales	Streptococcaceae	Streptococcus	Streptococcus pneumoniae
171101.6	Streptococcus pneumoniae R6	Bacteria	Firmicutes	Bacilli	Lactobacillales	Streptococcaceae	Streptococcus	Streptococcus pneumoniae
176279.9	Staphylococcus epidermidis RP62A	Bacteria	Firmicutes	Bacilli	Bacillales	Staphylococcaceae	Staphylococcus	Staphylococcus epidermidis
176280.1	Staphylococcus epidermidis ATCC 12228	Bacteria	Firmicutes	Bacilli	Bacillales	Staphylococcaceae	Staphylococcus	Staphylococcus epidermidis
176299.3	Agrobacterium tumefaciens str. C58	Bacteria	Proteobacteria	Alphaproteobacteria	Rhizobiales	Rhizobiaceae	Agrobacterium	Agrobacterium fabrum
180332.6	Robinsoniella peoriensis strain 6600698	Bacteria	Firmicutes	Clostridia	Clostridiales	Lachnospiraceae	Robinsoniella	Robinsoniella peoriensis
184870.3	Varibaculum cambriense strain DNF00696	Bacteria	Actinobacteria	Actinobacteria	Actinomycetales	Actinomycetaceae	Varibaculum	Varibaculum cambriense
186103.3	Streptococcus pyogenes MGAS8232	Bacteria	Firmicutes	Bacilli	Lactobacillales	Streptococcaceae	Streptococcus	Streptococcus pyogenes
186802.31	Clostridiales sp. LFYP113	Bacteria	Firmicutes	Clostridia	Clostridiales	-	-	-
188626.3	Dermacoccus sp. Ellin185	Bacteria	Actinobacteria	Actinobacteria	Micrococcales	Dermacoccaceae	Dermacoccus	-
189423.5	Streptococcus pneumoniae 670-6B	Bacteria	Firmicutes	Bacilli	Lactobacillales	Streptococcaceae	Streptococcus	Streptococcus pneumoniae
190304.8	Fusobacterium nucleatum subsp. nucleatum ATCC 25586	Bacteria	Fusobacteria	Fusobacteriia	Fusobacteriales	Fusobacteriaceae	Fusobacterium	Fusobacterium nucleatum
190764.68	uncultured Olsenella sp. strain UMGS1080	Bacteria	Actinobacteria	Coriobacteriia	Coriobacteriales	Atopobiaceae	Olsenella	-
192222.6	Campylobacter jejuni subsp. jejuni NCTC 11168	Bacteria	Proteobacteria	Epsilonproteobacteria	Campylobacterales	Campylobacteraceae	Campylobacter	Campylobacter jejuni
193567.3	Streptococcus pyogenes SSI-1	Bacteria	Firmicutes	Bacilli	Lactobacillales	Streptococcaceae	Streptococcus	Streptococcus pyogenes
195099.5	Campylobacter jejuni RM1221	Bacteria	Proteobacteria	Epsilonproteobacteria	Campylobacterales	Campylobacteraceae	Campylobacter	Campylobacter jejuni
195102.6	Clostridium perfringens str. 13	Bacteria	Firmicutes	Clostridia	Clostridiales	Clostridiaceae	Clostridium	Clostridium perfringens
195103.9	Clostridium perfringens ATCC 13124	Bacteria	Firmicutes	Clostridia	Clostridiales	Clostridiaceae	Clostridium	Clostridium perfringens
196164.6	Corynebacterium efficiens YS-314	Bacteria	Actinobacteria	Actinobacteria	Corynebacteriales	Corynebacteriaceae	Corynebacterium	Corynebacterium efficiens
196620.1	Staphylococcus aureus subsp. aureus MW2	Bacteria	Firmicutes	Bacilli	Bacillales	Staphylococcaceae	Staphylococcus	Staphylococcus aureus
197614.11	Streptococcus pasteurianus SS_Bg39_v2	Bacteria	Firmicutes	Bacilli	Lactobacillales	Streptococcaceae	Streptococcus	Streptococcus pasteurianus
198214.1	Shigella flexneri 2a str. 301	Bacteria	Proteobacteria	Gammaproteobacteria	Enterobacterales	Enterobacteriaceae	Shigella	Shigella flexneri
198215.1	Shigella flexneri 2a str. 2457T	Bacteria	Proteobacteria	Gammaproteobacteria	Enterobacterales	Enterobacteriaceae	Shigella	Shigella flexneri
198466.3	Streptococcus pyogenes MGAS315	Bacteria	Firmicutes	Bacilli	Lactobacillales	Streptococcaceae	Streptococcus	Streptococcus pyogenes
199310.1	Escherichia coli CFT073	Bacteria	Proteobacteria	Gammaproteobacteria	Enterobacterales	Enterobacteriaceae	Escherichia	Escherichia coli
203120.7	Leuconostoc mesenteroides subsp. mesenteroides ATCC 8293	Bacteria	Firmicutes	Bacilli	Lactobacillales	Leuconostocaceae	Leuconostoc	Leuconostoc mesenteroides
203267.6	Tropheryma whipplei str. Twist	Bacteria	Actinobacteria	Actinobacteria	Micrococcales	-	Tropheryma	Tropheryma whipplei
203275.8	Tannerella forsythia ATCC 43037	Bacteria	Bacteroidetes	Bacteroidia	Bacteroidales	Tannerellaceae	Tannerella	Tannerella forsythia
205913.6	Bifidobacterium longum subsp. longum DJO10A	Bacteria	Actinobacteria	Actinobacteria	Bifidobacteriales	Bifidobacteriaceae	Bifidobacterium	Bifidobacterium longum
205921.4	Streptococcus agalactiae A909	Bacteria	Firmicutes	Bacilli	Lactobacillales	Streptococcaceae	Streptococcus	Streptococcus agalactiae
205922.5	Pseudomonas fluorescens Pf0-1	Bacteria	Proteobacteria	Gammaproteobacteria	Pseudomonadales	Pseudomonadaceae	Pseudomonas	Pseudomonas fluorescens
206672.9	Bifidobacterium longum subsp. longum NCC2705	Bacteria	Actinobacteria	Actinobacteria	Bifidobacteriales	Bifidobacteriaceae	Bifidobacterium	Bifidobacterium longum
207559.7	Desulfovibrio desulfuricans subsp. desulfuricans str. G20	Bacteria	Proteobacteria	Deltaproteobacteria	Desulfovibrionales	Desulfovibrionaceae	Desulfovibrio	Desulfovibrio alaskensis
208435.3	Streptococcus agalactiae 2603V/R	Bacteria	Firmicutes	Bacilli	Lactobacillales	Streptococcaceae	Streptococcus	Streptococcus agalactiae
208962.36	Escherichia albertii strain EC06-170	Bacteria	Proteobacteria	Gammaproteobacteria	Enterobacterales	Enterobacteriaceae	Escherichia	Escherichia albertii
208963.12	Pseudomonas aeruginosa UCBPP-PA14	Bacteria	Proteobacteria	Gammaproteobacteria	Pseudomonadales	Pseudomonadaceae	Pseudomonas	Pseudomonas aeruginosa
208964.1	Pseudomonas aeruginosa PAO1	Bacteria	Proteobacteria	Gammaproteobacteria	Pseudomonadales	Pseudomonadaceae	Pseudomonas	Pseudomonas aeruginosa
209261.1	Salmonella enterica subsp. enterica serovar Typhi Ty2	Bacteria	Proteobacteria	Gammaproteobacteria	Enterobacterales	Enterobacteriaceae	Salmonella	Salmonella enterica
210007.1	Streptococcus mutans UA159	Bacteria	Firmicutes	Bacilli	Lactobacillales	Streptococcaceae	Streptococcus	Streptococcus mutans
211110.1	Streptococcus agalactiae NEM316	Bacteria	Firmicutes	Bacilli	Lactobacillales	Streptococcaceae	Streptococcus	Streptococcus agalactiae
213810.11	Ruminococcus champanellensis 18P13 = JCM 17042	Bacteria	Firmicutes	Clostridia	Clostridiales	Ruminococcaceae	Ruminococcus	Ruminococcus champanellensis
213810.4	Ruminococcus sp. 18P13	Bacteria	Firmicutes	Clostridia	Clostridiales	Ruminococcaceae	Ruminococcus	Ruminococcus champanellensis
216592.3	Escherichia coli 042	Bacteria	Proteobacteria	Gammaproteobacteria	Enterobacterales	Enterobacteriaceae	Escherichia	Escherichia coli
216595.4	Pseudomonas fluorescens SBW25	Bacteria	Proteobacteria	Gammaproteobacteria	Pseudomonadales	Pseudomonadaceae	Pseudomonas	Pseudomonas fluorescens
216597.6	Salmonella enterica subsp. enterica serovar Typhimurium str. SL1344	Bacteria	Proteobacteria	Gammaproteobacteria	Enterobacterales	Enterobacteriaceae	Salmonella	Salmonella enterica
216599.12	Shigella sonnei 53G	Bacteria	Proteobacteria	Gammaproteobacteria	Enterobacterales	Enterobacteriaceae	Shigella	Shigella sonnei
216600.3	Streptococcus pneumoniae 23F	Bacteria	Firmicutes	Bacilli	Lactobacillales	Streptococcaceae	Streptococcus	Streptococcus pneumoniae
216816.107	Bifidobacterium longum subsp. longum 105-A	Bacteria	Actinobacteria	Actinobacteria	Bifidobacteriales	Bifidobacteriaceae	Bifidobacterium	Bifidobacterium longum
216816.111	Bifidobacterium longum subsp. suis BXY01	Bacteria	Actinobacteria	Actinobacteria	Bifidobacteriales	Bifidobacteriaceae	Bifidobacterium	Bifidobacterium longum
216816.113	Bifidobacterium scardovii 981_BLON	Bacteria	Actinobacteria	Actinobacteria	Bifidobacteriales	Bifidobacteriaceae	Bifidobacterium	Bifidobacterium scardovii
216816.114	Bifidobacterium longum subsp. longum BG7	Bacteria	Actinobacteria	Actinobacteria	Bifidobacteriales	Bifidobacteriaceae	Bifidobacterium	Bifidobacterium longum
216816.115	Bifidobacterium longum subsp. longum CMW7750	Bacteria	Actinobacteria	Actinobacteria	Bifidobacteriales	Bifidobacteriaceae	Bifidobacterium	Bifidobacterium longum
216816.117	Bifidobacterium longum subsp. longum 379	Bacteria	Actinobacteria	Actinobacteria	Bifidobacteriales	Bifidobacteriaceae	Bifidobacterium	Bifidobacterium longum
216816.126	Bifidobacterium longum subsp. longum 35624	Bacteria	Actinobacteria	Actinobacteria	Bifidobacteriales	Bifidobacteriaceae	Bifidobacterium	Bifidobacterium longum
216816.127	Bifidobacterium longum subsp. suis Su859	Bacteria	Actinobacteria	Actinobacteria	Bifidobacteriales	Bifidobacteriaceae	Bifidobacterium	Bifidobacterium longum
216816.128	Bifidobacterium longum subsp. longum DSM 20219	Bacteria	Actinobacteria	Actinobacteria	Bifidobacteriales	Bifidobacteriaceae	Bifidobacterium	Bifidobacterium longum
216816.143	Bifidobacterium longum subsp. longum 1898B	Bacteria	Actinobacteria	Actinobacteria	Bifidobacteriales	Bifidobacteriaceae	Bifidobacterium	Bifidobacterium longum
216816.144	Bifidobacterium longum subsp. LFYP 1897B	Bacteria	Actinobacteria	Actinobacteria	Bifidobacteriales	Bifidobacteriaceae	Bifidobacterium	Bifidobacterium longum
216816.145	Bifidobacterium longum subsp. longum 1890B	Bacteria	Actinobacteria	Actinobacteria	Bifidobacteriales	Bifidobacteriaceae	Bifidobacterium	Bifidobacterium longum
216816.146	Bifidobacterium longum subsp. longum 1886B	Bacteria	Actinobacteria	Actinobacteria	Bifidobacteriales	Bifidobacteriaceae	Bifidobacterium	Bifidobacterium longum
216816.147	Bifidobacterium longum subsp. longum Indica	Bacteria	Actinobacteria	Actinobacteria	Bifidobacteriales	Bifidobacteriaceae	Bifidobacterium	Bifidobacterium longum
216816.167	Bifidobacterium longum subsp. longum DPC6317	Bacteria	Actinobacteria	Actinobacteria	Bifidobacteriales	Bifidobacteriaceae	Bifidobacterium	Bifidobacterium longum
216816.168	Bifidobacterium longum subsp. longum APC1504	Bacteria	Actinobacteria	Actinobacteria	Bifidobacteriales	Bifidobacteriaceae	Bifidobacterium	Bifidobacterium longum
216816.169	Bifidobacterium longum subsp. longum APC1503	Bacteria	Actinobacteria	Actinobacteria	Bifidobacteriales	Bifidobacteriaceae	Bifidobacterium	Bifidobacterium longum
216816.170	Bifidobacterium longum subsp. longum DPC6321	Bacteria	Actinobacteria	Actinobacteria	Bifidobacteriales	Bifidobacteriaceae	Bifidobacterium	Bifidobacterium longum
216816.171	Bifidobacterium longum subsp. longum DPC6316	Bacteria	Actinobacteria	Actinobacteria	Bifidobacteriales	Bifidobacteriaceae	Bifidobacterium	Bifidobacterium longum
216816.172	Bifidobacterium longum subsp. longum APC1482	Bacteria	Actinobacteria	Actinobacteria	Bifidobacteriales	Bifidobacteriaceae	Bifidobacterium	Bifidobacterium longum
216816.173	Bifidobacterium longum subsp. longum APC1478	Bacteria	Actinobacteria	Actinobacteria	Bifidobacteriales	Bifidobacteriaceae	Bifidobacterium	Bifidobacterium longum
216816.174	Bifidobacterium longum subsp. longum APC1480	Bacteria	Actinobacteria	Actinobacteria	Bifidobacteriales	Bifidobacteriaceae	Bifidobacterium	Bifidobacterium longum
216816.175	Bifidobacterium longum subsp. longum APC1477	Bacteria	Actinobacteria	Actinobacteria	Bifidobacteriales	Bifidobacteriaceae	Bifidobacterium	Bifidobacterium longum
216816.176	Bifidobacterium longum subsp. longum APC1472	Bacteria	Actinobacteria	Actinobacteria	Bifidobacteriales	Bifidobacteriaceae	Bifidobacterium	Bifidobacterium longum
216816.177	Bifidobacterium longum subsp. longum APC1473	Bacteria	Actinobacteria	Actinobacteria	Bifidobacteriales	Bifidobacteriaceae	Bifidobacterium	Bifidobacterium longum
216816.178	Bifidobacterium longum subsp. longum APC1468	Bacteria	Actinobacteria	Actinobacteria	Bifidobacteriales	Bifidobacteriaceae	Bifidobacterium	Bifidobacterium longum
216816.179	Bifidobacterium longum subsp. longum APC1465	Bacteria	Actinobacteria	Actinobacteria	Bifidobacteriales	Bifidobacteriaceae	Bifidobacterium	Bifidobacterium longum
216816.180	Bifidobacterium longum subsp. longum APC1464	Bacteria	Actinobacteria	Actinobacteria	Bifidobacteriales	Bifidobacteriaceae	Bifidobacterium	Bifidobacterium longum
216816.181	Bifidobacterium longum subsp. longum APC1462	Bacteria	Actinobacteria	Actinobacteria	Bifidobacteriales	Bifidobacteriaceae	Bifidobacterium	Bifidobacterium longum
216816.182	Bifidobacterium longum subsp. longum DPC6323	Bacteria	Actinobacteria	Actinobacteria	Bifidobacteriales	Bifidobacteriaceae	Bifidobacterium	Bifidobacterium longum
216816.183	Bifidobacterium longum subsp. longum DPC6320	Bacteria	Actinobacteria	Actinobacteria	Bifidobacteriales	Bifidobacteriaceae	Bifidobacterium	Bifidobacterium longum
216816.184	Bifidobacterium longum subsp. longum APC1476	Bacteria	Actinobacteria	Actinobacteria	Bifidobacteriales	Bifidobacteriaceae	Bifidobacterium	Bifidobacterium longum
216816.185	Bifidobacterium longum subsp. longum APC1466	Bacteria	Actinobacteria	Actinobacteria	Bifidobacteriales	Bifidobacteriaceae	Bifidobacterium	Bifidobacterium longum
216816.186	Bifidobacterium longum subsp. suis APC1461	Bacteria	Actinobacteria	Actinobacteria	Bifidobacteriales	Bifidobacteriaceae	Bifidobacterium	Bifidobacterium longum
216816.222	Bifidobacterium longum subsp. longum UMB0788	Bacteria	Actinobacteria	Actinobacteria	Bifidobacteriales	Bifidobacteriaceae	Bifidobacterium	Bifidobacterium longum
216816.224	Bifidobacterium longum subsp. longum DS7_3	Bacteria	Actinobacteria	Actinobacteria	Bifidobacteriales	Bifidobacteriaceae	Bifidobacterium	Bifidobacterium longum
216816.225	Bifidobacterium longum subsp. longum DS1_3	Bacteria	Actinobacteria	Actinobacteria	Bifidobacteriales	Bifidobacteriaceae	Bifidobacterium	Bifidobacterium longum
216816.226	Bifidobacterium longum subsp. longum DS18_3	Bacteria	Actinobacteria	Actinobacteria	Bifidobacteriales	Bifidobacteriaceae	Bifidobacterium	Bifidobacterium longum
216816.227	Bifidobacterium longum subsp. longum DS15_3	Bacteria	Actinobacteria	Actinobacteria	Bifidobacteriales	Bifidobacteriaceae	Bifidobacterium	Bifidobacterium longum
216816.228	Bifidobacterium longum subsp. longum DS9_3	Bacteria	Actinobacteria	Actinobacteria	Bifidobacteriales	Bifidobacteriaceae	Bifidobacterium	Bifidobacterium longum
216816.254	Bifidobacterium longum subsp. longum N3A01	Bacteria	Actinobacteria	Actinobacteria	Bifidobacteriales	Bifidobacteriaceae	Bifidobacterium	Bifidobacterium longum
216816.255	Bifidobacterium longum subsp. longum N6D05	Bacteria	Actinobacteria	Actinobacteria	Bifidobacteriales	Bifidobacteriaceae	Bifidobacterium	Bifidobacterium longum
216816.256	Bifidobacterium longum subsp. longum N2G10	Bacteria	Actinobacteria	Actinobacteria	Bifidobacteriales	Bifidobacteriaceae	Bifidobacterium	Bifidobacterium longum
216816.257	Bifidobacterium longum subsp. longum N2F05	Bacteria	Actinobacteria	Actinobacteria	Bifidobacteriales	Bifidobacteriaceae	Bifidobacterium	Bifidobacterium longum
216816.258	Bifidobacterium longum subsp. longum N2E12	Bacteria	Actinobacteria	Actinobacteria	Bifidobacteriales	Bifidobacteriaceae	Bifidobacterium	Bifidobacterium longum
216816.259	Bifidobacterium longum subsp. longum W35-1	Bacteria	Actinobacteria	Actinobacteria	Bifidobacteriales	Bifidobacteriaceae	Bifidobacterium	Bifidobacterium longum
216816.260	Bifidobacterium longum subsp. longum N5E04	Bacteria	Actinobacteria	Actinobacteria	Bifidobacteriales	Bifidobacteriaceae	Bifidobacterium	Bifidobacterium longum
216816.261	Bifidobacterium longum subsp. longum N3E01-2	Bacteria	Actinobacteria	Actinobacteria	Bifidobacteriales	Bifidobacteriaceae	Bifidobacterium	Bifidobacterium longum
216816.262	Bifidobacterium longum subsp. LFYP 239-2	Bacteria	Actinobacteria	Actinobacteria	Bifidobacteriales	Bifidobacteriaceae	Bifidobacterium	Bifidobacterium longum
216816.263	Bifidobacterium longum subsp. longum TM04-17	Bacteria	Actinobacteria	Actinobacteria	Bifidobacteriales	Bifidobacteriaceae	Bifidobacterium	Bifidobacterium longum
216816.264	Bifidobacterium longum subsp. longum TM02-7	Bacteria	Actinobacteria	Actinobacteria	Bifidobacteriales	Bifidobacteriaceae	Bifidobacterium	Bifidobacterium longum
216816.265	Bifidobacterium longum subsp. longum TF07-39	Bacteria	Actinobacteria	Actinobacteria	Bifidobacteriales	Bifidobacteriaceae	Bifidobacterium	Bifidobacterium longum
216816.266	Bifidobacterium longum subsp. longum TF07-31	Bacteria	Actinobacteria	Actinobacteria	Bifidobacteriales	Bifidobacteriaceae	Bifidobacterium	Bifidobacterium longum
216816.267	Bifidobacterium longum subsp. longum TF07-34	Bacteria	Actinobacteria	Actinobacteria	Bifidobacteriales	Bifidobacteriaceae	Bifidobacterium	Bifidobacterium longum
216816.268	Bifidobacterium longum subsp. longum TM01-1	Bacteria	Actinobacteria	Actinobacteria	Bifidobacteriales	Bifidobacteriaceae	Bifidobacterium	Bifidobacterium longum
216816.269	Bifidobacterium longum subsp. longum TF08-4AC	Bacteria	Actinobacteria	Actinobacteria	Bifidobacteriales	Bifidobacteriaceae	Bifidobacterium	Bifidobacterium longum
216816.270	Bifidobacterium longum subsp. longum TF06-45A	Bacteria	Actinobacteria	Actinobacteria	Bifidobacteriales	Bifidobacteriaceae	Bifidobacterium	Bifidobacterium longum
216816.271	Bifidobacterium longum subsp. longum TF01-22	Bacteria	Actinobacteria	Actinobacteria	Bifidobacteriales	Bifidobacteriaceae	Bifidobacterium	Bifidobacterium longum
216816.272	Bifidobacterium longum subsp. longum OM05-2BH	Bacteria	Actinobacteria	Actinobacteria	Bifidobacteriales	Bifidobacteriaceae	Bifidobacterium	Bifidobacterium longum
216816.273	Bifidobacterium longum subsp. longum TF06-12AC	Bacteria	Actinobacteria	Actinobacteria	Bifidobacteriales	Bifidobacteriaceae	Bifidobacterium	Bifidobacterium longum
216816.274	Bifidobacterium longum subsp. longum AF27-1BH	Bacteria	Actinobacteria	Actinobacteria	Bifidobacteriales	Bifidobacteriaceae	Bifidobacterium	Bifidobacterium longum
216816.275	Bifidobacterium longum subsp. longum AF26-10	Bacteria	Actinobacteria	Actinobacteria	Bifidobacteriales	Bifidobacteriaceae	Bifidobacterium	Bifidobacterium longum
216816.276	Bifidobacterium longum subsp. longum OF01-16	Bacteria	Actinobacteria	Actinobacteria	Bifidobacteriales	Bifidobacteriaceae	Bifidobacterium	Bifidobacterium longum
216816.277	Bifidobacterium longum subsp. longum AF14-34	Bacteria	Actinobacteria	Actinobacteria	Bifidobacteriales	Bifidobacteriaceae	Bifidobacterium	Bifidobacterium longum
216816.278	Bifidobacterium longum subsp. longum AF14-22	Bacteria	Actinobacteria	Actinobacteria	Bifidobacteriales	Bifidobacteriaceae	Bifidobacterium	Bifidobacterium longum
216816.279	Bifidobacterium longum subsp. longum AF13-41	Bacteria	Actinobacteria	Actinobacteria	Bifidobacteriales	Bifidobacteriaceae	Bifidobacterium	Bifidobacterium longum
216816.280	Bifidobacterium longum subsp. longum AF11-41	Bacteria	Actinobacteria	Actinobacteria	Bifidobacteriales	Bifidobacteriaceae	Bifidobacterium	Bifidobacterium longum
216816.281	Bifidobacterium longum subsp. longum AF13-34	Bacteria	Actinobacteria	Actinobacteria	Bifidobacteriales	Bifidobacteriaceae	Bifidobacterium	Bifidobacterium longum
216816.282	Bifidobacterium longum subsp. longum AF11-12	Bacteria	Actinobacteria	Actinobacteria	Bifidobacteriales	Bifidobacteriaceae	Bifidobacterium	Bifidobacterium longum
216816.283	Bifidobacterium longum subsp. longum AF08-2	Bacteria	Actinobacteria	Actinobacteria	Bifidobacteriales	Bifidobacteriaceae	Bifidobacterium	Bifidobacterium longum
216816.284	Bifidobacterium longum subsp. longum AF05-2	Bacteria	Actinobacteria	Actinobacteria	Bifidobacteriales	Bifidobacteriaceae	Bifidobacterium	Bifidobacterium longum
216816.285	Bifidobacterium longum subsp. longum AF05-16	Bacteria	Actinobacteria	Actinobacteria	Bifidobacteriales	Bifidobacteriaceae	Bifidobacterium	Bifidobacterium longum
216816.286	Bifidobacterium longum subsp. longum AF04-13	Bacteria	Actinobacteria	Actinobacteria	Bifidobacteriales	Bifidobacteriaceae	Bifidobacterium	Bifidobacterium longum
216816.287	Bifidobacterium longum subsp. longum AF03-27	Bacteria	Actinobacteria	Actinobacteria	Bifidobacteriales	Bifidobacteriaceae	Bifidobacterium	Bifidobacterium longum
216816.288	Bifidobacterium longum subsp. longum AF03-20	Bacteria	Actinobacteria	Actinobacteria	Bifidobacteriales	Bifidobacteriaceae	Bifidobacterium	Bifidobacterium longum
216816.289	Bifidobacterium longum subsp. longum AF03-10	Bacteria	Actinobacteria	Actinobacteria	Bifidobacteriales	Bifidobacteriaceae	Bifidobacterium	Bifidobacterium longum
216816.290	Bifidobacterium longum subsp. longum TM06-1	Bacteria	Actinobacteria	Actinobacteria	Bifidobacteriales	Bifidobacteriaceae	Bifidobacterium	Bifidobacterium longum
216816.291	Bifidobacterium longum subsp. longum TM05-14	Bacteria	Actinobacteria	Actinobacteria	Bifidobacteriales	Bifidobacteriaceae	Bifidobacterium	Bifidobacterium longum
216816.292	Bifidobacterium longum subsp. longum TM04-48B	Bacteria	Actinobacteria	Actinobacteria	Bifidobacteriales	Bifidobacteriaceae	Bifidobacterium	Bifidobacterium longum
216816.293	Bifidobacterium longum subsp. longum AM39-8AC	Bacteria	Actinobacteria	Actinobacteria	Bifidobacteriales	Bifidobacteriaceae	Bifidobacterium	Bifidobacterium longum
216816.294	Bifidobacterium longum subsp. longum AM34-3	Bacteria	Actinobacteria	Actinobacteria	Bifidobacteriales	Bifidobacteriaceae	Bifidobacterium	Bifidobacterium longum
216816.295	Bifidobacterium longum subsp. longum AM42-13AT	Bacteria	Actinobacteria	Actinobacteria	Bifidobacteriales	Bifidobacteriaceae	Bifidobacterium	Bifidobacterium longum
216816.296	Bifidobacterium longum subsp. longum AM39-10AC	Bacteria	Actinobacteria	Actinobacteria	Bifidobacteriales	Bifidobacteriaceae	Bifidobacterium	Bifidobacterium longum
216816.297	Bifidobacterium longum subsp. longum AM31-13LB	Bacteria	Actinobacteria	Actinobacteria	Bifidobacteriales	Bifidobacteriaceae	Bifidobacterium	Bifidobacterium longum
216816.298	Bifidobacterium longum subsp. longum AM30-9LB	Bacteria	Actinobacteria	Actinobacteria	Bifidobacteriales	Bifidobacteriaceae	Bifidobacterium	Bifidobacterium longum
216816.299	Bifidobacterium longum subsp. longum AM21-20	Bacteria	Actinobacteria	Actinobacteria	Bifidobacteriales	Bifidobacteriaceae	Bifidobacterium	Bifidobacterium longum
216816.300	Bifidobacterium longum subsp. longum AM20-3	Bacteria	Actinobacteria	Actinobacteria	Bifidobacteriales	Bifidobacteriaceae	Bifidobacterium	Bifidobacterium longum
216816.301	Bifidobacterium longum subsp. longum AM20-39	Bacteria	Actinobacteria	Actinobacteria	Bifidobacteriales	Bifidobacteriaceae	Bifidobacterium	Bifidobacterium longum
216816.302	Bifidobacterium longum subsp. longum AM20-19AC	Bacteria	Actinobacteria	Actinobacteria	Bifidobacteriales	Bifidobacteriaceae	Bifidobacterium	Bifidobacterium longum
216816.303	Bifidobacterium longum subsp. longum AM16-2	Bacteria	Actinobacteria	Actinobacteria	Bifidobacteriales	Bifidobacteriaceae	Bifidobacterium	Bifidobacterium longum
216816.304	Bifidobacterium longum subsp. longum AM12-16	Bacteria	Actinobacteria	Actinobacteria	Bifidobacteriales	Bifidobacteriaceae	Bifidobacterium	Bifidobacterium longum
216816.305	Bifidobacterium longum subsp. longum AM11-2	Bacteria	Actinobacteria	Actinobacteria	Bifidobacteriales	Bifidobacteriaceae	Bifidobacterium	Bifidobacterium longum
216816.306	Bifidobacterium longum subsp. longum AM10-15B	Bacteria	Actinobacteria	Actinobacteria	Bifidobacteriales	Bifidobacteriaceae	Bifidobacterium	Bifidobacterium longum
216816.307	Bifidobacterium longum subsp. longum AM11-5	Bacteria	Actinobacteria	Actinobacteria	Bifidobacteriales	Bifidobacteriaceae	Bifidobacterium	Bifidobacterium longum
216816.308	Bifidobacterium longum subsp. longum AF36-1	Bacteria	Actinobacteria	Actinobacteria	Bifidobacteriales	Bifidobacteriaceae	Bifidobacterium	Bifidobacterium longum
216816.309	Bifidobacterium longum subsp. longum AF35-13AC	Bacteria	Actinobacteria	Actinobacteria	Bifidobacteriales	Bifidobacteriaceae	Bifidobacterium	Bifidobacterium longum
216816.310	Bifidobacterium longum subsp. longum AF34-9AC	Bacteria	Actinobacteria	Actinobacteria	Bifidobacteriales	Bifidobacteriaceae	Bifidobacterium	Bifidobacterium longum
216816.311	Bifidobacterium longum subsp. longum AF30-12	Bacteria	Actinobacteria	Actinobacteria	Bifidobacteriales	Bifidobacteriaceae	Bifidobacterium	Bifidobacterium longum
216816.312	Bifidobacterium longum subsp. longum AF30-11	Bacteria	Actinobacteria	Actinobacteria	Bifidobacteriales	Bifidobacteriaceae	Bifidobacterium	Bifidobacterium longum
216816.315	Bifidobacterium longum subsp. longum 1	Bacteria	Actinobacteria	Actinobacteria	Bifidobacteriales	Bifidobacteriaceae	Bifidobacterium	Bifidobacterium longum
216816.324	Bifidobacterium longum subsp. longum ICIS-505	Bacteria	Actinobacteria	Actinobacteria	Bifidobacteriales	Bifidobacteriaceae	Bifidobacterium	Bifidobacterium longum
216816.359	Bifidobacterium longum subsp. longum NCTC11818	Bacteria	Actinobacteria	Actinobacteria	Bifidobacteriales	Bifidobacteriaceae	Bifidobacterium	Bifidobacterium longum
216816.368	Bifidobacterium longum subsp. infantis JG_Bg463_m5_93	Bacteria	Actinobacteria	Actinobacteria	Bifidobacteriales	Bifidobacteriaceae	Bifidobacterium	Bifidobacterium longum
216816.378	Bifidobacterium longum subsp. suis BEED06	Bacteria	Actinobacteria	Actinobacteria	Bifidobacteriales	Bifidobacteriaceae	Bifidobacterium	Bifidobacterium longum
218495.5	Streptococcus uberis 0140J	Bacteria	Firmicutes	Bacilli	Lactobacillales	Streptococcaceae	Streptococcus	Streptococcus uberis
218496.4	Tropheryma whipplei TW08/27	Bacteria	Actinobacteria	Actinobacteria	Micrococcales	-	Tropheryma	Tropheryma whipplei
218538.1051	Dialister invisus strain P2A-1	Bacteria	Firmicutes	Negativicutes	Veillonellales	Veillonellaceae	Dialister	Dialister invisus
220664.3	Pseudomonas fluorescens Pf-5	Bacteria	Proteobacteria	Gammaproteobacteria	Pseudomonadales	Pseudomonadaceae	Pseudomonas	Pseudomonas protegens
220668.1	Lactobacillus plantarum WCFS1	Bacteria	Firmicutes	Bacilli	Lactobacillales	Lactobacillaceae	Lactobacillus	Lactobacillus plantarum
222523.1	Bacillus cereus ATCC 10987	Bacteria	Firmicutes	Bacilli	Bacillales	Bacillaceae	Bacillus	Bacillus cereus
223926.1	Vibrio parahaemolyticus RIMD 2210633	Bacteria	Proteobacteria	Gammaproteobacteria	Vibrionales	Vibrionaceae	Vibrio	Vibrio harveyi
224308.1	Bacillus subtilis subsp. subtilis str. 168	Bacteria	Firmicutes	Bacilli	Bacillales	Bacillaceae	Bacillus	Bacillus subtilis
224911.1	Bradyrhizobium japonicum USDA 110	Bacteria	Proteobacteria	Alphaproteobacteria	Rhizobiales	Bradyrhizobiaceae	Bradyrhizobium	Bradyrhizobium diazoefficiens
226185.1	Enterococcus faecalis V583	Bacteria	Firmicutes	Bacilli	Lactobacillales	Enterococcaceae	Enterococcus	Enterococcus faecalis
226186.1	Bacteroides thetaiotaomicron VPI-5482	Bacteria	Bacteroidetes	Bacteroidia	Bacteroidales	Bacteroidaceae	Bacteroides	Bacteroides thetaiotaomicron
226900.1	Bacillus cereus ATCC 14579	Bacteria	Firmicutes	Bacilli	Bacillales	Bacillaceae	Bacillus	Bacillus cereus
228399.5	Actinobacillus pleuropneumoniae serovar 1 str. 4074	Bacteria	Proteobacteria	Gammaproteobacteria	Pasteurellales	Pasteurellaceae	Actinobacillus	Actinobacillus pleuropneumoniae
228604.116	Prevotella salivae strain MGYG-HGUT-01360	Bacteria	Bacteroidetes	Bacteroidia	Bacteroidales	Prevotellaceae	Prevotella	Prevotella salivae
231023.4	Pseudomonas putida ND6	Bacteria	Proteobacteria	Gammaproteobacteria	Pseudomonadales	Pseudomonadaceae	Pseudomonas	Pseudomonas putida
234621.6	Rhodococcus erythropolis PR4	Bacteria	Actinobacteria	Actinobacteria	Corynebacteriales	Nocardiaceae	Rhodococcus	Rhodococcus erythropolis
239935.19	Akkermansia muciniphila YL44	Bacteria	Verrucomicrobia	Verrucomicrobiae	Verrucomicrobiales	Akkermansiaceae	Akkermansia	Akkermansia muciniphila
239935.4	Akkermansia muciniphila strain Urmite	Bacteria	Verrucomicrobia	Verrucomicrobiae	Verrucomicrobiales	Akkermansiaceae	Akkermansia	Akkermansia muciniphila
242619.1	Porphyromonas gingivalis W83	Bacteria	Bacteroidetes	Bacteroidia	Bacteroidales	Porphyromonadaceae	Porphyromonas	Porphyromonas gingivalis
243243.7	Mycobacterium avium 104	Bacteria	Actinobacteria	Actinobacteria	Corynebacteriales	Mycobacteriaceae	Mycobacterium	Mycobacterium avium
245012.3	butyrate-producing bacterium SM4/1	Bacteria	Firmicutes	Clostridia	Clostridiales	Lachnospiraceae	-	-
245014.3	butyrate-producing bacterium SS3/4	Bacteria	Firmicutes	Clostridia	Clostridiales	Lachnospiraceae	-	-
245018.3	butyrate-producing bacterium SSC/2	Bacteria	Firmicutes	Clostridia	Clostridiales	Lachnospiraceae	Anaerostipes	Anaerostipes hadrus
246198.10	Prevotella intermedia 17	Bacteria	Bacteroidetes	Bacteroidia	Bacteroidales	Prevotellaceae	Prevotella	Prevotella intermedia
246199.4	Ruminococcus albus 8	Bacteria	Firmicutes	Clostridia	Clostridiales	Ruminococcaceae	Ruminococcus	Ruminococcus albus
246201.1	Streptococcus mitis NCTC 12261	Bacteria	Firmicutes	Bacilli	Lactobacillales	Streptococcaceae	Streptococcus	Streptococcus mitis
246787.4	Bacteroides cellulosilyticus strain WH2	Bacteria	Bacteroidetes	Bacteroidia	Bacteroidales	Bacteroidaceae	Bacteroides	Bacteroides cellulosilyticus
253257.3	[Clostridium] amygdalinum strain src4	Bacteria	Firmicutes	Clostridia	Clostridiales	Lachnospiraceae	Lachnoclostridium	[Clostridium] amygdalinum
257314.1	Lactobacillus johnsonii NCC 533	Bacteria	Firmicutes	Bacilli	Lactobacillales	Lactobacillaceae	Lactobacillus	Lactobacillus johnsonii
260554.3	[Brevibacterium] halotolerans strain ATCC 25096	Bacteria	Firmicutes	Bacilli	Bacillales	Bacillaceae	Bacillus	Bacillus mojavensis
262316.1	Mycobacterium avium subsp. paratuberculosis str. k10	Bacteria	Actinobacteria	Actinobacteria	Corynebacteriales	Mycobacteriaceae	Mycobacterium	Mycobacterium avium
262727.7	Haemophilus influenzae R2846	Bacteria	Proteobacteria	Gammaproteobacteria	Pasteurellales	Pasteurellaceae	Haemophilus	Haemophilus influenzae
262728.5	Haemophilus influenzae R2866	Bacteria	Proteobacteria	Gammaproteobacteria	Pasteurellales	Pasteurellaceae	Haemophilus	Haemophilus influenzae
264199.4	Streptococcus thermophilus LMG 18311	Bacteria	Firmicutes	Bacilli	Lactobacillales	Streptococcaceae	Streptococcus	Streptococcus thermophilus
264731.4	Prevotella ruminicola 23	Bacteria	Bacteroidetes	Bacteroidia	Bacteroidales	Prevotellaceae	Prevotella	Prevotella ruminicola
265669.9	Listeria monocytogenes str. 4b F2365	Bacteria	Firmicutes	Bacilli	Bacillales	Listeriaceae	Listeria	Listeria monocytogenes
266264.4	Cupriavidus metallidurans CH34	Bacteria	Proteobacteria	Betaproteobacteria	Burkholderiales	Burkholderiaceae	Cupriavidus	Cupriavidus metallidurans
266835.9	Mesorhizobium loti MAFF303099	Bacteria	Proteobacteria	Alphaproteobacteria	Rhizobiales	Phyllobacteriaceae	Mesorhizobium	Mesorhizobium japonicum
267409.1	Listeria monocytogenes str. 1/2a F6854	Bacteria	Firmicutes	Bacilli	Bacillales	Listeriaceae	Listeria	Listeria monocytogenes
267410.1	Listeria monocytogenes str. 4b H7858	Bacteria	Firmicutes	Bacilli	Bacillales	Listeriaceae	Listeria	Listeria monocytogenes
267747.1	Propionibacterium acnes KPA171202	Bacteria	Actinobacteria	Actinobacteria	Propionibacteriales	Propionibacteriaceae	Cutibacterium	Cutibacterium acnes
269483.3	Burkholderia cepacia R18194	Bacteria	Proteobacteria	Betaproteobacteria	Burkholderiales	Burkholderiaceae	Burkholderia	Burkholderia lata
269796.9	Rhodospirillum rubrum ATCC 11170	Bacteria	Proteobacteria	Alphaproteobacteria	Rhodospirillales	Rhodospirillaceae	Rhodospirillum	Rhodospirillum rubrum
269801.10	Bacillus cereus G9241	Bacteria	Firmicutes	Bacilli	Bacillales	Bacillaceae	Bacillus	Bacillus cereus
272558.8	Bacillus halodurans C-125	Bacteria	Firmicutes	Bacilli	Bacillales	Bacillaceae	Bacillus	Bacillus halodurans
272559.17	Bacteroides fragilis NCTC 9343	Bacteria	Bacteroidetes	Bacteroidia	Bacteroidales	Bacteroidaceae	Bacteroides	Bacteroides fragilis
272562.8	Clostridium acetobutylicum ATCC 824	Bacteria	Firmicutes	Clostridia	Clostridiales	Clostridiaceae	Clostridium	Clostridium acetobutylicum
272563.8	Clostridium difficile 630	Bacteria	Firmicutes	Clostridia	Clostridiales	Peptostreptococcaceae	Clostridioides	Clostridioides difficile
272564.6	Desulfitobacterium hafniense DCB-2	Bacteria	Firmicutes	Clostridia	Clostridiales	Peptococcaceae	Desulfitobacterium	Desulfitobacterium hafniense
272620.9	Klebsiella pneumoniae subsp. pneumoniae MGH 78578	Bacteria	Proteobacteria	Gammaproteobacteria	Enterobacterales	Enterobacteriaceae	Klebsiella	Klebsiella pneumoniae
272621.13	Lactobacillus acidophilus NCFM	Bacteria	Firmicutes	Bacilli	Lactobacillales	Lactobacillaceae	Lactobacillus	Lactobacillus acidophilus
272622.8	Lactococcus lactis subsp. cremoris SK11	Bacteria	Firmicutes	Bacilli	Lactobacillales	Streptococcaceae	Lactococcus	Lactococcus lactis
272623.7	Lactococcus lactis subsp. lactis Il1403	Bacteria	Firmicutes	Bacilli	Lactobacillales	Streptococcaceae	Lactococcus	Lactococcus lactis
272626.9	Listeria innocua Clip11262	Bacteria	Firmicutes	Bacilli	Bacillales	Listeriaceae	Listeria	Listeria innocua
272634.6	Mycoplasma pneumoniae M129	Bacteria	Tenericutes	Mollicutes	Mycoplasmatales	Mycoplasmataceae	Mycoplasma	Mycoplasma pneumoniae
272994.6	Salmonella enterica subsp. enterica serovar Paratyphi B str. SPB7	Bacteria	Proteobacteria	Gammaproteobacteria	Enterobacteriales	Enterobacteriaceae	Salmonella	Salmonella enterica
273036.6	Staphylococcus aureus RF122	Bacteria	Firmicutes	Bacilli	Bacillales	Staphylococcaceae	Staphylococcus	Staphylococcus aureus
273119.6	Ureaplasma parvum serovar 3 str. ATCC 700970	Bacteria	Tenericutes	Mollicutes	Mycoplasmatales	Mycoplasmataceae	Ureaplasma	Ureaplasma parvum
273123.1	Yersinia pseudotuberculosis IP 32953	Bacteria	Proteobacteria	Gammaproteobacteria	Enterobacterales	Yersiniaceae	Yersinia	Yersinia pseudotuberculosis
278064.9	uncultured Dialister sp. strain UMGS215	Bacteria	Firmicutes	Negativicutes	Veillonellales	Veillonellaceae	Dialister	-
278197.12	Pediococcus pentosaceus ATCC 25745	Bacteria	Firmicutes	Bacilli	Lactobacillales	Lactobacillaceae	Pediococcus	Pediococcus pentosaceus
279010.13	Bacillus licheniformis ATCC 14580	Bacteria	Firmicutes	Bacilli	Bacillales	Bacillaceae	Bacillus	Bacillus licheniformis
279808.8	Staphylococcus haemolyticus JCSC1435	Bacteria	Firmicutes	Bacilli	Bacillales	Staphylococcaceae	Staphylococcus	Staphylococcus haemolyticus
281309.8	Bacillus thuringiensis serovar konkukian str. 97-27	Bacteria	Firmicutes	Bacilli	Bacillales	Bacillaceae	Bacillus	Bacillus thuringiensis
281310.6	Haemophilus influenzae 86-028NP	Bacteria	Proteobacteria	Gammaproteobacteria	Pasteurellales	Pasteurellaceae	Haemophilus	Haemophilus influenzae
282458.4	Staphylococcus aureus subsp. aureus MRSA252	Bacteria	Firmicutes	Bacilli	Bacillales	Staphylococcaceae	Staphylococcus	Staphylococcus aureus
282459.5	Staphylococcus aureus subsp. aureus MSSA476	Bacteria	Firmicutes	Bacilli	Bacillales	Staphylococcaceae	Staphylococcus	Staphylococcus aureus
286636.3	Streptococcus pyogenes MGAS10394	Bacteria	Firmicutes	Bacilli	Lactobacillales	Streptococcaceae	Streptococcus	Streptococcus pyogenes
289380.15	Clostridium perfringens SM101	Bacteria	Firmicutes	Clostridia	Clostridiales	Clostridiaceae	Clostridium	Clostridium perfringens
290054.4	Eubacterium coprostanoligenes strain ATCC 51222	Bacteria	Firmicutes	Clostridia	Clostridiales	Eubacteriaceae	Eubacterium	Eubacterium coprostanoligenes
290055.3	[Eubacterium] fissicatena strain KCTC 15010	Bacteria	Firmicutes	Clostridia	Clostridiales	Lachnospiraceae	Faecalicatena	Faecalicatena fissicatena
290336.9	Klebsiella oxytoca M5al	Bacteria	Proteobacteria	Gammaproteobacteria	Enterobacterales	Enterobacteriaceae	Klebsiella	Klebsiella michiganensis
290338.8	Citrobacter koseri ATCC BAA-895	Bacteria	Proteobacteria	Gammaproteobacteria	Enterobacterales	Enterobacteriaceae	Citrobacter	Citrobacter koseri
290339.8	Cronobacter sakazakii ATCC BAA-894	Bacteria	Proteobacteria	Gammaproteobacteria	Enterobacterales	Enterobacteriaceae	Cronobacter	Cronobacter sakazakii
290402.41	Clostridium beijerinckii NCIMB 8052	Bacteria	Firmicutes	Clostridia	Clostridiales	Clostridiaceae	Clostridium	Clostridium beijerinckii
292800.11	Flavonifractor plautii YL31	Bacteria	Firmicutes	Clostridia	Clostridiales	-	Flavonifractor	Flavonifractor plautii
292800.27	Flavonifractor plautii LFYP42	Bacteria	Firmicutes	Clostridia	Clostridiales	-	Flavonifractor	Flavonifractor plautii
295319.15	Salmonella enterica subsp. enterica serovar Paratyphi A str. ATCC 9150	Bacteria	Proteobacteria	Gammaproteobacteria	Enterobacterales	Enterobacteriaceae	Salmonella	Salmonella enterica
295405.11	Bacteroides fragilis YCH46	Bacteria	Bacteroidetes	Bacteroidia	Bacteroidales	Bacteroidaceae	Bacteroides	Bacteroides fragilis
299033.6	Lactobacillus reuteri F275	Bacteria	Firmicutes	Bacilli	Lactobacillales	Lactobacillaceae	Lactobacillus	Lactobacillus reuteri
299768.6	Streptococcus thermophilus CNRZ1066	Bacteria	Firmicutes	Bacilli	Lactobacillales	Streptococcaceae	Streptococcus	Streptococcus thermophilus
300267.13	Shigella dysenteriae Sd197	Bacteria	Proteobacteria	Gammaproteobacteria	Enterobacterales	Enterobacteriaceae	Shigella	Shigella dysenteriae
300269.12	Shigella sonnei Ss046	Bacteria	Proteobacteria	Gammaproteobacteria	Enterobacterales	Enterobacteriaceae	Shigella	Shigella sonnei
301302.3	Roseburia faecis	Bacteria	Firmicutes	Clostridia	Clostridiales	Lachnospiraceae	Roseburia	Roseburia faecis
301302.4	Roseburia faecis strain M72	Bacteria	Firmicutes	Clostridia	Clostridiales	Lachnospiraceae	Roseburia	Roseburia faecis
306254.7	Campylobacter coli RM2228	Bacteria	Proteobacteria	Epsilonproteobacteria	Campylobacterales	Campylobacteraceae	Campylobacter	Campylobacter coli
306263.5	Campylobacter lari RM2100	Bacteria	Proteobacteria	Epsilonproteobacteria	Campylobacterales	Campylobacteraceae	Campylobacter	Campylobacter lari
306264.5	Campylobacter upsaliensis RM3195	Bacteria	Proteobacteria	Epsilonproteobacteria	Campylobacterales	Campylobacteraceae	Campylobacter	Campylobacter upsaliensis
314315.12	Lactobacillus sakei subsp. sakei 23K	Bacteria	Firmicutes	Bacilli	Lactobacillales	Lactobacillaceae	Lactobacillus	Lactobacillus sakei
315405.22	Streptococcus gallolyticus strain NCTC13773	Bacteria	Firmicutes	Bacilli	Lactobacillales	Streptococcaceae	Streptococcus	Streptococcus gallolyticus
315405.34	Streptococcus gallolyticus PS_064_S07	Bacteria	Firmicutes	Bacilli	Lactobacillales	Streptococcaceae	Streptococcus	Streptococcus gallolyticus
315750.8	Bacillus pumilus SAFR-032	Bacteria	Firmicutes	Bacilli	Bacillales	Bacillaceae	Bacillus	Bacillus pumilus
316385.7	Escherichia coli str. K-12 substr. DH10B	Bacteria	Proteobacteria	Gammaproteobacteria	Enterobacterales	Enterobacteriaceae	Escherichia	Escherichia coli
316401.4	Escherichia coli ETEC H10407	Bacteria	Proteobacteria	Gammaproteobacteria	Enterobacterales	Enterobacteriaceae	Escherichia	Escherichia coli
316407.9	Escherichia coli str. K-12 substr. W3110	Bacteria	Proteobacteria	Gammaproteobacteria	Enterobacterales	Enterobacteriaceae	Escherichia	Escherichia coli
321314.9	Salmonella enterica subsp. enterica serovar Choleraesuis str.	Bacteria	Proteobacteria	Gammaproteobacteria	Enterobacterales	Enterobacteriaceae	Salmonella	Salmonella enterica
321955.4	Brevibacterium linens BL2	Bacteria	Actinobacteria	Actinobacteria	Micrococcales	Brevibacteriaceae	Brevibacterium	Brevibacterium linens
321956.7	Lactobacillus delbrueckii subsp. bulgaricus ATCC BAA-365	Bacteria	Firmicutes	Bacilli	Lactobacillales	Lactobacillaceae	Lactobacillus	Lactobacillus delbrueckii
321967.11	Lactobacillus casei ATCC 334	Bacteria	Firmicutes	Bacilli	Lactobacillales	Lactobacillaceae	Lactobacillus	Lactobacillus paracasei
322159.8	Streptococcus thermophilus LMD-9	Bacteria	Firmicutes	Bacilli	Lactobacillales	Streptococcaceae	Streptococcus	Streptococcus thermophilus
324057.4	Paenibacillus sp. JDR-2	Bacteria	Firmicutes	Bacilli	Bacillales	Paenibacillaceae	Paenibacillus	-
324831.13	Lactobacillus gasseri ATCC 33323	Bacteria	Firmicutes	Bacilli	Lactobacillales	Lactobacillaceae	Lactobacillus	Lactobacillus gasseri
326423.5	Bacillus amyloliquefaciens FZB42	Bacteria	Firmicutes	Bacilli	Bacillales	Bacillaceae	Bacillus	Bacillus velezensis
326426.4	Bifidobacterium breve UCC2003	Bacteria	Actinobacteria	Actinobacteria	Bifidobacteriales	Bifidobacteriaceae	Bifidobacterium	Bifidobacterium breve
329854.7	Bacteroides intestinalis strain KLE1704	Bacteria	Bacteroidetes	Bacteroidia	Bacteroidales	Bacteroidaceae	Bacteroides	Bacteroides intestinalis
331112.6	Escherichia coli HS	Bacteria	Proteobacteria	Gammaproteobacteria	Enterobacterales	Enterobacteriaceae	Escherichia	Escherichia coli
332977.5	Parapedobacter koreensis Jip14	Bacteria	Bacteroidetes	Sphingobacteriia	Sphingobacteriales	Sphingobacteriaceae	Parapedobacter	Parapedobacter koreensis
333849.6	Enterococcus faecium DO	Bacteria	Firmicutes	Bacilli	Lactobacillales	Enterococcaceae	Enterococcus	Enterococcus faecium
334390.3	Lactobacillus fermentum IFO 3956	Bacteria	Firmicutes	Bacilli	Lactobacillales	Lactobacillaceae	Lactobacillus	Lactobacillus fermentum
334413.6	Finegoldia magna ATCC 29328	Bacteria	Firmicutes	Tissierellia	Tissierellales	Peptoniphilaceae	Finegoldia	Finegoldia magna
334727.3	Bacillus atrophaeus C89	Bacteria	Firmicutes	Bacilli	Bacillales	Bacillaceae	Bacillus	Bacillus atrophaeus
340101.3	Victivallis vadensis ATCC BAA-548	Bacteria	Lentisphaerae	Lentisphaeria	Victivallales	Victivallaceae	Victivallis	Victivallis vadensis
342451.11	Staphylococcus saprophyticus subsp. saprophyticus ATCC 15305	Bacteria	Firmicutes	Bacilli	Bacillales	Staphylococcaceae	Staphylococcus	Staphylococcus saprophyticus
344601.5	Escherichia coli B171	Bacteria	Proteobacteria	Gammaproteobacteria	Enterobacterales	Enterobacteriaceae	Escherichia	Escherichia coli
344610.7	Escherichia coli 53638	Bacteria	Proteobacteria	Gammaproteobacteria	Enterobacterales	Enterobacteriaceae	Escherichia	Escherichia coli
347253.5	Streptococcus salivarius JIM8777	Bacteria	Firmicutes	Bacilli	Lactobacillales	Streptococcaceae	Streptococcus	Streptococcus salivarius
347256.5	Mycoplasma hominis ATCC 23114	Bacteria	Tenericutes	Mollicutes	Mycoplasmatales	Mycoplasmataceae	Mycoplasma	Mycoplasma hominis
348151.3	Lactobacillus siliginis strain DSM 22696	Bacteria	Firmicutes	Bacilli	Lactobacillales	Lactobacillaceae	Lactobacillus	Lactobacillus siliginis
349123.6	Lactobacillus reuteri 100-23	Bacteria	Firmicutes	Bacilli	Lactobacillales	Lactobacillaceae	Lactobacillus	Lactobacillus reuteri
349161.6	Desulfotomaculum reducens MI-1	Bacteria	Firmicutes	Clostridia	Clostridiales	Peptococcaceae	Desulfotomaculum	Desulfotomaculum reducens
349741.6	Akkermansia muciniphila ATCC BAA-835	Bacteria	Verrucomicrobia	Verrucomicrobiae	Verrucomicrobiales	Akkermansiaceae	Akkermansia	Akkermansia muciniphila
349747.9	Yersinia pseudotuberculosis IP 31758	Bacteria	Proteobacteria	Gammaproteobacteria	Enterobacterales	Yersiniaceae	Yersinia	Yersinia pseudotuberculosis
349966.5	Yersinia frederiksenii ATCC 33641	Bacteria	Proteobacteria	Gammaproteobacteria	Enterobacterales	Yersiniaceae	Yersinia	Yersinia frederiksenii
349966.8	Yersinia frederiksenii ATCC 33641	Bacteria	Proteobacteria	Gammaproteobacteria	Enterobacterales	Yersiniaceae	Yersinia	Yersinia frederiksenii
350703.9	Pseudomonas aeruginosa 2192	Bacteria	Proteobacteria	Gammaproteobacteria	Pseudomonadales	Pseudomonadaceae	Pseudomonas	Pseudomonas aeruginosa
351746.6	Pseudomonas putida F1	Bacteria	Proteobacteria	Gammaproteobacteria	Pseudomonadales	Pseudomonadaceae	Pseudomonas	Pseudomonas putida
352165.3	Pyramidobacter piscolens W5455	Bacteria	Synergistetes	Synergistia	Synergistales	Synergistaceae	Pyramidobacter	Pyramidobacter piscolens
353496.3	Lactobacillus delbrueckii subsp. bulgaricus 2038	Bacteria	Firmicutes	Bacilli	Lactobacillales	Lactobacillaceae	Lactobacillus	Lactobacillus delbrueckii
354242.17	Campylobacter jejuni subsp. jejuni 81-176 [WGS]	Bacteria	Proteobacteria	Epsilonproteobacteria	Campylobacterales	Campylobacteraceae	Campylobacter	Campylobacter jejuni
358681.3	Brevibacillus brevis NBRC 100599	Bacteria	Firmicutes	Bacilli	Bacillales	Paenibacillaceae	Brevibacillus	Brevibacillus brevis
359786.13	Staphylococcus aureus subsp. aureus JH9	Bacteria	Firmicutes	Bacilli	Bacillales	Staphylococcaceae	Staphylococcus	Staphylococcus aureus
359787.11	Staphylococcus aureus subsp. aureus JH1	Bacteria	Firmicutes	Bacilli	Bacillales	Staphylococcaceae	Staphylococcus	Staphylococcus aureus
360104.9	Campylobacter concisus 13826	Bacteria	Proteobacteria	Epsilonproteobacteria	Campylobacterales	Campylobacteraceae	Campylobacter	Campylobacter concisus
360105.8	Campylobacter curvus 525.92	Bacteria	Proteobacteria	Epsilonproteobacteria	Campylobacterales	Campylobacteraceae	Campylobacter	Campylobacter curvus
360106.6	Campylobacter fetus subsp. fetus 82-40	Bacteria	Proteobacteria	Epsilonproteobacteria	Campylobacterales	Campylobacteraceae	Campylobacter	Campylobacter fetus
360107.7	Campylobacter hominis ATCC BAA-381	Bacteria	Proteobacteria	Epsilonproteobacteria	Campylobacterales	Campylobacteraceae	Campylobacter	Campylobacter hominis
360109.7	Campylobacter jejuni subsp. doylei 269.97	Bacteria	Proteobacteria	Epsilonproteobacteria	Campylobacterales	Campylobacteraceae	Campylobacter	Campylobacter jejuni
361100.6	Bacillus cereus Q1	Bacteria	Firmicutes	Bacilli	Bacillales	Bacillaceae	Bacillus	Bacillus cereus
362663.9	Escherichia coli 536	Bacteria	Proteobacteria	Gammaproteobacteria	Enterobacterales	Enterobacteriaceae	Escherichia	Escherichia coli
362948.14	Lactobacillus salivarius UCC118	Bacteria	Firmicutes	Bacilli	Lactobacillales	Lactobacillaceae	Lactobacillus	Lactobacillus salivarius
363265.4	Prevotella stercorea strain UBA10787	Bacteria	Bacteroidetes	Bacteroidia	Bacteroidales	Prevotellaceae	Prevotella	Prevotella stercorea
363265.5	Prevotella stercorea strain AF42-9	Bacteria	Bacteroidetes	Bacteroidia	Bacteroidales	Prevotellaceae	Prevotella	Prevotella stercorea
364106.8	Escherichia coli UTI89	Bacteria	Proteobacteria	Gammaproteobacteria	Enterobacterales	Enterobacteriaceae	Escherichia	Escherichia coli
365659.3	Streptococcus mitis B6	Bacteria	Firmicutes	Bacilli	Lactobacillales	Streptococcaceae	Streptococcus	Streptococcus mitis
367459.5	Clostridium difficile QCD-32g58	Bacteria	Firmicutes	Clostridia	Clostridiales	Peptostreptococcaceae	Clostridioides	Clostridioides difficile
367928.6	Bifidobacterium adolescentis ATCC 15703	Bacteria	Actinobacteria	Actinobacteria	Bifidobacteriales	Bifidobacteriaceae	Bifidobacterium	Bifidobacterium adolescentis
373153.27	Streptococcus pneumoniae D39	Bacteria	Firmicutes	Bacilli	Lactobacillales	Streptococcaceae	Streptococcus	Streptococcus pneumoniae
373384.11	Shigella flexneri 5 str. 8401	Bacteria	Proteobacteria	Gammaproteobacteria	Enterobacterales	Enterobacteriaceae	Shigella	Shigella flexneri
374930.9	Haemophilus influenzae PittEE	Bacteria	Proteobacteria	Gammaproteobacteria	Pasteurellales	Pasteurellaceae	Haemophilus	Haemophilus influenzae
374931.9	Haemophilus influenzae PittGG	Bacteria	Proteobacteria	Gammaproteobacteria	Pasteurellales	Pasteurellaceae	Haemophilus	Haemophilus influenzae
375286.7	Janthinobacterium sp. Marseille	Bacteria	Proteobacteria	Betaproteobacteria	Burkholderiales	Oxalobacteraceae	Janthinobacterium	-
378753.5	Kocuria rhizophila DC2201	Bacteria	Actinobacteria	Actinobacteria	Micrococcales	Micrococcaceae	Kocuria	Kocuria rhizophila
379731.5	Pseudomonas stutzeri A1501	Bacteria	Proteobacteria	Gammaproteobacteria	Pseudomonadales	Pseudomonadaceae	Pseudomonas	Pseudomonas stutzeri
380703.7	Aeromonas hydrophila subsp. hydrophila ATCC 7966	Bacteria	Proteobacteria	Gammaproteobacteria	Aeromonadales	Aeromonadaceae	Aeromonas	Aeromonas hydrophila
381754.6	Pseudomonas aeruginosa PA7	Bacteria	Proteobacteria	Gammaproteobacteria	Pseudomonadales	Pseudomonadaceae	Pseudomonas	Pseudomonas aeruginosa
384636.4	Bacteroides xylanolyticus strain DSM 3808	Bacteria	Bacteroidetes	Bacteroidia	Bacteroidales	Bacteroidaceae	Bacteroides	Bacteroides xylanolyticus
384639.4	Bacteroides galacturonicus strain DSM 3978	Bacteria	Bacteroidetes	Bacteroidia	Bacteroidales	Bacteroidaceae	Bacteroides	Bacteroides galacturonicus
386414.4	Prevotella timonensis strain UMB0818	Bacteria	Bacteroidetes	Bacteroidia	Bacteroidales	Prevotellaceae	Prevotella	Prevotella timonensis
386414.5	Prevotella timonensis strain DNF00076	Bacteria	Bacteroidetes	Bacteroidia	Bacteroidales	Prevotellaceae	Prevotella	Prevotella timonensis
386585.9	Escherichia coli O157:H7 str. Sakai	Bacteria	Proteobacteria	Gammaproteobacteria	Enterobacterales	Enterobacteriaceae	Escherichia	Escherichia coli
387344.15	Lactobacillus brevis ATCC 367	Bacteria	Firmicutes	Bacilli	Lactobacillales	Lactobacillaceae	Lactobacillus	Lactobacillus brevis
388919.9	Streptococcus sanguinis SK36	Bacteria	Firmicutes	Bacilli	Lactobacillales	Streptococcaceae	Streptococcus	Streptococcus sanguinis
390235.5	Pseudomonas putida W619	Bacteria	Proteobacteria	Gammaproteobacteria	Pseudomonadales	Pseudomonadaceae	Pseudomonas	Pseudomonas putida
390333.7	Lactobacillus delbrueckii subsp. bulgaricus ATCC 11842	Bacteria	Firmicutes	Bacilli	Lactobacillales	Lactobacillaceae	Lactobacillus	Lactobacillus delbrueckii
391008.4	Stenotrophomonas maltophilia R551-3	Bacteria	Proteobacteria	Gammaproteobacteria	Xanthomonadales	Xanthomonadaceae	Stenotrophomonas	Stenotrophomonas maltophilia
391904.8	Bifidobacterium longum subsp. infantis ATCC 15697 = JCM 1222	Bacteria	Actinobacteria	Actinobacteria	Bifidobacteriales	Bifidobacteriaceae	Bifidobacterium	Bifidobacterium longum
393305.7	Yersinia enterocolitica subsp. enterocolitica 8081	Bacteria	Proteobacteria	Gammaproteobacteria	Enterobacterales	Yersiniaceae	Yersinia	Yersinia enterocolitica
393480.8	Fusobacterium nucleatum subsp. polymorphum ATCC 10953	Bacteria	Fusobacteria	Fusobacteriia	Fusobacteriales	Fusobacteriaceae	Fusobacterium	Fusobacterium nucleatum
398511.4	Bacillus pseudofirmus OF4	Bacteria	Firmicutes	Bacilli	Bacillales	Bacillaceae	Bacillus	Bacillus pseudofirmus
398513.5	Bifidobacterium bifidum NCIMB 41171	Bacteria	Actinobacteria	Actinobacteria	Bifidobacteriales	Bifidobacteriaceae	Bifidobacterium	Bifidobacterium bifidum
398525.3	Bradyrhizobium elkanii USDA 76	Bacteria	Proteobacteria	Alphaproteobacteria	Rhizobiales	Bradyrhizobiaceae	Bradyrhizobium	Bradyrhizobium elkanii
398578.5	Delftia acidovorans SPH-1	Bacteria	Proteobacteria	Betaproteobacteria	Burkholderiales	Comamonadaceae	Delftia	Delftia acidovorans
399795.3	Comamonas testosteroni KF-1	Bacteria	Proteobacteria	Betaproteobacteria	Burkholderiales	Comamonadaceae	Comamonas	Comamonas testosteroni
400667.7	Acinetobacter baumannii ATCC 17978	Bacteria	Proteobacteria	Gammaproteobacteria	Pseudomonadales	Moraxellaceae	Acinetobacter	Acinetobacter baumannii
401473.3	Bifidobacterium dentium Bd1	Bacteria	Actinobacteria	Actinobacteria	Bifidobacteriales	Bifidobacteriaceae	Bifidobacterium	Bifidobacterium dentium
405416.6	Acinetobacter baumannii ACICU	Bacteria	Proteobacteria	Gammaproteobacteria	Pseudomonadales	Moraxellaceae	Acinetobacter	Acinetobacter baumannii
405531.7	Bacillus cereus G9842	Bacteria	Firmicutes	Bacilli	Bacillales	Bacillaceae	Bacillus	Bacillus cereus
405532.5	Bacillus cereus B4264	Bacteria	Firmicutes	Bacilli	Bacillales	Bacillaceae	Bacillus	Bacillus cereus
405534.9	Bacillus cereus AH187	Bacteria	Firmicutes	Bacilli	Bacillales	Bacillaceae	Bacillus	Bacillus cereus
405535.8	Bacillus cereus AH820	Bacteria	Firmicutes	Bacilli	Bacillales	Bacillaceae	Bacillus	Bacillus cereus
405566.6	Lactobacillus helveticus DPC 4571	Bacteria	Firmicutes	Bacilli	Lactobacillales	Lactobacillaceae	Lactobacillus	Lactobacillus helveticus
405955.13	Escherichia coli APEC O1	Bacteria	Proteobacteria	Gammaproteobacteria	Enterobacterales	Enterobacteriaceae	Escherichia	Escherichia coli
407148.6	Campylobacter jejuni subsp. jejuni 81116	Bacteria	Proteobacteria	Epsilonproteobacteria	Campylobacterales	Campylobacteraceae	Campylobacter	Campylobacter jejuni
409438.11	Escherichia coli SE11	Bacteria	Proteobacteria	Gammaproteobacteria	Enterobacterales	Enterobacteriaceae	Escherichia	Escherichia coli
411459.7	Ruminococcus obeum ATCC 29174	Bacteria	Firmicutes	Clostridia	Clostridiales	Lachnospiraceae	Blautia	Blautia obeum
411460.6	Ruminococcus torques ATCC 27756	Bacteria	Firmicutes	Clostridia	Clostridiales	Lachnospiraceae	Blautia	[Ruminococcus] torques
411461.4	Dorea formicigenerans ATCC 27755	Bacteria	Firmicutes	Clostridia	Clostridiales	Lachnospiraceae	Dorea	Dorea formicigenerans
411462.6	Dorea longicatena DSM 13814	Bacteria	Firmicutes	Clostridia	Clostridiales	Lachnospiraceae	Dorea	Dorea longicatena
411463.4	Eubacterium ventriosum ATCC 27560	Bacteria	Firmicutes	Clostridia	Clostridiales	Eubacteriaceae	Eubacterium	Eubacterium ventriosum
411464.8	Desulfovibrio piger ATCC 29098	Bacteria	Proteobacteria	Deltaproteobacteria	Desulfovibrionales	Desulfovibrionaceae	Desulfovibrio	Desulfovibrio piger
411465.10	Parvimonas micra ATCC 33270	Bacteria	Firmicutes	Tissierellia	Tissierellales	Peptoniphilaceae	Parvimonas	Parvimonas micra
411466.7	Actinomyces odontolyticus ATCC 17982	Bacteria	Actinobacteria	Actinobacteria	Actinomycetales	Actinomycetaceae	Actinomyces	Actinomyces odontolyticus
411467.6	Bacteroides capillosus ATCC 29799	Bacteria	Firmicutes	Clostridia	Clostridiales	-	Pseudoflavonifractor	Pseudoflavonifractor capillosus
411467.62	Pseudoflavonifractor capillosus ATCC 29799	Bacteria	Firmicutes	Clostridia	Clostridiales	Ruminococcaceae	Pseudoflavonifractor	Pseudoflavonifractor capillosus
411468.9	Clostridium scindens ATCC 35704	Bacteria	Firmicutes	Clostridia	Clostridiales	Lachnospiraceae	Lachnoclostridium	[Clostridium] scindens
411469.3	Eubacterium hallii DSM 3353	Bacteria	Firmicutes	Clostridia	Clostridiales	Eubacteriaceae	Eubacterium	[Eubacterium] hallii
411470.6	Ruminococcus gnavus ATCC 29149	Bacteria	Firmicutes	Clostridia	Clostridiales	Lachnospiraceae	Blautia	[Ruminococcus] gnavus
411471.5	Subdoligranulum variabile DSM 15176	Bacteria	Firmicutes	Clostridia	Clostridiales	Ruminococcaceae	Subdoligranulum	Subdoligranulum variabile
411472.5	Clostridium symbiosum ATCC 14940	Bacteria	Firmicutes	Clostridia	Clostridiales	Lachnospiraceae	Lachnoclostridium	[Clostridium] symbiosum
411473.3	Ruminococcus callidus ATCC 27760	Bacteria	Firmicutes	Clostridia	Clostridiales	Ruminococcaceae	Ruminococcus	Ruminococcus callidus
411474.6	Coprococcus eutactus ATCC 27759	Bacteria	Firmicutes	Clostridia	Clostridiales	Lachnospiraceae	Coprococcus	Coprococcus eutactus
411475.3	Flavonifractor plautii ATCC 29863	Bacteria	Firmicutes	Clostridia	Clostridiales	-	Flavonifractor	Flavonifractor plautii
411476.11	Bacteroides ovatus ATCC 8483	Bacteria	Bacteroidetes	Bacteroidia	Bacteroidales	Bacteroidaceae	Bacteroides	Bacteroides ovatus
411477.4	Parabacteroides merdae ATCC 43184	Bacteria	Bacteroidetes	Bacteroidia	Bacteroidales	Tannerellaceae	Parabacteroides	Parabacteroides merdae
411479.10	Bacteroides uniformis ATCC 8492	Bacteria	Bacteroidetes	Bacteroidia	Bacteroidales	Bacteroidaceae	Bacteroides	Bacteroides uniformis
411481.5	Bifidobacterium adolescentis L2-32	Bacteria	Actinobacteria	Actinobacteria	Bifidobacteriales	Bifidobacteriaceae	Bifidobacterium	Bifidobacterium adolescentis
411483.3	Faecalibacterium prausnitzii A2-165	Bacteria	Firmicutes	Clostridia	Clostridiales	Ruminococcaceae	Faecalibacterium	Faecalibacterium prausnitzii
411484.7	Clostridium sp. SS2/1	Bacteria	Firmicutes	Clostridia	Clostridiales	Clostridiaceae	Clostridium	-
411485.10	Faecalibacterium prausnitzii M21/2	Bacteria	Firmicutes	Clostridia	Clostridiales	Ruminococcaceae	Faecalibacterium	Faecalibacterium prausnitzii
411486.3	Clostridium sp. M62/1	Bacteria	Firmicutes	Clostridia	Clostridiales	Clostridiaceae	Clostridium	-
411489.7	Clostridium sp. L2-50	Bacteria	Firmicutes	Clostridia	Clostridiales	Clostridiaceae	Clostridium	-
411490.6	Anaerostipes caccae DSM 14662	Bacteria	Firmicutes	Clostridia	Clostridiales	Lachnospiraceae	Anaerostipes	Anaerostipes caccae
411567.3	Peptoniphilus gorbachii LFYP46	Bacteria	Firmicutes	Tissierellia	Tissierellales	Peptoniphilaceae	Peptoniphilus	Peptoniphilus gorbachii
411901.7	Bacteroides caccae ATCC 43185	Bacteria	Bacteroidetes	Bacteroidia	Bacteroidales	Bacteroidaceae	Bacteroides	Bacteroides caccae
411902.9	Clostridium bolteae ATCC BAA-613	Bacteria	Firmicutes	Clostridia	Clostridiales	Lachnospiraceae	Lachnoclostridium	[Clostridium] bolteae
411903.6	Collinsella aerofaciens ATCC 25986	Bacteria	Actinobacteria	Coriobacteriia	Coriobacteriales	Coriobacteriaceae	Collinsella	Collinsella aerofaciens
412694.7	Bacillus thuringiensis str. Al Hakam	Bacteria	Firmicutes	Bacilli	Bacillales	Bacillaceae	Bacillus	Bacillus thuringiensis
413997.3	Escherichia coli B str. REL606	Bacteria	Proteobacteria	Gammaproteobacteria	Enterobacterales	Enterobacteriaceae	Escherichia	Escherichia coli
413999.7	Clostridium botulinum A str. ATCC 3502	Bacteria	Firmicutes	Clostridia	Clostridiales	Clostridiaceae	Clostridium	Clostridium botulinum
416269.6	Actinobacillus pleuropneumoniae L20	Bacteria	Proteobacteria	Gammaproteobacteria	Pasteurellales	Pasteurellaceae	Actinobacillus	Actinobacillus pleuropneumoniae
416870.9	Lactococcus lactis subsp. cremoris MG1363	Bacteria	Firmicutes	Bacilli	Lactobacillales	Streptococcaceae	Lactococcus	Lactococcus lactis
416916.59	Aggregatibacter sp. BEED05	Bacteria	Proteobacteria	Gammaproteobacteria	Pasteurellales	Pasteurellaceae	Aggregatibacter	-
418127.6	Staphylococcus aureus subsp. aureus Mu3	Bacteria	Firmicutes	Bacilli	Bacillales	Staphylococcaceae	Staphylococcus	Staphylococcus aureus
420889.6	Lactococcus garvieae ATCC 49156	Bacteria	Firmicutes	Bacilli	Lactobacillales	Streptococcaceae	Lactococcus	Lactococcus garvieae
420890.5	Lactococcus garvieae Lg2	Bacteria	Firmicutes	Bacilli	Lactobacillales	Streptococcaceae	Lactococcus	Lactococcus garvieae
426355.14	Methylobacterium radiotolerans JCM 2831	Bacteria	Proteobacteria	Alphaproteobacteria	Rhizobiales	Methylobacteriaceae	Methylobacterium	Methylobacterium radiotolerans
426430.8	Staphylococcus aureus subsp. aureus str. Newman	Bacteria	Firmicutes	Bacilli	Bacillales	Staphylococcaceae	Staphylococcus	Staphylococcus aureus
428125.8	Clostridium leptum DSM 753	Bacteria	Firmicutes	Clostridia	Clostridiales	Ruminococcaceae	Ruminiclostridium	[Clostridium] leptum
428126.7	Clostridium spiroforme DSM 1552	Bacteria	Firmicutes	Erysipelotrichia	Erysipelotrichales	Erysipelotrichaceae	Erysipelatoclostridium	[Clostridium] spiroforme
428127.7	Eubacterium dolichum DSM 3991	Bacteria	Firmicutes	Erysipelotrichia	Erysipelotrichales	Erysipelotrichaceae	Absiella	Absiella dolichum
428128.7	Eubacterium siraeum DSM 15702	Bacteria	Firmicutes	Clostridia	Clostridiales	Ruminococcaceae	Ruminiclostridium	[Eubacterium] siraeum
431946.3	Escherichia coli SE15	Bacteria	Proteobacteria	Gammaproteobacteria	Enterobacterales	Enterobacteriaceae	Escherichia	Escherichia coli
431947.6	Porphyromonas gingivalis ATCC 33277	Bacteria	Bacteroidetes	Bacteroidia	Bacteroidales	Porphyromonadaceae	Porphyromonas	Porphyromonas gingivalis
434271.4	Actinobacillus pleuropneumoniae serovar 3 str. JL03	Bacteria	Proteobacteria	Gammaproteobacteria	Pasteurellales	Pasteurellaceae	Actinobacillus	Actinobacillus pleuropneumoniae
435590.9	Bacteroides vulgatus ATCC 8482	Bacteria	Bacteroidetes	Bacteroidia	Bacteroidales	Bacteroidaceae	Bacteroides	Bacteroides vulgatus
435591.13	Parabacteroides distasonis ATCC 8503	Bacteria	Bacteroidetes	Bacteroidia	Bacteroidales	Tannerellaceae	Parabacteroides	Parabacteroides distasonis
435830.3	Actinomyces graevenitzii C83	Bacteria	Actinobacteria	Actinobacteria	Actinomycetales	Actinomycetaceae	Actinomyces	Actinomyces graevenitzii
435832.3	Neisseria mucosa C102	Bacteria	Proteobacteria	Betaproteobacteria	Neisseriales	Neisseriaceae	Neisseria	Neisseria mucosa
435837.3	Staphylococcus hominis subsp. hominis C80	Bacteria	Firmicutes	Bacilli	Bacillales	Staphylococcaceae	Staphylococcus	Staphylococcus hominis
435838.3	Staphylococcus caprae C87	Bacteria	Firmicutes	Bacilli	Bacillales	Staphylococcaceae	Staphylococcus	Staphylococcus capitis
435998.3	Serratia marcescens WW4	Bacteria	Proteobacteria	Gammaproteobacteria	Enterobacterales	Yersiniaceae	Serratia	Serratia marcescens
439375.7	Ochrobactrum anthropi ATCC 49188	Bacteria	Proteobacteria	Alphaproteobacteria	Rhizobiales	Brucellaceae	Ochrobactrum	Ochrobactrum anthropi
439851.8	Salmonella enterica subsp. enterica serovar Dublin str. CT_02021853	Bacteria	Proteobacteria	Gammaproteobacteria	Enterobacterales	Enterobacteriaceae	Salmonella	Salmonella enterica
440496.3	Lactobacillus crispatus CTV-05	Bacteria	Firmicutes	Bacilli	Lactobacillales	Lactobacillaceae	Lactobacillus	Lactobacillus crispatus
440497.10	Lactobacillus jensenii 1153	Bacteria	Firmicutes	Bacilli	Lactobacillales	Lactobacillaceae	Lactobacillus	Lactobacillus jensenii
441620.7	Methylobacterium populi BJ001	Bacteria	Proteobacteria	Alphaproteobacteria	Rhizobiales	Methylobacteriaceae	Methylobacterium	Methylobacterium populi
441770.6	Clostridium botulinum A str. ATCC 19397	Bacteria	Firmicutes	Clostridia	Clostridiales	Clostridiaceae	Clostridium	Clostridium botulinum
441771.6	Clostridium botulinum A str. Hall	Bacteria	Firmicutes	Clostridia	Clostridiales	Clostridiaceae	Clostridium	Clostridium botulinum
442563.4	Bifidobacterium animalis subsp. lactis AD011	Bacteria	Actinobacteria	Actinobacteria	Bifidobacteriales	Bifidobacteriaceae	Bifidobacterium	Bifidobacterium animalis
444177.5	Lysinibacillus sphaericus C3-41	Bacteria	Firmicutes	Bacilli	Bacillales	Bacillaceae	Lysinibacillus	Lysinibacillus sphaericus
444449.5	Escherichia coli O157:H7 str. EC4042	Bacteria	Proteobacteria	Gammaproteobacteria	Enterobacterales	Enterobacteriaceae	Escherichia	Escherichia coli
444450.8	Escherichia coli O157:H7 str. EC4115	Bacteria	Proteobacteria	Gammaproteobacteria	Enterobacterales	Enterobacteriaceae	Escherichia	Escherichia coli
444454.5	Escherichia coli O157:H7 str. EC4024	Bacteria	Proteobacteria	Gammaproteobacteria	Enterobacterales	Enterobacteriaceae	Escherichia	Escherichia coli
445970.5	Alistipes putredinis DSM 17216	Bacteria	Bacteroidetes	Bacteroidia	Bacteroidales	Rikenellaceae	Alistipes	Alistipes putredinis
445971.6	Anaerofustis stercorihominis DSM 17244	Bacteria	Firmicutes	Clostridia	Clostridiales	Eubacteriaceae	Anaerofustis	Anaerofustis stercorihominis
445972.6	Anaerotruncus colihominis DSM 17241	Bacteria	Firmicutes	Clostridia	Clostridiales	Ruminococcaceae	Anaerotruncus	Anaerotruncus colihominis
445973.7	Clostridium bartlettii DSM 16795	Bacteria	Firmicutes	Clostridia	Clostridiales	Peptostreptococcaceae	Intestinibacter	Intestinibacter bartlettii
445974.6	Clostridium ramosum DSM 1402	Bacteria	Firmicutes	Erysipelotrichia	Erysipelotrichales	Erysipelotrichaceae	Erysipelatoclostridium	Erysipelatoclostridium ramosum
445975.6	Collinsella stercoris DSM 13279	Bacteria	Actinobacteria	Coriobacteriia	Coriobacteriales	Coriobacteriaceae	Collinsella	Collinsella stercoris
447214.4	Clostridium butyricum 5521	Bacteria	Firmicutes	Clostridia	Clostridiales	Clostridiaceae	Clostridium	Clostridium butyricum
449673.7	Bacteroides stercoris ATCC 43183	Bacteria	Bacteroidetes	Bacteroidia	Bacteroidales	Bacteroidaceae	Bacteroides	Bacteroides stercoris
450394.6	Staphylococcus aureus subsp. aureus USA300_TCH959	Bacteria	Firmicutes	Bacilli	Bacillales	Staphylococcaceae	Staphylococcus	Staphylococcus aureus
450748.3	Propionibacterium sp. 5_U_42AFAA	Bacteria	Actinobacteria	Actinobacteria	Propionibacteriales	Propionibacteriaceae	Propionibacterium	-
450749.3	Veillonella sp. 6_1_27	Bacteria	Firmicutes	Negativicutes	Veillonellales	Veillonellaceae	Veillonella	-
451640.5	Catenibacterium mitsuokai DSM 15897	Bacteria	Firmicutes	Erysipelotrichia	Erysipelotrichales	Erysipelotrichaceae	Catenibacterium	Catenibacterium mitsuokai
454154.3	Paraprevotella clara LFYP37	Bacteria	Bacteroidetes	Bacteroidia	Bacteroidales	Prevotellaceae	Paraprevotella	Paraprevotella clara
454166.8	Salmonella enterica subsp. enterica serovar Agona str. SL483	Bacteria	Proteobacteria	Gammaproteobacteria	Enterobacterales	Enterobacteriaceae	Salmonella	Salmonella enterica
455631.3	Clostridium difficile QCD-66c26	Bacteria	Firmicutes	Clostridia	Clostridiales	Peptostreptococcaceae	Clostridioides	Clostridioides difficile
457387.3	Bacteroides sp. 1_1_30	Bacteria	Bacteroidetes	Bacteroidia	Bacteroidales	Bacteroidaceae	Bacteroides	-
457388.5	Bacteroides sp. 2_1_7	Bacteria	Bacteroidetes	Bacteroidia	Bacteroidales	Tannerellaceae	Parabacteroides	-
457390.3	Bacteroides sp. 3_1_23	Bacteria	Bacteroidetes	Bacteroidia	Bacteroidales	Bacteroidaceae	Bacteroides	-
457391.3	Bacteroides sp. 3_1_33FAA	Bacteria	Bacteroidetes	Bacteroidia	Bacteroidales	Bacteroidaceae	Bacteroides	-
457392.3	Bacteroides sp. 3_2_5	Bacteria	Bacteroidetes	Bacteroidia	Bacteroidales	Bacteroidaceae	Bacteroides	-
457393.3	Bacteroides sp. 4_1_36	Bacteria	Bacteroidetes	Bacteroidia	Bacteroidales	Bacteroidaceae	Bacteroides	-
457394.3	Bacteroides sp. 4_3_47FAA	Bacteria	Bacteroidetes	Bacteroidia	Bacteroidales	Bacteroidaceae	Bacteroides	-
457395.6	Bacteroides sp. 9_1_42FAA	Bacteria	Bacteroidetes	Bacteroidia	Bacteroidales	Bacteroidaceae	Bacteroides	-
457396.3	Clostridium sp. 7_2_43FAA	Bacteria	Firmicutes	Clostridia	Clostridiales	Clostridiaceae	Clostridium	-
457398.5	Desulfovibrio sp. 3_1_syn3	Bacteria	Proteobacteria	Deltaproteobacteria	Desulfovibrionales	Desulfovibrionaceae	Desulfovibrio	-
457401.3	Escherichia sp. 4_1_40B	Bacteria	Proteobacteria	Gammaproteobacteria	Enterobacterales	Enterobacteriaceae	Escherichia	-
457402.3	Eubacterium sp. 3_1_31	Bacteria	Firmicutes	Clostridia	Clostridiales	Eubacteriaceae	Eubacterium	-
457403.3	Fusobacterium sp. 11_3_2	Bacteria	Fusobacteria	Fusobacteriia	Fusobacteriales	Fusobacteriaceae	Fusobacterium	Fusobacterium nucleatum
457403.8	Fusobacterium nucleatum subsp. animalis 11_3_2	Bacteria	Fusobacteria	Fusobacteriia	Fusobacteriales	Fusobacteriaceae	Fusobacterium	Fusobacterium nucleatum
457404.3	Fusobacterium sp. 12_1B	Bacteria	Fusobacteria	Fusobacteriia	Fusobacteriales	Fusobacteriaceae	Fusobacterium	Fusobacterium ulcerans
457404.5	Fusobacterium ulcerans 12-1B	Bacteria	Fusobacteria	Fusobacteriia	Fusobacteriales	Fusobacteriaceae	Fusobacterium	Fusobacterium ulcerans
457405.3	Fusobacterium sp. 7_1	Bacteria	Fusobacteria	Fusobacteriia	Fusobacteriales	Fusobacteriaceae	Fusobacterium	Fusobacterium nucleatum
457405.9	Fusobacterium nucleatum subsp. animalis 7_1	Bacteria	Fusobacteria	Fusobacteriia	Fusobacteriales	Fusobacteriaceae	Fusobacterium	Fusobacterium nucleatum
457412.4	Ruminococcus sp. 5_1_39BFAA	Bacteria	Firmicutes	Clostridia	Clostridiales	Ruminococcaceae	Ruminococcus	-
457415.3	Synergistes sp. 3_1_syn1	Bacteria	Synergistetes	Synergistia	Synergistales	Synergistaceae	Synergistes	-
457416.3	Veillonella sp. 3_1_44	Bacteria	Firmicutes	Negativicutes	Veillonellales	Veillonellaceae	Veillonella	-
457421.5	Clostridiales bacterium 1_7_47FAA	Bacteria	Firmicutes	Clostridia	Clostridiales	-	-	-
457422.3	Erysipelotrichaceae bacterium 2_2_44A	Bacteria	Firmicutes	Erysipelotrichia	Erysipelotrichales	Erysipelotrichaceae	-	-
460384.4	[Clostridium] lavalense strain NLAE-zl-G277	Bacteria	Firmicutes	Clostridia	Clostridiales	Lachnospiraceae	Lachnoclostridium	[Clostridium] lavalense
465515.4	Micrococcus luteus NCTC 2665	Bacteria	Actinobacteria	Actinobacteria	Micrococcales	Micrococcaceae	Micrococcus	Micrococcus luteus
467210.3	Lachnoanaerobaculum saburreum strain DNF00896	Bacteria	Firmicutes	Clostridia	Clostridiales	Lachnospiraceae	Lachnoanaerobaculum	Lachnoanaerobaculum saburreum
467705.9	Streptococcus gordonii str. Challis substr. CH1	Bacteria	Firmicutes	Bacilli	Lactobacillales	Streptococcaceae	Streptococcus	Streptococcus gordonii
469008.4	Escherichia coli BL21(DE3)	Bacteria	Proteobacteria	Gammaproteobacteria	Enterobacterales	Enterobacteriaceae	Escherichia	Escherichia coli
469378.5	Cryptobacterium curtum DSM 15641	Bacteria	Actinobacteria	Coriobacteriia	Eggerthellales	Eggerthellaceae	Cryptobacterium	Cryptobacterium curtum
469585.3	Bacteroides sp. 1_1_14	Bacteria	Bacteroidetes	Bacteroidia	Bacteroidales	Bacteroidaceae	Bacteroides	-
469586.3	Bacteroides sp. 1_1_6	Bacteria	Bacteroidetes	Bacteroidia	Bacteroidales	Bacteroidaceae	Bacteroides	-
469587.3	Bacteroides sp. 2_1_16	Bacteria	Bacteroidetes	Bacteroidia	Bacteroidales	Bacteroidaceae	Bacteroides	-
469588.3	Bacteroides sp. 2_1_22	Bacteria	Bacteroidetes	Bacteroidia	Bacteroidales	Bacteroidaceae	Bacteroides	-
469589.3	Bacteroides sp. 2_1_33B	Bacteria	Bacteroidetes	Bacteroidia	Bacteroidales	Bacteroidaceae	Bacteroides	-
469590.5	Bacteroides sp. 2_2_4	Bacteria	Bacteroidetes	Bacteroidia	Bacteroidales	Bacteroidaceae	Bacteroides	-
469592.4	Bacteroides sp. 3_1_19	Bacteria	Bacteroidetes	Bacteroidia	Bacteroidales	Bacteroidaceae	Bacteroides	-
469593.3	Bacteroides sp. 3_1_40A	Bacteria	Bacteroidetes	Bacteroidia	Bacteroidales	Bacteroidaceae	Bacteroides	-
469594.3	Bifidobacterium longum subsp. longum 12_1_47BFAA	Bacteria	Actinobacteria	Actinobacteria	Bifidobacteriales	Bifidobacteriaceae	Bifidobacterium	Bifidobacterium longum
469595.3	Citrobacter sp. 30_2	Bacteria	Proteobacteria	Gammaproteobacteria	Enterobacterales	Enterobacteriaceae	Citrobacter	-
469596.3	Coprobacillus sp. 29_1	Bacteria	Firmicutes	Erysipelotrichia	Erysipelotrichales	Erysipelotrichaceae	Coprobacillus	-
469597.4	Coprobacillus sp. 8_2_54BFAA	Bacteria	Firmicutes	Erysipelotrichia	Erysipelotrichales	Erysipelotrichaceae	Coprobacillus	-
469598.5	Escherichia sp. 3_2_53FAA	Bacteria	Proteobacteria	Gammaproteobacteria	Enterobacterales	Enterobacteriaceae	Escherichia	-
469599.3	Fusobacterium sp. 2_1_31	Bacteria	Fusobacteria	Fusobacteriia	Fusobacteriales	Fusobacteriaceae	Fusobacterium	Fusobacterium periodonticum
469599.8	Fusobacterium periodonticum 2_1_31	Bacteria	Fusobacteria	Fusobacteriia	Fusobacteriales	Fusobacteriaceae	Fusobacterium	Fusobacterium periodonticum
469601.3	Fusobacterium sp. 21_1A	Bacteria	Fusobacteria	Fusobacteriia	Fusobacteriales	Fusobacteriaceae	Fusobacterium	Fusobacterium nucleatum
469601.8	Fusobacterium nucleatum subsp. animalis 21_1A	Bacteria	Fusobacteria	Fusobacteriia	Fusobacteriales	Fusobacteriaceae	Fusobacterium	Fusobacterium nucleatum
469602.3	Fusobacterium sp. 3_1_27	Bacteria	Fusobacteria	Fusobacteriia	Fusobacteriales	Fusobacteriaceae	Fusobacterium	Fusobacterium nucleatum
469602.7	Fusobacterium nucleatum subsp. vincentii 3_1_27	Bacteria	Fusobacteria	Fusobacteriia	Fusobacteriales	Fusobacteriaceae	Fusobacterium	Fusobacterium nucleatum
469603.3	Fusobacterium sp. 3_1_33	Bacteria	Fusobacteria	Fusobacteriia	Fusobacteriales	Fusobacteriaceae	Fusobacterium	Fusobacterium nucleatum
469604.3	Fusobacterium sp. 3_1_36A2	Bacteria	Fusobacteria	Fusobacteriia	Fusobacteriales	Fusobacteriaceae	Fusobacterium	Fusobacterium nucleatum
469604.7	Fusobacterium nucleatum subsp. vincentii 3_1_36A2	Bacteria	Fusobacteria	Fusobacteriia	Fusobacteriales	Fusobacteriaceae	Fusobacterium	Fusobacterium nucleatum
469605.3	Fusobacterium sp. 3_1_5R	Bacteria	Fusobacteria	Fusobacteriia	Fusobacteriales	Fusobacteriaceae	Fusobacterium	Fusobacterium gonidiaformans
469605.7	Fusobacterium gonidiaformans 3-1-5R	Bacteria	Fusobacteria	Fusobacteriia	Fusobacteriales	Fusobacteriaceae	Fusobacterium	Fusobacterium gonidiaformans
469606.3	Fusobacterium sp. 4_1_13	Bacteria	Fusobacteria	Fusobacteriia	Fusobacteriales	Fusobacteriaceae	Fusobacterium	Fusobacterium nucleatum
469606.8	Fusobacterium nucleatum subsp. vincentii 4_1_13	Bacteria	Fusobacteria	Fusobacteriia	Fusobacteriales	Fusobacteriaceae	Fusobacterium	Fusobacterium nucleatum
469607.3	Fusobacterium nucleatum subsp. animalis 4_8	Bacteria	Fusobacteria	Fusobacteriia	Fusobacteriales	Fusobacteriaceae	Fusobacterium	Fusobacterium nucleatum
469608.3	Klebsiella sp. 1_1_55	Bacteria	Proteobacteria	Gammaproteobacteria	Enterobacterales	Enterobacteriaceae	Klebsiella	-
469609.3	Streptococcus sp. 2_1_36FAA	Bacteria	Firmicutes	Bacilli	Lactobacillales	Streptococcaceae	Streptococcus	-
469610.4	Burkholderiales bacterium 1_1_47	Bacteria	Proteobacteria	Betaproteobacteria	Burkholderiales	-	-	-
469613.3	Enterobacteriaceae bacterium 9_2_54FAA	Bacteria	Proteobacteria	Gammaproteobacteria	Enterobacterales	Enterobacteriaceae	-	-
469614.3	Erysipelotrichaceae bacterium 6_1_45	Bacteria	Firmicutes	Erysipelotrichia	Erysipelotrichales	Erysipelotrichaceae	-	-
469615.3	Fusobacterium gonidiaformans ATCC 25563	Bacteria	Fusobacteria	Fusobacteriia	Fusobacteriales	Fusobacteriaceae	Fusobacterium	Fusobacterium gonidiaformans
469616.3	Fusobacterium mortiferum ATCC 9817	Bacteria	Fusobacteria	Fusobacteriia	Fusobacteriales	Fusobacteriaceae	Fusobacterium	Fusobacterium mortiferum
469617.3	Fusobacterium ulcerans ATCC 49185	Bacteria	Fusobacteria	Fusobacteriia	Fusobacteriales	Fusobacteriaceae	Fusobacterium	Fusobacterium ulcerans
469618.3	Fusobacterium varium ATCC 27725	Bacteria	Fusobacteria	Fusobacteriia	Fusobacteriales	Fusobacteriaceae	Fusobacterium	Fusobacterium varium
469621.3	Fusobacterium sp. 1_1_41FAA	Bacteria	Fusobacteria	Fusobacteriia	Fusobacteriales	Fusobacteriaceae	Fusobacterium	Fusobacterium periodonticum
469621.8	Fusobacterium periodonticum 1_1_41FAA	Bacteria	Fusobacteria	Fusobacteriia	Fusobacteriales	Fusobacteriaceae	Fusobacterium	Fusobacterium periodonticum
470145.6	Bacteroides coprocola DSM 17136	Bacteria	Bacteroidetes	Bacteroidia	Bacteroidales	Bacteroidaceae	Bacteroides	Bacteroides coprocola
470146.3	Coprococcus comes ATCC 27758	Bacteria	Firmicutes	Clostridia	Clostridiales	Lachnospiraceae	Coprococcus	Coprococcus comes
471854.5	Dyadobacter fermentans DSM 18053	Bacteria	Bacteroidetes	Cytophagia	Cytophagales	Cytophagaceae	Dyadobacter	Dyadobacter fermentans
471870.8	Bacteroides intestinalis DSM 17393	Bacteria	Bacteroidetes	Bacteroidia	Bacteroidales	Bacteroidaceae	Bacteroides	Bacteroides intestinalis
471871.7	Clostridium sporogenes ATCC 15579	Bacteria	Firmicutes	Clostridia	Clostridiales	Clostridiaceae	Clostridium	Clostridium sporogenes
471872.6	Streptococcus infantarius subsp. infantarius ATCC BAA-102	Bacteria	Firmicutes	Bacilli	Lactobacillales	Streptococcaceae	Streptococcus	Streptococcus infantarius
471874.6	Providencia stuartii ATCC 25827	Bacteria	Proteobacteria	Gammaproteobacteria	Enterobacterales	Morganellaceae	Providencia	Providencia stuartii
471875.6	Ruminococcus lactaris ATCC 29176	Bacteria	Firmicutes	Clostridia	Clostridiales	Ruminococcaceae	Ruminococcus	Ruminococcus lactaris
471881.3	Proteus penneri ATCC 35198	Bacteria	Proteobacteria	Gammaproteobacteria	Enterobacterales	Morganellaceae	Proteus	Proteus penneri
473819.7	Bifidobacterium dentium ATCC 27678	Bacteria	Actinobacteria	Actinobacteria	Bifidobacteriales	Bifidobacteriaceae	Bifidobacterium	Bifidobacterium dentium
474186.5	Enterococcus faecalis OG1RF	Bacteria	Firmicutes	Bacilli	Lactobacillales	Enterococcaceae	Enterococcus	Enterococcus faecalis
474960.5	Hydrogenoanaerobacterium saccharovorans strain DSM 24774	Bacteria	Firmicutes	Clostridia	Clostridiales	Ruminococcaceae	Hydrogenoanaerobacterium	Hydrogenoanaerobacterium saccharovorans
476272.5	Blautia hydrogenotrophica DSM 10507	Bacteria	Firmicutes	Clostridia	Clostridiales	Lachnospiraceae	Blautia	Blautia hydrogenotrophica
477228.3	Pseudomonas stutzeri TS44	Bacteria	Proteobacteria	Gammaproteobacteria	Pseudomonadales	Pseudomonadaceae	Pseudomonas	Pseudomonas stutzeri
478749.5	Bryantella formatexigens DSM 14469	Bacteria	Firmicutes	Clostridia	Clostridiales	Lachnospiraceae	Marvinbryantia	Marvinbryantia formatexigens
478801.5	Kytococcus sedentarius DSM 20547	Bacteria	Actinobacteria	Actinobacteria	Micrococcales	Dermacoccaceae	Kytococcus	Kytococcus sedentarius
479436.6	Veillonella parvula DSM 2008	Bacteria	Firmicutes	Negativicutes	Veillonellales	Veillonellaceae	Veillonella	Veillonella parvula
479437.5	Eggerthella lenta DSM 2243	Bacteria	Actinobacteria	Coriobacteriia	Eggerthellales	Eggerthellaceae	Eggerthella	Eggerthella lenta
479832.7	Clostridium difficile QCD-76w55	Bacteria	Firmicutes	Clostridia	Clostridiales	Peptostreptococcaceae	Clostridioides	Clostridioides difficile
480119.5	Acinetobacter baumannii AB0057	Bacteria	Proteobacteria	Gammaproteobacteria	Pseudomonadales	Moraxellaceae	Acinetobacter	Acinetobacter baumannii
481805.6	Escherichia coli ATCC 8739	Bacteria	Proteobacteria	Gammaproteobacteria	Enterobacterales	Enterobacteriaceae	Escherichia	Escherichia coli
483215.6	Bacteroides finegoldii DSM 17565	Bacteria	Bacteroidetes	Bacteroidia	Bacteroidales	Bacteroidaceae	Bacteroides	Bacteroides finegoldii
483216.6	Bacteroides eggerthii DSM 20697	Bacteria	Bacteroidetes	Bacteroidia	Bacteroidales	Bacteroidaceae	Bacteroides	Bacteroides eggerthii
483217.6	Bacteroides dorei DSM 17855	Bacteria	Bacteroidetes	Bacteroidia	Bacteroidales	Bacteroidaceae	Bacteroides	Bacteroides dorei
483218.5	Bacteroides pectinophilus ATCC 43243	Bacteria	Firmicutes	Clostridia	Clostridiales	-	-	[Bacteroides] pectinophilus
484018.6	Bacteroides plebeius DSM 17135	Bacteria	Bacteroidetes	Bacteroidia	Bacteroidales	Bacteroidaceae	Bacteroides	Bacteroides plebeius
484021.4	Klebsiella pneumoniae NTUH-K2044	Bacteria	Proteobacteria	Gammaproteobacteria	Enterobacterales	Enterobacteriaceae	Klebsiella	Klebsiella pneumoniae
484021.57	Klebsiella pneumoniae subsp. pneumoniae NTUH-K2044	Bacteria	Proteobacteria	Gammaproteobacteria	Enterobacterales	Enterobacteriaceae	Klebsiella	Klebsiella pneumoniae
485916.5	Desulfotomaculum acetoxidans DSM 771	Bacteria	Firmicutes	Clostridia	Clostridiales	Peptococcaceae	Desulfotomaculum	Desulfotomaculum acetoxidans
487213.3	Streptococcus pneumoniae Taiwan19F-14	Bacteria	Firmicutes	Bacilli	Lactobacillales	Streptococcaceae	Streptococcus	Streptococcus pneumoniae
487214.5	Streptococcus pneumoniae Hungary19A-6	Bacteria	Firmicutes	Bacilli	Lactobacillales	Streptococcaceae	Streptococcus	Streptococcus pneumoniae
487215.4	Streptococcus pyogenes Alab49	Bacteria	Firmicutes	Bacilli	Lactobacillales	Streptococcaceae	Streptococcus	Streptococcus pyogenes
488221.3	Streptococcus pneumoniae 70585	Bacteria	Firmicutes	Bacilli	Lactobacillales	Streptococcaceae	Streptococcus	Streptococcus pneumoniae
488222.3	Streptococcus pneumoniae JJA	Bacteria	Firmicutes	Bacilli	Lactobacillales	Streptococcaceae	Streptococcus	Streptococcus pneumoniae
488223.4	Streptococcus pneumoniae P1031	Bacteria	Firmicutes	Bacilli	Lactobacillales	Streptococcaceae	Streptococcus	Streptococcus pneumoniae
491074.3	Enterococcus faecalis TX0104	Bacteria	Firmicutes	Bacilli	Lactobacillales	Enterococcaceae	Enterococcus	Enterococcus faecalis
491075.3	Enterococcus faecalis HH22	Bacteria	Firmicutes	Bacilli	Lactobacillales	Enterococcaceae	Enterococcus	Enterococcus faecalis
491076.4	Lactobacillus crispatus JV-V01	Bacteria	Firmicutes	Bacilli	Lactobacillales	Lactobacillaceae	Lactobacillus	Lactobacillus crispatus
491077.3	Lactobacillus reuteri SD2112	Bacteria	Firmicutes	Bacilli	Lactobacillales	Lactobacillaceae	Lactobacillus	Lactobacillus reuteri
497978.4	Acinetobacter baumannii MDR-ZJ06	Bacteria	Proteobacteria	Gammaproteobacteria	Pseudomonadales	Moraxellaceae	Acinetobacter	Acinetobacter baumannii
498216.5	Lactobacillus casei str. Zhang	Bacteria	Firmicutes	Bacilli	Lactobacillales	Lactobacillaceae	Lactobacillus	Lactobacillus casei
498217.4	Edwardsiella tarda EIB202	Bacteria	Proteobacteria	Gammaproteobacteria	Enterobacterales	Hafniaceae	Edwardsiella	Edwardsiella tarda
499175.4	Clostridium difficile ATCC 43255	Bacteria	Firmicutes	Clostridia	Clostridiales	Peptostreptococcaceae	Clostridioides	Clostridioides difficile
499177.3	Clostridium sticklandii DSM 519	Bacteria	Firmicutes	Clostridia	Clostridiales	Peptostreptococcaceae	Acetoanaerobium	Acetoanaerobium sticklandii
500632.7	Clostridium nexile DSM 1787	Bacteria	Firmicutes	Clostridia	Clostridiales	Lachnospiraceae	Tyzzerella	Tyzzerella nexilis
500633.7	Clostridium hiranonis DSM 13275	Bacteria	Firmicutes	Clostridia	Clostridiales	Peptostreptococcaceae	-	[Clostridium] hiranonis
500634.6	Bifidobacterium bifidum ATCC 29521 = JCM 1255 = DSM 20456	Bacteria	Actinobacteria	Actinobacteria	Bifidobacteriales	Bifidobacteriaceae	Bifidobacterium	Bifidobacterium bifidum
500635.8	Mitsuokella multacida DSM 20544	Bacteria	Firmicutes	Negativicutes	Selenomonadales	Selenomonadaceae	Mitsuokella	Mitsuokella multacida
500637.6	Providencia rustigianii DSM 4541	Bacteria	Proteobacteria	Gammaproteobacteria	Enterobacterales	Morganellaceae	Providencia	Providencia rustigianii
500638.3	Edwardsiella tarda ATCC 23685	Bacteria	Proteobacteria	Gammaproteobacteria	Enterobacterales	Hafniaceae	Edwardsiella	Edwardsiella tarda
500639.8	Enterobacter cancerogenus ATCC 35316	Bacteria	Proteobacteria	Gammaproteobacteria	Enterobacterales	Enterobacteriaceae	Enterobacter	Enterobacter cloacae complex
500640.5	Citrobacter youngae ATCC 29220	Bacteria	Proteobacteria	Gammaproteobacteria	Enterobacterales	Enterobacteriaceae	Citrobacter	Citrobacter youngae
502346.5	Escherichia coli O157:H7 str. TW14588	Bacteria	Proteobacteria	Gammaproteobacteria	Enterobacterales	Enterobacteriaceae	Escherichia	Escherichia coli
502347.3	Escherichia albertii TW07627	Bacteria	Proteobacteria	Gammaproteobacteria	Enterobacterales	Enterobacteriaceae	Escherichia	Escherichia albertii
502558.4	Eggerthella sp. YY7918	Bacteria	Actinobacteria	Coriobacteriia	Eggerthellales	Eggerthellaceae	Eggerthella	-
502800.6	Yersinia pseudotuberculosis YPIII	Bacteria	Proteobacteria	Gammaproteobacteria	Enterobacterales	Yersiniaceae	Yersinia	Yersinia pseudotuberculosis
502801.6	Yersinia pseudotuberculosis PB1/+	Bacteria	Proteobacteria	Gammaproteobacteria	Enterobacterales	Yersiniaceae	Yersinia	Yersinia pseudotuberculosis
504472.7	Spirosoma linguale DSM 74	Bacteria	Bacteroidetes	Cytophagia	Cytophagales	Cytophagaceae	Spirosoma	Spirosoma linguale
505682.4	Ureaplasma parvum serovar 3 str. ATCC 27815	Bacteria	Tenericutes	Mollicutes	Mycoplasmatales	Mycoplasmataceae	Ureaplasma	Ureaplasma parvum
507522.6	Klebsiella pneumoniae 342	Bacteria	Proteobacteria	Gammaproteobacteria	Enterobacterales	Enterobacteriaceae	Klebsiella	Klebsiella pneumoniae
508765.6	Clostridium botulinum B str. Eklund 17B	Bacteria	Firmicutes	Clostridia	Clostridiales	Clostridiaceae	Clostridium	Clostridium botulinum
508767.5	Clostridium botulinum E3 str. Alaska E43	Bacteria	Firmicutes	Clostridia	Clostridiales	Clostridiaceae	Clostridium	Clostridium botulinum
509170.6	Acinetobacter baumannii SDF	Bacteria	Proteobacteria	Gammaproteobacteria	Pseudomonadales	Moraxellaceae	Acinetobacter	Acinetobacter baumannii
509173.8	Acinetobacter baumannii AYE	Bacteria	Proteobacteria	Gammaproteobacteria	Pseudomonadales	Moraxellaceae	Acinetobacter	Acinetobacter baumannii
511145.12	Escherichia coli str. K-12 substr. MG1655	Bacteria	Proteobacteria	Gammaproteobacteria	Enterobacterales	Enterobacteriaceae	Escherichia	Escherichia coli
511437.3	Lactobacillus buchneri NRRL B-30929	Bacteria	Firmicutes	Bacilli	Lactobacillales	Lactobacillaceae	Lactobacillus	Lactobacillus buchneri
511680.4	Butyrivibrio crossotus DSM 2876	Bacteria	Firmicutes	Clostridia	Clostridiales	Lachnospiraceae	Butyrivibrio	Butyrivibrio crossotus
511691.3	Streptococcus mutans NN2025	Bacteria	Firmicutes	Bacilli	Lactobacillales	Streptococcaceae	Streptococcus	Streptococcus mutans
511693.5	Escherichia coli BL21	Bacteria	Proteobacteria	Gammaproteobacteria	Enterobacterales	Enterobacteriaceae	Escherichia	Escherichia coli
512562.5	Helicobacter pylori Shi470	Bacteria	Proteobacteria	Epsilonproteobacteria	Campylobacterales	Helicobacteraceae	Helicobacter	Helicobacter pylori
512566.5	Streptococcus pneumoniae G54	Bacteria	Firmicutes	Bacilli	Lactobacillales	Streptococcaceae	Streptococcus	Streptococcus pneumoniae
515608.4	Ureaplasma parvum serovar 1 str. ATCC 27813	Bacteria	Tenericutes	Mollicutes	Mycoplasmatales	Mycoplasmataceae	Ureaplasma	Ureaplasma parvum
515609.4	Ureaplasma parvum serovar 14 str. ATCC 33697	Bacteria	Tenericutes	Mollicutes	Mycoplasmatales	Mycoplasmataceae	Ureaplasma	Ureaplasma parvum
515611.4	Ureaplasma urealyticum serovar 13 str. ATCC 33698	Bacteria	Tenericutes	Mollicutes	Mycoplasmatales	Mycoplasmataceae	Ureaplasma	Ureaplasma urealyticum
515619.6	Eubacterium rectale ATCC 33656	Bacteria	Firmicutes	Clostridia	Clostridiales	Lachnospiraceae	-	[Eubacterium] rectale
515620.4	Eubacterium eligens ATCC 27750	Bacteria	Firmicutes	Clostridia	Clostridiales	Eubacteriaceae	Eubacterium	[Eubacterium] eligens
515622.3	Butyrivibrio proteoclasticus B316	Bacteria	Firmicutes	Clostridia	Clostridiales	Lachnospiraceae	Butyrivibrio	Butyrivibrio proteoclasticus
516950.5	Streptococcus pneumoniae CGSP14	Bacteria	Firmicutes	Bacilli	Lactobacillales	Streptococcaceae	Streptococcus	Streptococcus pneumoniae
518603.4	Ureaplasma urealyticum serovar 5 str. ATCC 27817	Bacteria	Tenericutes	Mollicutes	Mycoplasmatales	Mycoplasmataceae	Ureaplasma	Ureaplasma urealyticum
518634.7	Bifidobacterium breve DSM 20213 = JCM 1192	Bacteria	Actinobacteria	Actinobacteria	Bifidobacteriales	Bifidobacteriaceae	Bifidobacterium	Bifidobacterium breve
518635.5	Bifidobacterium angulatum DSM 20098	Bacteria	Actinobacteria	Actinobacteria	Bifidobacteriales	Bifidobacteriaceae	Bifidobacterium	Bifidobacterium angulatum
518636.5	Clostridium asparagiforme DSM 15981	Bacteria	Firmicutes	Clostridia	Clostridiales	Lachnospiraceae	Lachnoclostridium	[Clostridium] asparagiforme
518637.5	Eubacterium biforme DSM 3989	Bacteria	Firmicutes	Erysipelotrichia	Erysipelotrichales	Erysipelotrichaceae	Holdemanella	Holdemanella biformis
519849.4	Ureaplasma urealyticum serovar 7 str. ATCC 27819	Bacteria	Tenericutes	Mollicutes	Mycoplasmatales	Mycoplasmataceae	Ureaplasma	Ureaplasma urealyticum
519851.4	Ureaplasma parvum serovar 6 str. ATCC 27818	Bacteria	Tenericutes	Mollicutes	Mycoplasmatales	Mycoplasmataceae	Ureaplasma	Ureaplasma parvum
520999.6	Providencia alcalifaciens DSM 30120	Bacteria	Proteobacteria	Gammaproteobacteria	Enterobacterales	Morganellaceae	Providencia	Providencia alcalifaciens
521000.6	Providencia rettgeri DSM 1131	Bacteria	Proteobacteria	Gammaproteobacteria	Enterobacterales	Morganellaceae	Providencia	Providencia rettgeri
521003.7	Collinsella intestinalis DSM 13280	Bacteria	Actinobacteria	Coriobacteriia	Coriobacteriales	Coriobacteriaceae	Collinsella	Collinsella intestinalis
521095.6	Atopobium parvulum DSM 20469	Bacteria	Actinobacteria	Coriobacteriia	Coriobacteriales	Atopobiaceae	Atopobium	Atopobium parvulum
521097.5	Capnocytophaga ochracea DSM 7271	Bacteria	Bacteroidetes	Flavobacteriia	Flavobacteriales	Flavobacteriaceae	Capnocytophaga	Capnocytophaga ochracea
522373.3	Stenotrophomonas maltophilia K279a	Bacteria	Proteobacteria	Gammaproteobacteria	Xanthomonadales	Xanthomonadaceae	Stenotrophomonas	Stenotrophomonas maltophilia
523794.5	Leptotrichia buccalis C-1013-b	Bacteria	Fusobacteria	Fusobacteriia	Fusobacteriales	Leptotrichiaceae	Leptotrichia	Leptotrichia buccalis
525146.4	Desulfovibrio desulfuricans subsp. desulfuricans str. ATCC 27774	Bacteria	Proteobacteria	Deltaproteobacteria	Desulfovibrionales	Desulfovibrionaceae	Desulfovibrio	Desulfovibrio desulfuricans
525242.3	Acinetobacter sp. 6014059	Bacteria	Proteobacteria	Gammaproteobacteria	Pseudomonadales	Moraxellaceae	Acinetobacter	Acinetobacter baumannii
525243.3	Acinetobacter sp. 6013150	Bacteria	Proteobacteria	Gammaproteobacteria	Pseudomonadales	Moraxellaceae	Acinetobacter	Acinetobacter baumannii
525244.5	Acinetobacter sp. ATCC 27244	Bacteria	Proteobacteria	Gammaproteobacteria	Pseudomonadales	Moraxellaceae	Acinetobacter	-
525246.3	Actinomyces urogenitalis DSM 15434	Bacteria	Actinobacteria	Actinobacteria	Actinomycetales	Actinomycetaceae	Actinomyces	Actinomyces urogenitalis
525254.4	Anaerococcus lactolyticus ATCC 51172	Bacteria	Firmicutes	Tissierellia	Tissierellales	Peptoniphilaceae	Anaerococcus	Anaerococcus lactolyticus
525255.3	Anaerococcus tetradius ATCC 35098	Bacteria	Firmicutes	Tissierellia	Tissierellales	Peptoniphilaceae	Anaerococcus	Anaerococcus tetradius
525256.4	Atopobium vaginae DSM 15829	Bacteria	Actinobacteria	Coriobacteriia	Coriobacteriales	Atopobiaceae	Atopobium	Atopobium vaginae
525258.3	Clostridium difficile NAP07	Bacteria	Firmicutes	Clostridia	Clostridiales	Peptostreptococcaceae	Clostridioides	Clostridioides difficile
525259.3	Clostridium difficile NAP08	Bacteria	Firmicutes	Clostridia	Clostridiales	Peptostreptococcaceae	Clostridioides	Clostridioides difficile
525268.3	Corynebacterium striatum ATCC 6940	Bacteria	Actinobacteria	Actinobacteria	Corynebacteriales	Corynebacteriaceae	Corynebacterium	Corynebacterium striatum
525271.4	Enterococcus faecalis ATCC 29200	Bacteria	Firmicutes	Bacilli	Lactobacillales	Enterococcaceae	Enterococcus	Enterococcus faecalis
525278.3	Enterococcus faecalis TX1322	Bacteria	Firmicutes	Bacilli	Lactobacillales	Enterococcaceae	Enterococcus	Enterococcus faecalis
525279.3	Enterococcus faecium TX1330	Bacteria	Firmicutes	Bacilli	Lactobacillales	Enterococcaceae	Enterococcus	Enterococcus faecium
525281.3	Escherichia coli 83972	Bacteria	Proteobacteria	Gammaproteobacteria	Enterobacterales	Enterobacteriaceae	Escherichia	Escherichia coli
525282.5	Finegoldia magna ATCC 53516	Bacteria	Firmicutes	Tissierellia	Tissierellales	Peptoniphilaceae	Finegoldia	Finegoldia magna
525283.3	Fusobacterium nucleatum subsp. nucleatum ATCC 23726	Bacteria	Fusobacteria	Fusobacteriia	Fusobacteriales	Fusobacteriaceae	Fusobacterium	Fusobacterium nucleatum
525306.3	Lactobacillus acidophilus ATCC 4796	Bacteria	Firmicutes	Bacilli	Lactobacillales	Lactobacillaceae	Lactobacillus	Lactobacillus acidophilus
525309.3	Lactobacillus antri DSM 16041	Bacteria	Firmicutes	Bacilli	Lactobacillales	Lactobacillaceae	Lactobacillus	Lactobacillus antri
525310.3	Lactobacillus brevis subsp. gravesensis ATCC 27305	Bacteria	Firmicutes	Bacilli	Lactobacillales	Lactobacillaceae	Lactobacillus	Lactobacillus brevis
525318.3	Lactobacillus buchneri ATCC 11577	Bacteria	Firmicutes	Bacilli	Lactobacillales	Lactobacillaceae	Lactobacillus	Lactobacillus buchneri
525325.3	Lactobacillus fermentum ATCC 14931	Bacteria	Firmicutes	Bacilli	Lactobacillales	Lactobacillaceae	Lactobacillus	Lactobacillus fermentum
525326.3	Lactobacillus gasseri JV-V03	Bacteria	Firmicutes	Bacilli	Lactobacillales	Lactobacillaceae	Lactobacillus	Lactobacillus gasseri
525327.3	Lactobacillus hilgardii ATCC 8290	Bacteria	Firmicutes	Bacilli	Lactobacillales	Lactobacillaceae	Lactobacillus	Lactobacillus hilgardii
525328.4	Lactobacillus iners DSM 13335	Bacteria	Firmicutes	Bacilli	Lactobacillales	Lactobacillaceae	Lactobacillus	Lactobacillus iners
525329.3	Lactobacillus jensenii JV-V16	Bacteria	Firmicutes	Bacilli	Lactobacillales	Lactobacillaceae	Lactobacillus	Lactobacillus jensenii
525330.3	Lactobacillus johnsonii ATCC 33200	Bacteria	Firmicutes	Bacilli	Lactobacillales	Lactobacillaceae	Lactobacillus	Lactobacillus johnsonii
525337.3	Lactobacillus paracasei subsp. paracasei ATCC 25302	Bacteria	Firmicutes	Bacilli	Lactobacillales	Lactobacillaceae	Lactobacillus	Lactobacillus paracasei
525338.3	Lactobacillus plantarum subsp. plantarum ATCC 14917	Bacteria	Firmicutes	Bacilli	Lactobacillales	Lactobacillaceae	Lactobacillus	Lactobacillus plantarum
525341.3	Lactobacillus reuteri CF48-3A	Bacteria	Firmicutes	Bacilli	Lactobacillales	Lactobacillaceae	Lactobacillus	Lactobacillus reuteri
525361.3	Lactobacillus rhamnosus LMS2-1	Bacteria	Firmicutes	Bacilli	Lactobacillales	Lactobacillaceae	Lactobacillus	Lactobacillus rhamnosus
525362.3	Lactobacillus ruminis ATCC 25644	Bacteria	Firmicutes	Bacilli	Lactobacillales	Lactobacillaceae	Lactobacillus	Lactobacillus ruminis
525364.3	Lactobacillus salivarius ATCC 11741	Bacteria	Firmicutes	Bacilli	Lactobacillales	Lactobacillaceae	Lactobacillus	Lactobacillus salivarius
525365.3	Lactobacillus ultunensis DSM 16047	Bacteria	Firmicutes	Bacilli	Lactobacillales	Lactobacillaceae	Lactobacillus	Lactobacillus ultunensis
525366.3	Lactobacillus vaginalis ATCC 49540	Bacteria	Firmicutes	Bacilli	Lactobacillales	Lactobacillaceae	Lactobacillus	Lactobacillus vaginalis
525367.9	Listeria grayi DSM 20601	Bacteria	Firmicutes	Bacilli	Bacillales	Listeriaceae	Listeria	Listeria grayi
525369.4	Proteus mirabilis ATCC 29906	Bacteria	Proteobacteria	Gammaproteobacteria	Enterobacterales	Morganellaceae	Proteus	Proteus mirabilis
525370.3	Rhodococcus equi ATCC 33707	Bacteria	Actinobacteria	Actinobacteria	Corynebacteriales	Nocardiaceae	Rhodococcus	Rhodococcus hoagii
525371.3	Roseomonas cervicalis ATCC 49957	Bacteria	Proteobacteria	Alphaproteobacteria	Rhodospirillales	Acetobacteraceae	Roseomonas	Roseomonas cervicalis
525374.3	Staphylococcus epidermidis BCM-HMP0060	Bacteria	Firmicutes	Bacilli	Bacillales	Staphylococcaceae	Staphylococcus	Staphylococcus epidermidis
525375.3	Staphylococcus epidermidis M23864:W2(grey)	Bacteria	Firmicutes	Bacilli	Bacillales	Staphylococcaceae	Staphylococcus	Staphylococcus epidermidis
525376.3	Staphylococcus epidermidis W23144	Bacteria	Firmicutes	Bacilli	Bacillales	Staphylococcaceae	Staphylococcus	Staphylococcus epidermidis
525377.3	Staphylococcus lugdunensis M23590	Bacteria	Firmicutes	Bacilli	Bacillales	Staphylococcaceae	Staphylococcus	Staphylococcus lugdunensis
525378.3	Staphylococcus epidermidis M23864:W1	Bacteria	Firmicutes	Bacilli	Bacillales	Staphylococcaceae	Staphylococcus	Staphylococcus caprae
525379.3	Streptococcus equinus ATCC 9812	Bacteria	Firmicutes	Bacilli	Lactobacillales	Streptococcaceae	Streptococcus	Streptococcus equinus
525381.4	Streptococcus pneumoniae TCH8431/19A	Bacteria	Firmicutes	Bacilli	Lactobacillales	Streptococcaceae	Streptococcus	Streptococcus pneumoniae
525919.6	Anaerococcus prevotii DSM 20548	Bacteria	Firmicutes	Tissierellia	Tissierellales	Peptoniphilaceae	Anaerococcus	Anaerococcus prevotii
526347.4	Ureaplasma urealyticum serovar 11 str. ATCC 33695	Bacteria	Tenericutes	Mollicutes	Mycoplasmatales	Mycoplasmataceae	Ureaplasma	Ureaplasma urealyticum
526967.3	Bacillus cereus 172560W	Bacteria	Firmicutes	Bacilli	Bacillales	Bacillaceae	Bacillus	Bacillus cereus
526969.3	Bacillus cereus m1550	Bacteria	Firmicutes	Bacilli	Bacillales	Bacillaceae	Bacillus	Bacillus cereus
526970.3	Bacillus cereus BGSC 6E1	Bacteria	Firmicutes	Bacilli	Bacillales	Bacillaceae	Bacillus	Bacillus cereus
526971.3	Bacillus cereus MM3	Bacteria	Firmicutes	Bacilli	Bacillales	Bacillaceae	Bacillus	Bacillus cereus
526972.3	Bacillus cereus AH621	Bacteria	Firmicutes	Bacilli	Bacillales	Bacillaceae	Bacillus	Bacillus cereus
526974.3	Bacillus cereus BDRD-ST24	Bacteria	Firmicutes	Bacilli	Bacillales	Bacillaceae	Bacillus	Bacillus cereus
526975.3	Bacillus cereus BDRD-ST26	Bacteria	Firmicutes	Bacilli	Bacillales	Bacillaceae	Bacillus	Bacillus cereus
526976.3	Bacillus cereus BDRD-ST196	Bacteria	Firmicutes	Bacilli	Bacillales	Bacillaceae	Bacillus	Bacillus cereus
526977.3	Bacillus cereus ATCC 4342	Bacteria	Firmicutes	Bacilli	Bacillales	Bacillaceae	Bacillus	Bacillus cereus
526978.3	Bacillus cereus BDRD-Cer4	Bacteria	Firmicutes	Bacilli	Bacillales	Bacillaceae	Bacillus	Bacillus cereus
526979.3	Bacillus cereus 95/8201	Bacteria	Firmicutes	Bacilli	Bacillales	Bacillaceae	Bacillus	Bacillus cereus
526980.3	Bacillus cereus ATCC 10876	Bacteria	Firmicutes	Bacilli	Bacillales	Bacillaceae	Bacillus	Bacillus cereus
526981.3	Bacillus cereus Rock1-3	Bacteria	Firmicutes	Bacilli	Bacillales	Bacillaceae	Bacillus	Bacillus cereus
526982.3	Bacillus cereus Rock1-15	Bacteria	Firmicutes	Bacilli	Bacillales	Bacillaceae	Bacillus	Bacillus cereus
526983.3	Bacillus cereus Rock3-28	Bacteria	Firmicutes	Bacilli	Bacillales	Bacillaceae	Bacillus	Bacillus cereus
526984.3	Bacillus cereus Rock3-29	Bacteria	Firmicutes	Bacilli	Bacillales	Bacillaceae	Bacillus	Bacillus cereus
526985.3	Bacillus cereus Rock3-42	Bacteria	Firmicutes	Bacilli	Bacillales	Bacillaceae	Bacillus	Bacillus cereus
526986.3	Bacillus cereus Rock3-44	Bacteria	Firmicutes	Bacilli	Bacillales	Bacillaceae	Bacillus	Bacillus cereus
526987.3	Bacillus cereus Rock4-2	Bacteria	Firmicutes	Bacilli	Bacillales	Bacillaceae	Bacillus	Bacillus cereus
526988.3	Bacillus cereus Rock4-18	Bacteria	Firmicutes	Bacilli	Bacillales	Bacillaceae	Bacillus	Bacillus cereus
526989.3	Bacillus cereus F65185	Bacteria	Firmicutes	Bacilli	Bacillales	Bacillaceae	Bacillus	Bacillus cereus
526990.3	Bacillus cereus AH603	Bacteria	Firmicutes	Bacilli	Bacillales	Bacillaceae	Bacillus	Bacillus cereus
526991.3	Bacillus cereus AH676	Bacteria	Firmicutes	Bacilli	Bacillales	Bacillaceae	Bacillus	Bacillus cereus
526992.3	Bacillus cereus AH1271	Bacteria	Firmicutes	Bacilli	Bacillales	Bacillaceae	Bacillus	Bacillus cereus
526993.3	Bacillus cereus AH1272	Bacteria	Firmicutes	Bacilli	Bacillales	Bacillaceae	Bacillus	Bacillus cereus
526994.3	Bacillus cereus AH1273	Bacteria	Firmicutes	Bacilli	Bacillales	Bacillaceae	Bacillus	Bacillus cereus
526997.3	Bacillus mycoides DSM 2048	Bacteria	Firmicutes	Bacilli	Bacillales	Bacillaceae	Bacillus	Bacillus mycoides
526998.3	Bacillus mycoides Rock1-4	Bacteria	Firmicutes	Bacilli	Bacillales	Bacillaceae	Bacillus	Bacillus mycoides
527004.3	Yersinia rohdei ATCC 43380	Bacteria	Proteobacteria	Gammaproteobacteria	Enterobacterales	Yersiniaceae	Yersinia	Yersinia rohdei
527019.3	Bacillus thuringiensis IBL 200	Bacteria	Firmicutes	Bacilli	Bacillales	Bacillaceae	Bacillus	Bacillus thuringiensis
527020.3	Bacillus thuringiensis IBL 4222	Bacteria	Firmicutes	Bacilli	Bacillales	Bacillaceae	Bacillus	Bacillus thuringiensis
527021.3	Bacillus thuringiensis Bt407	Bacteria	Firmicutes	Bacilli	Bacillales	Bacillaceae	Bacillus	Bacillus thuringiensis
527022.3	Bacillus thuringiensis serovar monterrey BGSC 4AJ1	Bacteria	Firmicutes	Bacilli	Bacillales	Bacillaceae	Bacillus	Bacillus thuringiensis
527023.3	Bacillus thuringiensis serovar kurstaki str. T03a001	Bacteria	Firmicutes	Bacilli	Bacillales	Bacillaceae	Bacillus	Bacillus thuringiensis
527024.3	Bacillus thuringiensis serovar tochigiensis BGSC 4Y1	Bacteria	Firmicutes	Bacilli	Bacillales	Bacillaceae	Bacillus	Bacillus thuringiensis
527025.3	Bacillus thuringiensis serovar thuringiensis str. T01001	Bacteria	Firmicutes	Bacilli	Bacillales	Bacillaceae	Bacillus	Bacillus thuringiensis
527026.3	Bacillus thuringiensis serovar sotto str. T04001	Bacteria	Firmicutes	Bacilli	Bacillales	Bacillaceae	Bacillus	Bacillus thuringiensis
527027.3	Bacillus thuringiensis serovar pakistani str. T13001	Bacteria	Firmicutes	Bacilli	Bacillales	Bacillaceae	Bacillus	Bacillus thuringiensis
527028.3	Bacillus thuringiensis serovar pulsiensis BGSC 4CC1	Bacteria	Firmicutes	Bacilli	Bacillales	Bacillaceae	Bacillus	Bacillus thuringiensis
527029.3	Bacillus thuringiensis serovar pondicheriensis BGSC 4BA1	Bacteria	Firmicutes	Bacilli	Bacillales	Bacillaceae	Bacillus	Bacillus thuringiensis
527030.3	Bacillus thuringiensis serovar huazhongensis BGSC 4BD1	Bacteria	Firmicutes	Bacilli	Bacillales	Bacillaceae	Bacillus	Bacillus thuringiensis
527031.3	Bacillus thuringiensis serovar berliner ATCC 10792	Bacteria	Firmicutes	Bacilli	Bacillales	Bacillaceae	Bacillus	Bacillus thuringiensis
527032.3	Bacillus thuringiensis serovar andalousiensis BGSC 4AW1	Bacteria	Firmicutes	Bacilli	Bacillales	Bacillaceae	Bacillus	Bacillus thuringiensis
529507.6	Proteus mirabilis HI4320	Bacteria	Proteobacteria	Gammaproteobacteria	Enterobacterales	Morganellaceae	Proteus	Proteus mirabilis
536056.3	Escherichia coli DH1	Bacteria	Proteobacteria	Gammaproteobacteria	Enterobacterales	Enterobacteriaceae	Escherichia	Escherichia coli
536231.5	Roseburia intestinalis L1-82	Bacteria	Firmicutes	Clostridia	Clostridiales	Lachnospiraceae	Roseburia	Roseburia intestinalis
536233.3	Clostridium botulinum E1 str. 'BoNT E Beluga'	Bacteria	Firmicutes	Clostridia	Clostridiales	Clostridiaceae	Clostridium	Clostridium botulinum
536633.3	Blautia glucerasea LFYP119	Bacteria	Firmicutes	Clostridia	Clostridiales	Lachnospiraceae	Blautia	Blautia glucerasea
536633.6	Blautia glucerasea strain MSK.20.42	Bacteria	Firmicutes	Clostridia	Clostridiales	Lachnospiraceae	Blautia	Blautia glucerasea
537006.5	Parabacteroides johnsonii DSM 18315	Bacteria	Bacteroidetes	Bacteroidia	Bacteroidales	Tannerellaceae	Parabacteroides	Parabacteroides johnsonii
537007.6	Blautia hansenii DSM 20583	Bacteria	Firmicutes	Clostridia	Clostridiales	Lachnospiraceae	Blautia	Blautia hansenii
537010.4	Desulfitobacterium hafniense DP7	Bacteria	Firmicutes	Clostridia	Clostridiales	Peptococcaceae	Desulfitobacterium	Desulfitobacterium hafniense
537011.5	Prevotella copri DSM 18205	Bacteria	Bacteroidetes	Bacteroidia	Bacteroidales	Prevotellaceae	Prevotella	Prevotella copri
537012.5	Bacteroides cellulosilyticus DSM 14838	Bacteria	Bacteroidetes	Bacteroidia	Bacteroidales	Bacteroidaceae	Bacteroides	Bacteroides cellulosilyticus
537013.3	Clostridium methylpentosum DSM 5476	Bacteria	Firmicutes	Clostridia	Clostridiales	Ruminococcaceae	Ruminiclostridium	[Clostridium] methylpentosum
537937.5	Bifidobacterium longum subsp. longum CCUG 52486	Bacteria	Actinobacteria	Actinobacteria	Bifidobacteriales	Bifidobacteriaceae	Bifidobacterium	Bifidobacterium longum
537970.5	Helicobacter canadensis MIT 98-5491	Bacteria	Proteobacteria	Epsilonproteobacteria	Campylobacterales	Helicobacteraceae	Helicobacter	Helicobacter canadensis
537971.5	Helicobacter cinaedi CCUG 18818	Bacteria	Proteobacteria	Epsilonproteobacteria	Campylobacterales	Helicobacteraceae	Helicobacter	Helicobacter cinaedi
537972.5	Helicobacter pullorum MIT 98-5489	Bacteria	Proteobacteria	Epsilonproteobacteria	Campylobacterales	Helicobacteraceae	Helicobacter	Helicobacter pullorum
537973.8	Lactobacillus paracasei subsp. paracasei 8700:2	Bacteria	Firmicutes	Bacilli	Lactobacillales	Lactobacillaceae	Lactobacillus	Lactobacillus paracasei
541229.3	Bacillus thuringiensis serovar chinensis CT-43	Bacteria	Firmicutes	Bacilli	Bacillales	Bacillaceae	Bacillus	Bacillus thuringiensis
543734.4	Lactobacillus casei BL23	Bacteria	Firmicutes	Bacilli	Lactobacillales	Lactobacillaceae	Lactobacillus	Lactobacillus casei
544404.4	Escherichia coli O157:H7 str. TW14359	Bacteria	Proteobacteria	Gammaproteobacteria	Enterobacterales	Enterobacteriaceae	Escherichia	Escherichia coli
544580.10	Actinomyces oris strain T14V	Bacteria	Actinobacteria	Actinobacteria	Actinomycetales	Actinomycetaceae	Actinomyces	Actinomyces oris
544644.3	Butyricimonas synergistica strain 43_13	Bacteria	Bacteroidetes	Bacteroidia	Bacteroidales	Odoribacteraceae	Butyricimonas	Butyricimonas synergistica
545693.3	Bacillus megaterium QM B1551	Bacteria	Firmicutes	Bacilli	Bacillales	Bacillaceae	Bacillus	Bacillus megaterium
545696.5	Holdemania filiformis DSM 12042	Bacteria	Firmicutes	Erysipelotrichia	Erysipelotrichales	Erysipelotrichaceae	Holdemania	Holdemania filiformis
545697.3	Clostridium celatum DSM 1785	Bacteria	Firmicutes	Clostridia	Clostridiales	Clostridiaceae	Clostridium	Clostridium celatum
545774.3	Streptococcus gallolyticus subsp. gallolyticus TX20005	Bacteria	Firmicutes	Bacilli	Lactobacillales	Streptococcaceae	Streptococcus	Streptococcus gallolyticus
546262.4	Neisseria cinerea ATCC 14685	Bacteria	Proteobacteria	Betaproteobacteria	Neisseriales	Neisseriaceae	Neisseria	Neisseria cinerea
546263.7	Neisseria elongata subsp. glycolytica ATCC 29315	Bacteria	Proteobacteria	Betaproteobacteria	Neisseriales	Neisseriaceae	Neisseria	Neisseria elongata
546264.5	Neisseria flavescens NRL30031/H210	Bacteria	Proteobacteria	Betaproteobacteria	Neisseriales	Neisseriaceae	Neisseria	Neisseria flavescens
546265.5	Neisseria lactamica ATCC 23970	Bacteria	Proteobacteria	Betaproteobacteria	Neisseriales	Neisseriaceae	Neisseria	Neisseria lactamica
546266.6	Neisseria mucosa ATCC 25996	Bacteria	Proteobacteria	Betaproteobacteria	Neisseriales	Neisseriaceae	Neisseria	Neisseria mucosa
546268.4	Neisseria subflava NJ9703	Bacteria	Proteobacteria	Betaproteobacteria	Neisseriales	Neisseriaceae	Neisseria	Neisseria subflava
546269.3	Filifactor alocis ATCC 35896	Bacteria	Firmicutes	Clostridia	Clostridiales	Peptostreptococcaceae	Filifactor	Filifactor alocis
546270.5	Gemella haemolysans ATCC 10379	Bacteria	Firmicutes	Bacilli	Bacillales	Bacillales Family XI. Incertae Sedis	Gemella	Gemella haemolysans
546271.3	Selenomonas sputigena ATCC 35185	Bacteria	Firmicutes	Negativicutes	Selenomonadales	Selenomonadaceae	Selenomonas	Selenomonas sputigena
546273.3	Veillonella dispar ATCC 17748	Bacteria	Firmicutes	Negativicutes	Veillonellales	Veillonellaceae	Veillonella	Veillonella dispar
546274.4	Eikenella corrodens ATCC 23834	Bacteria	Proteobacteria	Betaproteobacteria	Neisseriales	Neisseriaceae	Eikenella	Eikenella corrodens
546275.3	Fusobacterium periodonticum ATCC 33693	Bacteria	Fusobacteria	Fusobacteriia	Fusobacteriales	Fusobacteriaceae	Fusobacterium	Fusobacterium periodonticum
546342.4	Staphylococcus aureus subsp. aureus str. JKD6008	Bacteria	Firmicutes	Bacilli	Bacillales	Staphylococcaceae	Staphylococcus	Staphylococcus aureus
547042.5	Bacteroides coprophilus DSM 18228	Bacteria	Bacteroidetes	Bacteroidia	Bacteroidales	Bacteroidaceae	Bacteroides	Bacteroides coprophilus
547043.16	Bifidobacterium pseudocatenulatum DSM 20438 = JCM 1200 = LMG 10505	Bacteria	Actinobacteria	Actinobacteria	Bifidobacteriales	Bifidobacteriaceae	Bifidobacterium	Bifidobacterium pseudocatenulatum
548470.3	Staphylococcus aureus subsp. aureus MN8	Bacteria	Firmicutes	Bacilli	Bacillales	Staphylococcaceae	Staphylococcus	Staphylococcus aureus
548473.6	Staphylococcus aureus subsp. aureus TCH60	Bacteria	Firmicutes	Bacilli	Bacillales	Staphylococcaceae	Staphylococcus	Staphylococcus aureus
548474.3	Staphylococcus aureus subsp. aureus TCH130	Bacteria	Firmicutes	Bacilli	Bacillales	Staphylococcaceae	Staphylococcus	Staphylococcus aureus
548475.3	Staphylococcus aureus subsp. aureus TCH70	Bacteria	Firmicutes	Bacilli	Bacillales	Staphylococcaceae	Staphylococcus	Staphylococcus aureus
548476.3	Corynebacterium aurimucosum ATCC 700975	Bacteria	Actinobacteria	Actinobacteria	Corynebacteriales	Corynebacteriaceae	Corynebacterium	Corynebacterium aurimucosum
548477.4	Corynebacterium glucuronolyticum ATCC 51867	Bacteria	Actinobacteria	Actinobacteria	Corynebacteriales	Corynebacteriaceae	Corynebacterium	Corynebacterium glucuronolyticum
548478.3	Corynebacterium glucuronolyticum ATCC 51866	Bacteria	Actinobacteria	Actinobacteria	Corynebacteriales	Corynebacteriaceae	Corynebacterium	Corynebacterium glucuronolyticum
548479.6	Mobiluncus curtisii ATCC 43063	Bacteria	Actinobacteria	Actinobacteria	Actinomycetales	Actinomycetaceae	Mobiluncus	Mobiluncus curtisii
548480.3	Bifidobacterium longum subsp. longum ATCC 55813	Bacteria	Actinobacteria	Actinobacteria	Bifidobacteriales	Bifidobacteriaceae	Bifidobacterium	Bifidobacterium longum
548485.3	Lactobacillus reuteri MM4-1A	Bacteria	Firmicutes	Bacilli	Lactobacillales	Lactobacillaceae	Lactobacillus	Lactobacillus reuteri
550537.5	Salmonella enterica subsp. enterica serovar Enteritidis str.	Bacteria	Proteobacteria	Gammaproteobacteria	Enterobacterales	Enterobacteriaceae	Salmonella	Salmonella enterica
550538.5	Salmonella enterica subsp. enterica serovar Gallinarum str. 287/91	Bacteria	Proteobacteria	Gammaproteobacteria	Enterobacterales	Enterobacteriaceae	Salmonella	Salmonella enterica
550694.3	Escherichia fergusonii B253	Bacteria	Proteobacteria	Gammaproteobacteria	Enterobacterales	Enterobacteriaceae	Escherichia	Escherichia fergusonii
550747.4	Ureaplasma urealyticum serovar 12 str. ATCC 33696	Bacteria	Tenericutes	Mollicutes	Mycoplasmatales	Mycoplasmataceae	Ureaplasma	Ureaplasma urealyticum
550748.4	Ureaplasma urealyticum serovar 4 str. ATCC 27816	Bacteria	Tenericutes	Mollicutes	Mycoplasmatales	Mycoplasmataceae	Ureaplasma	Ureaplasma urealyticum
550773.4	Ureaplasma urealyticum serovar 9 str. ATCC 33175	Bacteria	Tenericutes	Mollicutes	Mycoplasmatales	Mycoplasmataceae	Ureaplasma	Ureaplasma urealyticum
552395.3	Lachnospiraceae bacterium 4_1_37FAA	Bacteria	Firmicutes	Clostridia	Clostridiales	Lachnospiraceae	-	-
552396.3	Erysipelotrichaceae bacterium 5_2_54FAA	Bacteria	Firmicutes	Erysipelotrichia	Erysipelotrichales	Erysipelotrichaceae	-	-
552398.3	Ruminococcaceae bacterium D16	Bacteria	Firmicutes	Clostridia	Clostridiales	Ruminococcaceae	-	-
552526.8	Streptococcus equi subsp. zooepidemicus MGCS10565	Bacteria	Firmicutes	Bacilli	Lactobacillales	Streptococcaceae	Streptococcus	Streptococcus equi
552531.3	Bifidobacterium animalis subsp. lactis BB-12	Bacteria	Actinobacteria	Actinobacteria	Bifidobacteriales	Bifidobacteriaceae	Bifidobacterium	Bifidobacterium animalis
552536.6	Listeria monocytogenes HCC23	Bacteria	Firmicutes	Bacilli	Bacillales	Listeriaceae	Listeria	Listeria monocytogenes
553171.3	Prevotella bivia JCVIHMP010	Bacteria	Bacteroidetes	Bacteroidia	Bacteroidales	Prevotellaceae	Prevotella	Prevotella bivia
553174.6	Prevotella melaninogenica ATCC 25845	Bacteria	Bacteroidetes	Bacteroidia	Bacteroidales	Prevotellaceae	Prevotella	Prevotella melaninogenica
553175.3	Porphyromonas endodontalis ATCC 35406	Bacteria	Bacteroidetes	Bacteroidia	Bacteroidales	Porphyromonadaceae	Porphyromonas	Porphyromonas endodontalis
553177.6	Capnocytophaga sputigena ATCC 33612	Bacteria	Bacteroidetes	Flavobacteriia	Flavobacteriales	Flavobacteriaceae	Capnocytophaga	Capnocytophaga sputigena
553184.4	Atopobium rimae ATCC 49626	Bacteria	Actinobacteria	Coriobacteriia	Coriobacteriales	Atopobiaceae	Atopobium	Atopobium rimae
553191.3	Bifidobacterium dentium JCVIHMP022	Bacteria	Actinobacteria	Actinobacteria	Bifidobacteriales	Bifidobacteriaceae	Bifidobacterium	Bifidobacterium dentium
553199.9	Propionibacterium acnes SK137	Bacteria	Actinobacteria	Actinobacteria	Propionibacteriales	Propionibacteriaceae	Cutibacterium	Cutibacterium acnes
553201.3	Rothia mucilaginosa ATCC 25296	Bacteria	Actinobacteria	Actinobacteria	Micrococcales	Micrococcaceae	Rothia	Rothia mucilaginosa
553204.6	Corynebacterium amycolatum SK46	Bacteria	Actinobacteria	Actinobacteria	Corynebacteriales	Corynebacteriaceae	Corynebacterium	Corynebacterium amycolatum
553206.4	Corynebacterium tuberculostearicum SK141	Bacteria	Actinobacteria	Actinobacteria	Corynebacteriales	Corynebacteriaceae	Corynebacterium	Corynebacterium tuberculostearicum
553209.3	Enterococcus faecalis TUSoD Ef11	Bacteria	Firmicutes	Bacilli	Lactobacillales	Enterococcaceae	Enterococcus	Enterococcus faecalis
553212.3	Staphylococcus capitis SK14	Bacteria	Firmicutes	Bacilli	Bacillales	Staphylococcaceae	Staphylococcus	Staphylococcus capitis
553217.3	Enhydrobacter aerosaccus SK60	Bacteria	Proteobacteria	Alphaproteobacteria	Rhodospirillales	-	Enhydrobacter	Enhydrobacter aerosaccus
553218.4	Campylobacter rectus RM3267	Bacteria	Proteobacteria	Epsilonproteobacteria	Campylobacterales	Campylobacteraceae	Campylobacter	Campylobacter rectus
553219.3	Campylobacter showae RM3277	Bacteria	Proteobacteria	Epsilonproteobacteria	Campylobacterales	Campylobacteraceae	Campylobacter	Campylobacter showae
553220.3	Campylobacter gracilis RM3268	Bacteria	Proteobacteria	Epsilonproteobacteria	Campylobacterales	Campylobacteraceae	Campylobacter	Campylobacter gracilis
553482.3	Streptococcus equi subsp. equi 4047	Bacteria	Firmicutes	Bacilli	Lactobacillales	Streptococcaceae	Streptococcus	Streptococcus equi
553973.6	Clostridium hylemonae DSM 15053	Bacteria	Firmicutes	Clostridia	Clostridiales	Lachnospiraceae	Lachnoclostridium	[Clostridium] hylemonae
554290.9	Salmonella enterica subsp. enterica serovar Paratyphi A str.	Bacteria	Proteobacteria	Gammaproteobacteria	Enterobacterales	Enterobacteriaceae	Salmonella	Salmonella enterica
555970.3	Bifidobacterium animalis subsp. lactis DSM 10140	Bacteria	Actinobacteria	Actinobacteria	Bifidobacteriales	Bifidobacteriaceae	Bifidobacterium	Bifidobacterium animalis
556258.5	Bacteroides sp. D1	Bacteria	Bacteroidetes	Bacteroidia	Bacteroidales	Bacteroidaceae	Bacteroides	-
556259.3	Bacteroides sp. D2	Bacteria	Bacteroidetes	Bacteroidia	Bacteroidales	Bacteroidaceae	Bacteroides	-
556260.3	Bacteroides sp. D4	Bacteria	Bacteroidetes	Bacteroidia	Bacteroidales	Bacteroidaceae	Bacteroides	Bacteroides dorei
556261.3	Clostridium sp. D5	Bacteria	Firmicutes	Clostridia	Clostridiales	Clostridiaceae	Clostridium	-
556262.3	Coprobacillus sp. D6	Bacteria	Firmicutes	Erysipelotrichia	Erysipelotrichales	Erysipelotrichaceae	Coprobacillus	-
556263.3	Fusobacterium sp. D12	Bacteria	Fusobacteria	Fusobacteriia	Fusobacteriales	Fusobacteriaceae	Fusobacterium	Fusobacterium necrophorum
556264.3	Fusobacterium sp. D11	Bacteria	Fusobacteria	Fusobacteriia	Fusobacteriales	Fusobacteriaceae	Fusobacterium	Fusobacterium nucleatum
556266.3	Shigella sp. D9	Bacteria	Proteobacteria	Gammaproteobacteria	Enterobacterales	Enterobacteriaceae	Escherichia	Escherichia coli
556267.4	Helicobacter winghamensis ATCC BAA-430	Bacteria	Proteobacteria	Epsilonproteobacteria	Campylobacterales	Helicobacteraceae	Helicobacter	Helicobacter winghamensis
556268.6	Oxalobacter formigenes HOxBLS	Bacteria	Proteobacteria	Betaproteobacteria	Burkholderiales	Oxalobacteraceae	Oxalobacter	Oxalobacter formigenes
556269.4	Oxalobacter formigenes OXCC13	Bacteria	Proteobacteria	Betaproteobacteria	Burkholderiales	Oxalobacteraceae	Oxalobacter	Oxalobacter formigenes
556270.3	Mollicutes bacterium D7	Bacteria	Firmicutes	Erysipelotrichia	Erysipelotrichales	Erysipelotrichaceae	Coprobacillus	-
557433.3	Lactobacillus reuteri JCM 1112	Bacteria	Firmicutes	Bacilli	Lactobacillales	Lactobacillaceae	Lactobacillus	Lactobacillus reuteri
557436.4	Lactobacillus reuteri DSM 20016	Bacteria	Firmicutes	Bacilli	Lactobacillales	Lactobacillaceae	Lactobacillus	Lactobacillus reuteri
557598.3	Laribacter hongkongensis HLHK9	Bacteria	Proteobacteria	Betaproteobacteria	Neisseriales	Chromobacteriaceae	Laribacter	Laribacter hongkongensis
557600.4	Acinetobacter baumannii AB307-0294	Bacteria	Proteobacteria	Gammaproteobacteria	Pseudomonadales	Moraxellaceae	Acinetobacter	Acinetobacter baumannii
557722.4	Pseudomonas aeruginosa LESB58	Bacteria	Proteobacteria	Gammaproteobacteria	Pseudomonadales	Pseudomonadaceae	Pseudomonas	Pseudomonas aeruginosa
559301.5	Lactobacillus gasseri MV-22	Bacteria	Firmicutes	Bacilli	Lactobacillales	Lactobacillaceae	Lactobacillus	Lactobacillus gasseri
561177.4	Anaerococcus hydrogenalis DSM 7454	Bacteria	Firmicutes	Tissierellia	Tissierellales	Peptoniphilaceae	Anaerococcus	Anaerococcus hydrogenalis
561180.4	Bifidobacterium gallicum DSM 20093	Bacteria	Actinobacteria	Actinobacteria	Bifidobacteriales	Bifidobacteriaceae	Bifidobacterium	Bifidobacterium gallicum
561276.4	Streptococcus pneumoniae ATCC 700669	Bacteria	Firmicutes	Bacilli	Lactobacillales	Streptococcaceae	Streptococcus	Streptococcus pneumoniae
562973.4	Actinomyces viscosus C505	Bacteria	Actinobacteria	Actinobacteria	Actinomycetales	Actinomycetaceae	Actinomyces	Actinomyces viscosus
562981.3	Gemella haemolysans M341	Bacteria	Firmicutes	Bacilli	Bacillales	Bacillales Family XI. Incertae Sedis	Gemella	Gemella haemolysans
562982.3	Gemella moribillum M424	Bacteria	Firmicutes	Bacilli	Bacillales	Bacillales Family XI. Incertae Sedis	Gemella	Gemella morbillorum
562983.3	Gemella sanguinis M325	Bacteria	Firmicutes	Bacilli	Bacillales	Bacillales Family XI. Incertae Sedis	Gemella	Gemella sanguinis
563031.3	Prevotella sp. C561	Bacteria	Bacteroidetes	Bacteroidia	Bacteroidales	Prevotellaceae	Prevotella	-
563032.4	Rothia dentocariosa M567	Bacteria	Actinobacteria	Actinobacteria	Micrococcales	Micrococcaceae	Rothia	Rothia dentocariosa
563033.4	Rothia mucilaginosa M508	Bacteria	Actinobacteria	Actinobacteria	Micrococcales	Micrococcaceae	Rothia	Rothia mucilaginosa
563041.6	Helicobacter pylori G27	Bacteria	Proteobacteria	Epsilonproteobacteria	Campylobacterales	Helicobacteraceae	Helicobacter	Helicobacter pylori
563174.3	Listeria monocytogenes L99	Bacteria	Firmicutes	Bacilli	Bacillales	Listeriaceae	Listeria	Listeria monocytogenes
563191.3	Acidaminococcus sp. D21	Bacteria	Firmicutes	Negativicutes	Acidaminococcales	Acidaminococcaceae	Acidaminococcus	-
563192.3	Bilophila wadsworthia 3_1_6	Bacteria	Proteobacteria	Deltaproteobacteria	Desulfovibrionales	Desulfovibrionaceae	Bilophila	Bilophila wadsworthia
563193.3	Parabacteroides sp. D13	Bacteria	Bacteroidetes	Bacteroidia	Bacteroidales	Tannerellaceae	Parabacteroides	-
563194.3	Pediococcus acidilactici 7_4	Bacteria	Firmicutes	Bacilli	Lactobacillales	Lactobacillaceae	Pediococcus	Pediococcus acidilactici
565040.3	Bifidobacterium longum subsp. longum 157F	Bacteria	Actinobacteria	Actinobacteria	Bifidobacteriales	Bifidobacteriaceae	Bifidobacterium	Bifidobacterium longum
565042.3	Bifidobacterium longum subsp. longum JCM 1217	Bacteria	Actinobacteria	Actinobacteria	Bifidobacteriales	Bifidobacteriaceae	Bifidobacterium	Bifidobacterium longum
565575.4	Ureaplasma urealyticum serovar 10 str. ATCC 33699	Bacteria	Tenericutes	Mollicutes	Mycoplasmatales	Mycoplasmataceae	Ureaplasma	Ureaplasma urealyticum
565638.4	Enterococcus faecalis T3	Bacteria	Firmicutes	Bacilli	Lactobacillales	Enterococcaceae	Enterococcus	Enterococcus faecalis
565641.4	Enterococcus faecalis X98	Bacteria	Firmicutes	Bacilli	Lactobacillales	Enterococcaceae	Enterococcus	Enterococcus faecalis
565652.4	Enterococcus casseliflavus EC30	Bacteria	Firmicutes	Bacilli	Lactobacillales	Enterococcaceae	Enterococcus	Enterococcus casseliflavus
565653.4	Enterococcus gallinarum EG2	Bacteria	Firmicutes	Bacilli	Lactobacillales	Enterococcaceae	Enterococcus	Enterococcus gallinarum
565654.4	Enterococcus casseliflavus EC10	Bacteria	Firmicutes	Bacilli	Lactobacillales	Enterococcaceae	Enterococcus	Enterococcus casseliflavus
565655.4	Enterococcus casseliflavus EC20	Bacteria	Firmicutes	Bacilli	Lactobacillales	Enterococcaceae	Enterococcus	Enterococcus casseliflavus
565662.4	Enterococcus faecium Com12	Bacteria	Firmicutes	Bacilli	Lactobacillales	Enterococcaceae	Enterococcus	Enterococcus faecium
565663.4	Enterococcus faecium Com15	Bacteria	Firmicutes	Bacilli	Lactobacillales	Enterococcaceae	Enterococcus	Enterococcus faecium
566546.4	Escherichia coli W	Bacteria	Proteobacteria	Gammaproteobacteria	Enterobacterales	Enterobacteriaceae	Escherichia	Escherichia coli
566550.8	Clostridium hathewayi DSM 13479	Bacteria	Firmicutes	Clostridia	Clostridiales	Clostridiaceae	Hungatella	Hungatella hathewayi
566551.4	Cedecea davisae DSM 4568	Bacteria	Proteobacteria	Gammaproteobacteria	Enterobacterales	Enterobacteriaceae	Cedecea	Cedecea davisae
566552.23	Bifidobacterium catenulatum JG_Bg468_v2	Bacteria	Actinobacteria	Actinobacteria	Bifidobacteriales	Bifidobacteriaceae	Bifidobacterium	Bifidobacterium catenulatum
566552.4	Bifidobacterium catenulatum DSM 16992	Bacteria	Actinobacteria	Actinobacteria	Bifidobacteriales	Bifidobacteriaceae	Bifidobacterium	Bifidobacterium catenulatum
568703.9	Lactobacillus rhamnosus GG	Bacteria	Firmicutes	Bacilli	Lactobacillales	Lactobacillaceae	Lactobacillus	Lactobacillus rhamnosus
568704.3	Lactobacillus rhamnosus Lc 705	Bacteria	Firmicutes	Bacilli	Lactobacillales	Lactobacillaceae	Lactobacillus	Lactobacillus rhamnosus
568816.4	Acidaminococcus intestini RyC-MR95	Bacteria	Firmicutes	Negativicutes	Acidaminococcales	Acidaminococcaceae	Acidaminococcus	Acidaminococcus intestini
570508.6	Helicobacter pylori P12	Bacteria	Proteobacteria	Epsilonproteobacteria	Campylobacterales	Helicobacteraceae	Helicobacter	Helicobacter pylori
572010.5	Slackia isoflavoniconvertens strain DSM 22006	Bacteria	Actinobacteria	Coriobacteriia	Eggerthellales	Eggerthellaceae	Slackia	Slackia isoflavoniconvertens
572545.4	Ruminiclostridium thermocellum DSM 2360 strain LQRI	Bacteria	Firmicutes	Clostridia	Clostridiales	Hungateiclostridiaceae	Hungateiclostridium	Hungateiclostridium thermocellum
573058.3	Peptoniphilus asaccharolyticus DSM 20463 strain DSM 20463	Bacteria	Firmicutes	Tissierellia	Tissierellales	Peptoniphilaceae	Peptoniphilus	Peptoniphilus asaccharolyticus
573061.5	Clostridium cellulovorans 743B	Bacteria	Firmicutes	Clostridia	Clostridiales	Clostridiaceae	Clostridium	Clostridium cellulovorans
573235.3	Escherichia coli O26:H11 str. 11368	Bacteria	Proteobacteria	Gammaproteobacteria	Enterobacterales	Enterobacteriaceae	Escherichia	Escherichia coli
574093.3	Streptococcus pneumoniae AP200	Bacteria	Firmicutes	Bacilli	Lactobacillales	Streptococcaceae	Streptococcus	Streptococcus pneumoniae
574521.7	Escherichia coli O127:H6 str. E2348/69	Bacteria	Proteobacteria	Gammaproteobacteria	Enterobacterales	Enterobacteriaceae	Escherichia	Escherichia coli
575564.3	Acinetobacter sp. RUH2624	Bacteria	Proteobacteria	Gammaproteobacteria	Pseudomonadales	Moraxellaceae	Acinetobacter	Acinetobacter nosocomialis
575565.3	Acinetobacter sp. SH024	Bacteria	Proteobacteria	Gammaproteobacteria	Pseudomonadales	Moraxellaceae	Acinetobacter	Acinetobacter pittii
575584.3	Acinetobacter baumannii ATCC 19606	Bacteria	Proteobacteria	Gammaproteobacteria	Pseudomonadales	Moraxellaceae	Acinetobacter	Acinetobacter baumannii
575585.3	Acinetobacter calcoaceticus RUH2202	Bacteria	Proteobacteria	Gammaproteobacteria	Pseudomonadales	Moraxellaceae	Acinetobacter	Acinetobacter calcoaceticus
575586.4	Acinetobacter johnsonii SH046	Bacteria	Proteobacteria	Gammaproteobacteria	Pseudomonadales	Moraxellaceae	Acinetobacter	Acinetobacter johnsonii
575587.3	Acinetobacter junii SH205	Bacteria	Proteobacteria	Gammaproteobacteria	Pseudomonadales	Moraxellaceae	Acinetobacter	Acinetobacter junii
575588.3	Acinetobacter lwoffii SH145	Bacteria	Proteobacteria	Gammaproteobacteria	Pseudomonadales	Moraxellaceae	Acinetobacter	Acinetobacter lwoffii
575589.3	Acinetobacter radioresistens SH164	Bacteria	Proteobacteria	Gammaproteobacteria	Pseudomonadales	Moraxellaceae	Acinetobacter	Acinetobacter radioresistens
575590.3	Bacteroidetes oral taxon 274 str. F0058	Bacteria	Bacteroidetes	-	-	-	-	-
575593.3	Lachnospiraceae oral taxon 107 str. F0167	Bacteria	Firmicutes	Clostridia	Clostridiales	Lachnospiraceae	-	-
575594.3	Lactobacillus coleohominis 101-4-CHN	Bacteria	Firmicutes	Bacilli	Lactobacillales	Lactobacillaceae	Lactobacillus	Lactobacillus coleohominis
575595.3	Lactobacillus crispatus 125-2-CHN	Bacteria	Firmicutes	Bacilli	Lactobacillales	Lactobacillaceae	Lactobacillus	Lactobacillus crispatus
575596.3	Lactobacillus crispatus MV-1A-US	Bacteria	Firmicutes	Bacilli	Lactobacillales	Lactobacillaceae	Lactobacillus	Lactobacillus crispatus
575597.3	Lactobacillus crispatus MV-3A-US	Bacteria	Firmicutes	Bacilli	Lactobacillales	Lactobacillaceae	Lactobacillus	Lactobacillus crispatus
575599.3	Lactobacillus fermentum 28-3-CHN	Bacteria	Firmicutes	Bacilli	Lactobacillales	Lactobacillaceae	Lactobacillus	Lactobacillus fermentum
575603.3	Lactobacillus gasseri SJ-9E-US	Bacteria	Firmicutes	Bacilli	Lactobacillales	Lactobacillaceae	Lactobacillus	Lactobacillus gasseri
575604.3	Lactobacillus gasseri SV-16A-US	Bacteria	Firmicutes	Bacilli	Lactobacillales	Lactobacillaceae	Lactobacillus	Lactobacillus gasseri
575605.3	Lactobacillus jensenii 115-3-CHN	Bacteria	Firmicutes	Bacilli	Lactobacillales	Lactobacillaceae	Lactobacillus	Lactobacillus jensenii
575606.3	Lactobacillus jensenii 27-2-CHN	Bacteria	Firmicutes	Bacilli	Lactobacillales	Lactobacillaceae	Lactobacillus	Lactobacillus jensenii
575607.3	Lactobacillus jensenii SJ-7A-US	Bacteria	Firmicutes	Bacilli	Lactobacillales	Lactobacillaceae	Lactobacillus	Lactobacillus jensenii
575611.3	Prevotella buccae D17	Bacteria	Bacteroidetes	Bacteroidia	Bacteroidales	Prevotellaceae	Prevotella	Prevotella buccae
575612.3	Prevotella melaninogenica D18	Bacteria	Bacteroidetes	Bacteroidia	Bacteroidales	Prevotellaceae	Prevotella	Prevotella melaninogenica
580050.3	Bifidobacterium animalis subsp. lactis Bl-04	Bacteria	Actinobacteria	Actinobacteria	Bifidobacteriales	Bifidobacteriaceae	Bifidobacterium	Bifidobacterium animalis
585034.5	Escherichia coli IAI1	Bacteria	Proteobacteria	Gammaproteobacteria	Enterobacterales	Enterobacteriaceae	Escherichia	Escherichia coli
585035.6	Escherichia coli S88	Bacteria	Proteobacteria	Gammaproteobacteria	Enterobacterales	Enterobacteriaceae	Escherichia	Escherichia coli
585054.5	Escherichia fergusonii ATCC 35469	Bacteria	Proteobacteria	Gammaproteobacteria	Enterobacterales	Enterobacteriaceae	Escherichia	Escherichia fergusonii
585055.8	Escherichia coli 55989	Bacteria	Proteobacteria	Gammaproteobacteria	Enterobacterales	Enterobacteriaceae	Escherichia	Escherichia coli
585056.7	Escherichia coli UMN026	Bacteria	Proteobacteria	Gammaproteobacteria	Enterobacterales	Enterobacteriaceae	Escherichia	Escherichia coli
585057.6	Escherichia coli IAI39	Bacteria	Proteobacteria	Gammaproteobacteria	Enterobacterales	Enterobacteriaceae	Escherichia	Escherichia coli
585199.3	Mobiluncus mulieris ATCC 35243	Bacteria	Actinobacteria	Actinobacteria	Actinomycetales	Actinomycetaceae	Mobiluncus	Mobiluncus mulieris
585394.18	Roseburia hominis A2-183	Bacteria	Firmicutes	Clostridia	Clostridiales	Lachnospiraceae	Roseburia	Roseburia hominis
585395.4	Escherichia coli O103:H2 str. 12009	Bacteria	Proteobacteria	Gammaproteobacteria	Enterobacterales	Enterobacteriaceae	Escherichia	Escherichia coli
585397.9	Escherichia coli ED1a	Bacteria	Proteobacteria	Gammaproteobacteria	Enterobacterales	Enterobacteriaceae	Escherichia	Escherichia coli
585501.3	Oribacterium sinus F0268	Bacteria	Firmicutes	Clostridia	Clostridiales	Lachnospiraceae	Oribacterium	Oribacterium sinus
585506.3	Weissella paramesenteroides ATCC 33313	Bacteria	Firmicutes	Bacilli	Lactobacillales	Leuconostocaceae	Weissella	Weissella paramesenteroides
585517.3	Lactobacillus reuteri MM2-3	Bacteria	Firmicutes	Bacilli	Lactobacillales	Lactobacillaceae	Lactobacillus	Lactobacillus reuteri
585520.4	Lactobacillus helveticus DSM 20075	Bacteria	Firmicutes	Bacilli	Lactobacillales	Lactobacillaceae	Lactobacillus	Lactobacillus helveticus
585524.3	Lactobacillus amylolyticus DSM 11664	Bacteria	Firmicutes	Bacilli	Lactobacillales	Lactobacillaceae	Lactobacillus	Lactobacillus amylolyticus
585535.5	Helicobacter pylori 35A	Bacteria	Proteobacteria	Epsilonproteobacteria	Campylobacterales	Helicobacteraceae	Helicobacter	Helicobacter pylori
585538.3	Helicobacter pylori 83	Bacteria	Proteobacteria	Epsilonproteobacteria	Campylobacterales	Helicobacteraceae	Helicobacter	Helicobacter pylori
585543.3	Bacteroides sp. D20	Bacteria	Bacteroidetes	Bacteroidia	Bacteroidales	Bacteroidaceae	Bacteroides	-
585544.3	Bacteroides sp. D22	Bacteria	Bacteroidetes	Bacteroidia	Bacteroidales	Bacteroidaceae	Bacteroides	-
585891.3	Staphylococcus aureus subsp. aureus Mu50-omega	Bacteria	Firmicutes	Bacilli	Bacillales	Staphylococcaceae	Staphylococcus	Staphylococcus aureus
586220.3	Leuconostoc mesenteroides subsp. cremoris ATCC 19254	Bacteria	Firmicutes	Bacilli	Lactobacillales	Leuconostocaceae	Leuconostoc	Leuconostoc mesenteroides
591001.3	Acidaminococcus fermentans DSM 20731	Bacteria	Firmicutes	Negativicutes	Acidaminococcales	Acidaminococcaceae	Acidaminococcus	Acidaminococcus fermentans
591365.3	Streptococcus intermedius JTH08	Bacteria	Firmicutes	Bacilli	Lactobacillales	Streptococcaceae	Streptococcus	Streptococcus intermedius
591946.4	Escherichia coli LF82	Bacteria	Proteobacteria	Gammaproteobacteria	Enterobacterales	Enterobacteriaceae	Escherichia	Escherichia coli
592010.4	Abiotrophia defectiva ATCC 49176	Bacteria	Firmicutes	Bacilli	Lactobacillales	Aerococcaceae	Abiotrophia	Abiotrophia defectiva
592014.3	Acinetobacter sp. 6013113	Bacteria	Proteobacteria	Gammaproteobacteria	Pseudomonadales	Moraxellaceae	Acinetobacter	Acinetobacter baumannii
592015.5	Anaerobaculum hydrogeniformans ATCC BAA-1850	Bacteria	Synergistetes	Synergistia	Synergistales	Synergistaceae	Acetomicrobium	Acetomicrobium hydrogeniformans
592022.4	Bacillus megaterium DSM319	Bacteria	Firmicutes	Bacilli	Bacillales	Bacillaceae	Bacillus	Bacillus megaterium
592028.3	Dialister invisus DSM 15470	Bacteria	Firmicutes	Negativicutes	Veillonellales	Veillonellaceae	Dialister	Dialister invisus
592031.3	Eubacterium saphenum ATCC 49989	Bacteria	Firmicutes	Clostridia	Clostridiales	Clostridiales Family XIII. Incertae Sedis	-	[Eubacterium] saphenum
595495.5	Escherichia coli KO11	Bacteria	Proteobacteria	Gammaproteobacteria	Enterobacterales	Enterobacteriaceae	Escherichia	Escherichia coli
595496.3	Escherichia coli BW2952	Bacteria	Proteobacteria	Gammaproteobacteria	Enterobacterales	Enterobacteriaceae	Escherichia	Escherichia coli
596309.3	Rhodococcus erythropolis SK121	Bacteria	Actinobacteria	Actinobacteria	Corynebacteriales	Nocardiaceae	Rhodococcus	Rhodococcus erythropolis
596312.3	Micrococcus luteus SK58	Bacteria	Actinobacteria	Actinobacteria	Micrococcales	Micrococcaceae	Micrococcus	Micrococcus luteus
596315.3	Peptostreptococcus stomatis DSM 17678	Bacteria	Firmicutes	Clostridia	Clostridiales	Peptostreptococcaceae	Peptostreptococcus	Peptostreptococcus stomatis
596317.3	Staphylococcus epidermidis SK135	Bacteria	Firmicutes	Bacilli	Bacillales	Staphylococcaceae	Staphylococcus	Staphylococcus epidermidis
596318.3	Acinetobacter radioresistens SK82	Bacteria	Proteobacteria	Gammaproteobacteria	Pseudomonadales	Moraxellaceae	Acinetobacter	Acinetobacter radioresistens
596319.3	Staphylococcus warneri L37603	Bacteria	Firmicutes	Bacilli	Bacillales	Staphylococcaceae	Staphylococcus	Staphylococcus warneri
596320.3	Neisseria flavescens SK114	Bacteria	Proteobacteria	Betaproteobacteria	Neisseriales	Neisseriaceae	Neisseria	Neisseria flavescens
596322.3	Streptococcus salivarius SK126	Bacteria	Firmicutes	Bacilli	Lactobacillales	Streptococcaceae	Streptococcus	Streptococcus salivarius
596323.3	Leptotrichia goodfellowii F0264	Bacteria	Fusobacteria	Fusobacteriia	Fusobacteriales	Leptotrichiaceae	Leptotrichia	Leptotrichia goodfellowii
596325.3	Lactobacillus jensenii 269-3	Bacteria	Firmicutes	Bacilli	Lactobacillales	Lactobacillaceae	Lactobacillus	Lactobacillus jensenii
596326.3	Lactobacillus jensenii 208-1	Bacteria	Firmicutes	Bacilli	Lactobacillales	Lactobacillaceae	Lactobacillus	Lactobacillus jensenii
596327.3	Porphyromonas uenonis 60-3	Bacteria	Bacteroidetes	Bacteroidia	Bacteroidales	Porphyromonadaceae	Porphyromonas	Porphyromonas uenonis
596328.3	Mobiluncus mulieris 28-1	Bacteria	Actinobacteria	Actinobacteria	Actinomycetales	Actinomycetaceae	Mobiluncus	Mobiluncus mulieris
596329.3	Peptostreptococcus anaerobius 653-L	Bacteria	Firmicutes	Clostridia	Clostridiales	Peptostreptococcaceae	Peptostreptococcus	Peptostreptococcus anaerobius
596330.3	Peptoniphilus lacrimalis 315-B	Bacteria	Firmicutes	Tissierellia	Tissierellales	Peptoniphilaceae	Peptoniphilus	Peptoniphilus lacrimalis
613026.4	Helicobacter bilis ATCC 43879	Bacteria	Proteobacteria	Epsilonproteobacteria	Campylobacterales	Helicobacteraceae	Helicobacter	Helicobacter bilis
622312.4	Roseburia inulinivorans DSM 16841	Bacteria	Firmicutes	Clostridia	Clostridiales	Lachnospiraceae	Roseburia	Roseburia inulinivorans
626095.4	Ureaplasma urealyticum serovar 8 str. ATCC 27618	Bacteria	Tenericutes	Mollicutes	Mycoplasmatales	Mycoplasmataceae	Ureaplasma	Ureaplasma urealyticum
626096.4	Ureaplasma urealyticum serovar 2 str. ATCC 27814	Bacteria	Tenericutes	Mollicutes	Mycoplasmatales	Mycoplasmataceae	Ureaplasma	Ureaplasma urealyticum
626369.3	Granulicatella elegans ATCC 700633	Bacteria	Firmicutes	Bacilli	Lactobacillales	Carnobacteriaceae	Granulicatella	Granulicatella elegans
626522.3	Prevotella tannerae ATCC 51259	Bacteria	Bacteroidetes	Bacteroidia	Bacteroidales	Prevotellaceae	Alloprevotella	Alloprevotella tannerae
626937.8	Christensenella minuta strain DSM 22607	Bacteria	Firmicutes	Clostridia	Clostridiales	Christensenellaceae	Christensenella	Christensenella minuta
626939.3	Phascolarctobacterium sp. YIT 12067	Bacteria	Firmicutes	Negativicutes	Acidaminococcales	Acidaminococcaceae	Phascolarctobacterium	Phascolarctobacterium succinatutens
629741.3	Kingella oralis ATCC 51147	Bacteria	Proteobacteria	Betaproteobacteria	Neisseriales	Neisseriaceae	Kingella	Kingella oralis
629742.3	Staphylococcus hominis SK119	Bacteria	Firmicutes	Bacilli	Bacillales	Staphylococcaceae	Staphylococcus	Staphylococcus hominis
630527.3	Lactobacillus gasseri 202-4	Bacteria	Firmicutes	Bacilli	Lactobacillales	Lactobacillaceae	Lactobacillus	Lactobacillus gasseri
632245.3	Clostridium butyricum E4 str. BoNT E BL5262	Bacteria	Firmicutes	Clostridia	Clostridiales	Clostridiaceae	Clostridium	Clostridium butyricum
633147.4	Olsenella uli DSM 7084	Bacteria	Actinobacteria	Coriobacteriia	Coriobacteriales	Atopobiaceae	Olsenella	Olsenella uli
633149.4	Brevundimonas subvibrioides ATCC 15264	Bacteria	Proteobacteria	Alphaproteobacteria	Caulobacterales	Caulobacteraceae	Brevundimonas	Brevundimonas subvibrioides
633699.4	Lactobacillus johnsonii FI9785	Bacteria	Firmicutes	Bacilli	Lactobacillales	Lactobacillaceae	Lactobacillus	Lactobacillus johnsonii
634176.4	Aggregatibacter aphrophilus NJ8700	Bacteria	Proteobacteria	Gammaproteobacteria	Pasteurellales	Pasteurellaceae	Aggregatibacter	Aggregatibacter aphrophilus
634178.4	Listeria monocytogenes Clip80459	Bacteria	Firmicutes	Bacilli	Bacillales	Listeriaceae	Listeria	Listeria monocytogenes
637381.3	Listeria monocytogenes 08-5923	Bacteria	Firmicutes	Bacilli	Bacillales	Listeriaceae	Listeria	Listeria monocytogenes
637909.5	Streptococcus gallolyticus UCN34	Bacteria	Firmicutes	Bacilli	Lactobacillales	Streptococcaceae	Streptococcus	Streptococcus gallolyticus
637910.3	Citrobacter rodentium ICC168	Bacteria	Proteobacteria	Gammaproteobacteria	Enterobacterales	Enterobacteriaceae	Citrobacter	Citrobacter rodentium
638301.3	Granulicatella adiacens ATCC 49175	Bacteria	Firmicutes	Bacilli	Lactobacillales	Carnobacteriaceae	Granulicatella	Granulicatella adiacens
640513.3	Enterobacter asburiae LF7a	Bacteria	Proteobacteria	Gammaproteobacteria	Enterobacterales	Enterobacteriaceae	Enterobacter	Enterobacter cloacae complex
641107.3	Clostridium sp. DL-VIII	Bacteria	Firmicutes	Clostridia	Clostridiales	Clostridiaceae	Clostridium	-
641112.4	Ruminococcus flavefaciens FD-1	Bacteria	Firmicutes	Clostridia	Clostridiales	Ruminococcaceae	Ruminococcus	Ruminococcus flavefaciens
641118.3	Ochrobactrum intermedium LMG 3301	Bacteria	Proteobacteria	Alphaproteobacteria	Rhizobiales	Brucellaceae	Ochrobactrum	Ochrobactrum intermedium
641143.3	Capnocytophaga granulosa ATCC 51502	Bacteria	Bacteroidetes	Flavobacteriia	Flavobacteriales	Flavobacteriaceae	Capnocytophaga	Capnocytophaga granulosa
641146.3	Scardovia inopinata F0304	Bacteria	Actinobacteria	Actinobacteria	Bifidobacteriales	Bifidobacteriaceae	Scardovia	Scardovia inopinata
642492.3	Clostridium lentocellum DSM 5427	Bacteria	Firmicutes	Clostridia	Clostridiales	Lachnospiraceae	Cellulosilyticum	Cellulosilyticum lentocellum
642589.3	Caproiciproducens galactitolivorans strain BS-1	Bacteria	Firmicutes	Clostridia	Clostridiales	Ruminococcaceae	Caproiciproducens	Caproiciproducens galactitolivorans
644042.3	Lactobacillus plantarum JDM1	Bacteria	Firmicutes	Bacilli	Lactobacillales	Lactobacillaceae	Lactobacillus	Lactobacillus plantarum
644283.4	Micromonospora aurantiaca ATCC 27029	Bacteria	Actinobacteria	Actinobacteria	Micromonosporales	Micromonosporaceae	Micromonospora	Micromonospora aurantiaca
644284.3	Arcanobacterium haemolyticum DSM 20595	Bacteria	Actinobacteria	Actinobacteria	Actinomycetales	Actinomycetaceae	Arcanobacterium	Arcanobacterium haemolyticum
644801.3	Pseudomonas stutzeri RCH2	Bacteria	Proteobacteria	Gammaproteobacteria	Pseudomonadales	Pseudomonadaceae	Pseudomonas	Pseudomonas stutzeri
645127.4	Corynebacterium kroppenstedtii DSM 44385	Bacteria	Actinobacteria	Actinobacteria	Corynebacteriales	Corynebacteriaceae	Corynebacterium	Corynebacterium kroppenstedtii
645462.3	Clostridium difficile CD196	Bacteria	Firmicutes	Clostridia	Clostridiales	Peptostreptococcaceae	Clostridioides	Clostridioides difficile
645463.3	Clostridium difficile R20291	Bacteria	Firmicutes	Clostridia	Clostridiales	Peptostreptococcaceae	Clostridioides	Clostridioides difficile
645464.3	Campylobacter jejuni subsp. jejuni M1	Bacteria	Proteobacteria	Epsilonproteobacteria	Campylobacterales	Campylobacteraceae	Campylobacter	Campylobacter jejuni
649742.3	Actinomyces odontolyticus F0309	Bacteria	Actinobacteria	Actinobacteria	Actinomycetales	Actinomycetaceae	Actinomyces	Actinomyces odontolyticus
649747.3	Aneurinibacillus aneurinilyticus ATCC 12856	Bacteria	Firmicutes	Bacilli	Bacillales	Paenibacillaceae	Aneurinibacillus	Aneurinibacillus aneurinilyticus
649754.3	Corynebacterium ammoniagenes DSM 20306	Bacteria	Actinobacteria	Actinobacteria	Corynebacteriales	Corynebacteriaceae	Corynebacterium	Corynebacterium ammoniagenes
649756.66	Anaerostipes hadrus LFYP4	Bacteria	Firmicutes	Clostridia	Clostridiales	Lachnospiraceae	Anaerostipes	Anaerostipes hadrus
649757.3	Anaerostipes hadrus DSM 3319	Bacteria	Firmicutes	Clostridia	Clostridiales	Lachnospiraceae	Anaerostipes	Anaerostipes hadrus
649761.3	Prevotella veroralis F0319	Bacteria	Bacteroidetes	Bacteroidia	Bacteroidales	Prevotellaceae	Prevotella	Prevotella veroralis
649764.3	Slackia exigua ATCC 700122	Bacteria	Actinobacteria	Coriobacteriia	Eggerthellales	Eggerthellaceae	Slackia	Slackia exigua
655811.4	Anaerococcus vaginalis ATCC 51170	Bacteria	Firmicutes	Tissierellia	Tissierellales	Peptoniphilaceae	Anaerococcus	Anaerococcus vaginalis
655812.3	Aerococcus viridans ATCC 11563	Bacteria	Firmicutes	Bacilli	Lactobacillales	Aerococcaceae	Aerococcus	Aerococcus viridans
655813.3	Streptococcus oralis ATCC 35037	Bacteria	Firmicutes	Bacilli	Lactobacillales	Streptococcaceae	Streptococcus	Streptococcus oralis
655817.3	Escherichia coli ABU 83972	Bacteria	Proteobacteria	Gammaproteobacteria	Enterobacterales	Enterobacteriaceae	Escherichia	Escherichia coli
657308.3	Gordonibacter pamelaeae 7-10-1-b	Bacteria	Actinobacteria	Coriobacteriia	Eggerthellales	Eggerthellaceae	Gordonibacter	Gordonibacter pamelaeae
657309.4	Bacteroides xylanisolvens XB1A	Bacteria	Bacteroidetes	Bacteroidia	Bacteroidales	Bacteroidaceae	Bacteroides	Bacteroides xylanisolvens
657310.3	Enterococcus sp. 7L76	Bacteria	Firmicutes	Bacilli	Lactobacillales	Enterococcaceae	Enterococcus	-
657313.3	Ruminococcus torques L2-14	Bacteria	Firmicutes	Clostridia	Clostridiales	Lachnospiraceae	Blautia	[Ruminococcus] torques
657314.3	Ruminococcus obeum A2-162	Bacteria	Firmicutes	Clostridia	Clostridiales	Lachnospiraceae	Blautia	Blautia obeum
657315.3	Roseburia intestinalis M50/1	Bacteria	Firmicutes	Clostridia	Clostridiales	Lachnospiraceae	Roseburia	Roseburia intestinalis
657316.3	Megamonas hypermegale ART12/1	Bacteria	Firmicutes	Negativicutes	Selenomonadales	Selenomonadaceae	Megamonas	Megamonas hypermegale
657317.3	Eubacterium rectale M104/1	Bacteria	Firmicutes	Clostridia	Clostridiales	Lachnospiraceae	-	[Eubacterium] rectale
657318.4	Eubacterium rectale DSM 17629	Bacteria	Firmicutes	Clostridia	Clostridiales	Lachnospiraceae	-	[Eubacterium] rectale
657319.3	Eubacterium siraeum 70/3	Bacteria	Firmicutes	Clostridia	Clostridiales	Ruminococcaceae	Ruminiclostridium	[Eubacterium] siraeum
657321.5	Ruminococcus bromii L2-63	Bacteria	Firmicutes	Clostridia	Clostridiales	Ruminococcaceae	Ruminococcus	Ruminococcus bromii
657322.3	Faecalibacterium prausnitzii SL3/3	Bacteria	Firmicutes	Clostridia	Clostridiales	Ruminococcaceae	Faecalibacterium	Faecalibacterium prausnitzii
657323.3	Ruminococcus sp. SR1/5	Bacteria	Firmicutes	Clostridia	Clostridiales	Ruminococcaceae	Ruminococcus	-
657324.3	Butyrivibrio fibrisolvens 16/4	Bacteria	Firmicutes	Clostridia	Clostridiales	Lachnospiraceae	Butyrivibrio	Butyrivibrio fibrisolvens
658080.3	Ralstonia sp. 5_2_56FAA	Bacteria	Proteobacteria	Betaproteobacteria	Burkholderiales	Burkholderiaceae	Ralstonia	-
658081.3	Lachnospiraceae bacterium 1_1_57FAA	Bacteria	Firmicutes	Clostridia	Clostridiales	Lachnospiraceae	-	-
658082.3	Lachnospiraceae bacterium 2_1_58FAA	Bacteria	Firmicutes	Clostridia	Clostridiales	Lachnospiraceae	-	-
658083.3	Lachnospiraceae bacterium 6_1_63FAA	Bacteria	Firmicutes	Clostridia	Clostridiales	Lachnospiraceae	-	-
658085.3	Lachnospiraceae bacterium 5_1_57FAA	Bacteria	Firmicutes	Clostridia	Clostridiales	Lachnospiraceae	-	-
658086.3	Lachnospiraceae bacterium 3_1_57FAA_CT1	Bacteria	Firmicutes	Clostridia	Clostridiales	Lachnospiraceae	-	-
658088.3	Lachnospiraceae bacterium 9_1_43BFAA	Bacteria	Firmicutes	Clostridia	Clostridiales	Lachnospiraceae	-	-
658089.3	Lachnospiraceae bacterium 5_1_63FAA	Bacteria	Firmicutes	Clostridia	Clostridiales	Lachnospiraceae	-	-
658655.3	Lachnospiraceae bacterium 1_4_56FAA	Bacteria	Firmicutes	Clostridia	Clostridiales	Lachnospiraceae	-	-
658657.3	Erysipelotrichaceae bacterium 21_3	Bacteria	Firmicutes	Erysipelotrichia	Erysipelotrichales	Erysipelotrichaceae	-	-
658659.3	Erysipelotrichaceae bacterium 3_1_53	Bacteria	Firmicutes	Erysipelotrichia	Erysipelotrichales	Erysipelotrichaceae	-	-
658661.3	Parabacteroides sp. D25	Bacteria	Bacteroidetes	Bacteroidia	Bacteroidales	Tannerellaceae	Parabacteroides	-
658662.3	Parabacteroides sp. D26	Bacteria	Bacteroidetes	Bacteroidia	Bacteroidales	Tannerellaceae	Parabacteroides	-
658664.3	Ralstonia sp. 5_7_47FAA	Bacteria	Proteobacteria	Betaproteobacteria	Burkholderiales	Burkholderiaceae	Ralstonia	-
663952.3	Streptococcus dysgalactiae subsp. dysgalactiae ATCC 27957	Bacteria	Firmicutes	Bacilli	Lactobacillales	Streptococcaceae	Streptococcus	Streptococcus dysgalactiae
663954.3	Streptococcus dysgalactiae subsp. equisimilis ATCC 12394	Bacteria	Firmicutes	Bacilli	Lactobacillales	Streptococcaceae	Streptococcus	Streptococcus dysgalactiae
665937.3	Anaerostipes sp. 3_2_56FAA	Bacteria	Firmicutes	Clostridia	Clostridiales	Lachnospiraceae	Anaerostipes	-
665938.3	Bacteroides sp. 2_1_56FAA	Bacteria	Bacteroidetes	Bacteroidia	Bacteroidales	Bacteroidaceae	Bacteroides	-
665939.3	Campylobacter sp. 10_1_50	Bacteria	Proteobacteria	Epsilonproteobacteria	Campylobacterales	Campylobacteraceae	Campylobacter	-
665940.3	Clostridium sp. 7_3_54FAA	Bacteria	Firmicutes	Clostridia	Clostridiales	Clostridiaceae	Clostridium	-
665941.3	Coprobacillus sp. 3_3_56FAA	Bacteria	Firmicutes	Erysipelotrichia	Erysipelotrichales	Erysipelotrichaceae	Coprobacillus	-
665942.3	Desulfovibrio sp. 6_1_46AFAA	Bacteria	Proteobacteria	Deltaproteobacteria	Desulfovibrionales	Desulfovibrionaceae	Desulfovibrio	-
665943.3	Eggerthella sp. 1_3_56FAA	Bacteria	Actinobacteria	Coriobacteriia	Eggerthellales	Eggerthellaceae	Eggerthella	-
665944.3	Klebsiella sp. 4_1_44FAA	Bacteria	Proteobacteria	Gammaproteobacteria	Enterobacterales	Enterobacteriaceae	Klebsiella	-
665945.3	Lactobacillus sp. 7_1_47FAA	Bacteria	Firmicutes	Bacilli	Lactobacillales	Lactobacillaceae	Lactobacillus	-
665948.3	Pseudomonas sp. 2_1_26	Bacteria	Proteobacteria	Gammaproteobacteria	Pseudomonadales	Pseudomonadaceae	Pseudomonas	-
665949.3	Tannerella sp. 6_1_58FAA_CT1	Bacteria	Bacteroidetes	Bacteroidia	Bacteroidales	Tannerellaceae	Tannerella	-
665950.3	Lachnospiraceae bacterium 3_1_46FAA	Bacteria	Firmicutes	Clostridia	Clostridiales	Lachnospiraceae	-	-
665951.3	Lachnospiraceae bacterium 8_1_57FAA	Bacteria	Firmicutes	Clostridia	Clostridiales	Lachnospiraceae	-	-
665952.3	Bacillus smithii 7_3_47FAA	Bacteria	Firmicutes	Bacilli	Bacillales	Bacillaceae	Bacillus	Bacillus smithii
665953.3	Bacteroides eggerthii 1_2_48FAA	Bacteria	Bacteroidetes	Bacteroidia	Bacteroidales	Bacteroidaceae	Bacteroides	Bacteroides eggerthii
665954.3	Bacteroides ovatus 3_8_47FAA	Bacteria	Bacteroidetes	Bacteroidia	Bacteroidales	Bacteroidaceae	Bacteroides	Bacteroides ovatus
665956.3	Subdoligranulum sp. 4_3_54A2FAA	Bacteria	Firmicutes	Clostridia	Clostridiales	Ruminococcaceae	Subdoligranulum	-
665957.3	Bacillus sp. 7_6_55CFAA_CT2	Bacteria	Firmicutes	Bacilli	Bacillales	Bacillaceae	Bacillus	-
667015.3	Bacteroides salanitronis DSM 18170	Bacteria	Bacteroidetes	Bacteroidia	Bacteroidales	Bacteroidaceae	Bacteroides	Bacteroides salanitronis
667127.3	Klebsiella pneumoniae subsp. rhinoscleromatis ATCC 13884	Bacteria	Proteobacteria	Gammaproteobacteria	Enterobacterales	Enterobacteriaceae	Klebsiella	Klebsiella pneumoniae
667129.3	Serratia odorifera DSM 4582	Bacteria	Proteobacteria	Gammaproteobacteria	Enterobacterales	Yersiniaceae	Serratia	Serratia odorifera
675806.3	Vibrio mimicus MB-451	Bacteria	Proteobacteria	Gammaproteobacteria	Vibrionales	Vibrionaceae	Vibrio	Vibrio mimicus
675811.4	Vibrio furnissii CIP 102972	Bacteria	Proteobacteria	Gammaproteobacteria	Vibrionales	Vibrionaceae	Vibrio	Vibrio furnissii
675812.3	Grimontia hollisae CIP 101886	Bacteria	Proteobacteria	Gammaproteobacteria	Vibrionales	Vibrionaceae	Grimontia	Grimontia hollisae
675820.3	Vibrio mimicus VM223	Bacteria	Proteobacteria	Gammaproteobacteria	Vibrionales	Vibrionaceae	Vibrio	Vibrio mimicus
679188.3	Lactobacillus crispatus 214-1	Bacteria	Firmicutes	Bacilli	Lactobacillales	Lactobacillaceae	Lactobacillus	Lactobacillus crispatus
679189.3	Prevotella timonensis CRIS 5C-B1	Bacteria	Bacteroidetes	Bacteroidia	Bacteroidales	Prevotellaceae	Prevotella	Prevotella timonensis
679192.3	Bulleidia extructa W1219	Bacteria	Firmicutes	Erysipelotrichia	Erysipelotrichales	Erysipelotrichaceae	Bulleidia	Bulleidia extructa
679193.4	Propionibacterium acnes SK182	Bacteria	Actinobacteria	Actinobacteria	Propionibacteriales	Propionibacteriaceae	Cutibacterium	Cutibacterium acnes
679194.3	Propionibacterium acnes J139	Bacteria	Actinobacteria	Actinobacteria	Propionibacteriales	Propionibacteriaceae	Cutibacterium	Cutibacterium acnes
679195.3	Propionibacterium acnes J165	Bacteria	Actinobacteria	Actinobacteria	Propionibacteriales	Propionibacteriaceae	Cutibacterium	Cutibacterium acnes
679196.3	Lactobacillus gasseri 224-1	Bacteria	Firmicutes	Bacilli	Lactobacillales	Lactobacillaceae	Lactobacillus	Lactobacillus gasseri
679198.3	Aggregatibacter aphrophilus F0387	Bacteria	Proteobacteria	Gammaproteobacteria	Pasteurellales	Pasteurellaceae	Aggregatibacter	Aggregatibacter aphrophilus
679199.3	Prevotella sp. oral taxon 302 str. F0323	Bacteria	Bacteroidetes	Bacteroidia	Bacteroidales	Prevotellaceae	Alloprevotella	Alloprevotella rava
679202.3	Escherichia coli MS 85-1	Bacteria	Proteobacteria	Gammaproteobacteria	Enterobacterales	Enterobacteriaceae	Escherichia	Escherichia coli
679204.3	Escherichia coli MS 145-7	Bacteria	Proteobacteria	Gammaproteobacteria	Enterobacterales	Enterobacteriaceae	Escherichia	Escherichia coli
679205.4	Escherichia coli MS 124-1	Bacteria	Proteobacteria	Gammaproteobacteria	Enterobacterales	Enterobacteriaceae	Escherichia	Escherichia coli
679206.4	Escherichia coli MS 119-7	Bacteria	Proteobacteria	Gammaproteobacteria	Enterobacterales	Enterobacteriaceae	Escherichia	Escherichia coli
679207.4	Escherichia coli MS 107-1	Bacteria	Proteobacteria	Gammaproteobacteria	Enterobacterales	Enterobacteriaceae	Escherichia	Escherichia coli
679935.3	Alistipes finegoldii DSM 17242	Bacteria	Bacteroidetes	Bacteroidia	Bacteroidales	Rikenellaceae	Alistipes	Alistipes finegoldii
679937.3	Bacteroides coprosuis DSM 18011	Bacteria	Bacteroidetes	Bacteroidia	Bacteroidales	Bacteroidaceae	Bacteroides	Bacteroides coprosuis
680646.3	Rothia mucilaginosa DY-18	Bacteria	Actinobacteria	Actinobacteria	Micrococcales	Micrococcaceae	Rothia	Rothia mucilaginosa
681573.3	Streptococcus equi subsp. zooepidemicus BHS5	Bacteria	Firmicutes	Bacilli	Lactobacillales	Streptococcaceae	Streptococcus	Streptococcus equi
683082.3	Campylobacter jejuni subsp. jejuni 1336	Bacteria	Proteobacteria	Epsilonproteobacteria	Campylobacterales	Campylobacteraceae	Campylobacter	Campylobacter jejuni
683083.3	Campylobacter jejuni subsp. jejuni 414	Bacteria	Proteobacteria	Epsilonproteobacteria	Campylobacterales	Campylobacteraceae	Campylobacter	Campylobacter jejuni
684738.3	Lactococcus lactis subsp. lactis KF147	Bacteria	Firmicutes	Bacilli	Lactobacillales	Streptococcaceae	Lactococcus	Lactococcus lactis
684950.4	Helicobacter pylori 52	Bacteria	Proteobacteria	Epsilonproteobacteria	Campylobacterales	Helicobacteraceae	Helicobacter	Helicobacter pylori
685038.3	Escherichia coli O83:H1 str. NRG 857C	Bacteria	Proteobacteria	Gammaproteobacteria	Enterobacterales	Enterobacteriaceae	Escherichia	Escherichia coli
685039.3	Staphylococcus aureus subsp. aureus ED133	Bacteria	Firmicutes	Bacilli	Bacillales	Staphylococcaceae	Staphylococcus	Staphylococcus aureus
685445.4	Enterobacter aerogenes FGI35	Bacteria	Proteobacteria	Gammaproteobacteria	Enterobacterales	Enterobacteriaceae	Klebsiella	Klebsiella aerogenes
685727.3	Rhodococcus equi 103S	Bacteria	Actinobacteria	Actinobacteria	Corynebacteriales	Nocardiaceae	Rhodococcus	Rhodococcus hoagii
686659.3	Propionibacterium acnes SK187	Bacteria	Actinobacteria	Actinobacteria	Propionibacteriales	Propionibacteriaceae	Cutibacterium	Cutibacterium acnes
686660.3	Veillonella parvula ATCC 17745	Bacteria	Firmicutes	Negativicutes	Veillonellales	Veillonellaceae	Veillonella	Veillonella parvula
688245.4	Comamonas testosteroni CNB-2	Bacteria	Proteobacteria	Betaproteobacteria	Burkholderiales	Comamonadaceae	Comamonas	Comamonas testosteroni
692420.6	Bacillus amyloliquefaciens DSM7	Bacteria	Firmicutes	Bacilli	Bacillales	Bacillaceae	Bacillus	Bacillus amyloliquefaciens
693745.3	Helicobacter pylori B8	Bacteria	Proteobacteria	Epsilonproteobacteria	Campylobacterales	Helicobacteraceae	Helicobacter	Helicobacter pylori
693746.9	Oscillibacter valericigenes Sjm18-20	Bacteria	Firmicutes	Clostridia	Clostridiales	Oscillospiraceae	Oscillibacter	Oscillibacter valericigenes
693979.3	Bacteroides helcogenes P 36-108	Bacteria	Bacteroidetes	Bacteroidia	Bacteroidales	Bacteroidaceae	Bacteroides	Bacteroides helcogenes
693991.3	Fusobacterium nucleatum subsp. polymorphum F0401	Bacteria	Fusobacteria	Fusobacteriia	Fusobacteriales	Fusobacteriaceae	Fusobacterium	Fusobacterium nucleatum
695560.3	Lactobacillus amylovorus GRL 1112	Bacteria	Firmicutes	Bacilli	Lactobacillales	Lactobacillaceae	Lactobacillus	Lactobacillus amylovorus
695562.4	Lactobacillus amylovorus GRL1118	Bacteria	Firmicutes	Bacilli	Lactobacillales	Lactobacillaceae	Lactobacillus	Lactobacillus amylovorus
696281.4	Desulfotomaculum ruminis DSM 2154	Bacteria	Firmicutes	Clostridia	Clostridiales	Peptococcaceae	Desulfotomaculum	Desulfotomaculum ruminis
696369.3	Desulfotomaculum nigrificans DSM 574	Bacteria	Firmicutes	Clostridia	Clostridiales	Peptococcaceae	Desulfotomaculum	Desulfotomaculum nigrificans
696749.3	Acinetobacter baumannii 1656-2	Bacteria	Proteobacteria	Gammaproteobacteria	Pseudomonadales	Moraxellaceae	Acinetobacter	Acinetobacter baumannii
697283.3	Streptococcus pneumoniae gamPNI0373	Bacteria	Firmicutes	Bacilli	Lactobacillales	Streptococcaceae	Streptococcus	Streptococcus pneumoniae
698737.3	Staphylococcus lugdunensis HKU09-01	Bacteria	Firmicutes	Bacilli	Bacillales	Staphylococcaceae	Staphylococcus	Staphylococcus lugdunensis
699033.6	Clostridium difficile 2007855	Bacteria	Firmicutes	Clostridia	Clostridiales	Peptostreptococcaceae	Clostridioides	Clostridioides difficile
699034.5	Clostridium difficile BI1	Bacteria	Firmicutes	Clostridia	Clostridiales	Peptostreptococcaceae	Clostridioides	Clostridioides difficile
699035.5	Clostridium difficile M120	Bacteria	Firmicutes	Clostridia	Clostridiales	Peptostreptococcaceae	Clostridioides	Clostridioides difficile
699036.5	Clostridium difficile CF5	Bacteria	Firmicutes	Clostridia	Clostridiales	Peptostreptococcaceae	Clostridioides	Clostridioides difficile
699037.5	Clostridium difficile M68	Bacteria	Firmicutes	Clostridia	Clostridiales	Peptostreptococcaceae	Clostridioides	Clostridioides difficile
699185.3	Enterococcus faecalis S613	Bacteria	Firmicutes	Bacilli	Lactobacillales	Enterococcaceae	Enterococcus	Enterococcus faecalis
699186.3	Enterococcus faecalis R712	Bacteria	Firmicutes	Bacilli	Lactobacillales	Enterococcaceae	Enterococcus	Enterococcus faecalis
701177.3	Escherichia coli O55:H7 str. CB9615	Bacteria	Proteobacteria	Gammaproteobacteria	Enterobacterales	Enterobacteriaceae	Escherichia	Escherichia coli
701347.4	Enterobacter cloacae SCF1	Bacteria	Proteobacteria	Gammaproteobacteria	Enterobacterales	Enterobacteriaceae	Pluralibacter	[Enterobacter] lignolyticus
702438.4	Prevotella oulorum F0390	Bacteria	Bacteroidetes	Bacteroidia	Bacteroidales	Prevotellaceae	Prevotella	Prevotella oulorum
702439.3	Prevotella nigrescens F0103	Bacteria	Bacteroidetes	Bacteroidia	Bacteroidales	Prevotellaceae	Prevotella	Prevotella nigrescens
702443.3	Bacteroides ovatus SD CMC 3f	Bacteria	Bacteroidetes	Bacteroidia	Bacteroidales	Bacteroidaceae	Bacteroides	Bacteroides ovatus
702444.3	Bacteroides ovatus SD CC 2a	Bacteria	Bacteroidetes	Bacteroidia	Bacteroidales	Bacteroidaceae	Bacteroides	Bacteroides xylanisolvens
702446.3	Bacteroides vulgatus PC510	Bacteria	Bacteroidetes	Bacteroidia	Bacteroidales	Bacteroidaceae	Bacteroides	Bacteroides vulgatus
702447.3	Bacteroides xylanisolvens SD CC 1b	Bacteria	Bacteroidetes	Bacteroidia	Bacteroidales	Bacteroidaceae	Bacteroides	Bacteroides xylanisolvens
702448.3	Enterococcus faecalis PC1.1	Bacteria	Firmicutes	Bacilli	Lactobacillales	Enterococcaceae	Enterococcus	Enterococcus faecalis
702450.3	Turicibacter sp. PC909	Bacteria	Firmicutes	Erysipelotrichia	Erysipelotrichales	Erysipelotrichaceae	Turicibacter	Turicibacter sanguinis
702459.3	Bifidobacterium bifidum PRL2010	Bacteria	Actinobacteria	Actinobacteria	Bifidobacteriales	Bifidobacteriaceae	Bifidobacterium	Bifidobacterium bifidum
703339.3	Staphylococcus aureus 04-02981	Bacteria	Firmicutes	Bacilli	Bacillales	Staphylococcaceae	Staphylococcus	Staphylococcus aureus
706433.3	Solobacterium moorei F0204	Bacteria	Firmicutes	Erysipelotrichia	Erysipelotrichales	Erysipelotrichaceae	Solobacterium	Solobacterium moorei
706436.3	Capnocytophaga sp. oral taxon 329 str. F0087	Bacteria	Bacteroidetes	Flavobacteriia	Flavobacteriales	Flavobacteriaceae	Capnocytophaga	-
707232.3	Acinetobacter haemolyticus ATCC 19194	Bacteria	Proteobacteria	Gammaproteobacteria	Pseudomonadales	Moraxellaceae	Acinetobacter	Acinetobacter haemolyticus
709991.3	Odoribacter splanchnicus DSM 20712	Bacteria	Bacteroidetes	Bacteroidia	Bacteroidales	Odoribacteraceae	Odoribacter	Odoribacter splanchnicus
712938.3	Lactobacillus fermentum CECT 5716	Bacteria	Firmicutes	Bacilli	Lactobacillales	Lactobacillaceae	Lactobacillus	Lactobacillus fermentum
712961.3	Lactobacillus salivarius CECT 5713	Bacteria	Firmicutes	Bacilli	Lactobacillales	Lactobacillaceae	Lactobacillus	Lactobacillus salivarius
713605.5	Lactobacillus iners AB-1	Bacteria	Firmicutes	Bacilli	Lactobacillales	Lactobacillaceae	Lactobacillus	Lactobacillus iners
714313.3	Lactobacillus sanfranciscensis TMW 1.1304	Bacteria	Firmicutes	Bacilli	Lactobacillales	Lactobacillaceae	Lactobacillus	Lactobacillus sanfranciscensis
714359.3	Bacillus thuringiensis BMB171	Bacteria	Firmicutes	Bacilli	Bacillales	Bacillaceae	Bacillus	Bacillus thuringiensis
714961.3	Lysinibacillus fusiformis ZC1	Bacteria	Firmicutes	Bacilli	Bacillales	Bacillaceae	Lysinibacillus	Lysinibacillus fusiformis
714962.3	Escherichia coli IHE3034	Bacteria	Proteobacteria	Gammaproteobacteria	Enterobacterales	Enterobacteriaceae	Escherichia	Escherichia coli
716541.4	Enterobacter cloacae subsp. cloacae ATCC 13047	Bacteria	Proteobacteria	Gammaproteobacteria	Enterobacterales	Enterobacteriaceae	Enterobacter	Enterobacter cloacae complex
717608.3	Clostridium cf. saccharolyticum K10	Bacteria	Firmicutes	Clostridia	Clostridiales	Lachnospiraceae	Lachnoclostridium	[Clostridium] saccharolyticum
717959.3	Alistipes shahii WAL 8301	Bacteria	Bacteroidetes	Bacteroidia	Bacteroidales	Rikenellaceae	Alistipes	Alistipes shahii
717960.3	Eubacterium cylindroides T2-87	Bacteria	Firmicutes	Erysipelotrichia	Erysipelotrichales	Erysipelotrichaceae	Faecalitalea	Faecalitalea cylindroides
717961.3	Eubacterium siraeum V10Sc8a	Bacteria	Firmicutes	Clostridia	Clostridiales	Ruminococcaceae	Ruminiclostridium	[Eubacterium] siraeum
717962.3	Coprococcus catus GD/7	Bacteria	Firmicutes	Clostridia	Clostridiales	Lachnospiraceae	Coprococcus	Coprococcus catus
718251.5	Edwardsiella tarda FL6-60	Bacteria	Proteobacteria	Gammaproteobacteria	Enterobacterales	Hafniaceae	Edwardsiella	Edwardsiella tarda
718252.3	Faecalibacterium prausnitzii L2-6	Bacteria	Firmicutes	Clostridia	Clostridiales	Ruminococcaceae	Faecalibacterium	Faecalibacterium prausnitzii
718254.4	Enterobacter cloacae subsp. cloacae NCTC 9394	Bacteria	Proteobacteria	Gammaproteobacteria	Enterobacterales	Enterobacteriaceae	Enterobacter	Enterobacter cloacae complex
718255.3	Roseburia intestinalis XB6B4	Bacteria	Firmicutes	Clostridia	Clostridiales	Lachnospiraceae	Roseburia	Roseburia intestinalis
718274.8	Salmonella enterica subsp. enterica serovar Typhimurium str. T000240	Bacteria	Proteobacteria	Gammaproteobacteria	Enterobacterales	Enterobacteriaceae	Salmonella	Salmonella enterica
720554.3	Clostridium clariflavum DSM 19732	Bacteria	Firmicutes	Clostridia	Clostridiales	Ruminococcaceae	Ruminiclostridium	[Clostridium] clariflavum
720555.4	Bacillus atrophaeus 1942	Bacteria	Firmicutes	Bacilli	Bacillales	Bacillaceae	Bacillus	Bacillus atrophaeus
720557.3	Bacillus atrophaeus Detrick-2	Bacteria	Firmicutes	Bacilli	Bacillales	Bacillaceae	Bacillus	Bacillus atrophaeus
722438.3	Mycoplasma pneumoniae FH	Bacteria	Tenericutes	Mollicutes	Mycoplasmatales	Mycoplasmataceae	Mycoplasma	Mycoplasma pneumoniae
722911.3	Bifidobacterium longum subsp. longum F8	Bacteria	Actinobacteria	Actinobacteria	Bifidobacteriales	Bifidobacteriaceae	Bifidobacterium	Bifidobacterium longum
741093.3	Escherichia coli Xuzhou21	Bacteria	Proteobacteria	Gammaproteobacteria	Enterobacterales	Enterobacteriaceae	Escherichia	Escherichia coli
742722.3	Collinsella sp. 4_8_47FAA	Bacteria	Actinobacteria	Coriobacteriia	Coriobacteriales	Coriobacteriaceae	Collinsella	Collinsella aerofaciens
742723.3	Lachnospiraceae bacterium 2_1_46FAA	Bacteria	Firmicutes	Clostridia	Clostridiales	Lachnospiraceae	-	-
742725.3	Alistipes indistinctus YIT 12060	Bacteria	Bacteroidetes	Bacteroidia	Bacteroidales	Rikenellaceae	Alistipes	Alistipes indistinctus
742726.3	Barnesiella intestinihominis YIT 11860	Bacteria	Bacteroidetes	Bacteroidia	Bacteroidales	Barnesiellaceae	Barnesiella	Barnesiella intestinihominis
742727.4	Bacteroides oleiciplenus YIT 12058	Bacteria	Bacteroidetes	Bacteroidia	Bacteroidales	Bacteroidaceae	Bacteroides	Bacteroides oleiciplenus
742729.3	Bifidobacterium animalis subsp. lactis Bi-07	Bacteria	Actinobacteria	Actinobacteria	Bifidobacteriales	Bifidobacteriaceae	Bifidobacterium	Bifidobacterium animalis
742730.3	Citrobacter freundii 4_7_47CFAA	Bacteria	Proteobacteria	Gammaproteobacteria	Enterobacterales	Enterobacteriaceae	Citrobacter	Citrobacter freundii
742733.3	Clostridium citroniae WAL-17108	Bacteria	Firmicutes	Clostridia	Clostridiales	Lachnospiraceae	Lachnoclostridium	[Clostridium] citroniae
742735.4	Clostridium clostridioforme 2_1_49FAA	Bacteria	Firmicutes	Clostridia	Clostridiales	Lachnospiraceae	Lachnoclostridium	[Clostridium] clostridioforme
742737.3	Clostridium hathewayi WAL-18680	Bacteria	Firmicutes	Clostridia	Clostridiales	Clostridiaceae	Hungatella	Hungatella hathewayi
742738.3	Clostridium orbiscindens 1_3_50AFAA	Bacteria	Firmicutes	Clostridia	Clostridiales	-	Flavonifractor	Flavonifractor plautii
742739.3	Clostridium perfringens WAL-14572	Bacteria	Firmicutes	Clostridia	Clostridiales	Clostridiaceae	Clostridium	Clostridium perfringens
742740.3	Clostridium symbiosum WAL-14163	Bacteria	Firmicutes	Clostridia	Clostridiales	Lachnospiraceae	Lachnoclostridium	[Clostridium] symbiosum
742741.3	Clostridium symbiosum WAL-14673	Bacteria	Firmicutes	Clostridia	Clostridiales	Lachnospiraceae	Lachnoclostridium	[Clostridium] symbiosum
742742.3	Collinsella tanakaei YIT 12063	Bacteria	Actinobacteria	Coriobacteriia	Coriobacteriales	Coriobacteriaceae	Collinsella	Collinsella tanakaei
742743.3	Dialister succinatiphilus YIT 11850	Bacteria	Firmicutes	Negativicutes	Veillonellales	Veillonellaceae	Dialister	Dialister succinatiphilus
742765.5	Dorea formicigenerans 4_6_53AFAA	Bacteria	Firmicutes	Clostridia	Clostridiales	Lachnospiraceae	Dorea	Dorea formicigenerans
742766.3	Dysgonomonas gadei ATCC BAA-286	Bacteria	Bacteroidetes	Bacteroidia	Bacteroidales	Dysgonamonadaceae	Dysgonomonas	Dysgonomonas gadei
742767.3	Dysgonomonas mossii DSM 22836	Bacteria	Bacteroidetes	Bacteroidia	Bacteroidales	Dysgonamonadaceae	Dysgonomonas	Dysgonomonas mossii
742768.3	Eggerthella lenta 1_1_60AFAA	Bacteria	Actinobacteria	Coriobacteriia	Eggerthellales	Eggerthellaceae	Eggerthella	Eggerthella lenta
742813.4	Enterococcus saccharolyticus 30_1	Bacteria	Firmicutes	Bacilli	Lactobacillales	Enterococcaceae	Enterococcus	Enterococcus saccharolyticus
742814.3	Fusobacterium necrophorum subsp. funduliforme 1_1_36S	Bacteria	Fusobacteria	Fusobacteriia	Fusobacteriales	Fusobacteriaceae	Fusobacterium	Fusobacterium necrophorum
742816.3	Megamonas funiformis YIT 11815	Bacteria	Firmicutes	Negativicutes	Selenomonadales	Selenomonadaceae	Megamonas	Megamonas funiformis
742817.3	Odoribacter laneus YIT 12061	Bacteria	Bacteroidetes	Bacteroidia	Bacteroidales	Odoribacteraceae	Odoribacter	Odoribacter laneus
742818.3	Slackia piriformis YIT 12062	Bacteria	Actinobacteria	Coriobacteriia	Eggerthellales	Eggerthellaceae	Slackia	Slackia piriformis
742820.3	Streptococcus anginosus 1_2_62CV	Bacteria	Firmicutes	Bacilli	Lactobacillales	Streptococcaceae	Streptococcus	Streptococcus anginosus
742821.3	Sutterella wadsworthensis 3_1_45B	Bacteria	Proteobacteria	Betaproteobacteria	Burkholderiales	Sutterellaceae	Sutterella	Sutterella wadsworthensis
742823.3	Sutterella wadsworthensis 2_1_59BFAA	Bacteria	Proteobacteria	Betaproteobacteria	Burkholderiales	Sutterellaceae	Sutterella	Sutterella wadsworthensis
743719.3	Paenibacillus lactis 154	Bacteria	Firmicutes	Bacilli	Bacillales	Paenibacillaceae	Paenibacillus	Paenibacillus lactis
745368.3	Gemmiger formicilis strain ATCC 27749	Bacteria	Firmicutes	Clostridia	Clostridiales	Ruminococcaceae	Gemmiger	Gemmiger formicilis
746360.3	Pseudomonas fluorescens WH6	Bacteria	Proteobacteria	Gammaproteobacteria	Pseudomonadales	Pseudomonadaceae	Pseudomonas	Pseudomonas fluorescens
746361.3	Lactococcus lactis subsp. cremoris NZ9000	Bacteria	Firmicutes	Bacilli	Lactobacillales	Streptococcaceae	Lactococcus	Lactococcus lactis
748224.3	Faecalibacterium cf. prausnitzii KLE1255	Bacteria	Firmicutes	Clostridia	Clostridiales	Ruminococcaceae	Faecalibacterium	Faecalibacterium prausnitzii
748671.3	Lactobacillus crispatus ST1	Bacteria	Firmicutes	Bacilli	Lactobacillales	Lactobacillaceae	Lactobacillus	Lactobacillus crispatus
749219.3	Moraxella catarrhalis RH4	Bacteria	Proteobacteria	Gammaproteobacteria	Pseudomonadales	Moraxellaceae	Moraxella	Moraxella catarrhalis
749490.3	Enterococcus faecalis DAPTO 516	Bacteria	Firmicutes	Bacilli	Lactobacillales	Enterococcaceae	Enterococcus	Enterococcus faecalis
749491.3	Enterococcus faecalis TX2137	Bacteria	Firmicutes	Bacilli	Lactobacillales	Enterococcaceae	Enterococcus	Enterococcus faecalis
749492.3	Enterococcus faecalis TX2141	Bacteria	Firmicutes	Bacilli	Lactobacillales	Enterococcaceae	Enterococcus	Enterococcus faecalis
749493.3	Enterococcus faecalis TX4000	Bacteria	Firmicutes	Bacilli	Lactobacillales	Enterococcaceae	Enterococcus	Enterococcus faecalis
749494.3	Enterococcus faecalis TX4244	Bacteria	Firmicutes	Bacilli	Lactobacillales	Enterococcaceae	Enterococcus	Enterococcus faecalis
749495.4	Enterococcus faecalis TX4248	Bacteria	Firmicutes	Bacilli	Lactobacillales	Enterococcaceae	Enterococcus	Enterococcus faecalis
749496.3	Enterococcus faecalis TX0012	Bacteria	Firmicutes	Bacilli	Lactobacillales	Enterococcaceae	Enterococcus	Enterococcus faecalis
749497.3	Enterococcus faecalis TX0017	Bacteria	Firmicutes	Bacilli	Lactobacillales	Enterococcaceae	Enterococcus	Enterococcus faecalis
749498.3	Enterococcus faecalis TX0027	Bacteria	Firmicutes	Bacilli	Lactobacillales	Enterococcaceae	Enterococcus	Enterococcus faecalis
749499.3	Enterococcus faecalis TX0031	Bacteria	Firmicutes	Bacilli	Lactobacillales	Enterococcaceae	Enterococcus	Enterococcus faecalis
749500.3	Enterococcus faecalis TX0043	Bacteria	Firmicutes	Bacilli	Lactobacillales	Enterococcaceae	Enterococcus	Enterococcus faecalis
749501.3	Enterococcus faecalis TX0102	Bacteria	Firmicutes	Bacilli	Lactobacillales	Enterococcaceae	Enterococcus	Enterococcus faecalis
749502.3	Enterococcus faecalis TX0109	Bacteria	Firmicutes	Bacilli	Lactobacillales	Enterococcaceae	Enterococcus	Enterococcus faecalis
749503.3	Enterococcus faecalis TX0309A	Bacteria	Firmicutes	Bacilli	Lactobacillales	Enterococcaceae	Enterococcus	Enterococcus faecalis
749504.3	Enterococcus faecalis TX0309B	Bacteria	Firmicutes	Bacilli	Lactobacillales	Enterococcaceae	Enterococcus	Enterococcus faecalis
749505.3	Enterococcus faecalis TX0312	Bacteria	Firmicutes	Bacilli	Lactobacillales	Enterococcaceae	Enterococcus	Enterococcus faecalis
749506.3	Enterococcus faecalis TX0411	Bacteria	Firmicutes	Bacilli	Lactobacillales	Enterococcaceae	Enterococcus	Enterococcus faecalis
749507.3	Enterococcus faecalis TX0470	Bacteria	Firmicutes	Bacilli	Lactobacillales	Enterococcaceae	Enterococcus	Enterococcus faecalis
749508.3	Enterococcus faecalis TX0630	Bacteria	Firmicutes	Bacilli	Lactobacillales	Enterococcaceae	Enterococcus	Enterococcus faecalis
749509.5	Enterococcus faecalis TX0635 = WH245	Bacteria	Firmicutes	Bacilli	Lactobacillales	Enterococcaceae	Enterococcus	Enterococcus faecalis
749510.3	Enterococcus faecalis TX0645	Bacteria	Firmicutes	Bacilli	Lactobacillales	Enterococcaceae	Enterococcus	Enterococcus faecalis
749511.3	Enterococcus faecalis TX0855	Bacteria	Firmicutes	Bacilli	Lactobacillales	Enterococcaceae	Enterococcus	Enterococcus faecalis
749512.3	Enterococcus faecalis TX0860	Bacteria	Firmicutes	Bacilli	Lactobacillales	Enterococcaceae	Enterococcus	Enterococcus faecalis
749513.3	Enterococcus faecalis TX1302	Bacteria	Firmicutes	Bacilli	Lactobacillales	Enterococcaceae	Enterococcus	Enterococcus faecalis
749514.3	Enterococcus faecalis TX1341	Bacteria	Firmicutes	Bacilli	Lactobacillales	Enterococcaceae	Enterococcus	Enterococcus faecalis
749515.3	Enterococcus faecalis TX1342	Bacteria	Firmicutes	Bacilli	Lactobacillales	Enterococcaceae	Enterococcus	Enterococcus faecalis
749516.3	Enterococcus faecalis TX1346	Bacteria	Firmicutes	Bacilli	Lactobacillales	Enterococcaceae	Enterococcus	Enterococcus faecalis
749518.3	Enterococcus faecalis TX2134	Bacteria	Firmicutes	Bacilli	Lactobacillales	Enterococcaceae	Enterococcus	Enterococcus faecalis
749520.3	Enterococcus faecium TX0082	Bacteria	Firmicutes	Bacilli	Lactobacillales	Enterococcaceae	Enterococcus	Enterococcus faecium
749521.3	Enterococcus faecium TX0133A	Bacteria	Firmicutes	Bacilli	Lactobacillales	Enterococcaceae	Enterococcus	Enterococcus faecium
749523.3	Enterococcus faecium TX0133a04	Bacteria	Firmicutes	Bacilli	Lactobacillales	Enterococcaceae	Enterococcus	Enterococcus faecium
749524.3	Enterococcus faecium TX0133B	Bacteria	Firmicutes	Bacilli	Lactobacillales	Enterococcaceae	Enterococcus	Enterococcus faecium
749525.3	Enterococcus faecium TX0133C	Bacteria	Firmicutes	Bacilli	Lactobacillales	Enterococcaceae	Enterococcus	Enterococcus faecium
749527.3	Escherichia coli MS 21-1	Bacteria	Proteobacteria	Gammaproteobacteria	Enterobacterales	Enterobacteriaceae	Escherichia	Escherichia coli
749528.3	Escherichia coli MS 45-1	Bacteria	Proteobacteria	Gammaproteobacteria	Enterobacterales	Enterobacteriaceae	Escherichia	Escherichia coli
749531.3	Escherichia coli MS 69-1	Bacteria	Proteobacteria	Gammaproteobacteria	Enterobacterales	Enterobacteriaceae	Escherichia	Escherichia coli
749532.3	Escherichia coli MS 78-1	Bacteria	Proteobacteria	Gammaproteobacteria	Enterobacterales	Enterobacteriaceae	Escherichia	Escherichia coli
749533.3	Escherichia coli MS 84-1	Bacteria	Proteobacteria	Gammaproteobacteria	Enterobacterales	Enterobacteriaceae	Escherichia	Escherichia coli
749537.3	Escherichia coli MS 115-1	Bacteria	Proteobacteria	Gammaproteobacteria	Enterobacterales	Enterobacteriaceae	Escherichia	Escherichia coli
749538.3	Escherichia coli MS 116-1	Bacteria	Proteobacteria	Gammaproteobacteria	Enterobacterales	Enterobacteriaceae	Escherichia	Escherichia coli
749540.3	Escherichia coli MS 146-1	Bacteria	Proteobacteria	Gammaproteobacteria	Enterobacterales	Enterobacteriaceae	Escherichia	Escherichia coli
749545.3	Escherichia coli MS 182-1	Bacteria	Proteobacteria	Gammaproteobacteria	Enterobacterales	Enterobacteriaceae	Escherichia	Escherichia coli
749546.3	Escherichia coli MS 185-1	Bacteria	Proteobacteria	Gammaproteobacteria	Enterobacterales	Enterobacteriaceae	Escherichia	Escherichia coli
749547.3	Escherichia coli MS 187-1	Bacteria	Proteobacteria	Gammaproteobacteria	Enterobacterales	Enterobacteriaceae	Escherichia	Escherichia coli
749548.3	Escherichia coli MS 196-1	Bacteria	Proteobacteria	Gammaproteobacteria	Enterobacterales	Enterobacteriaceae	Escherichia	Escherichia coli
749549.3	Escherichia coli MS 198-1	Bacteria	Proteobacteria	Gammaproteobacteria	Enterobacterales	Enterobacteriaceae	Escherichia	Escherichia coli
749550.3	Escherichia coli MS 200-1	Bacteria	Proteobacteria	Gammaproteobacteria	Enterobacterales	Enterobacteriaceae	Escherichia	Escherichia coli
751585.3	Coprococcus sp. ART55/1	Bacteria	Firmicutes	Clostridia	Clostridiales	Lachnospiraceae	Coprococcus	-
752555.5	Prevotella bryantii B14	Bacteria	Bacteroidetes	Bacteroidia	Bacteroidales	Prevotellaceae	Prevotella	Prevotella bryantii
754025.3	Staphylococcus aureus subsp. aureus MRSA131	Bacteria	Firmicutes	Bacilli	Bacillales	Staphylococcaceae	Staphylococcus	Staphylococcus aureus
754026.3	Staphylococcus aureus subsp. aureus MRSA177	Bacteria	Firmicutes	Bacilli	Bacillales	Staphylococcaceae	Staphylococcus	Staphylococcus aureus
754077.4	Shigella sonnei str. Moseley	Bacteria	Proteobacteria	Gammaproteobacteria	Enterobacterales	Enterobacteriaceae	Shigella	Shigella sonnei
754093.4	Shigella dysenteriae 1617	Bacteria	Proteobacteria	Gammaproteobacteria	Enterobacterales	Enterobacteriaceae	Shigella	Shigella dysenteriae
754252.3	Propionibacterium freudenreichii subsp. shermanii CIRM-BIA1	Bacteria	Actinobacteria	Actinobacteria	Propionibacteriales	Propionibacteriaceae	Propionibacterium	Propionibacterium freudenreichii
754256.7	Actinobacillus pleuropneumoniae serovar 6 str. Femo	Bacteria	Proteobacteria	Gammaproteobacteria	Pasteurellales	Pasteurellaceae	Actinobacillus	Actinobacillus pleuropneumoniae
754331.3	Escherichia sp. TW09308	Bacteria	Proteobacteria	Gammaproteobacteria	Enterobacterales	Enterobacteriaceae	Escherichia	-
754333.3	Escherichia albertii TW11588	Bacteria	Proteobacteria	Gammaproteobacteria	Enterobacterales	Enterobacteriaceae	Escherichia	-
755731.4	Clostridium sp. BNL1100	Bacteria	Firmicutes	Clostridia	Clostridiales	Clostridiaceae	Clostridium	-
759350.3	Bifidobacterium longum subsp. suis JDM301	Bacteria	Actinobacteria	Actinobacteria	Bifidobacteriales	Bifidobacteriaceae	Bifidobacterium	Bifidobacterium longum
760568.4	Desulfotomaculum kuznetsovii DSM 6115	Bacteria	Firmicutes	Clostridia	Clostridiales	Peptococcaceae	Desulfotomaculum	Desulfotomaculum kuznetsovii
760570.3	Streptococcus parasanguinis ATCC 15912	Bacteria	Firmicutes	Bacilli	Lactobacillales	Streptococcaceae	Streptococcus	Streptococcus parasanguinis
760746.3	Streptococcus pneumoniae GA04375	Bacteria	Firmicutes	Bacilli	Lactobacillales	Streptococcaceae	Streptococcus	Streptococcus pneumoniae
760810.3	Streptococcus pneumoniae GA41317	Bacteria	Firmicutes	Bacilli	Lactobacillales	Streptococcaceae	Streptococcus	Streptococcus pneumoniae
762376.5	Achromobacter xylosoxidans A8	Bacteria	Proteobacteria	Betaproteobacteria	Burkholderiales	Alcaligenaceae	Achromobacter	Achromobacter xylosoxidans
762948.4	Rothia dentocariosa ATCC 17931	Bacteria	Actinobacteria	Actinobacteria	Micrococcales	Micrococcaceae	Rothia	Rothia dentocariosa
762962.3	Staphylococcus aureus subsp. aureus ATCC 51811	Bacteria	Firmicutes	Bacilli	Bacillales	Staphylococcaceae	Staphylococcus	Staphylococcus aureus
762966.3	Parasutterella excrementihominis YIT 11859	Bacteria	Proteobacteria	Betaproteobacteria	Burkholderiales	Sutterellaceae	Parasutterella	Parasutterella excrementihominis
762967.3	Sutterella parvirubra YIT 11816	Bacteria	Proteobacteria	Betaproteobacteria	Burkholderiales	Sutterellaceae	Sutterella	Sutterella parvirubra
762968.3	Paraprevotella clara YIT 11840	Bacteria	Bacteroidetes	Bacteroidia	Bacteroidales	Prevotellaceae	Paraprevotella	Paraprevotella clara
762982.3	Paraprevotella xylaniphila YIT 11841	Bacteria	Bacteroidetes	Bacteroidia	Bacteroidales	Prevotellaceae	Paraprevotella	Paraprevotella xylaniphila
762983.3	Succinatimonas hippei YIT 12066	Bacteria	Proteobacteria	Gammaproteobacteria	Aeromonadales	Succinivibrionaceae	Succinatimonas	Succinatimonas hippei
762984.3	Bacteroides clarus YIT 12056	Bacteria	Bacteroidetes	Bacteroidia	Bacteroidales	Bacteroidaceae	Bacteroides	Bacteroides clarus
763034.3	Bacteroides fluxus YIT 12057	Bacteria	Bacteroidetes	Bacteroidia	Bacteroidales	Bacteroidaceae	Bacteroides	Bacteroides fluxus
765057.3	Propionibacterium acnes HL096PA3	Bacteria	Actinobacteria	Actinobacteria	Propionibacteriales	Propionibacteriaceae	Cutibacterium	Cutibacterium acnes
765058.3	Propionibacterium acnes HL096PA2	Bacteria	Actinobacteria	Actinobacteria	Propionibacteriales	Propionibacteriaceae	Cutibacterium	Cutibacterium acnes
765061.3	Propionibacterium acnes HL103PA1	Bacteria	Actinobacteria	Actinobacteria	Propionibacteriales	Propionibacteriaceae	Cutibacterium	Cutibacterium acnes
765063.3	Propionibacterium acnes HL099PA1	Bacteria	Actinobacteria	Actinobacteria	Propionibacteriales	Propionibacteriaceae	Cutibacterium	Cutibacterium acnes
765064.3	Propionibacterium acnes HL097PA1	Bacteria	Actinobacteria	Actinobacteria	Propionibacteriales	Propionibacteriaceae	Cutibacterium	Cutibacterium acnes
765065.3	Propionibacterium acnes HL020PA1	Bacteria	Actinobacteria	Actinobacteria	Propionibacteriales	Propionibacteriaceae	Cutibacterium	Cutibacterium acnes
765066.3	Propionibacterium acnes HL053PA1	Bacteria	Actinobacteria	Actinobacteria	Propionibacteriales	Propionibacteriaceae	Cutibacterium	Cutibacterium acnes
765067.3	Propionibacterium acnes HL053PA2	Bacteria	Actinobacteria	Actinobacteria	Propionibacteriales	Propionibacteriaceae	Cutibacterium	Cutibacterium acnes
765068.3	Propionibacterium acnes HL045PA1	Bacteria	Actinobacteria	Actinobacteria	Propionibacteriales	Propionibacteriaceae	Cutibacterium	Cutibacterium acnes
765069.3	Propionibacterium acnes HL013PA1	Bacteria	Actinobacteria	Actinobacteria	Propionibacteriales	Propionibacteriaceae	Cutibacterium	Cutibacterium acnes
765070.3	Propionibacterium acnes HL013PA2	Bacteria	Actinobacteria	Actinobacteria	Propionibacteriales	Propionibacteriaceae	Cutibacterium	Cutibacterium acnes
765071.3	Propionibacterium acnes HL078PA1	Bacteria	Actinobacteria	Actinobacteria	Propionibacteriales	Propionibacteriaceae	Cutibacterium	Cutibacterium acnes
765072.3	Propionibacterium acnes HL043PA1	Bacteria	Actinobacteria	Actinobacteria	Propionibacteriales	Propionibacteriaceae	Cutibacterium	Cutibacterium acnes
765073.3	Propionibacterium acnes HL043PA2	Bacteria	Actinobacteria	Actinobacteria	Propionibacteriales	Propionibacteriaceae	Cutibacterium	Cutibacterium acnes
765074.3	Propionibacterium acnes HL072PA1	Bacteria	Actinobacteria	Actinobacteria	Propionibacteriales	Propionibacteriaceae	Cutibacterium	Cutibacterium acnes
765075.3	Propionibacterium acnes HL072PA2	Bacteria	Actinobacteria	Actinobacteria	Propionibacteriales	Propionibacteriaceae	Cutibacterium	Cutibacterium acnes
765076.3	Propionibacterium acnes HL074PA1	Bacteria	Actinobacteria	Actinobacteria	Propionibacteriales	Propionibacteriaceae	Cutibacterium	Cutibacterium acnes
765077.3	Propionibacterium acnes HL110PA1	Bacteria	Actinobacteria	Actinobacteria	Propionibacteriales	Propionibacteriaceae	Cutibacterium	Cutibacterium acnes
765078.3	Propionibacterium acnes HL110PA2	Bacteria	Actinobacteria	Actinobacteria	Propionibacteriales	Propionibacteriaceae	Cutibacterium	Cutibacterium acnes
765079.3	Propionibacterium acnes HL110PA3	Bacteria	Actinobacteria	Actinobacteria	Propionibacteriales	Propionibacteriaceae	Cutibacterium	Cutibacterium acnes
765080.3	Propionibacterium acnes HL110PA4	Bacteria	Actinobacteria	Actinobacteria	Propionibacteriales	Propionibacteriaceae	Cutibacterium	Cutibacterium acnes
765082.3	Propionibacterium acnes HL087PA2	Bacteria	Actinobacteria	Actinobacteria	Propionibacteriales	Propionibacteriaceae	Cutibacterium	Cutibacterium acnes
765083.3	Propionibacterium acnes HL087PA3	Bacteria	Actinobacteria	Actinobacteria	Propionibacteriales	Propionibacteriaceae	Cutibacterium	Cutibacterium acnes
765084.3	Propionibacterium acnes HL060PA1	Bacteria	Actinobacteria	Actinobacteria	Propionibacteriales	Propionibacteriaceae	Cutibacterium	Cutibacterium acnes
765085.3	Propionibacterium acnes HL038PA1	Bacteria	Actinobacteria	Actinobacteria	Propionibacteriales	Propionibacteriaceae	Cutibacterium	Cutibacterium acnes
765086.3	Propionibacterium acnes HL092PA1	Bacteria	Actinobacteria	Actinobacteria	Propionibacteriales	Propionibacteriaceae	Cutibacterium	Cutibacterium acnes
765087.3	Propionibacterium acnes HL083PA1	Bacteria	Actinobacteria	Actinobacteria	Propionibacteriales	Propionibacteriaceae	Cutibacterium	Cutibacterium acnes
765088.3	Propionibacterium acnes HL083PA2	Bacteria	Actinobacteria	Actinobacteria	Propionibacteriales	Propionibacteriaceae	Cutibacterium	Cutibacterium acnes
765089.3	Propionibacterium acnes HL025PA1	Bacteria	Actinobacteria	Actinobacteria	Propionibacteriales	Propionibacteriaceae	Cutibacterium	Cutibacterium acnes
765091.3	Propionibacterium acnes HL059PA1	Bacteria	Actinobacteria	Actinobacteria	Propionibacteriales	Propionibacteriaceae	Cutibacterium	Cutibacterium acnes
765092.3	Propionibacterium acnes HL059PA2	Bacteria	Actinobacteria	Actinobacteria	Propionibacteriales	Propionibacteriaceae	Cutibacterium	Cutibacterium acnes
765093.3	Propionibacterium acnes HL086PA1	Bacteria	Actinobacteria	Actinobacteria	Propionibacteriales	Propionibacteriaceae	Cutibacterium	Cutibacterium acnes
765094.3	Propionibacterium acnes HL046PA1	Bacteria	Actinobacteria	Actinobacteria	Propionibacteriales	Propionibacteriaceae	Cutibacterium	Cutibacterium acnes
765095.3	Propionibacterium acnes HL046PA2	Bacteria	Actinobacteria	Actinobacteria	Propionibacteriales	Propionibacteriaceae	Cutibacterium	Cutibacterium acnes
765096.3	Propionibacterium acnes HL005PA1	Bacteria	Actinobacteria	Actinobacteria	Propionibacteriales	Propionibacteriaceae	Cutibacterium	Cutibacterium acnes
765097.3	Propionibacterium acnes HL005PA2	Bacteria	Actinobacteria	Actinobacteria	Propionibacteriales	Propionibacteriaceae	Cutibacterium	Cutibacterium acnes
765099.3	Propionibacterium acnes HL005PA4	Bacteria	Actinobacteria	Actinobacteria	Propionibacteriales	Propionibacteriaceae	Cutibacterium	Cutibacterium acnes
765100.3	Propionibacterium acnes HL050PA1	Bacteria	Actinobacteria	Actinobacteria	Propionibacteriales	Propionibacteriaceae	Cutibacterium	Cutibacterium acnes
765101.3	Propionibacterium acnes HL050PA2	Bacteria	Actinobacteria	Actinobacteria	Propionibacteriales	Propionibacteriaceae	Cutibacterium	Cutibacterium acnes
765102.3	Propionibacterium acnes HL050PA3	Bacteria	Actinobacteria	Actinobacteria	Propionibacteriales	Propionibacteriaceae	Cutibacterium	Cutibacterium acnes
765103.3	Propionibacterium acnes HL030PA1	Bacteria	Actinobacteria	Actinobacteria	Propionibacteriales	Propionibacteriaceae	Cutibacterium	Cutibacterium acnes
765105.8	Propionibacterium acnes HL001PA1	Bacteria	Actinobacteria	Actinobacteria	Propionibacteriales	Propionibacteriaceae	Cutibacterium	Cutibacterium acnes
765106.3	Propionibacterium acnes HL036PA1	Bacteria	Actinobacteria	Actinobacteria	Propionibacteriales	Propionibacteriaceae	Cutibacterium	Cutibacterium acnes
765107.3	Propionibacterium acnes HL036PA2	Bacteria	Actinobacteria	Actinobacteria	Propionibacteriales	Propionibacteriaceae	Cutibacterium	Cutibacterium acnes
765109.3	Propionibacterium acnes HL044PA1	Bacteria	Actinobacteria	Actinobacteria	Propionibacteriales	Propionibacteriaceae	Propionibacterium	Propionibacterium humerusii
765110.3	Propionibacterium acnes HL067PA1	Bacteria	Actinobacteria	Actinobacteria	Propionibacteriales	Propionibacteriaceae	Cutibacterium	Cutibacterium acnes
765111.3	Propionibacterium acnes HL027PA1	Bacteria	Actinobacteria	Actinobacteria	Propionibacteriales	Propionibacteriaceae	Cutibacterium	Cutibacterium acnes
765112.3	Propionibacterium acnes HL027PA2	Bacteria	Actinobacteria	Actinobacteria	Propionibacteriales	Propionibacteriaceae	Cutibacterium	Cutibacterium acnes
765113.3	Propionibacterium acnes HL063PA1	Bacteria	Actinobacteria	Actinobacteria	Propionibacteriales	Propionibacteriaceae	Cutibacterium	Cutibacterium acnes
765114.3	Propionibacterium acnes HL063PA2	Bacteria	Actinobacteria	Actinobacteria	Propionibacteriales	Propionibacteriaceae	Cutibacterium	Cutibacterium acnes
765115.3	Propionibacterium acnes HL002PA1	Bacteria	Actinobacteria	Actinobacteria	Propionibacteriales	Propionibacteriaceae	Cutibacterium	Cutibacterium acnes
765116.3	Propionibacterium acnes HL002PA2	Bacteria	Actinobacteria	Actinobacteria	Propionibacteriales	Propionibacteriaceae	Cutibacterium	Cutibacterium acnes
765117.3	Propionibacterium acnes HL002PA3	Bacteria	Actinobacteria	Actinobacteria	Propionibacteriales	Propionibacteriaceae	Cutibacterium	Cutibacterium acnes
765118.3	Propionibacterium acnes HL007PA1	Bacteria	Actinobacteria	Actinobacteria	Propionibacteriales	Propionibacteriaceae	Cutibacterium	Cutibacterium acnes
765119.3	Propionibacterium acnes HL056PA1	Bacteria	Actinobacteria	Actinobacteria	Propionibacteriales	Propionibacteriaceae	Cutibacterium	Cutibacterium acnes
765120.3	Propionibacterium acnes HL082PA1	Bacteria	Actinobacteria	Actinobacteria	Propionibacteriales	Propionibacteriaceae	Cutibacterium	Cutibacterium acnes
765121.3	Propionibacterium acnes HL082PA2	Bacteria	Actinobacteria	Actinobacteria	Propionibacteriales	Propionibacteriaceae	Cutibacterium	Cutibacterium acnes
765122.3	Propionibacterium acnes HL037PA1	Bacteria	Actinobacteria	Actinobacteria	Propionibacteriales	Propionibacteriaceae	Cutibacterium	Cutibacterium acnes
765123.3	Propionibacterium acnes HL037PA2	Bacteria	Actinobacteria	Actinobacteria	Propionibacteriales	Propionibacteriaceae	Propionibacterium	Propionibacterium humerusii
766162.3	Shigella sonnei 3226-85	Bacteria	Proteobacteria	Gammaproteobacteria	Enterobacterales	Enterobacteriaceae	Shigella	Shigella sonnei
766760.3	Bacillus licheniformis 9945A	Bacteria	Firmicutes	Bacilli	Bacillales	Bacillaceae	Bacillus	Bacillus paralicheniformis
767029.3	Propionibacterium propionicum F0230a	Bacteria	Actinobacteria	Actinobacteria	Propionibacteriales	Propionibacteriaceae	Pseudopropionibacterium	Pseudopropionibacterium propionicum
767031.3	Prevotella denticola F0289	Bacteria	Bacteroidetes	Bacteroidia	Bacteroidales	Prevotellaceae	Prevotella	Prevotella denticola
767453.3	Lactobacillus fermentum F-6	Bacteria	Firmicutes	Bacilli	Lactobacillales	Lactobacillaceae	Lactobacillus	Lactobacillus fermentum
767455.3	Lactobacillus delbrueckii subsp. bulgaricus ND02	Bacteria	Firmicutes	Bacilli	Lactobacillales	Lactobacillaceae	Lactobacillus	Lactobacillus delbrueckii
767462.3	Lactobacillus helveticus H10	Bacteria	Firmicutes	Bacilli	Lactobacillales	Lactobacillaceae	Lactobacillus	Lactobacillus helveticus
767463.3	Streptococcus thermophilus ND03	Bacteria	Firmicutes	Bacilli	Lactobacillales	Streptococcaceae	Streptococcus	Streptococcus thermophilus
767468.48	Lactobacillus plantarum subsp. plantarum P-8	Bacteria	Firmicutes	Bacilli	Lactobacillales	Lactobacillaceae	Lactobacillus	Lactobacillus plantarum
767817.3	Desulfotomaculum gibsoniae DSM 7213	Bacteria	Firmicutes	Clostridia	Clostridiales	Peptococcaceae	Desulfotomaculum	Desulfotomaculum gibsoniae
768486.3	Enterococcus hirae ATCC 9790	Bacteria	Firmicutes	Bacilli	Lactobacillales	Enterococcaceae	Enterococcus	Enterococcus hirae
768713.4	Finegoldia magna ACS-171-V-Col3	Bacteria	Firmicutes	Tissierellia	Tissierellales	Peptoniphilaceae	Finegoldia	Finegoldia magna
768726.4	Streptococcus mitis bv. 2 str. F0392	Bacteria	Firmicutes	Bacilli	Lactobacillales	Streptococcaceae	Streptococcus	Streptococcus mitis
768727.3	Veillonella parvula ACS-068-V-Sch12	Bacteria	Firmicutes	Negativicutes	Veillonellales	Veillonellaceae	Veillonella	Veillonella parvula
791161.5	Enterococcus faecium PC4.1	Bacteria	Firmicutes	Bacilli	Lactobacillales	Enterococcaceae	Enterococcus	Enterococcus faecium
796392.4	Escherichia coli MS 79-10	Bacteria	Proteobacteria	Gammaproteobacteria	Enterobacterales	Enterobacteriaceae	Escherichia	Escherichia coli
796937.3	Eubacteriaceae bacterium ACC19a	Bacteria	Firmicutes	Clostridia	Clostridiales	Peptostreptococcaceae	Peptoanaerobacter	Peptoanaerobacter stomatis
796939.3	Eubacteriaceae bacterium CM2	Bacteria	Firmicutes	Clostridia	Clostridiales	Peptostreptococcaceae	Peptoanaerobacter	Peptoanaerobacter stomatis
796940.3	Eubacteriaceae bacterium CM5	Bacteria	Firmicutes	Clostridia	Clostridiales	Peptostreptococcaceae	Peptoanaerobacter	Peptoanaerobacter stomatis
796941.3	Eubacteriaceae bacterium OBRC8	Bacteria	Firmicutes	Clostridia	Clostridiales	Peptostreptococcaceae	Peptoanaerobacter	Peptoanaerobacter stomatis
796942.3	Lachnospiraceae bacterium ACC2	Bacteria	Firmicutes	Clostridia	Clostridiales	Lachnospiraceae	Stomatobaculum	Stomatobaculum longum
798130.4	Pseudomonas aeruginosa 39016	Bacteria	Proteobacteria	Gammaproteobacteria	Pseudomonadales	Pseudomonadaceae	Pseudomonas	Pseudomonas aeruginosa
857292.4	Streptococcus intermedius F0395	Bacteria	Firmicutes	Bacilli	Lactobacillales	Streptococcaceae	Streptococcus	Streptococcus intermedius
857293.11	Caloramator australicus RC3	Bacteria	Firmicutes	Clostridia	Clostridiales	Clostridiaceae	Caloramator	Caloramator australicus
861454.3	Lachnospiraceae bacterium oral taxon 082 str. F0431	Bacteria	Firmicutes	Clostridia	Clostridiales	Lachnospiraceae	-	-
862513.3	Neisseria meningitidis ATCC 13091	Bacteria	Proteobacteria	Betaproteobacteria	Neisseriales	Neisseriaceae	Neisseria	Neisseria meningitidis
862514.3	Pediococcus acidilactici DSM 20284	Bacteria	Firmicutes	Bacilli	Lactobacillales	Lactobacillaceae	Pediococcus	Pediococcus acidilactici
862516.3	Staphylococcus aureus subsp. aureus ATCC BAA-39	Bacteria	Firmicutes	Bacilli	Bacillales	Staphylococcaceae	Staphylococcus	Staphylococcus aureus
862962.3	Bacteroides fragilis 638R	Bacteria	Bacteroidetes	Bacteroidia	Bacteroidales	Bacteroidaceae	Bacteroides	Bacteroides fragilis
862964.3	Haemophilus influenzae 10810	Bacteria	Proteobacteria	Gammaproteobacteria	Pasteurellales	Pasteurellaceae	Haemophilus	Haemophilus influenzae
862965.3	Haemophilus parainfluenzae T3T1	Bacteria	Proteobacteria	Gammaproteobacteria	Pasteurellales	Pasteurellaceae	Haemophilus	Haemophilus parainfluenzae
862970.3	Streptococcus anginosus C1051	Bacteria	Firmicutes	Bacilli	Lactobacillales	Streptococcaceae	Streptococcus	Streptococcus anginosus
862971.3	Streptococcus anginosus C238	Bacteria	Firmicutes	Bacilli	Lactobacillales	Streptococcaceae	Streptococcus	Streptococcus anginosus
863638.3	Clostridium acetobutylicum EA 2018	Bacteria	Firmicutes	Clostridia	Clostridiales	Clostridiaceae	Clostridium	Clostridium acetobutylicum
864564.3	Parascardovia denticolens DSM 10105	Bacteria	Actinobacteria	Actinobacteria	Bifidobacteriales	Bifidobacteriaceae	Parascardovia	Parascardovia denticolens
864565.3	Eubacterium yurii subsp. margaretiae ATCC 43715	Bacteria	Firmicutes	Clostridia	Clostridiales	Peptostreptococcaceae	Peptoanaerobacter	[Eubacterium] yurii
864566.3	Campylobacter coli JV20	Bacteria	Proteobacteria	Epsilonproteobacteria	Campylobacterales	Campylobacteraceae	Campylobacter	Campylobacter coli
864567.3	Streptococcus mitis ATCC 6249	Bacteria	Firmicutes	Bacilli	Lactobacillales	Streptococcaceae	Streptococcus	Streptococcus mitis
864568.3	Streptococcus pyogenes ATCC 10782	Bacteria	Firmicutes	Bacilli	Lactobacillales	Streptococcaceae	Streptococcus	Streptococcus pyogenes
864569.5	Streptococcus bovis ATCC 700338	Bacteria	Firmicutes	Bacilli	Lactobacillales	Streptococcaceae	Streptococcus	Streptococcus equinus
866344.4	Helicobacter pylori F16	Bacteria	Proteobacteria	Epsilonproteobacteria	Campylobacterales	Helicobacteraceae	Helicobacter	Helicobacter pylori
866630.3	Haemophilus influenzae F3031	Bacteria	Proteobacteria	Gammaproteobacteria	Pasteurellales	Pasteurellaceae	Haemophilus	Haemophilus influenzae
866770.3	Mobiluncus mulieris FB024-16	Bacteria	Actinobacteria	Actinobacteria	Actinomycetales	Actinomycetaceae	Mobiluncus	Mobiluncus mulieris
866771.4	Prevotella disiens FB035-09AN	Bacteria	Bacteroidetes	Bacteroidia	Bacteroidales	Prevotellaceae	Prevotella	Prevotella disiens
866773.4	Finegoldia magna BVS033A4	Bacteria	Firmicutes	Tissierellia	Tissierellales	Peptoniphilaceae	Finegoldia	Finegoldia magna
866776.4	Veillonella atypica ACS-049-V-Sch6	Bacteria	Firmicutes	Negativicutes	Veillonellales	Veillonellaceae	Veillonella	Veillonella atypica
866777.3	Bifidobacterium breve ACS-071-V-Sch8b	Bacteria	Actinobacteria	Actinobacteria	Bifidobacteriales	Bifidobacteriaceae	Bifidobacterium	Bifidobacterium breve
866778.4	Veillonella atypica ACS-134-V-Col7a	Bacteria	Firmicutes	Negativicutes	Veillonellales	Veillonellaceae	Veillonella	Veillonella atypica
866779.4	Finegoldia magna SY403409CC001050417	Bacteria	Firmicutes	Tissierellia	Tissierellales	Peptoniphilaceae	Finegoldia	Finegoldia magna
868129.3	Prevotella bivia DSM 20514	Bacteria	Bacteroidetes	Bacteroidia	Bacteroidales	Prevotellaceae	Prevotella	Prevotella bivia
868595.4	Desulfotomaculum carboxydivorans CO-1-SRB	Bacteria	Firmicutes	Clostridia	Clostridiales	Peptococcaceae	Desulfotomaculum	Desulfotomaculum nigrificans
869215.3	Streptococcus pneumoniae OXC141	Bacteria	Firmicutes	Bacilli	Lactobacillales	Streptococcaceae	Streptococcus	Streptococcus pneumoniae
869216.3	Streptococcus pneumoniae INV200	Bacteria	Firmicutes	Bacilli	Lactobacillales	Streptococcaceae	Streptococcus	Streptococcus pneumoniae
869269.3	Streptococcus pneumoniae INV104	Bacteria	Firmicutes	Bacilli	Lactobacillales	Streptococcaceae	Streptococcus	Streptococcus pneumoniae
869303.3	Streptococcus pneumoniae SPN034156	Bacteria	Firmicutes	Bacilli	Lactobacillales	Streptococcaceae	Streptococcus	Streptococcus pneumoniae
869304.3	Streptococcus pneumoniae SPN034183	Bacteria	Firmicutes	Bacilli	Lactobacillales	Streptococcaceae	Streptococcus	Streptococcus pneumoniae
869311.3	Streptococcus pneumoniae SPN032672	Bacteria	Firmicutes	Bacilli	Lactobacillales	Streptococcaceae	Streptococcus	Streptococcus pneumoniae
869312.3	Streptococcus pneumoniae SPN033038	Bacteria	Firmicutes	Bacilli	Lactobacillales	Streptococcaceae	Streptococcus	Streptococcus pneumoniae
869683.4	Escherichia coli 96.154	Bacteria	Proteobacteria	Gammaproteobacteria	Enterobacterales	Enterobacteriaceae	Escherichia	Escherichia coli
869729.3	Escherichia coli UM146	Bacteria	Proteobacteria	Gammaproteobacteria	Enterobacterales	Enterobacteriaceae	Escherichia	Escherichia coli
869816.3	Staphylococcus aureus subsp. aureus JKD6159	Bacteria	Firmicutes	Bacilli	Bacillales	Staphylococcaceae	Staphylococcus	Staphylococcus aureus
871325.5	Bacteroides faecichinchillae strain DSM 26883	Bacteria	Bacteroidetes	Bacteroidia	Bacteroidales	Bacteroidaceae	Bacteroides	Bacteroides faecichinchillae
871562.3	Bifidobacterium dentium ATCC 27679	Bacteria	Actinobacteria	Actinobacteria	Bifidobacteriales	Bifidobacteriaceae	Bifidobacterium	Bifidobacterium dentium
871571.3	Mobiluncus mulieris ATCC 35239	Bacteria	Actinobacteria	Actinobacteria	Actinomycetales	Actinomycetaceae	Mobiluncus	Mobiluncus mulieris
871585.3	Acinetobacter calcoaceticus PHEA-2	Bacteria	Proteobacteria	Gammaproteobacteria	Pseudomonadales	Moraxellaceae	Acinetobacter	Acinetobacter pittii
871665.22	Blautia faecis strain MSK.18.51	Bacteria	Firmicutes	Clostridia	Clostridiales	Lachnospiraceae	Blautia	Blautia faecis
871665.24	Blautia faecis strain MSK.14.13	Bacteria	Firmicutes	Clostridia	Clostridiales	Lachnospiraceae	Blautia	Blautia faecis
871665.25	Blautia faecis strain MSK.11.45	Bacteria	Firmicutes	Clostridia	Clostridiales	Lachnospiraceae	Blautia	Blautia faecis
873447.3	Streptococcus parauberis NCFD 2020	Bacteria	Firmicutes	Bacilli	Lactobacillales	Streptococcaceae	Streptococcus	Streptococcus parauberis
873513.3	Prevotella buccae ATCC 33574	Bacteria	Bacteroidetes	Bacteroidia	Bacteroidales	Prevotellaceae	Prevotella	Prevotella buccae
873517.3	Capnocytophaga ochracea F0287	Bacteria	Bacteroidetes	Flavobacteriia	Flavobacteriales	Flavobacteriaceae	Capnocytophaga	Capnocytophaga ochracea
873533.3	Prevotella oralis ATCC 33269	Bacteria	Bacteroidetes	Bacteroidia	Bacteroidales	Prevotellaceae	Prevotella	Prevotella oralis
876138.3	Streptococcus agalactiae FSL S3-026	Bacteria	Firmicutes	Bacilli	Lactobacillales	Streptococcaceae	Streptococcus	Streptococcus agalactiae
878320.4	Aeromonas caviae Ae398	Bacteria	Proteobacteria	Gammaproteobacteria	Aeromonadales	Aeromonadaceae	Aeromonas	Aeromonas caviae
879243.3	Porphyromonas asaccharolytica DSM 20707	Bacteria	Bacteroidetes	Bacteroidia	Bacteroidales	Porphyromonadaceae	Porphyromonas	Porphyromonas asaccharolytica
879295.3	Lactobacillus iners SPIN 1401G	Bacteria	Firmicutes	Bacilli	Lactobacillales	Lactobacillaceae	Lactobacillus	Lactobacillus iners
879296.3	Lactobacillus iners SPIN 2503V10-D	Bacteria	Firmicutes	Bacilli	Lactobacillales	Lactobacillaceae	Lactobacillus	Lactobacillus iners
879298.3	Lactobacillus iners LactinV 03V1-b	Bacteria	Firmicutes	Bacilli	Lactobacillales	Lactobacillaceae	Lactobacillus	Lactobacillus iners
879299.3	Lactobacillus iners LactinV 09V1-c	Bacteria	Firmicutes	Bacilli	Lactobacillales	Lactobacillaceae	Lactobacillus	Lactobacillus iners
879300.3	Lactobacillus iners LactinV 11V1-d	Bacteria	Firmicutes	Bacilli	Lactobacillales	Lactobacillaceae	Lactobacillus	Lactobacillus iners
879301.3	Lactobacillus iners LEAF 2053A-b	Bacteria	Firmicutes	Bacilli	Lactobacillales	Lactobacillaceae	Lactobacillus	Lactobacillus iners
879302.3	Lactobacillus iners LEAF 2052A-d	Bacteria	Firmicutes	Bacilli	Lactobacillales	Lactobacillaceae	Lactobacillus	Lactobacillus iners
879303.3	Lactobacillus iners LEAF 2062A-h1	Bacteria	Firmicutes	Bacilli	Lactobacillales	Lactobacillaceae	Lactobacillus	Lactobacillus iners
879304.3	Lactobacillus iners LEAF 3008A-a	Bacteria	Firmicutes	Bacilli	Lactobacillales	Lactobacillaceae	Lactobacillus	Lactobacillus iners
879305.3	Anaerococcus prevotii ACS-065-V-Col13	Bacteria	Firmicutes	Tissierellia	Tissierellales	Peptoniphilaceae	Anaerococcus	Anaerococcus prevotii
879306.3	Anaerococcus hydrogenalis ACS-025-V-Sch4	Bacteria	Firmicutes	Tissierellia	Tissierellales	Peptoniphilaceae	Anaerococcus	Anaerococcus hydrogenalis
879309.3	Veillonella sp. oral taxon 158 str. F0412	Bacteria	Firmicutes	Negativicutes	Veillonellales	Veillonellaceae	Veillonella	-
879462.4	Escherichia coli str. K-12 substr. MG1655star	Bacteria	Proteobacteria	Gammaproteobacteria	Enterobacterales	Enterobacteriaceae	Escherichia	Escherichia coli
880074.29	Barnesiella viscericola DSM 18177 strain C46, DSM 18177	Bacteria	Bacteroidetes	Bacteroidia	Bacteroidales	Barnesiellaceae	Barnesiella	Barnesiella viscericola
880526.4	Rikenella microfusus DSM 15922	Bacteria	Bacteroidetes	Bacteroidia	Bacteroidales	Rikenellaceae	Rikenella	Rikenella microfusus
880592.5	Lactobacillus rhamnosus R0011	Bacteria	Firmicutes	Bacilli	Lactobacillales	Lactobacillaceae	Lactobacillus	Lactobacillus rhamnosus
880633.7	Lactobacillus helveticus R0052	Bacteria	Firmicutes	Bacilli	Lactobacillales	Lactobacillaceae	Lactobacillus	Lactobacillus helveticus
882095.3	Listeria monocytogenes ATCC 19117	Bacteria	Firmicutes	Bacilli	Bacillales	Listeriaceae	Listeria	Listeria monocytogenes
883062.5	Bifidobacterium bifidum S17	Bacteria	Actinobacteria	Actinobacteria	Bifidobacteriales	Bifidobacteriaceae	Bifidobacterium	Bifidobacterium bifidum
883077.3	Actinomyces turicensis ACS-279-V-Col4	Bacteria	Actinobacteria	Actinobacteria	Actinomycetales	Actinomycetaceae	Actinomyces	Actinomyces turicensis
883100.3	Delftia acidovorans CCUG 15835	Bacteria	Proteobacteria	Betaproteobacteria	Burkholderiales	Comamonadaceae	Delftia	Delftia acidovorans
883101.3	Delftia acidovorans CCUG 274B	Bacteria	Proteobacteria	Betaproteobacteria	Burkholderiales	Comamonadaceae	Delftia	Delftia acidovorans
883109.3	Eubacterium infirmum F0142	Bacteria	Firmicutes	Clostridia	Clostridiales	Clostridiales Family XIII. Incertae Sedis	-	[Eubacterium] infirmum
883117.3	Klebsiella oxytoca 10-5242	Bacteria	Proteobacteria	Gammaproteobacteria	Enterobacterales	Enterobacteriaceae	Klebsiella	Klebsiella oxytoca
883118.3	Klebsiella oxytoca 10-5243	Bacteria	Proteobacteria	Gammaproteobacteria	Enterobacterales	Enterobacteriaceae	Klebsiella	Klebsiella oxytoca
883120.3	Klebsiella oxytoca 10-5245	Bacteria	Proteobacteria	Gammaproteobacteria	Enterobacterales	Enterobacteriaceae	Klebsiella	Klebsiella oxytoca
883121.3	Klebsiella oxytoca 10-5246	Bacteria	Proteobacteria	Gammaproteobacteria	Enterobacterales	Enterobacteriaceae	Raoultella	Raoultella ornithinolytica
883123.3	Klebsiella oxytoca 10-5248	Bacteria	Proteobacteria	Gammaproteobacteria	Enterobacterales	Enterobacteriaceae	Klebsiella	Klebsiella oxytoca
883125.3	Klebsiella oxytoca 10-5250	Bacteria	Proteobacteria	Gammaproteobacteria	Enterobacterales	Enterobacteriaceae	Klebsiella	Klebsiella oxytoca
883130.3	Staphylococcus epidermidis BVS058A4	Bacteria	Firmicutes	Bacilli	Bacillales	Staphylococcaceae	Staphylococcus	Staphylococcus epidermidis
883150.3	Myroides odoratimimus CCUG 10230	Bacteria	Bacteroidetes	Flavobacteriia	Flavobacteriales	Flavobacteriaceae	Myroides	Myroides odoratimimus
883151.3	Myroides odoratimimus CCUG 12700	Bacteria	Bacteroidetes	Flavobacteriia	Flavobacteriales	Flavobacteriaceae	Myroides	Myroides odoratimimus
883152.3	Myroides odoratimimus CCUG 12901	Bacteria	Bacteroidetes	Flavobacteriia	Flavobacteriales	Flavobacteriaceae	Myroides	Myroides odoratimimus
883153.3	Myroides odoratimimus CCUG 3837	Bacteria	Bacteroidetes	Flavobacteriia	Flavobacteriales	Flavobacteriaceae	Myroides	Myroides odoratimimus
883154.3	Myroides odoratimimus CIP 101113	Bacteria	Bacteroidetes	Flavobacteriia	Flavobacteriales	Flavobacteriaceae	Myroides	Myroides odoratimimus
883156.3	Veillonella ratti ACS-216-V-Col6b	Bacteria	Firmicutes	Negativicutes	Veillonellales	Veillonellaceae	Veillonella	Veillonella seminalis
883162.3	Enterococcus durans FB129-CNAB-4	Bacteria	Firmicutes	Bacilli	Lactobacillales	Enterococcaceae	Enterococcus	Enterococcus faecium
883164.3	Staphylococcus lugdunensis ACS-027-V-Sch2	Bacteria	Firmicutes	Bacilli	Bacillales	Staphylococcaceae	Staphylococcus	Staphylococcus lugdunensis
883165.3	Campylobacter ureolyticus ACS-301-V-Sch3b	Bacteria	Proteobacteria	Epsilonproteobacteria	Campylobacterales	Campylobacteraceae	Campylobacter	Campylobacter ureolyticus
883166.5	Staphylococcus simulans ACS-120-V-Sch1	Bacteria	Firmicutes	Bacilli	Bacillales	Staphylococcaceae	Staphylococcus	Staphylococcus simulans
883167.4	Streptococcus intermedius F0413	Bacteria	Firmicutes	Bacilli	Lactobacillales	Streptococcaceae	Streptococcus	Streptococcus intermedius
885275.3	Escherichia coli str. 'clone D i14'	Bacteria	Proteobacteria	Gammaproteobacteria	Enterobacterales	Enterobacteriaceae	Escherichia	Escherichia coli
885276.3	Escherichia coli str. 'clone D i2'	Bacteria	Proteobacteria	Gammaproteobacteria	Enterobacterales	Enterobacteriaceae	Escherichia	Escherichia coli
887325.3	Eubacterium saburreum DSM 3986	Bacteria	Firmicutes	Clostridia	Clostridiales	Lachnospiraceae	Lachnoanaerobaculum	Lachnoanaerobaculum saburreum
887326.3	Mobiluncus curtisii ATCC 51333	Bacteria	Actinobacteria	Actinobacteria	Actinomycetales	Actinomycetaceae	Mobiluncus	Mobiluncus curtisii
887898.3	Lautropia mirabilis ATCC 51599	Bacteria	Proteobacteria	Betaproteobacteria	Burkholderiales	Burkholderiaceae	Lautropia	Lautropia mirabilis
887899.3	Mobiluncus curtisii subsp. holmesii ATCC 35242	Bacteria	Actinobacteria	Actinobacteria	Actinomycetales	Actinomycetaceae	Mobiluncus	Mobiluncus curtisii
888048.3	Streptococcus parasanguinis ATCC 903	Bacteria	Firmicutes	Bacilli	Lactobacillales	Streptococcaceae	Streptococcus	Streptococcus parasanguinis
888049.3	Streptococcus sanguinis ATCC 49296	Bacteria	Firmicutes	Bacilli	Lactobacillales	Streptococcaceae	Streptococcus	Streptococcus oralis
888059.3	Capnocytophaga sp. oral taxon 338 str. F0234	Bacteria	Bacteroidetes	Flavobacteriia	Flavobacteriales	Flavobacteriaceae	Capnocytophaga	-
888063.3	Enterobacter hormaechei ATCC 49162	Bacteria	Proteobacteria	Gammaproteobacteria	Enterobacterales	Enterobacteriaceae	Enterobacter	Enterobacter cloacae complex
888066.3	Enterococcus casseliflavus ATCC 12755	Bacteria	Firmicutes	Bacilli	Lactobacillales	Enterococcaceae	Enterococcus	Enterococcus casseliflavus
888728.3	Haemophilus aegyptius ATCC 11116	Bacteria	Proteobacteria	Gammaproteobacteria	Pasteurellales	Pasteurellaceae	Haemophilus	Haemophilus aegyptius
888746.3	Streptococcus peroris ATCC 700780	Bacteria	Firmicutes	Bacilli	Lactobacillales	Streptococcaceae	Streptococcus	Streptococcus peroris
888801.3	Lactobacillus iners ATCC 55195	Bacteria	Firmicutes	Bacilli	Lactobacillales	Lactobacillaceae	Lactobacillus	Lactobacillus iners
888807.3	Streptococcus sanguinis SK1	Bacteria	Firmicutes	Bacilli	Lactobacillales	Streptococcaceae	Streptococcus	Streptococcus sanguinis
888808.3	Streptococcus sanguinis SK49	Bacteria	Firmicutes	Bacilli	Lactobacillales	Streptococcaceae	Streptococcus	Streptococcus sanguinis
888809.3	Streptococcus sanguinis SK72	Bacteria	Firmicutes	Bacilli	Lactobacillales	Streptococcaceae	Streptococcus	Streptococcus sanguinis
888810.3	Streptococcus sanguinis SK115	Bacteria	Firmicutes	Bacilli	Lactobacillales	Streptococcaceae	Streptococcus	Streptococcus sanguinis
888811.3	Streptococcus sanguinis SK150	Bacteria	Firmicutes	Bacilli	Lactobacillales	Streptococcaceae	Streptococcus	Streptococcus sanguinis
888812.3	Streptococcus sanguinis SK160	Bacteria	Firmicutes	Bacilli	Lactobacillales	Streptococcaceae	Streptococcus	Streptococcus sanguinis
888813.3	Streptococcus sanguinis SK330	Bacteria	Firmicutes	Bacilli	Lactobacillales	Streptococcaceae	Streptococcus	Streptococcus sanguinis
888814.4	Streptococcus sanguinis SK340	Bacteria	Firmicutes	Bacilli	Lactobacillales	Streptococcaceae	Streptococcus	Streptococcus sanguinis
888815.3	Streptococcus sanguinis SK353	Bacteria	Firmicutes	Bacilli	Lactobacillales	Streptococcaceae	Streptococcus	Streptococcus sanguinis
888816.3	Streptococcus sanguinis SK355	Bacteria	Firmicutes	Bacilli	Lactobacillales	Streptococcaceae	Streptococcus	Streptococcus sanguinis
888817.3	Streptococcus sanguinis SK405	Bacteria	Firmicutes	Bacilli	Lactobacillales	Streptococcaceae	Streptococcus	Streptococcus sanguinis
888818.3	Streptococcus sanguinis SK408	Bacteria	Firmicutes	Bacilli	Lactobacillales	Streptococcaceae	Streptococcus	Streptococcus sanguinis
888819.3	Streptococcus sanguinis SK678	Bacteria	Firmicutes	Bacilli	Lactobacillales	Streptococcaceae	Streptococcus	Streptococcus sanguinis
888820.3	Streptococcus sanguinis SK1056	Bacteria	Firmicutes	Bacilli	Lactobacillales	Streptococcaceae	Streptococcus	Streptococcus sanguinis
888821.3	Streptococcus sanguinis SK1057	Bacteria	Firmicutes	Bacilli	Lactobacillales	Streptococcaceae	Streptococcus	Streptococcus sanguinis
888822.3	Streptococcus sanguinis SK1058	Bacteria	Firmicutes	Bacilli	Lactobacillales	Streptococcaceae	Streptococcus	Streptococcus sanguinis
888823.3	Streptococcus sanguinis SK1059	Bacteria	Firmicutes	Bacilli	Lactobacillales	Streptococcaceae	Streptococcus	Streptococcus sanguinis
888824.3	Streptococcus sanguinis SK1087	Bacteria	Firmicutes	Bacilli	Lactobacillales	Streptococcaceae	Streptococcus	Streptococcus sanguinis
888825.3	Streptococcus sanguinis VMC66	Bacteria	Firmicutes	Bacilli	Lactobacillales	Streptococcaceae	Streptococcus	Streptococcus sanguinis
888826.3	Campylobacter upsaliensis JV21	Bacteria	Proteobacteria	Epsilonproteobacteria	Campylobacterales	Campylobacteraceae	Campylobacter	Campylobacter upsaliensis
888827.3	Arcobacter butzleri JV22	Bacteria	Proteobacteria	Epsilonproteobacteria	Campylobacterales	Campylobacteraceae	Arcobacter	Arcobacter butzleri
888828.3	Haemophilus parainfluenzae ATCC 33392	Bacteria	Proteobacteria	Gammaproteobacteria	Pasteurellales	Pasteurellaceae	Haemophilus	Haemophilus parainfluenzae
888832.3	Prevotella salivae DSM 15606	Bacteria	Bacteroidetes	Bacteroidia	Bacteroidales	Prevotellaceae	Prevotella	Prevotella salivae
888833.3	Streptococcus australis ATCC 700641	Bacteria	Firmicutes	Bacilli	Lactobacillales	Streptococcaceae	Streptococcus	Streptococcus australis
889201.3	Streptococcus cristatus ATCC 51100	Bacteria	Firmicutes	Bacilli	Lactobacillales	Streptococcaceae	Streptococcus	Streptococcus cristatus
889204.3	Streptococcus infantis ATCC 700779	Bacteria	Firmicutes	Bacilli	Lactobacillales	Streptococcaceae	Streptococcus	Streptococcus infantis
889206.3	Streptococcus vestibularis ATCC 49124	Bacteria	Firmicutes	Bacilli	Lactobacillales	Streptococcaceae	Streptococcus	Streptococcus vestibularis
889738.3	Acinetobacter baumannii MDR-TJ	Bacteria	Proteobacteria	Gammaproteobacteria	Pseudomonadales	Moraxellaceae	Acinetobacter	Acinetobacter baumannii
889932.4	Lactobacillus plantarum subsp. plantarum ST-III	Bacteria	Firmicutes	Bacilli	Lactobacillales	Lactobacillaceae	Lactobacillus	Lactobacillus plantarum
890402.3	Bifidobacterium longum subsp. longum BBMN68	Bacteria	Actinobacteria	Actinobacteria	Bifidobacteriales	Bifidobacteriaceae	Bifidobacterium	Bifidobacterium longum
891391.3	Lactobacillus acidophilus 30SC	Bacteria	Firmicutes	Bacilli	Lactobacillales	Lactobacillaceae	Lactobacillus	Lactobacillus acidophilus
903510.3	Vibrio furnissii NCTC 11218	Bacteria	Proteobacteria	Gammaproteobacteria	Vibrionales	Vibrionaceae	Vibrio	Vibrio furnissii
903814.3	Eubacterium limosum KIST612	Bacteria	Firmicutes	Clostridia	Clostridiales	Eubacteriaceae	Eubacterium	Eubacterium limosum
903889.3	Acinetobacter baumannii OIFC137	Bacteria	Proteobacteria	Gammaproteobacteria	Pseudomonadales	Moraxellaceae	Acinetobacter	Acinetobacter baumannii
903893.3	Acinetobacter baumannii OIFC143	Bacteria	Proteobacteria	Gammaproteobacteria	Pseudomonadales	Moraxellaceae	Acinetobacter	Acinetobacter baumannii
903895.3	Acinetobacter baumannii Canada BC-5	Bacteria	Proteobacteria	Gammaproteobacteria	Pseudomonadales	Moraxellaceae	Acinetobacter	Acinetobacter baumannii
903915.3	Acinetobacter baumannii WC-141	Bacteria	Proteobacteria	Gammaproteobacteria	Pseudomonadales	Moraxellaceae	Acinetobacter	-
904306.3	Streptococcus vestibularis F0396	Bacteria	Firmicutes	Bacilli	Lactobacillales	Streptococcaceae	Streptococcus	Streptococcus vestibularis
904314.5	Staphylococcus pettenkoferi VCU012	Bacteria	Firmicutes	Bacilli	Bacillales	Staphylococcaceae	Staphylococcus	Staphylococcus pettenkoferi
904334.4	Staphylococcus capitis VCU116	Bacteria	Firmicutes	Bacilli	Bacillales	Staphylococcaceae	Staphylococcus	Staphylococcus capitis
904339.3	Staphylococcus hominis VCU122	Bacteria	Firmicutes	Bacilli	Bacillales	Staphylococcaceae	Staphylococcus	Staphylococcus hominis
904346.3	Staphylococcus lugdunensis VCU139	Bacteria	Firmicutes	Bacilli	Bacillales	Staphylococcaceae	Staphylococcus	Staphylococcus lugdunensis
905067.3	Streptococcus parasanguinis F0405	Bacteria	Firmicutes	Bacilli	Lactobacillales	Streptococcaceae	Streptococcus	Streptococcus parasanguinis
908290.3	Methylobacterium mesophilicum SR1.6/6	Bacteria	Proteobacteria	Alphaproteobacteria	Rhizobiales	Methylobacteriaceae	Methylobacterium	Methylobacterium mesophilicum
908337.3	Eremococcus coleocola ACS-139-V-Col8	Bacteria	Firmicutes	Bacilli	Lactobacillales	Aerococcaceae	Eremococcus	Eremococcus coleocola
908338.3	Peptoniphilus harei ACS-146-V-Sch2b	Bacteria	Firmicutes	Tissierellia	Tissierellales	Peptoniphilaceae	Peptoniphilus	Peptoniphilus harei
908339.3	Lactobacillus oris PB013-T2-3	Bacteria	Firmicutes	Bacilli	Lactobacillales	Lactobacillaceae	Lactobacillus	Lactobacillus oris
908340.3	Clostridium sp. HGF2	Bacteria	Firmicutes	Clostridia	Clostridiales	Clostridiaceae	Clostridium	-
908341.3	Paenibacillus sp. HGF5	Bacteria	Firmicutes	Bacilli	Bacillales	Paenibacillaceae	Paenibacillus	-
908612.3	Alistipes sp. HGB5	Bacteria	Bacteroidetes	Bacteroidia	Bacteroidales	Rikenellaceae	Alistipes	-
908809.3	Caloramator mitchellensis strain VF08	Bacteria	Firmicutes	Clostridia	Clostridiales	Clostridiaceae	Caloramator	Caloramator mitchellensis
909952.3	Propionibacterium acnes 266	Bacteria	Actinobacteria	Actinobacteria	Propionibacteriales	Propionibacteriaceae	Cutibacterium	Cutibacterium acnes
909954.3	Lactobacillus johnsonii DPC 6026	Bacteria	Firmicutes	Bacilli	Lactobacillales	Lactobacillaceae	Lactobacillus	Lactobacillus johnsonii
910310.3	Turicibacter sp. HGF1	Bacteria	Firmicutes	Erysipelotrichia	Erysipelotrichales	Erysipelotrichaceae	Turicibacter	-
910311.3	Eggerthella sp. HGA1	Bacteria	Actinobacteria	Coriobacteriia	Eggerthellales	Eggerthellaceae	Eggerthella	-
910312.3	Porphyromonas asaccharolytica PR426713P-I	Bacteria	Bacteroidetes	Bacteroidia	Bacteroidales	Porphyromonadaceae	Porphyromonas	Porphyromonas asaccharolytica
910348.4	Escherichia coli P12b	Bacteria	Proteobacteria	Gammaproteobacteria	Enterobacterales	Enterobacteriaceae	Escherichia	Escherichia coli
910954.3	Dietzia cinnamea P4	Bacteria	Actinobacteria	Actinobacteria	Corynebacteriales	Dietziaceae	Dietzia	Dietzia cinnamea
911104.3	Weissella cibaria KACC 11862	Bacteria	Firmicutes	Bacilli	Lactobacillales	Leuconostocaceae	Weissella	Weissella cibaria
911598.3	Bifidobacterium animalis subsp. lactis BS 01	Bacteria	Actinobacteria	Actinobacteria	Bifidobacteriales	Bifidobacteriaceae	Bifidobacterium	Bifidobacterium animalis
913848.6	Lactobacillus coryniformis subsp. coryniformis KCTC 3167 = DSM 20001	Bacteria	Firmicutes	Bacilli	Lactobacillales	Lactobacillaceae	Lactobacillus	Lactobacillus coryniformis
927665.4	Parabacteroides goldsteinii DSM 19448 = WAL 12034	Bacteria	Bacteroidetes	Bacteroidia	Bacteroidales	Tannerellaceae	Parabacteroides	Parabacteroides goldsteinii
927666.3	Streptococcus oralis Uo5	Bacteria	Firmicutes	Bacilli	Lactobacillales	Streptococcaceae	Streptococcus	Streptococcus oralis
927691.3	Leuconostoc gelidum KCTC 3527	Bacteria	Firmicutes	Bacilli	Lactobacillales	Leuconostocaceae	Leuconostoc	Leuconostoc gelidum
928327.3	Lactobacillus iners UPII 143-D	Bacteria	Firmicutes	Bacilli	Lactobacillales	Lactobacillaceae	Lactobacillus	Lactobacillus iners
928328.3	Lactobacillus iners UPII 60-B	Bacteria	Firmicutes	Bacilli	Lactobacillales	Lactobacillaceae	Lactobacillus	Lactobacillus iners
929102.3	Lactococcus lactis subsp. lactis CV56	Bacteria	Firmicutes	Bacilli	Lactobacillales	Streptococcaceae	Lactococcus	Lactococcus lactis
929793.3	Campylobacter concisus UNSWCD	Bacteria	Proteobacteria	Epsilonproteobacteria	Campylobacterales	Campylobacteraceae	Campylobacter	Campylobacter concisus
930170.3	Bacillus thuringiensis serovar finitimus YBT-020	Bacteria	Firmicutes	Bacilli	Bacillales	Bacillaceae	Bacillus	Bacillus thuringiensis
930942.3	Lactobacillus animalis KCTC 3501	Bacteria	Firmicutes	Bacilli	Lactobacillales	Lactobacillaceae	Lactobacillus	Lactobacillus animalis
930944.6	Yersinia enterocolitica subsp. palearctica Y11	Bacteria	Proteobacteria	Gammaproteobacteria	Enterobacterales	Yersiniaceae	Yersinia	Yersinia enterocolitica
931276.5	Clostridium saccharoperbutylacetonicum N1-4(HMT)	Bacteria	Firmicutes	Clostridia	Clostridiales	Clostridiaceae	Clostridium	Clostridium saccharoperbutylacetonicum
931281.3	Pseudomonas putida BIRD-1	Bacteria	Proteobacteria	Gammaproteobacteria	Pseudomonadales	Pseudomonadaceae	Pseudomonas	Pseudomonas putida
935296.3	Enterobacter aerogenes EA1509E	Bacteria	Proteobacteria	Gammaproteobacteria	Enterobacterales	Enterobacteriaceae	Klebsiella	Klebsiella aerogenes
935546.3	Mesorhizobium loti NZP2037	Bacteria	Proteobacteria	Alphaproteobacteria	Rhizobiales	Phyllobacteriaceae	Mesorhizobium	Mesorhizobium loti
935839.3	Cellulosimicrobium cellulans J36	Bacteria	Actinobacteria	Actinobacteria	Micrococcales	Promicromonosporaceae	Cellulosimicrobium	Cellulosimicrobium cellulans
935897.3	Haemophilus influenzae F3047	Bacteria	Proteobacteria	Gammaproteobacteria	Pasteurellales	Pasteurellaceae	Haemophilus	Haemophilus influenzae
936047.3	Propionibacterium sp. 409-HC1	Bacteria	Actinobacteria	Actinobacteria	Propionibacteriales	Propionibacteriaceae	Propionibacterium	-
936140.3	Lactobacillus farciminis KCTC 3681	Bacteria	Firmicutes	Bacilli	Lactobacillales	Lactobacillaceae	Lactobacillus	Lactobacillus farciminis
936153.3	Enterococcus faecalis 62	Bacteria	Firmicutes	Bacilli	Lactobacillales	Enterococcaceae	Enterococcus	Enterococcus faecalis
936154.3	Streptococcus parauberis KCTC 11537	Bacteria	Firmicutes	Bacilli	Lactobacillales	Streptococcaceae	Streptococcus	Streptococcus parauberis
936156.3	Bacillus subtilis BSn5	Bacteria	Firmicutes	Bacilli	Bacillales	Bacillaceae	Bacillus	Bacillus subtilis
936370.3	Capnocytophaga sp. CM59	Bacteria	Bacteroidetes	Flavobacteriia	Flavobacteriales	Flavobacteriaceae	Capnocytophaga	-
936565.3	Klebsiella sp. OBRC7	Bacteria	Proteobacteria	Gammaproteobacteria	Enterobacterales	Enterobacteriaceae	Klebsiella	-
936588.3	Veillonella sp. ACP1	Bacteria	Firmicutes	Negativicutes	Veillonellales	Veillonellaceae	Veillonella	-
936594.3	Lachnospiraceae bacterium ICM7	Bacteria	Firmicutes	Clostridia	Clostridiales	Lachnospiraceae	Lachnoanaerobaculum	-
938293.3	Anaerococcus sp. 9402080	Bacteria	Firmicutes	Tissierellia	Tissierellales	Peptoniphilaceae	Anaerococcus	Anaerococcus provencensis
938294.3	Anaerococcus sp. 9403502	Bacteria	Firmicutes	Tissierellia	Tissierellales	Peptoniphilaceae	Anaerococcus	Anaerococcus pacaensis
940287.3	Yersinia enterocolitica subsp. palearctica 556/8265	Bacteria	Proteobacteria	Gammaproteobacteria	Enterobacterales	Yersiniaceae	Yersinia	Yersinia enterocolitica
941770.3	Lactobacillus fructivorans KCTC 3543	Bacteria	Firmicutes	Bacilli	Lactobacillales	Lactobacillaceae	Lactobacillus	Lactobacillus fructivorans
941968.4	Clostridium botulinum H04402 065	Bacteria	Firmicutes	Clostridia	Clostridiales	Clostridiaceae	Clostridium	Clostridium botulinum
944557.3	Prevotella denticola CRIS 18C-A	Bacteria	Bacteroidetes	Bacteroidia	Bacteroidales	Prevotellaceae	Prevotella	Prevotella denticola
944559.3	Paenibacillus sp. HGF7	Bacteria	Firmicutes	Bacilli	Bacillales	Paenibacillaceae	Paenibacillus	-
944562.4	Lactobacillus oris F0423	Bacteria	Firmicutes	Bacilli	Lactobacillales	Lactobacillaceae	Lactobacillus	Lactobacillus oris
944564.4	Veillonella sp. oral taxon 780 str. F0422	Bacteria	Firmicutes	Negativicutes	Veillonellales	Veillonellaceae	Veillonella	-
945711.3	Corynebacterium ulcerans 809	Bacteria	Actinobacteria	Actinobacteria	Corynebacteriales	Corynebacteriaceae	Corynebacterium	Corynebacterium ulcerans
945712.3	Corynebacterium ulcerans BR-AD22	Bacteria	Actinobacteria	Actinobacteria	Corynebacteriales	Corynebacteriaceae	Corynebacterium	Corynebacterium ulcerans
946034.3	Salmonella enterica subsp. enterica serovar Typhimurium str.	Bacteria	Proteobacteria	Gammaproteobacteria	Enterobacterales	Enterobacteriaceae	Salmonella	Salmonella enterica
946235.3	Oceanobacillus sp. Ndiop	Bacteria	Firmicutes	Bacilli	Bacillales	Bacillaceae	Oceanobacillus	Oceanobacillus massiliensis
956149.6	Cronobacter sakazakii SP291	Bacteria	Proteobacteria	Gammaproteobacteria	Enterobacterales	Enterobacteriaceae	Cronobacter	Cronobacter sakazakii
979199.3	Staphylococcus epidermidis NIHLM095	Bacteria	Firmicutes	Bacilli	Bacillales	Staphylococcaceae	Staphylococcus	Staphylococcus epidermidis
979200.3	Staphylococcus epidermidis NIHLM088	Bacteria	Firmicutes	Bacilli	Bacillales	Staphylococcaceae	Staphylococcus	Staphylococcus epidermidis
979201.3	Staphylococcus epidermidis NIHLM087	Bacteria	Firmicutes	Bacilli	Bacillales	Staphylococcaceae	Staphylococcus	Staphylococcus epidermidis
979202.3	Staphylococcus epidermidis NIHLM070	Bacteria	Firmicutes	Bacilli	Bacillales	Staphylococcaceae	Staphylococcus	Staphylococcus epidermidis
979203.3	Staphylococcus epidermidis NIHLM067	Bacteria	Firmicutes	Bacilli	Bacillales	Staphylococcaceae	Staphylococcus	Staphylococcus epidermidis
979204.3	Staphylococcus epidermidis NIHLM061	Bacteria	Firmicutes	Bacilli	Bacillales	Staphylococcaceae	Staphylococcus	Staphylococcus epidermidis
979205.3	Staphylococcus epidermidis NIHLM057	Bacteria	Firmicutes	Bacilli	Bacillales	Staphylococcaceae	Staphylococcus	Staphylococcus epidermidis
979207.3	Staphylococcus epidermidis NIHLM049	Bacteria	Firmicutes	Bacilli	Bacillales	Staphylococcaceae	Staphylococcus	Staphylococcus epidermidis
979208.3	Staphylococcus epidermidis NIHLM040	Bacteria	Firmicutes	Bacilli	Bacillales	Staphylococcaceae	Staphylococcus	Staphylococcus epidermidis
979209.3	Staphylococcus epidermidis NIHLM039	Bacteria	Firmicutes	Bacilli	Bacillales	Staphylococcaceae	Staphylococcus	Staphylococcus epidermidis
979210.3	Staphylococcus epidermidis NIHLM037	Bacteria	Firmicutes	Bacilli	Bacillales	Staphylococcaceae	Staphylococcus	Staphylococcus epidermidis
979211.3	Staphylococcus epidermidis NIHLM023	Bacteria	Firmicutes	Bacilli	Bacillales	Staphylococcaceae	Staphylococcus	Staphylococcus epidermidis
979212.3	Staphylococcus epidermidis NIHLM021	Bacteria	Firmicutes	Bacilli	Bacillales	Staphylococcaceae	Staphylococcus	Staphylococcus epidermidis
979213.3	Staphylococcus epidermidis NIHLM020	Bacteria	Firmicutes	Bacilli	Bacillales	Staphylococcaceae	Staphylococcus	Staphylococcus epidermidis
979214.3	Staphylococcus epidermidis NIHLM031	Bacteria	Firmicutes	Bacilli	Bacillales	Staphylococcaceae	Staphylococcus	Staphylococcus epidermidis
979215.3	Staphylococcus epidermidis NIHLM018	Bacteria	Firmicutes	Bacilli	Bacillales	Staphylococcaceae	Staphylococcus	Staphylococcus epidermidis
979216.3	Staphylococcus epidermidis NIHLM015	Bacteria	Firmicutes	Bacilli	Bacillales	Staphylococcaceae	Staphylococcus	Staphylococcus epidermidis
979217.3	Staphylococcus epidermidis NIHLM008	Bacteria	Firmicutes	Bacilli	Bacillales	Staphylococcaceae	Staphylococcus	Staphylococcus epidermidis
979218.3	Staphylococcus epidermidis NIHLM003	Bacteria	Firmicutes	Bacilli	Bacillales	Staphylococcaceae	Staphylococcus	Staphylococcus epidermidis
979219.3	Staphylococcus epidermidis NIHLM001	Bacteria	Firmicutes	Bacilli	Bacillales	Staphylococcaceae	Staphylococcus	Staphylococcus epidermidis
979220.3	Staphylococcus epidermidis NIH05005	Bacteria	Firmicutes	Bacilli	Bacillales	Staphylococcaceae	Staphylococcus	Staphylococcus epidermidis
979221.3	Staphylococcus epidermidis NIH05001	Bacteria	Firmicutes	Bacilli	Bacillales	Staphylococcaceae	Staphylococcus	Staphylococcus epidermidis
979222.3	Staphylococcus epidermidis NIH04008	Bacteria	Firmicutes	Bacilli	Bacillales	Staphylococcaceae	Staphylococcus	Staphylococcus epidermidis
980514.3	Acinetobacter baumannii TCDC-AB0715	Bacteria	Proteobacteria	Gammaproteobacteria	Pseudomonadales	Moraxellaceae	Acinetobacter	Acinetobacter baumannii
981331.5	Acinetobacter calcoaceticus DSM 30006 = CIP 81.8	Bacteria	Proteobacteria	Gammaproteobacteria	Pseudomonadales	Moraxellaceae	Acinetobacter	Acinetobacter calcoaceticus
981334.6	Acinetobacter radioresistens DSM 6976 = NBRC 102413 = CIP 103788	Bacteria	Proteobacteria	Gammaproteobacteria	Pseudomonadales	Moraxellaceae	Acinetobacter	Acinetobacter radioresistens
981367.3	Escherichia fergusonii ECD227	Bacteria	Proteobacteria	Gammaproteobacteria	Enterobacterales	Enterobacteriaceae	Escherichia	Escherichia fergusonii
981539.3	Streptococcus gallolyticus subsp. gallolyticus ATCC 43143	Bacteria	Firmicutes	Bacilli	Lactobacillales	Streptococcaceae	Streptococcus	Streptococcus gallolyticus
981540.3	Streptococcus pasteurianus ATCC 43144	Bacteria	Firmicutes	Bacilli	Lactobacillales	Streptococcaceae	Streptococcus	Streptococcus pasteurianus
983328.4	Campylobacter fetus subsp. venerealis NCTC 10354	Bacteria	Proteobacteria	Epsilonproteobacteria	Campylobacterales	Campylobacteraceae	Campylobacter	Campylobacter fetus
985002.3	Staphylococcus aureus subsp. aureus MSHR1132	Bacteria	Firmicutes	Bacilli	Bacillales	Staphylococcaceae	Staphylococcus	Staphylococcus argenteus
985006.4	Staphylococcus aureus subsp. aureus LGA251	Bacteria	Firmicutes	Bacilli	Bacillales	Staphylococcaceae	Staphylococcus	Staphylococcus aureus
985008.3	Aggregatibacter aphrophilus ATCC 33389	Bacteria	Proteobacteria	Gammaproteobacteria	Pasteurellales	Pasteurellaceae	Aggregatibacter	Aggregatibacter aphrophilus
985081.3	Helicobacter pylori 2017	Bacteria	Proteobacteria	Epsilonproteobacteria	Campylobacterales	Helicobacteraceae	Helicobacter	Helicobacter pylori
990282.4	Salmonella enterica subsp. enterica serovar Typhimurium str. UK-1	Bacteria	Proteobacteria	Gammaproteobacteria	Enterobacterales	Enterobacteriaceae	Salmonella	Salmonella enterica
990317.3	Streptococcus gallolyticus subsp. gallolyticus ATCC BAA-2069	Bacteria	Firmicutes	Bacilli	Lactobacillales	Streptococcaceae	Streptococcus	Streptococcus gallolyticus
991789.4	[Clostridium] propionicum DSM 1682	Bacteria	Firmicutes	Clostridia	Clostridiales	Lachnospiraceae	Anaerotignum	Anaerotignum propionicum
992119.3	Helicobacter pylori Hp M3	Bacteria	Proteobacteria	Epsilonproteobacteria	Campylobacterales	Helicobacteraceae	Helicobacter	Helicobacter pylori
994476.3	Yersinia enterocolitica subsp. palearctica 105.5R(r)	Bacteria	Proteobacteria	Gammaproteobacteria	Enterobacterales	Yersiniaceae	Yersinia	Yersinia enterocolitica
996285.3	Pseudomonas stutzeri DSM 4166	Bacteria	Proteobacteria	Gammaproteobacteria	Pseudomonadales	Pseudomonadaceae	Pseudomonas	Pseudomonas stutzeri
996640.3	Paenibacillus sp. ICGEB2008	Bacteria	Firmicutes	Bacilli	Bacillales	Paenibacillaceae	Paenibacillus	-
997346.3	Desmospora sp. 8437	Bacteria	Firmicutes	Bacilli	Bacillales	Thermoactinomycetaceae	Desmospora	-
997348.4	Neisseria macacae ATCC 33926	Bacteria	Proteobacteria	Betaproteobacteria	Neisseriales	Neisseriaceae	Neisseria	Neisseria macacae
997350.3	Peptoniphilus indolicus ATCC 29427	Bacteria	Firmicutes	Tissierellia	Tissierellales	Peptoniphilaceae	Peptoniphilus	Peptoniphilus indolicus
997352.4	Prevotella nigrescens ATCC 33563	Bacteria	Bacteroidetes	Bacteroidia	Bacteroidales	Prevotellaceae	Prevotella	Prevotella nigrescens
997353.4	Prevotella pallens ATCC 700821	Bacteria	Bacteroidetes	Bacteroidia	Bacteroidales	Prevotellaceae	Prevotella	Prevotella pallens
997356.4	Streptococcus sanguinis ATCC 29667	Bacteria	Firmicutes	Bacilli	Lactobacillales	Streptococcaceae	Streptococcus	Streptococcus sanguinis
997827.4	Clostridium difficile 002-P50-2011	Bacteria	Firmicutes	Clostridia	Clostridiales	Peptostreptococcaceae	Clostridioides	Clostridioides difficile
997828.4	Clostridium difficile 050-P50-2011	Bacteria	Firmicutes	Clostridia	Clostridiales	Peptostreptococcaceae	Clostridioides	Clostridioides difficile
997830.4	Streptococcus infantis X	Bacteria	Firmicutes	Bacilli	Lactobacillales	Streptococcaceae	Streptococcus	Streptococcus infantis
997872.3	Atopobium minutum 10063974	Bacteria	Actinobacteria	Coriobacteriia	Coriobacteriales	Atopobiaceae	Atopobium	Atopobium minutum
997873.3	Bacteroides caccae CL03T12C61	Bacteria	Bacteroidetes	Bacteroidia	Bacteroidales	Bacteroidaceae	Bacteroides	Bacteroides caccae
997874.3	Bacteroides cellulosilyticus CL02T12C19	Bacteria	Bacteroidetes	Bacteroidia	Bacteroidales	Bacteroidaceae	Bacteroides	Bacteroides cellulosilyticus
997875.3	Bacteroides dorei CL02T00C15	Bacteria	Bacteroidetes	Bacteroidia	Bacteroidales	Bacteroidaceae	Bacteroides	Bacteroides dorei
997876.3	Bacteroides dorei CL02T12C06	Bacteria	Bacteroidetes	Bacteroidia	Bacteroidales	Bacteroidaceae	Bacteroides	Bacteroides dorei
997877.3	Bacteroides dorei CL03T12C01	Bacteria	Bacteroidetes	Bacteroidia	Bacteroidales	Bacteroidaceae	Bacteroides	Bacteroides dorei
997880.3	Bacteroides fragilis CL05T00C42	Bacteria	Bacteroidetes	Bacteroidia	Bacteroidales	Bacteroidaceae	Bacteroides	Bacteroides fragilis
997884.3	Bacteroides nordii CL02T12C05	Bacteria	Bacteroidetes	Bacteroidia	Bacteroidales	Bacteroidaceae	Bacteroides	Bacteroides nordii
997885.3	Bacteroides ovatus CL02T12C04	Bacteria	Bacteroidetes	Bacteroidia	Bacteroidales	Bacteroidaceae	Bacteroides	Bacteroides ovatus
997886.3	Bacteroides ovatus CL03T12C18	Bacteria	Bacteroidetes	Bacteroidia	Bacteroidales	Bacteroidaceae	Bacteroides	Bacteroides ovatus
997887.3	Bacteroides salyersiae CL02T12C01	Bacteria	Bacteroidetes	Bacteroidia	Bacteroidales	Bacteroidaceae	Bacteroides	Bacteroides salyersiae
997888.3	Bacteroides thetaiotaomicron CL09T03C10	Bacteria	Bacteroidetes	Bacteroidia	Bacteroidales	Bacteroidaceae	Bacteroides	Bacteroides finegoldii
997889.3	Bacteroides uniformis CL03T00C23	Bacteria	Bacteroidetes	Bacteroidia	Bacteroidales	Bacteroidaceae	Bacteroides	Bacteroides uniformis
997890.3	Bacteroides uniformis CL03T12C37	Bacteria	Bacteroidetes	Bacteroidia	Bacteroidales	Bacteroidaceae	Bacteroides	Bacteroides uniformis
997891.3	Bacteroides vulgatus CL09T03C04	Bacteria	Bacteroidetes	Bacteroidia	Bacteroidales	Bacteroidaceae	Bacteroides	Bacteroides vulgatus
997892.3	Bacteroides xylanisolvens CL03T12C04	Bacteria	Bacteroidetes	Bacteroidia	Bacteroidales	Bacteroidaceae	Bacteroides	Bacteroides xylanisolvens
997893.5	Clostridium bolteae 90A5	Bacteria	Firmicutes	Clostridia	Clostridiales	Lachnospiraceae	Lachnoclostridium	[Clostridium] bolteae
997894.4	Clostridium bolteae 90A9	Bacteria	Firmicutes	Clostridia	Clostridiales	Lachnospiraceae	Lachnoclostridium	[Clostridium] bolteae
997895.4	Clostridium bolteae 90B3	Bacteria	Firmicutes	Clostridia	Clostridiales	Lachnospiraceae	Lachnoclostridium	[Clostridium] bolteae
997896.4	Clostridium bolteae 90B7	Bacteria	Firmicutes	Clostridia	Clostridiales	Lachnospiraceae	Lachnoclostridium	[Clostridium] bolteae
997897.5	Clostridium bolteae 90B8	Bacteria	Firmicutes	Clostridia	Clostridiales	Lachnospiraceae	Lachnoclostridium	[Clostridium] bolteae
997898.4	Clostridium butyricum 60E.3	Bacteria	Firmicutes	Clostridia	Clostridiales	Clostridiaceae	Clostridium	Clostridium butyricum
998088.4	Aeromonas veronii B565	Bacteria	Proteobacteria	Gammaproteobacteria	Aeromonadales	Aeromonadaceae	Aeromonas	Aeromonas veronii
998820.3	Lactobacillus casei BD-II	Bacteria	Firmicutes	Bacilli	Lactobacillales	Lactobacillaceae	Lactobacillus	Lactobacillus casei
999378.3	Lactobacillus casei LC2W	Bacteria	Firmicutes	Bacilli	Lactobacillales	Lactobacillaceae	Lactobacillus	Lactobacillus casei
999403.4	Clostridium clostridioforme 90A1	Bacteria	Firmicutes	Clostridia	Clostridiales	Lachnospiraceae	Lachnoclostridium	[Clostridium] clostridioforme
999404.4	Clostridium clostridioforme 90A3	Bacteria	Firmicutes	Clostridia	Clostridiales	Lachnospiraceae	Lachnoclostridium	[Clostridium] clostridioforme
999405.4	Clostridium clostridioforme 90A4	Bacteria	Firmicutes	Clostridia	Clostridiales	Lachnospiraceae	Lachnoclostridium	[Clostridium] clostridioforme
999406.3	Clostridium clostridioforme 90A6	Bacteria	Firmicutes	Clostridia	Clostridiales	Lachnospiraceae	Lachnoclostridium	[Clostridium] clostridioforme
999407.4	Clostridium clostridioforme 90A7	Bacteria	Firmicutes	Clostridia	Clostridiales	Lachnospiraceae	Lachnoclostridium	[Clostridium] clostridioforme
999408.3	Clostridium clostridioforme 90A8	Bacteria	Firmicutes	Clostridia	Clostridiales	Lachnospiraceae	Lachnoclostridium	[Clostridium] clostridioforme
999409.3	Clostridium clostridioforme 90B1	Bacteria	Firmicutes	Clostridia	Clostridiales	Lachnospiraceae	Lachnoclostridium	[Clostridium] clostridioforme
999410.3	Clostridium clostridioforme CM201	Bacteria	Firmicutes	Clostridia	Clostridiales	Lachnospiraceae	Lachnoclostridium	[Clostridium] clostridioforme
999412.4	Clostridium hathewayi 12489931	Bacteria	Firmicutes	Clostridia	Clostridiales	Clostridiaceae	Hungatella	Hungatella hathewayi
999413.4	Clostridium innocuum 2959	Bacteria	Firmicutes	Erysipelotrichia	Erysipelotrichales	Erysipelotrichaceae	Erysipelatoclostridium	[Clostridium] innocuum
999414.3	Fusobacterium nucleatum subsp. animalis OT 420	Bacteria	Fusobacteria	Fusobacteriia	Fusobacteriales	Fusobacteriaceae	Fusobacterium	Fusobacterium nucleatum
999415.3	Eggerthia catenaformis OT 569 = DSM 20559	Bacteria	Firmicutes	Erysipelotrichia	Erysipelotrichales	Erysipelotrichaceae	Eggerthia	Eggerthia catenaformis
999416.3	Parabacteroides distasonis CL03T12C09	Bacteria	Bacteroidetes	Bacteroidia	Bacteroidales	Tannerellaceae	Parabacteroides	Parabacteroides distasonis
999417.3	Parabacteroides distasonis CL09T03C24	Bacteria	Bacteroidetes	Bacteroidia	Bacteroidales	Tannerellaceae	Parabacteroides	Parabacteroides distasonis
999418.3	Parabacteroides goldsteinii CL02T12C30	Bacteria	Bacteroidetes	Bacteroidia	Bacteroidales	Tannerellaceae	Parabacteroides	Parabacteroides goldsteinii
999419.3	Parabacteroides johnsonii CL02T12C29	Bacteria	Bacteroidetes	Bacteroidia	Bacteroidales	Tannerellaceae	Parabacteroides	Parabacteroides johnsonii
999420.3	Parabacteroides merdae CL03T12C32	Bacteria	Bacteroidetes	Bacteroidia	Bacteroidales	Tannerellaceae	Parabacteroides	Parabacteroides merdae
999421.3	Parabacteroides merdae CL09T00C40	Bacteria	Bacteroidetes	Bacteroidia	Bacteroidales	Tannerellaceae	Parabacteroides	Parabacteroides merdae
999423.3	Selenomonas sp. F0473	Bacteria	Firmicutes	Negativicutes	Selenomonadales	Selenomonadaceae	Selenomonas	-
999628.3	Methyloversatilis universalis EHg5	Bacteria	Proteobacteria	Betaproteobacteria	Nitrosomonadales	Sterolibacteriaceae	Methyloversatilis	Methyloversatilis universalis
999891.3	Bacillus amyloliquefaciens TA208	Bacteria	Firmicutes	Bacilli	Bacillales	Bacillaceae	Bacillus	Bacillus amyloliquefaciens
1000565.3	Methyloversatilis universalis FAM5	Bacteria	Proteobacteria	Betaproteobacteria	Nitrosomonadales	Sterolibacteriaceae	Methyloversatilis	Methyloversatilis universalis
1000570.3	Streptococcus anginosus SK52	Bacteria	Firmicutes	Bacilli	Lactobacillales	Streptococcaceae	Streptococcus	Streptococcus anginosus
1000590.6	Staphylococcus epidermidis 14.1.R1.SE	Bacteria	Firmicutes	Bacilli	Bacillales	Staphylococcaceae	Staphylococcus	Staphylococcus epidermidis
1001582.3	Bacillus amyloliquefaciens LL3	Bacteria	Firmicutes	Bacilli	Bacillales	Bacillaceae	Bacillus	Bacillus amyloliquefaciens
1001583.3	Lactobacillus brevis KB290	Bacteria	Firmicutes	Bacilli	Lactobacillales	Lactobacillaceae	Lactobacillus	Lactobacillus brevis
1001725.3	Mycobacterium abscessus 4S-0116-R	Bacteria	Actinobacteria	Actinobacteria	Corynebacteriales	Mycobacteriaceae	Mycobacterium	Mycobacterium abscessus
1001740.3	Mycobacterium abscessus 6G-0125-R	Bacteria	Actinobacteria	Actinobacteria	Corynebacteriales	Mycobacteriaceae	Mycobacterium	Mycobacterium abscessus
1002364.3	Hafnia alvei ATCC 51873	Bacteria	Proteobacteria	Gammaproteobacteria	Enterobacterales	Hafniaceae	Hafnia	Hafnia alvei
1002365.5	Lactobacillus rhamnosus ATCC 21052	Bacteria	Firmicutes	Bacilli	Lactobacillales	Lactobacillaceae	Lactobacillus	Lactobacillus rhamnosus
1002366.3	Listeria innocua ATCC 33091	Bacteria	Firmicutes	Bacilli	Bacillales	Listeriaceae	Listeria	Listeria innocua
1002367.3	Prevotella stercorea DSM 18206	Bacteria	Bacteroidetes	Bacteroidia	Bacteroidales	Prevotellaceae	Prevotella	Prevotella stercorea
1002368.3	Yokenella regensburgei ATCC 43003	Bacteria	Proteobacteria	Gammaproteobacteria	Enterobacterales	Enterobacteriaceae	Yokenella	Yokenella regensburgei
1002369.4	Clostridium difficile 70-100-2010	Bacteria	Firmicutes	Clostridia	Clostridiales	Peptostreptococcaceae	Clostridioides	Clostridioides difficile
1005704.3	Streptococcus oralis SK255	Bacteria	Firmicutes	Bacilli	Lactobacillales	Streptococcaceae	Streptococcus	Streptococcus oralis
[truncated: 858 more rows]

## Sheet: Butyrate
Table S1. B. Metabolic subsystem of genes involved in Butyrate synthesis in reference human gut bacterial genomes.
Genome id	Genome name	Genus	Species	Pathway Variant	Binary Phenotype	Vital, 2014	Thl	Hbd	Crt	Bcd	EtfA2	EtfB2	CtfA	CtfB	ButT	But	Ptb	Buk	Bdh	Cat	AbfH	AldD	GctA	GctB	GcdA	GcdB	GcdC	HgdA	HgdB	HgdC	AbfD	KamE1	KamE2	KamD1	KamD2	KamA	KDD	KCE	KAL	LysE1	LysE2
730.11	[Haemophilus] ducreyi strain Cutaneous leg ulcer strain 2	Haemophilus	[Haemophilus] ducreyi	-1	0																															1206
592010.4	Abiotrophia defectiva ATCC 49176	Abiotrophia	Abiotrophia defectiva	-1	0			1370											1747, 1864							234
85698.28	Achromobacter xylosoxidans strain NCTC10807	Achromobacter	Achromobacter xylosoxidans	-1	0		118, 2315, 3332, 3773, 4168, 4176, 4440, 4444, 4732	4126, 4354, 5723		106, 2482, 2604, 440, 4439, 4883, 879																												5585		4604, 4821, 6022, 753, 795	2309
591001.3	Acidaminococcus fermentans DSM 20731	Acidaminococcus	Acidaminococcus fermentans	P13	1	+	1460, 396	1458, 808	1457, 582	1459, 1558, 1566	590	589							553	1803, 83			1810	1809	1808, 1828	1825		1806	1805	1807
575584.3	Acinetobacter baumannii ATCC 19606	Acinetobacter	Acinetobacter baumannii	-1	0		1070, 1893, 2711, 2721, 276	699		2113, 2595, 2975, 3142, 3150, 3628, 489, 696, 707, 93																										2048				2405, 2888, 661	1252, 1344, 584, 649
416269.6	Actinobacillus pleuropneumoniae L20	Actinobacillus	Actinobacillus pleuropneumoniae	-1	0		926												1934, 1935																	707					209
1655.52	Actinomyces naeslundii strain ATCC 27039	Actinomyces	Actinomyces naeslundii	-1	0
411466.7	Actinomyces odontolyticus ATCC 17982	Actinomyces	Actinomyces odontolyticus	-1	0					505
883077.3	Actinomyces turicensis ACS-279-V-Col4	Actinomyces	Actinomyces turicensis	-1	0					210
1384484.3	Adlercreutzia equolifaciens DSM 19450	Adlercreutzia	Adlercreutzia equolifaciens	-1	0					947, 950, 959	955	954							2288
655812.3	Aerococcus viridans ATCC 11563	Aerococcus	Aerococcus viridans	-1	0		1383, 156, 960
380703.7	Aeromonas hydrophila subsp. hydrophila ATCC 7966	Aeromonas	Aeromonas hydrophila	-1	0		131, 2155		2419										498																					3579, 3580, 99
1408437.6	Agathobaculum desmolans ATCC 43058	Agathobaculum	Agathobaculum desmolans	P12	1		817	815	816	1802, 2955	1804, 2851, 2957, 2965	1803, 2956	1066	1067		826			1685	1580	1581										820
985008.3	Aggregatibacter aphrophilus ATCC 33389	Aggregatibacter	Aggregatibacter aphrophilus	-1	0																															1549					296
349741.6	Akkermansia muciniphila ATCC BAA-835	Akkermansia	Akkermansia muciniphila	-1	0														1778
1120974.3	Alistipes onderdonkii DSM 19147	Alistipes	Alistipes onderdonkii	-1	0														2515																	2849
445970.5	Alistipes putredinis DSM 17216	Alistipes	Alistipes putredinis	P4	1	+			1997	1995	1993	1994	2009	1998					62													1999	1999	2001	2001	2004	2006	2007, 2008	2008	651
561177.4	Anaerococcus hydrogenalis DSM 7454	Anaerococcus	Anaerococcus hydrogenalis	P1	1	+	1043	1203, 1902, 1932	29	1270, 1928	1930	1929				1931			825
525919.6	Anaerococcus prevotii DSM 20548	Anaerococcus	Anaerococcus prevotii	P1	1	+	1462	1282, 1289, 1463	1464	1467	1465	1466				1461
525255.3	Anaerococcus tetradius ATCC 35098	Anaerococcus	Anaerococcus tetradius	P1	1	+	1019	1018	1017	1014, 1304, 1619	1016	1015				1020
445971.6	Anaerofustis stercorihominis DSM 17244	Anaerofustis	Anaerofustis stercorihominis	P12	1	+	1137	1135	1136	1134, 735	1132	1133				894, 911			2061, 2239, 312, 377	1128	245										1127
411490.6	Anaerostipes caccae DSM 14662	Anaerostipes	Anaerostipes caccae	P12	1	+	345	343	3205, 344	1351, 2752, 2755, 342, 545	1353, 1357, 2753, 3202, 340, 543	1352, 1356, 2754, 3201, 341, 544	3184	3185		1162			1192, 1376, 1595, 1618, 1718, 2723, 3178, 3229	259	260										2559									895
649757.3	Anaerostipes hadrus DSM 3319	Anaerostipes	Anaerostipes hadrus	P1	1		2430	2432	2431	2433, 689, 788	2435, 687	2434, 688	268			2438			2259, 584																			776
445972.6	Anaerotruncus colihominis DSM 17241	Anaerotruncus	Anaerotruncus colihominis	P1	1	+	3838	3836	3837	3835	3833	3834					3726	3727	3476, 632
997872.3	Atopobium minutum 10063974	Atopobium	Atopobium minutum	-1	0			1372											438
692420.6	Bacillus amyloliquefaciens DSM7	Bacillus	Bacillus amyloliquefaciens	-1	0		1207	2488, 2489		459									3162, 3163																	2208				1259
526980.3	Bacillus cereus ATCC 10876	Bacillus	Bacillus cereus	-1	0		4557, 5154	473	1718, 2217	3258, 3967, 5769									4698																	3187				2462	3255
1196029.3	Bacillus endophyticus 2102	Bacillus	Bacillus endophyticus	-1	0		1115, 1577, 2837, 3997, 4536	3941, 3998, 4296		1802, 3659, 4297, 4298, 4537									4604, 4909																	2725, 2727				4019, 4850
1367477.3	Bacillus infantis NRRL B-14911	Bacillus	Bacillus infantis	-1	0		1357, 2196, 2251	1490, 2195, 4783, 940																												3215
279010.13	Bacillus licheniformis ATCC 14580	Bacillus	Bacillus licheniformis	-1	0			4037											3365
592022.4	Bacillus megaterium DSM319	Bacillus	Bacillus megaterium	-1	0		2283, 2444	1591, 2269, 5149											2295, 2818																	2289, 4018				2493	3346
526997.3	Bacillus mycoides DSM 2048	Bacillus	Bacillus mycoides	-1	0		3851, 4331	5516	1160, 1788	2573									3954																	2538				1911, 2220, 2678, 2679	2578
224308.1	Bacillus subtilis subsp. subtilis str. 168	Bacillus	Bacillus subtilis	-1	0		1035	2420		3724, 452																										1973
1118061.3	Bacteroidales bacterium ph8	Alistipes	Alistipes obesi	-1	0														1197																					1568
411901.7	Bacteroides caccae ATCC 43185	Bacteroides	Bacteroides caccae	-1	0																															3417				2584
537012.5	Bacteroides cellulosilyticus DSM 14838	Bacteroides	Bacteroides cellulosilyticus	-1	0														351, 4479																	3335				4763
470145.6	Bacteroides coprocola DSM 17136	Bacteroides	Bacteroides coprocola	-1	0														3663																					2126
547042.5	Bacteroides coprophilus DSM 18228	Bacteroides	Bacteroides coprophilus	-1	0														3273																					2791
483217.6	Bacteroides dorei DSM 17855	Bacteroides	Bacteroides dorei	-1	0														3136																	4051				484
483216.6	Bacteroides eggerthii DSM 20697	Bacteroides	Bacteroides eggerthii	-1	0														3277																					1716
1077285.3	Bacteroides faecis MAJ27	Bacteroides	Bacteroides faecis	-1	0														3994																	1931				4208
483215.6	Bacteroides finegoldii DSM 17565	Bacteroides	Bacteroides finegoldii	-1	0														1718																	1094				4005
862962.3	Bacteroides fragilis 638R	Bacteroides	Bacteroides fragilis	-1	0																															3525				1327
384639.4	Bacteroides galacturonicus strain DSM 3978	Bacteroides	Bacteroides galacturonicus	-1	0
471870.8	Bacteroides intestinalis DSM 17393	Bacteroides	Bacteroides intestinalis	-1	0														2753, 3336																	3841				2999
997884.3	Bacteroides nordii CL02T12C05	Bacteroides	Bacteroides nordii	-1	0														2053, 3447, 4093																	1534				3123
411476.11	Bacteroides ovatus ATCC 8483	Bacteroides	Bacteroides ovatus	-1	0														3214, 3624																	4494				3804
483218.5	Bacteroides pectinophilus ATCC 43243	-	[Bacteroides] pectinophilus	-1	0														1384
484018.6	Bacteroides plebeius DSM 17135	Bacteroides	Bacteroides plebeius	-1	0														352, 545																					2917
1121099.3	Bacteroides propionicifaciens DSM 19291	Bacteroides	Bacteroides propionicifaciens	-1	0																																			998
1235809.3	Bacteroides pyogenes JCM 6292	Bacteroides	Bacteroides pyogenes	-1	0														3416																	186				2367
667015.3	Bacteroides salanitronis DSM 18170	Bacteroides	Bacteroides salanitronis	-1	0														574																					796
1121101.3	Bacteroides salyersiae WAL 10018 = DSM 18765 = JCM 12988	Bacteroides	Bacteroides salyersiae	-1	0														2791, 2903																	669				2509
1236538.3	Bacteroides sartorii JCM 16497	Bacteroides	Bacteroides sartorii	-1	0																															2682
449673.7	Bacteroides stercoris ATCC 43183	Bacteroides	Bacteroides stercoris	-1	0														1532																	1410				3034
226186.1	Bacteroides thetaiotaomicron VPI-5482	Bacteroides	Bacteroides thetaiotaomicron	-1	0														535																	4472				1732
411479.10	Bacteroides uniformis ATCC 8492	Bacteroides	Bacteroides uniformis	-1	0														1610																	1454
1121102.3	Bacteroides ureolyticus DSM 20703	Campylobacter	Campylobacter ureolyticus	-1	0
435590.9	Bacteroides vulgatus ATCC 8482	Bacteroides	Bacteroides vulgatus	-1	0														3109																	2810				80
657309.4	Bacteroides xylanisolvens XB1A	Bacteroides	Bacteroides xylanisolvens	-1	0														3521																	2428				3696
384636.4	Bacteroides xylanolyticus strain DSM 3808	Bacteroides	Bacteroides xylanolyticus	P2	1		1722			2334, 875, 877	2332, 873	2333, 874	1720	1719					3384, 3775, 3805	2343, 2344	2346	2347									2345
742726.3	Barnesiella intestinihominis YIT 11860	Barnesiella	Barnesiella intestinihominis	-1	0																																			1866
367928.6	Bifidobacterium adolescentis ATCC 15703	Bifidobacterium	Bifidobacterium adolescentis	-1	0																																				285
518635.5	Bifidobacterium angulatum DSM 20098	Bifidobacterium	Bifidobacterium angulatum	-1	0
555970.3	Bifidobacterium animalis subsp. lactis DSM 10140	Bifidobacterium	Bifidobacterium animalis	-1	0
500634.6	Bifidobacterium bifidum ATCC 29521 = JCM 1255 = DSM 20456	Bifidobacterium	Bifidobacterium bifidum	-1	0																																				353
326426.4	Bifidobacterium breve UCC2003	Bifidobacterium	Bifidobacterium breve	-1	0														1530																						1437
566552.4	Bifidobacterium catenulatum DSM 16992	Bifidobacterium	Bifidobacterium catenulatum	-1	0
473819.7	Bifidobacterium dentium ATCC 27678	Bifidobacterium	Bifidobacterium dentium	-1	0														41		812																				358
561180.4	Bifidobacterium gallicum DSM 20093	Bifidobacterium	Bifidobacterium gallicum	-1	0
391904.8	Bifidobacterium longum subsp. infantis ATCC 15697 = JCM 1222	Bifidobacterium	Bifidobacterium longum	-1	0
565042.3	Bifidobacterium longum subsp. longum JCM 1217	Bifidobacterium	Bifidobacterium longum	-1	0
547043.16	Bifidobacterium pseudocatenulatum DSM 20438 = JCM 1200 = LMG 10505	Bifidobacterium	Bifidobacterium pseudocatenulatum	-1	0														1236
1150461.5	Bifidobacterium scardovii JCM 12489 = DSM 13734	Bifidobacterium	Bifidobacterium scardovii	-1	0														917, 93																						467
563192.3	Bilophila wadsworthia 3_1_6	Bilophila	Bilophila wadsworthia	-1	0			42	40	41							1260	1261													39									833	823
537007.6	Blautia hansenii DSM 20583	Blautia	Blautia hansenii	-1	0
476272.5	Blautia hydrogenotrophica DSM 10507	Blautia	Blautia hydrogenotrophica	-1	0						3285	3286		2675			1442, 218, 2510, 316, 881	1446, 207, 2465, 2509, 2892, 315, 880	2097, 370
1121114.4	Blautia producta ATCC 27340	Blautia	Blautia producta	P1	1		1791	1789	1790	1788								1783, 1902	3013												1792					1915				2405
1121115.4	Blautia wexlerae DSM 19850	Blautia	Blautia wexlerae	-1	0														2734
1133568.3	Brachyspira pilosicoli B2904	Brachyspira	Brachyspira pilosicoli	P1	1		2089	2087	2088, 305	2093, 2094, 304	302	303				2092			492
1129895.3	Brevibacillus brevis FJAT-0809-GLX	Brevibacillus	Brevibacillus brevis	-1	0		1247, 1731, 3188, 3189, 360	1691, 3186, 3437	3184										4134																	1686				113, 4873
1176165.3	Brevibacterium massiliense 5401308	Brevibacterium	Brevibacterium ravenspurgense	-1	0		1025, 1311, 1418, 256	133, 170, 976		122
679192.3	Bulleidia extructa W1219	Bulleidia	Bulleidia extructa	-1	0			507											839
1834205.4	Burkholderiales bacterium YL45	-	-	-1	0														1187																					2329, 993
1203606.4	Butyricicoccus pullicaecorum 1.2	Butyricicoccus	Butyricicoccus pullicaecorum	P1	1		612	614	613	2773, 631, 821	2775, 629	2774, 630				634			2546		608					1636	1637				609
1121129.3	Butyricimonas synergistica DSM 23225	Butyricimonas	Butyricimonas synergistica	P14	1		1615	1685	1686	1616	1618	1617	1604	1614				590														1613	1613	1612	1612	1609, 958	1607, 1608	1605, 1606	1605
511680.4	Butyrivibrio crossotus DSM 2876	Butyrivibrio	Butyrivibrio crossotus	P1	1	+	198	196	197	195	193	194					217	218								82
1121262.4	Caloramator proteoclasticus DSM 10124	Caloramator	Caloramator proteoclasticus	P14	1		466	2047	1838	1837, 2050, 471	2048, 469	2049, 470	2568	2567			328, 397	327, 329														852	852	851	851	848	846, 847	859, 860
864566.3	Campylobacter coli JV20	Campylobacter	Campylobacter coli	-1	0
199.248	Campylobacter concisus strain ATCC 33237	Campylobacter	Campylobacter concisus	-1	0														1866
197.5249	Campylobacter jejuni strain NCTC11351	Campylobacter	Campylobacter jejuni	-1	0																																			1157
553218.4	Campylobacter rectus RM3267	Campylobacter	Campylobacter rectus	-1	0														227																					2880
883165.3	Campylobacter ureolyticus ACS-301-V-Sch3b	Campylobacter	Campylobacter ureolyticus	-1	0
521097.5	Capnocytophaga ochracea DSM 7271	Capnocytophaga	Capnocytophaga ochracea	-1	0					720
553177.6	Capnocytophaga sputigena ATCC 33612	Capnocytophaga	Capnocytophaga sputigena	-1	0					257
451640.5	Catenibacterium mitsuokai DSM 15897	Catenibacterium	Catenibacterium mitsuokai	-1	0			1607
1319815.3	Cetobacterium somerae ATCC BAA-474	Cetobacterium	Cetobacterium somerae	P14	1		1527, 2027	2023	1525, 2022	2436		2435	2025	2026	73				2382, 750													2013	2013	2014	2014	2017	2018	2019	2020	1168
626937.8	Christensenella minuta strain DSM 22607	Christensenella	Christensenella minuta	P12	1		1208, 794	1202, 793		1943, 810	1945, 812	1944, 811		1206					352	1937, 1940	1938	1941									1933, 795							1204
1006003.3	Citrobacter freundii ATCC 8090 = MTCC 1658	Citrobacter	Citrobacter freundii	-1	0		2603, 4059, 536	4725, 535																												2744				2011, 2012	4037
290338.8	Citrobacter koseri ATCC BAA-895	Citrobacter	Citrobacter koseri	-1	0		158, 377			2489																										3090					137
1118059.3	Clostridiales bacterium ph2	Kallipyga	Kallipyga massiliensis	P13	1		1581	1579, 224	1580	1578, 736	1576	1577							1341				1070	1071	1072	1078		1073	1074	1075
272562.8	Clostridium acetobutylicum ATCC 824	Clostridium	Clostridium acetobutylicum	P1	1	+	3057, 78	2898	2902	2901	2899	2900		165			3259	1863, 3258	3477		1774																				2783
1128398.3	Clostridium acidurici 9a	Gottschalkia	Gottschalkia acidurici	-1	0														2720																	448				1957, 554
518636.5	Clostridium asparagiforme DSM 15981	Lachnoclostridium	[Clostridium] asparagiforme	-1	0					621	623	622							1340, 1644																	3158				2723
445973.7	Clostridium bartlettii DSM 16795	Intestinibacter	Intestinibacter bartlettii	-1	0												1091, 2717	1090, 2719
290402.41	Clostridium beijerinckii NCIMB 8052	Clostridium	Clostridium beijerinckii	P12	1	+	3765, 424	335, 3967	2097, 2101, 331, 3479, 4720	2098, 2991, 332, 4718	2100, 2996, 334	2099, 2997, 333	2751, 3979	2750, 3980			208	209, 4162, 4788	1991, 2507	2169	5122										2166									3299, 3545	2148
1233170.3	Clostridium bifermentans ATCC 19299	Paraclostridium	Paraclostridium bifermentans	-1	0					2338	2336						251	1737, 252	2853, 579									2340	2339	2341
411902.9	Clostridium bolteae ATCC BAA-613	Lachnoclostridium	[Clostridium] bolteae	-1	0		430, 4543, 985	1676									1047, 5246, 5873	1048, 5247, 5871	1589, 2020, 4357	5226																2913		4130
508765.6	Clostridium botulinum B str. Eklund 17B	Clostridium	Clostridium botulinum	P1	1	+	437	346	1912, 342	1297, 1367, 1910, 343	1294, 345	1293, 344	2050, 632	2049, 633			266	267	2425, 3120	721
1316931.3	Clostridium butyricum DSM 10702	Clostridium	Clostridium butyricum	P1	1		2945	3003	3007	1747, 3006	3004	1751, 3005, 3032					233	234	426		1129
1280692.3	Clostridium cadaveris AGR2141	Clostridium	Clostridium cadaveris	P14	1		1849	2235, 349	1688, 2779, 353	1691, 352, 399	1694, 350, 397	1692, 1693, 351					552	551	1514, 2729	2620											2619	3188	3188	3187	3187	3184	3183	3181, 3182	3181
573061.5	Clostridium cellulovorans 743B	Clostridium	Clostridium cellulovorans	P1	1	+	197, 3154	3065	3071	2713, 3069	2711, 3066	2712, 3067					3792	3791	1177																	2762
717608.3	Clostridium cf. saccharolyticum K10	Lachnoclostridium	[Clostridium] saccharolyticum	P13	1	+		1774	1773	1775	1777	1776				1771			1523	13			3225	3226	3227	3224	3222, 3223	3229	3230	3228											3469
720554.3	Clostridium clariflavum DSM 19732	Ruminiclostridium	[Clostridium] clariflavum	-1	0														982
999410.3	Clostridium clostridioforme CM201	Lachnoclostridium	[Clostridium] clostridioforme	P1	1		1272, 1435, 2501, 3851	1531, 2494, 2503	2502	2504, 3744, 3747	2506, 3749	2505, 3748	2499	2500				5708	1410, 645																	5002		1003, 2496		2637
499175.4	Clostridium difficile ATCC 43255	Clostridioides	Clostridioides difficile	P12	1		2311, 2548	621	442, 620	445, 45, 617	447, 47, 619	446, 46, 618	2312	2313			3403	2003, 3404		1965	1964	1967									1966					1880
1121315.3	Clostridium glycolicum ATCC 14880	Terrisporobacter	Terrisporobacter glycolicus	-1	0					1502, 3805	1500, 3807	1501, 3806					1449, 17	1447, 18, 3333	3781		1664											3447, 3448	3447, 3448			795		1499
566550.8	Clostridium hathewayi DSM 13479	Hungatella	Hungatella hathewayi	-1	0		2979										3708	3710	129																					5020
500633.7	Clostridium hiranonis DSM 13275	-	[Clostridium] hiranonis	-1	0												3	309, 4	1168		510
553973.6	Clostridium hylemonae DSM 15053	Lachnoclostridium	[Clostridium] hylemonae	-1	0														260, 2956																	1051				2822
999413.4	Clostridium innocuum 2959	Erysipelatoclostridium	[Clostridium] innocuum	P1	1		4904, 4905	4900	4899	2597, 4903	4901	4902	4898	4898					1678, 1751, 1909, 2437, 388, 4172, 4534		2905
428125.8	Clostridium leptum DSM 753	Ruminiclostridium	[Clostridium] leptum	-1	0														1334, 864
500632.7	Clostridium nexile DSM 1787	Tyzzerella	Tyzzerella nexilis	-1	0														2278, 2933																					3043
742738.3	Clostridium orbiscindens 1_3_50AFAA	Flavonifractor	Flavonifractor plautii	P124	1		2212, 25, 2665, 3250, 3274, 530	2666, 4024, 536, 614, 718	309, 687, 717	1257, 490, 719	720	4376	26	27	2242		2663, 3568	3567	529	312, 3237	2658, 388, 3991, 550										3233, 492	2252	2252	2253	2253	2254	1053, 2255	1052, 1055, 2256, 2652, 3267, 3437, 531, 535, 575, 616	3437		3499
1262449.3	Clostridium pasteurianum DSM 525	Clostridium	Clostridium pasteurianum	P14	1		2490, 3284	1305, 1640	1309, 2136	1308, 3250	1306	1307	3307, 3400	3306, 3399			2453	2454	1436, 329		2223, 530											2415		2416		2419	2420	2421, 2422	2422	2612
195103.9	Clostridium perfringens ATCC 13124	Clostridium	Clostridium perfringens	P1	1	+	2386	2482	2486, 79	2485	2483	2484					2550	2549	820		496
445974.6	Clostridium ramosum DSM 1402	Erysipelatoclostridium	Erysipelatoclostridium ramosum	-1	0
411468.9	Clostridium scindens ATCC 35704	Lachnoclostridium	[Clostridium] scindens	-1	0														1556, 1557, 2045, 2177																	1040
1504.35	Clostridium septicum strain DSM 7534	Clostridium	Clostridium septicum	P1	1		2021	1928	1924	1925	1927	1926					1872	1873	2861
1292036.3	Clostridium sordellii ATCC 9714	Paeniclostridium	Paeniclostridium sordellii	-1	0							1105					883, 884		3007, 3008, 3009									1102	1103	1101
428126.7	Clostridium spiroforme DSM 1552	Erysipelatoclostridium	[Clostridium] spiroforme	-1	0														111, 1972
471871.7	Clostridium sporogenes ATCC 15579	Clostridium	Clostridium sporogenes	P1	1	+	367	366	365	1389, 284, 368	1391, 286, 370	1390, 285, 369					118	117, 119	1889, 2155
411472.5	Clostridium symbiosum ATCC 14940	Lachnoclostridium	[Clostridium] symbiosum	P123	1		434, 4355, 479	433, 4353, 481	435, 471, 480	468, 482, 561, 610	1626, 465, 484	1625, 466, 483				4356, 464			3440, 3974, 3975	1284, 1954, 2036, 3936	1959, 2702		730	731	732	729	727, 728	4351, 734	4352, 438, 735	733	1953									1347
1121342.3	Clostridium tyrobutyricum DSM 2637 = ATCC 25755	Clostridium	Clostridium tyrobutyricum	P12	1		1843, 375	1735, 2635	1739, 1773	1721, 1738, 2024, 2831, 68	1723, 1736	1724, 1737							1701, 918	1321, 700	705							2808	2809		702										1095
411903.6	Collinsella aerofaciens ATCC 25986	Collinsella	Collinsella aerofaciens	-1	0
521003.7	Collinsella intestinalis DSM 13280	Collinsella	Collinsella intestinalis	-1	0														70
445975.6	Collinsella stercoris DSM 13279	Collinsella	Collinsella stercoris	-1	0														1300
742742.3	Collinsella tanakaei YIT 12063	Collinsella	Collinsella tanakaei	-1	0			1532			2113	2112							133
399795.3	Comamonas testosteroni KF-1	Comamonas	Comamonas testosteroni	-1	0		1164, 1674, 2739, 3645, 3665, 3673, 4571, 5056, 854	288		2126, 2539																														1859
1297794.4	Coprobacillus cateniformis JCM 10604	Coprobacillus	Coprobacillus cateniformis	-1	0			1172											4033, 4034
470146.3	Coprococcus comes ATCC 27758	Coprococcus	Coprococcus comes	P1	1	+	1561, 1565	1559	1560	1558	1556	1557					1562	1563, 1564	107, 2643, 2824
411474.6	Coprococcus eutactus ATCC 27759	Coprococcus	Coprococcus eutactus	P1	1	+	2036	2034	2035	2033	2031	2032					2164	2163	438	589
548476.3	Corynebacterium aurimucosum ATCC 700975	Corynebacterium	Corynebacterium aurimucosum	-1	0		2199, 612, 613, 901																																		1890
272564.6	Desulfitobacterium hafniense DCB-2	Desulfitobacterium	Desulfitobacterium hafniense	P1	1	+	2801, 2972, 3693, 3792, 629	2800, 2979, 3798	2971, 4712	2802, 2978, 2980, 3602, 3799, 4778	2976, 3794, 4783	2977, 3795, 4784				2973, 4704		3692					2803	2804
1121444.3	Desulfovibrio desulfuricans subsp. aestuarii DSM 17919 = ATCC 29578	Halodesulfovibrio	Halodesulfovibrio aestuarii	-1	0														848																					1724
411464.8	Desulfovibrio piger ATCC 29098	Desulfovibrio	Desulfovibrio piger	-1	0																1581																			707	2103
592028.3	Dialister invisus DSM 15470	Dialister	Dialister invisus	-1	0																					1713, 1716, 1720
411461.4	Dorea formicigenerans ATCC 27755	Dorea	Dorea formicigenerans	-1	0			507											715
411462.6	Dorea longicatena DSM 13814	Dorea	Dorea longicatena	-1	0														32		1889
471854.5	Dyadobacter fermentans DSM 18053	Dyadobacter	Dyadobacter fermentans	-1	0
500638.3	Edwardsiella tarda ATCC 23685	Edwardsiella	Edwardsiella tarda	-1	0																															212				3127	2865
479437.5	Eggerthella lenta DSM 2243	Eggerthella	Eggerthella lenta	-1	0				1915, 3190	1899, 3187	1920	1921							2990
999415.3	Eggerthia catenaformis OT 569 = DSM 20559	Eggerthia	Eggerthia catenaformis	-1	0			1560											142
1432052.14	Eisenbergiella tayi strain DSM 26961	Eisenbergiella	Eisenbergiella tayi	P1	1		1889, 6230	6232	6231, 656	6233	6235	6234					6266	6265	3273, 5898												6187, 667									3160
1028307.3	Enterobacter aerogenes KCTC 2190	Klebsiella	Klebsiella aerogenes	-1	0		1600, 3502, 4890	3501		2370, 3449																										1826				475
716541.4	Enterobacter cloacae subsp. cloacae ATCC 13047	Enterobacter	Enterobacter cloacae complex	-1	0		2338, 2584, 3841, 4328, 5087			1308																										815				4333	5107
1140002.4	Enterococcus avium ATCC 14025	Enterococcus	Enterococcus avium	-1	0												1435	1434	1217, 4381
888066.3	Enterococcus casseliflavus ATCC 12755	Enterococcus	Enterococcus casseliflavus	-1	0														1405
1140001.4	Enterococcus durans ATCC 6056	Enterococcus	Enterococcus durans	-1	0		2680
525271.4	Enterococcus faecalis ATCC 29200	Enterococcus	Enterococcus faecalis	-1	0												363		2386							2524
1158600.4	Enterococcus faecium ATCC 8459	Enterococcus	Enterococcus faecium	-1	0
768486.3	Enterococcus hirae ATCC 9790	Enterococcus	Enterococcus hirae	-1	0		2610
1158602.4	Enterococcus raffinosus ATCC 49464	Enterococcus	Enterococcus raffinosus	-1	0												1737	1738	1947, 3690
1139996.4	Enterococcus saccharolyticus ATCC 43076	Enterococcus	Enterococcus saccharolyticus	-1	0														78
511145.12	Escherichia coli str. K-12 substr. MG1655	Escherichia	Escherichia coli	-1	0		2438, 3959																													4278					3939
585054.5	Escherichia fergusonii ATCC 35469	Escherichia	Escherichia fergusonii	-1	0		2688, 3507, 788		4098																											4035					3550
1115512.3	Escherichia hermannii NBRC 105704	Atlantibacter	Atlantibacter hermannii	-1	0		1421, 3604, 771			3998			667	668																						1043				3412	3625
518637.5	Eubacterium biforme DSM 3989	Holdemanella	Holdemanella biformis	P1	1	+	1236, 1237	1241	1242	1238	1240	1239	1243, 1244	1243, 1244					473
1321814.3	Eubacterium brachy ATCC 33089	-	[Eubacterium] brachy	-1	0						326	1106, 327							465	1034								291, 330	329
1408436.3	Eubacterium cellulosolvens LD2006	Eubacterium	[Eubacterium] cellulosolvens	P1	1	+	1123	1120	1122	1119	1117	1118				1124			1550	481
290054.4	Eubacterium coprostanoligenes strain ATCC 51222	Eubacterium	Eubacterium coprostanoligenes	-1	0														1520	960
717960.3	Eubacterium cylindroides T2-87	Faecalitalea	Faecalitalea cylindroides	P1	1		649, 662			663	665	664	666	666
428127.7	Eubacterium dolichum DSM 3991	Absiella	Absiella dolichum	P1	1	+	1746	1750	1751	1747, 92	1749	1748	1752	1752					577
411469.3	Eubacterium hallii DSM 3353	Eubacterium	[Eubacterium] hallii	P1	1	+	60	62	61	1733, 63	1732, 65	1731, 64				304				2843
903814.3	Eubacterium limosum KIST612	Eubacterium	Eubacterium limosum	P1	1	+	506	508	3503, 507	293, 3501, 509	293, 511	292, 510				2640	3673, 784			3192											258									1336	1929
1256908.3	Eubacterium ramulus ATCC 29099	Eubacterium	Eubacterium ramulus	P14	1		2061	2060, 2424	2655	1103	1101	1102	2942	2941			2419	2418, 943	1074													1722	1722	1723	1723	1724	1725	1726, 1728, 2422	1728		2369
515619.6	Eubacterium rectale ATCC 33656	-	[Eubacterium] rectale	P1	1	+	626	627	854	628	630	629				2673			2654
887325.3	Eubacterium saburreum DSM 3986	Lachnoanaerobaculum	Lachnoanaerobaculum saburreum	P1	1	+	663	1157, 665	2538, 2541, 664	2822, 344	2814, 342	2816, 343	662	661					329, 563
592031.3	Eubacterium saphenum ATCC 49989	-	[Eubacterium] saphenum	P12	1	+	228, 278	727		717	719	718							589	131	132										129					240	179
428128.7	Eubacterium siraeum DSM 15702	Ruminiclostridium	[Eubacterium] siraeum	-1	0
411463.4	Eubacterium ventriosum ATCC 27560	Eubacterium	Eubacterium ventriosum	P1	1	+	2406	2408	2407	2409	2411	2410					2419	2418	816
864565.3	Eubacterium yurii subsp. margaretiae ATCC 43715	Peptoanaerobacter	[Eubacterium] yurii	P13	1	+	1061	1057	827	1060, 1096, 1347, 1672	1058, 1670	1059, 1097, 1671				539			601	1747			1938	1939	1940	1937	1936	1700	1699	1701	1749
718252.3	Faecalibacterium prausnitzii L2-6	Faecalibacterium	Faecalibacterium prausnitzii	P1	1	+	243	241	242	240	238	239				245			1906
546269.3	Filifactor alocis ATCC 35896	Filifactor	Filifactor alocis	P13	1		400	401	1719, 402	398	396	397							1712	585			1581	1582	1583	1580	1579	1585	1586	1584
525282.5	Finegoldia magna ATCC 53516	Finegoldia	Finegoldia magna	-1	0			987											1557
411475.3	Flavonifractor plautii ATCC 29863	Flavonifractor	Flavonifractor plautii	P124	1		2625, 2911, 326, 339, 3752, 713	1170, 1995, 2650	170, 2649, 2705, 578	2651, 3302	2653	2652	3753	3754	1787		2269	2270	712	2687	1453, 1576, 2864										2691	2525	2525	2526	2526	2527	1896, 2528	1551, 1895, 1898, 1993, 214, 2529, 2704, 2908, 314, 714	214		3655
469615.3	Fusobacterium gonidiaformans ATCC 25563	Fusobacterium	Fusobacterium gonidiaformans	P134	1	+	1184	1049	1048	564, 594, 779	566, 781	565, 780	513	514	512				1187	1588			279	280	281	278	277	284	285	283		1138	1138	1137	1137	1134	1133	1131, 1132	1131	1430, 617	1430
469616.3	Fusobacterium mortiferum ATCC 9817	Fusobacterium	Fusobacterium mortiferum	P1	1	+	68	70	69, 908	613, 747, 909	911	910	550	549	2555	391			1742, 2233, 675, 820																					290
525283.3	Fusobacterium nucleatum subsp. nucleatum ATCC 23726	Fusobacterium	Fusobacterium nucleatum	P134	1	+	1524	153	154	1381, 1644	1379	1380, 1643	1002	1003	1001				1185	263			758	757	756	759	760	753	752	754		997	997	996	996	993	992	990, 991	990	1400	998
469618.3	Fusobacterium varium ATCC 27725	Fusobacterium	Fusobacterium varium	P134	1	+	960, 978	958	451, 959	1413, 452	454	453	2875	2876	2873				1973, 2631	2244			1303	1304	1305	1302	1301	1308	1309	1307	2242	842	842	843	843	846, 847	848	1894, 2486, 2724, 849, 850	850	859
546270.5	Gemella haemolysans ATCC 10379	Gemella	Gemella haemolysans	-1	0		615
562983.3	Gemella sanguinis M325	Gemella	Gemella sanguinis	-1	0		1205
745368.3	Gemmiger formicilis strain ATCC 27749	Gemmiger	Gemmiger formicilis	P1	1		2685	2683	2684	2682	2680	2681					2688	2689
1077975.4	Gordonia rubripertincta NBRC 101908	Gordonia	Gordonia rubripertincta	-1	0		1073, 1265, 1480, 152, 1660, 2069, 3356, 3376, 3744, 4444	2247, 4081		1299, 153, 1655, 1657, 1658, 1678, 2203, 2419, 2543, 3004, 3028, 3035, 3036, 3038, 3039, 3330, 3331, 3374, 3388, 3396, 3422, 350, 3785, 4177, 4447, 4585													2062
638301.3	Granulicatella adiacens ATCC 49175	Granulicatella	Granulicatella adiacens	-1	0		1418			1674									511
888728.3	Haemophilus aegyptius ATCC 11116	Haemophilus	Haemophilus aegyptius	-1	0																															1416					1161
727.305	Haemophilus influenzae Hi375	Haemophilus	Haemophilus influenzae	-1	0																															730
888828.3	Haemophilus parainfluenzae ATCC 33392	Haemophilus	Haemophilus parainfluenzae	-1	0														1917																	1942					633
1002364.3	Hafnia alvei ATCC 51873	Hafnia	Hafnia alvei	-1	0		1974, 2257, 259			3133																										2645				1148	220, 2618
613026.4	Helicobacter bilis ATCC 43879	Helicobacter	Helicobacter bilis	-1	0				1442																															2230
537970.5	Helicobacter canadensis MIT 98-5491	Helicobacter	Helicobacter canadensis	-1	0
85963.7	Helicobacter pylori J99	Helicobacter	Helicobacter pylori	-1	0		699																																	719
545696.5	Holdemania filiformis DSM 12042	Holdemania	Holdemania filiformis	-1	0														1802
1297617.3	Intestinimonas butyriciproducens ER1	Intestinimonas	Intestinimonas butyriciproducens	P124	1		1524, 2419, 2635, 2898, 2935, 3396	2252, 2515, 3172, 3635, 41	1091, 2788, 40	3379	3378	3377	2418	1517, 2417		2836			3157, 456, 734	1335, 2647, 2707	2650							2845	1339	2846	2649	95	95	96	96	97	98	100, 2636, 2841, 2903, 3173, 3247, 3633	101		219
629741.3	Kingella oralis ATCC 51147	Kingella	Kingella oralis	-1	0																																				2080, 2741
1006551.4	Klebsiella oxytoca KCTC 1686	Klebsiella	Klebsiella michiganensis	-1	0		1573, 365, 410, 427, 5353			2349, 4535																										1760					4459
507522.6	Klebsiella pneumoniae 342	Klebsiella	Klebsiella pneumoniae	-1	0		1045, 1573, 2373, 3030, 5198	2372		2317, 4424																										5010				2887, 4427	2419, 5224, 954
1236550.3	Kocuria palustris PEL	Kocuria	Kocuria palustris	-1	0		1049, 1282, 1448, 1556, 297			1388																														860
478801.5	Kytococcus sedentarius DSM 20547	Kytococcus	Kytococcus sedentarius	-1	0		2044, 2250, 666, 890
1122142.3	Lachnobacterium bovis DSM 14045	Lachnobacterium	Lachnobacterium bovis	P1	1		965	966	1243	967	969	968				865					2418
28052.3	Lachnospira pectinoschiza	Lachnospira	Lachnospira pectinoschiza	-1	0
525306.3	Lactobacillus acidophilus ATCC 4796	Lactobacillus	Lactobacillus acidophilus	-1	0		306
585524.3	Lactobacillus amylolyticus DSM 11664	Lactobacillus	Lactobacillus amylolyticus	-1	0		1501
525309.3	Lactobacillus antri DSM 16041	Lactobacillus	Lactobacillus antri	-1	0		1175	344
387344.15	Lactobacillus brevis ATCC 367	Lactobacillus	Lactobacillus brevis	-1	0		2123	575		1814	1816	1815
525318.3	Lactobacillus buchneri ATCC 11577	Lactobacillus	Lactobacillus buchneri	-1	0		2	843
321967.11	Lactobacillus casei ATCC 334	Lactobacillus	Lactobacillus paracasei	-1	0		1767												2086
999378.3	Lactobacillus casei LC2W	Lactobacillus	Lactobacillus casei	-1	0		1928												2226
575595.3	Lactobacillus crispatus 125-2-CHN	Lactobacillus	Lactobacillus crispatus	-1	0		1940
390333.7	Lactobacillus delbrueckii subsp. bulgaricus ATCC 11842	Lactobacillus	Lactobacillus delbrueckii	-1	0		812
525325.3	Lactobacillus fermentum ATCC 14931	Lactobacillus	Lactobacillus fermentum	-1	0		1016	1007
324831.13	Lactobacillus gasseri ATCC 33323	Lactobacillus	Lactobacillus gasseri	-1	0		1363
1144300.3	Lactobacillus gastricus PS3	Lactobacillus	Lactobacillus gastricus	-1	0		600
888801.3	Lactobacillus iners ATCC 55195	Lactobacillus	Lactobacillus iners	-1	0		131
440497.10	Lactobacillus jensenii 1153	Lactobacillus	Lactobacillus jensenii	-1	0		1142	245
525330.3	Lactobacillus johnsonii ATCC 33200	Lactobacillus	Lactobacillus johnsonii	-1	0		481
1130798.3	Lactobacillus mucosae LM1	Lactobacillus	Lactobacillus mucosae	-1	0		802
1136177.4	Lactobacillus pentosus KCA1	Lactobacillus	Lactobacillus pentosus	-1	0					1615
525338.3	Lactobacillus plantarum subsp. plantarum ATCC 14917	Lactobacillus	Lactobacillus plantarum	-1	0					103																														1878
557436.4	Lactobacillus reuteri DSM 20016	Lactobacillus	Lactobacillus reuteri	-1	0		55	108
1002365.5	Lactobacillus rhamnosus ATCC 21052	Lactobacillus	Lactobacillus rhamnosus	-1	0		1939												2414
525362.3	Lactobacillus ruminis ATCC 25644	Lactobacillus	Lactobacillus ruminis	-1	0																																				245
314315.12	Lactobacillus sakei subsp. sakei 23K	Lactobacillus	Lactobacillus sakei	-1	0		1449
362948.14	Lactobacillus salivarius UCC118	Lactobacillus	Lactobacillus salivarius	-1	0			212
420889.6	Lactococcus garvieae ATCC 49156	Lactococcus	Lactococcus garvieae	-1	0		1060, 1206, 1250, 1347, 1361, 1405, 1509, 1646, 606, 642, 707, 850, 946
1104322.3	Lactococcus lactis subsp. cremoris A76	Lactococcus	Lactococcus lactis	-1	0		1021, 1948, 937
596323.3	Leptotrichia goodfellowii F0264	Leptotrichia	Leptotrichia goodfellowii	-1	0														292
586220.3	Leuconostoc mesenteroides subsp. cremoris ATCC 19254	Leuconostoc	Leuconostoc mesenteroides	-1	0
882095.3	Listeria monocytogenes ATCC 19117	Listeria	Listeria monocytogenes	-1	0		1433												592
1122184.3	Lutispora thermophila DSM 19022	Lutispora	Lutispora thermophila	P14	1		1921	1536	1535	1532	1534	1533	1374	1375	3485		3002									1209						2662	2662	2661	2661	2658	2656, 2657	2757, 2758		516
1231627.3	Lysinibacillus fusiformis ZB2	Lysinibacillus	Lysinibacillus fusiformis	-1	0		1004, 1234, 3059	2878, 3012	3272	2728, 2737, 3856									4246																					189, 204, 2646	3610
657316.3	Megamonas hypermegale ART12/1	Megamonas	Megamonas hypermegale	-1	0		1626												574, 575																						147
907.4	Megasphaera elsdenii	Megasphaera	Megasphaera elsdenii	P12	1		1381, 1382	1792	1793	1530, 370, 62	368	369	35	34					1576	701, 776, 791	696						1418				702										2009
465515.4	Micrococcus luteus NCTC 2665	Micrococcus	Micrococcus luteus	-1	0		1114, 1891, 1957, 724	1959, 1966		1893
548479.6	Mobiluncus curtisii ATCC 43063	Mobiluncus	Mobiluncus curtisii	-1	0
871571.3	Mobiluncus mulieris ATCC 35239	Mobiluncus	Mobiluncus mulieris	-1	0
1239989.3	Morganella morganii SC01	Morganella	Morganella morganii	-1	0		1416, 1821, 431			47																										2472				2709	3131, 3660
1112856.4	Mycoplasma pneumoniae 309	Mycoplasma	Mycoplasma pneumoniae	-1	0
883150.3	Myroides odoratimimus CCUG 10230	Myroides	Myroides odoratimimus	-1	0		2280	3079		1843, 2281, 2718									1083
490.6	Neisseria sicca strain FDAARGOS_260	Neisseria	Neisseria sicca	-1	0					2729
546268.4	Neisseria subflava NJ9703	Neisseria	Neisseria subflava	-1	0					1284
1122603.3	Nevskia ramosa DSM 11499	Nevskia	Nevskia ramosa	-1	0		195, 2324, 3417, 3485, 3498, 509			1314, 231, 233, 234, 2534, 2641, 2718, 3178, 3392, 3415, 3510, 3776, 3859																										689		3227
439375.7	Ochrobactrum anthropi ATCC 49188	Ochrobactrum	Ochrobactrum anthropi	-1	0		3257, 4207	1062, 4885	919																															1907, 3168	3450, 540
742817.3	Odoribacter laneus YIT 12061	Odoribacter	Odoribacter laneus	P14	1			2180	2181	2184	2182	2183	2195	2185				951	2538													2186	2186	2187	2187	2191	2192	2193, 2194	2194
1007096.3	Oscillibacter ruminantium GH1	Oscillibacter	Oscillibacter ruminantium	P13	1		1030, 1183	1184, 2252	1181, 2253	2126, 2251, 2405, 2408	2249, 2403	2250, 2404				1962			107, 634	206			522	521	529	532		1179, 527	1178, 528	526										750
556268.6	Oxalobacter formigenes HOxBLS	Oxalobacter	Oxalobacter formigenes	-1	0														1027
1261128.3	Pantoea agglomerans 299R	Pantoea	Pantoea agglomerans	-1	0		1083, 3552			1790																										132				2271, 2756	2051, 3600
435591.13	Parabacteroides distasonis ATCC 8503	Parabacteroides	Parabacteroides distasonis	-1	0														570																	592				2588
927665.4	Parabacteroides goldsteinii DSM 19448 = WAL 12034	Parabacteroides	Parabacteroides goldsteinii	-1	0														3701																	3477				2495
1122931.3	Parabacteroides gordonii DSM 23371	Parabacteroides	Parabacteroides gordonii	-1	0														1876																	130				3502
999419.3	Parabacteroides johnsonii CL02T12C29	Parabacteroides	Parabacteroides johnsonii	-1	0														3102																					2096
411477.4	Parabacteroides merdae ATCC 43184	Parabacteroides	Parabacteroides merdae	-1	0														1956																	2399				427
332977.5	Parapedobacter koreensis Jip14	Parapedobacter	Parapedobacter koreensis	-1	0		3515	2321		1209, 3514, 4571, 627
762968.3	Paraprevotella clara YIT 11840	Paraprevotella	Paraprevotella clara	-1	0														145																	94				1275
762982.3	Paraprevotella xylaniphila YIT 11841	Paraprevotella	Paraprevotella xylaniphila	-1	0														2365, 312																	726				683
762966.3	Parasutterella excrementihominis YIT 11859	Parasutterella	Parasutterella excrementihominis	-1	0
411465.10	Parvimonas micra ATCC 33270	Parvimonas	Parvimonas micra	-1	0														41
1306952.3	Pediococcus acidilactici D3	Pediococcus	Pediococcus acidilactici	-1	0		456
278197.12	Pediococcus pentosaceus ATCC 25745	Pediococcus	Pediococcus pentosaceus	-1	0
2741.3	Peptococcus niger strain DSM 20475	Peptococcus	Peptococcus niger	P1	1		1073	1075	1074	211, 415	213, 561	212, 416, 560				1883				115
573058.3	Peptoniphilus asaccharolyticus DSM 20463 strain DSM 20463	Peptoniphilus	Peptoniphilus asaccharolyticus	P13	1		214	216	215	1035	1037	1036				880							36	37	38	35	34	40	41	39
908338.3	Peptoniphilus harei ACS-146-V-Sch2b	Peptoniphilus	Peptoniphilus harei	P13	1	+	1226	1224	1225	1175, 1317, 1438	1173	1174, 1311, 1316				454			1187				1054	1053	1052	1055	1056	1050	1049	1051
997350.3	Peptoniphilus indolicus ATCC 29427	Peptoniphilus	Peptoniphilus indolicus	P13	1		666	668	667	1797, 351	1799, 355	1798, 354				1951			788	1818			565	566	567	564	563	345, 569	344, 570	346, 568	1816
1122949.3	Peptoniphilus lacrimalis DSM 7455	Peptoniphilus	Peptoniphilus lacrimalis	P13	1		830	832	829, 831	1019, 497	499	498				693			469				990	991	992	989	988	994	995	993
1122950.3	Peptostreptococcus anaerobius DSM 2949	Peptostreptococcus	Peptostreptococcus anaerobius	-1	0					1889, 522, 722	1887, 524, 720	1888, 523, 721					1062, 804	104, 805	1033											519
1122957.3	Phascolarctobacterium faecium DSM 14760	Phascolarctobacterium	Phascolarctobacterium faecium	-1	0		422			1600	389	390							1726, 960						1708, 2271	2265, 787	2264, 788													536	1511
626939.3	Phascolarctobacterium sp. YIT 12067	Phascolarctobacterium	Phascolarctobacterium succinatutens	-1	0		1660			59	1785	1783							981							1255
879243.3	Porphyromonas asaccharolytica DSM 20707	Porphyromonas	Porphyromonas asaccharolytica	P124	1			1579, 562	561	558	560	559	548	557					1295	1294, 428	427	426									430	556	556	555	555	552	551	549, 550	549	1242
431947.6	Porphyromonas gingivalis ATCC 33277	Porphyromonas	Porphyromonas gingivalis	P14	1	+		1162	1161	1158	1160	1159	1148	1157					1236	1854, 712	711	710									714	1156	1156	1155	1155	1152	1151	1149, 1150	1149
1122978.3	Prevotella albensis DSM 11370	Prevotella	Prevotella albensis	-1	0														935																					637
868129.3	Prevotella bivia DSM 20514	Prevotella	Prevotella bivia	-1	0																																			585
873513.3	Prevotella buccae ATCC 33574	Prevotella	Prevotella buccae	-1	0														939																					1893
537011.5	Prevotella copri DSM 18205	Prevotella	Prevotella copri	-1	0																																			2766, 383
1122981.3	Prevotella corporis DSM 18810	Prevotella	Prevotella corporis	-1	0																																			1007
1122982.4	Prevotella denticola DSM 20614	Prevotella	Prevotella denticola	-1	0																																			1877
1235811.5	Prevotella disiens JCM 6334 = ATCC 29426	Prevotella	Prevotella disiens	-1	0																																			2795
28131.5	Prevotella intermedia strain ATCC 49046	Prevotella	Prevotella intermedia	-1	0																																			2480
553174.6	Prevotella melaninogenica ATCC 25845	Prevotella	Prevotella melaninogenica	-1	0														1398																					900
1122988.3	Prevotella nanceiensis DSM 19126	Prevotella	Prevotella nanceiensis	-1	0																																			275
997352.4	Prevotella nigrescens ATCC 33563	Prevotella	Prevotella nigrescens	-1	0																																			495
702438.4	Prevotella oulorum F0390	Prevotella	Prevotella oulorum	-1	0																																			243
997353.4	Prevotella pallens ATCC 700821	Prevotella	Prevotella pallens	-1	0																																			1243
888832.3	Prevotella salivae DSM 15606	Prevotella	Prevotella salivae	-1	0																																			2546
1002367.3	Prevotella stercorea DSM 18206	Prevotella	Prevotella stercorea	-1	0																																			2426
626522.3	Prevotella tannerae ATCC 51259	Alloprevotella	Alloprevotella tannerae	-1	0														2017, 2131, 4336, 4710																					2964, 629
1122992.6	Prevotella timonensis 4401737 = DSM 22865 = JCM 15640	Prevotella	Prevotella timonensis	-1	0																																			2977
1122993.3	Prevotella veroralis DSM 19559	Prevotella	Prevotella veroralis	-1	0																																			2372
1091045.3	Propionibacterium acnes ATCC 11828	Cutibacterium	Cutibacterium acnes	-1	0					799
525369.4	Proteus mirabilis ATCC 29906	Proteus	Proteus mirabilis	-1	0		2731, 735			1664																										2383				148, 3365
585.9	Proteus vulgaris strain ATCC 49132	Proteus	Proteus vulgaris	-1	0		1918, 3604			54									2359																	1256				1123, 2510, 996
521000.6	Providencia rettgeri DSM 1131	Providencia	Providencia rettgeri	-1	0		1377, 2384, 2696, 3870																																	1246, 2114	1779, 3659
471874.6	Providencia stuartii ATCC 25827	Providencia	Providencia stuartii	-1	0		2308, 2953, 3372			3675																														1431, 3078	3477
1123011.4	Pseudobutyrivibrio ruminis DSM 9787	Pseudobutyrivibrio	Pseudobutyrivibrio ruminis	P1	1		1183	1184	1569	1185	1187	1186				2235	1868	1867
411467.62	Pseudoflavonifractor capillosus ATCC 29799	Pseudoflavonifractor	Pseudoflavonifractor capillosus	-1	0														799
381754.6	Pseudomonas aeruginosa PA7	Pseudomonas	Pseudomonas aeruginosa	-1	0		1614, 2061, 2560, 3401, 5233	3476, 5871		2254, 2561, 4417, 4781													285	286																2154, 2805, 895	2034, 3813, 4889, 5203
1221522.3	Pseudomonas fluorescens NCIMB 11764	Pseudomonas	Pseudomonas fluorescens	-1	0		1607, 1671, 2206, 2246, 2359, 2892, 3896, 5824, 668	1500, 5188		1099, 2248, 2356, 2358, 3815, 4581													389	390												4177				1877, 2718, 3801	3811, 4458, 4597, 4651, 5592, 649
32042.3	Pseudomonas stutzeri ATCC 14405 = CCUG 16156	Pseudomonas	Pseudomonas stutzeri	-1	0		234, 3915, 522, 523			1321, 1591, 2031, 233													1427	1428																2727	4115
352165.3	Pyramidobacter piscolens W5455	Pyramidobacter	Pyramidobacter piscolens	-1	0		1806			1731	1729	1730	1804	1805			2505		1793	896						1325
234621.6	Rhodococcus erythropolis PR4	Rhodococcus	Rhodococcus erythropolis	-1	0		1234, 1348, 1583, 1670, 1897, 3339, 4427, 4811, 5046, 5047, 5455, 5471, 5480, 5660, 5662, 572, 5754, 6049, 6199, 640, 75, 81, 842	2060, 5567, 6124, 6247		1155, 1236, 1340, 1341, 2246, 2379, 2803, 3266, 401, 5212, 5393, 5450, 5453, 5479, 5487, 5566, 5593, 5661, 5685, 5747, 5751, 5804, 5821, 78, 844													2583	2582														5708, 5713		6155
585394.18	Roseburia hominis A2-183	Roseburia	Roseburia hominis	P1	1		557	558	1922, 2398	1918, 1921, 559	1919, 1927, 561	1920, 1926, 560				2772
536231.5	Roseburia intestinalis L1-82	Roseburia	Roseburia intestinalis	P1	1	+	37	31, 36	507	30	28	29				1874			3014
622312.4	Roseburia inulinivorans DSM 16841	Roseburia	Roseburia inulinivorans	P1	1	+	3631	3630	484	3629, 99	3627	3628				3231
762948.4	Rothia dentocariosa ATCC 17931	Rothia	Rothia dentocariosa	-1	0					792, 834
553201.3	Rothia mucilaginosa ATCC 25296	Rothia	Rothia mucilaginosa	-1	0					461
1089547.3	Rudanella lutea DSM 19387	Rudanella	Rudanella lutea	-1	0		2139, 2888, 506			2852
246199.4	Ruminococcus albus 8	Ruminococcus	Ruminococcus albus	-1	0														1426																					1620
657321.5	Ruminococcus bromii L2-63	Ruminococcus	Ruminococcus bromii	-1	0
1123075.3	Ruminococcus gauvreauii DSM 19829	Ruminococcus	Ruminococcus gauvreauii	P1	1		2022	2014	3300	3823, 3871	3297, 3821	3296, 3822							2011, 2726, 3279, 890		3301										2020, 3298					3316
411470.6	Ruminococcus gnavus ATCC 29149	Blautia	[Ruminococcus] gnavus	-1	0														2612, 3080
411459.7	Ruminococcus obeum ATCC 29174	Blautia	Blautia obeum	-1	0														2871
213810.4	Ruminococcus sp. 18P13	Ruminococcus	Ruminococcus champanellensis	-1	0				2082										1549
411460.6	Ruminococcus torques ATCC 27756	Blautia	[Ruminococcus] torques	-1	0														420, 619
718274.8	Salmonella enterica subsp. enterica serovar Typhimurium str. T000240	Salmonella	Salmonella enterica	-1	0		2495, 4285			328										3303																4642					4262
641146.3	Scardovia inopinata F0304	Scardovia	Scardovia inopinata	-1	0		495
1123242.3	Schlesneria paludicola DSM 18645	Schlesneria	Schlesneria paludicola	-1	0		2829, 4740, 5285			1081, 1702, 261, 2822, 4273, 5286
546271.3	Selenomonas sputigena ATCC 35185	Selenomonas	Selenomonas sputigena	-1	0														1630							263
47917.12	Serratia fonticola strain GS2	Serratia	Serratia fonticola	-1	0		243, 4635			1874																										1132				1014, 2444, 550	2401
1123253.3	Silanimonas lenta DSM 16282	Silanimonas	Silanimonas lenta	-1	0		1720, 190, 701			1054, 255																										253
742818.3	Slackia piriformis YIT 12062	Slackia	Slackia piriformis	-1	0			1747		1090, 1095, 1098									1286
504472.7	Spirosoma linguale DSM 74	Spirosoma	Spirosoma linguale	-1	0		1530, 6083	71
762962.3	Staphylococcus aureus subsp. aureus ATCC 51811	Staphylococcus	Staphylococcus aureus	-1	0		118, 1467, 1594			1651, 2233																														1179
904334.4	Staphylococcus capitis VCU116	Staphylococcus	Staphylococcus capitis	-1	0		163, 1711			623																														108, 825	194
176280.1	Staphylococcus epidermidis ATCC 12228	Staphylococcus	Staphylococcus epidermidis	-1	0		2384, 346		221	1858																														735, 736	2365
629742.3	Staphylococcus hominis SK119	Staphylococcus	Staphylococcus hominis	-1	0		1280, 951			586
1141106.7	Staphylococcus intermedius NCTC 11048	Staphylococcus	Staphylococcus intermedius	-1	0		1849																																	1
883164.3	Staphylococcus lugdunensis ACS-027-V-Sch2	Staphylococcus	Staphylococcus lugdunensis	-1	0		1098, 664			1386							398																							2, 2345, 2346
883166.5	Staphylococcus simulans ACS-120-V-Sch1	Staphylococcus	Staphylococcus simulans	-1	0		224, 424		682	119																														849	742
1262650.3	Staphylococcus xylosus NJ	Staphylococcus	Staphylococcus xylosus	-1	0		1564, 1644, 1786		806									2579																						589	1388
1105272.3	Streptococcus agalactiae LMG 15081	Streptococcus	Streptococcus agalactiae	-1	0		93	1753
1328.82	Streptococcus anginosus strain NCTC10713	Streptococcus	Streptococcus anginosus	P1	1		647	648	646	642			645	644
1035184.3	Streptococcus constellatus subsp. pharyngis SK1060	Streptococcus	Streptococcus constellatus	P1	1		785	786	784	778			783	782
663952.3	Streptococcus dysgalactiae subsp. dysgalactiae ATCC 27957	Streptococcus	Streptococcus dysgalactiae	-1	0		1700, 559						1701	1702
981539.3	Streptococcus gallolyticus subsp. gallolyticus ATCC 43143	Streptococcus	Streptococcus gallolyticus	-1	0														2123
889204.3	Streptococcus infantis ATCC 700779	Streptococcus	Streptococcus infantis	-1	0
1316583.3	Streptococcus intermedius ATCC 27335	Streptococcus	Streptococcus intermedius	-1	0
864567.3	Streptococcus mitis ATCC 6249	Streptococcus	Streptococcus mitis	P1	1		332	331	333	337			334	335
1257041.3	Streptococcus mutans ATCC 25175	Streptococcus	Streptococcus mutans	-1	0					866
888048.3	Streptococcus parasanguinis ATCC 903	Streptococcus	Streptococcus parasanguinis	-1	0
981540.3	Streptococcus pasteurianus ATCC 43144	Streptococcus	Streptococcus pasteurianus	-1	0
561276.4	Streptococcus pneumoniae ATCC 700669	Streptococcus	Streptococcus pneumoniae	-1	0
160490.1	Streptococcus pyogenes M1 GAS	Streptococcus	Streptococcus pyogenes	-1	0		102, 1261, 376						103, 1262	104, 1263	1749
347253.5	Streptococcus salivarius JIM8777	Streptococcus	Streptococcus salivarius	-1	0					584
997356.4	Streptococcus sanguinis ATCC 29667	Streptococcus	Streptococcus sanguinis	-1	0					1348
299768.6	Streptococcus thermophilus CNRZ1066	Streptococcus	Streptococcus thermophilus	-1	0					660
889206.3	Streptococcus vestibularis ATCC 49124	Streptococcus	Streptococcus vestibularis	-1	0					1112
411471.5	Subdoligranulum variabile DSM 15176	Subdoligranulum	Subdoligranulum variabile	P1	1	+	2491, 3227	2493, 3229	2492, 3228	2494, 3230	2496, 3232	2495, 3231					2489, 3225	2488, 3224									4141
762967.3	Sutterella parvirubra YIT 11816	Sutterella	Sutterella parvirubra	-1	0														1786, 744
742823.3	Sutterella wadsworthensis 2_1_59BFAA	Sutterella	Sutterella wadsworthensis	-1	0														1082, 1914
457415.3	Synergistes sp. 3_1_syn1	Synergistes	-	-1	0		2468, 521						2817	2818			1133, 734	1134, 1331, 2479	912		1424																			402
203275.8	Tannerella forsythia ATCC 43037	Tannerella	Tannerella forsythia	P2	1					1341	1343	1342							2171	1338	1339	1340									1336					1619				849
203267.6	Tropheryma whipplei str. Twist	Tropheryma	Tropheryma whipplei	-1	0
910310.3	Turicibacter sp. HGF1	Turicibacter	-	-1	0														2559, 714, 715
95664.6	Ureaplasma urealyticum serovar 10	Ureaplasma	Ureaplasma urealyticum	-1	0
1123488.3	Varibaculum cambriense DSM 15806	Varibaculum	Varibaculum cambriense	-1	0
866776.4	Veillonella atypica ACS-049-V-Sch6	Veillonella	Veillonella atypica	-1	0		780				573	572													1030	1034	1033														704
546273.3	Veillonella dispar ATCC 17748	Veillonella	Veillonella dispar	-1	0		435				1503	1502													1182	1186	1185														1649
686660.3	Veillonella parvula ATCC 17745	Veillonella	Veillonella parvula	-1	0		258				716	717													1777	1773	1774														562
883156.3	Veillonella ratti ACS-216-V-Col6b	Veillonella	Veillonella seminalis	-1	0		97			87	976	975							1402						253	250	251
903510.3	Vibrio furnissii NCTC 11218	Vibrio	Vibrio furnissii	-1	0		2468, 3367, 338			1050, 2235																										576				1743, 3141, 3530, 3954, 4190	206, 4119
340101.3	Victivallis vadensis ATCC BAA-548	Victivallis	Victivallis vadensis	-1	0
911104.3	Weissella cibaria KACC 11862	Weissella	Weissella cibaria	-1	0			1015											629, 87
1045854.4	Weissella koreensis KACC 15510	Weissella	Weissella koreensis	-1	0		1291
630.33	Yersinia enterocolitica strain ATCC 9610	Yersinia	Yersinia enterocolitica	-1	0		2381, 4088			363																										4182				3260, 3471, 3592, 90
1002368.3	Yokenella regensburgei ATCC 43003	Yokenella	Yokenella regensburgei	-1	0		3072, 35, 4180																													214					54
Functional roles:
Bcd	Butyryl-CoA dehydrogenase (EC 1.3.99.2)
EtfA2	Electron bifurcating butyryl-CoA dehydrogenase, electron transfer flavoprotein alpha
EtfB2	Electron bifurcating butyryl-CoA dehydrogenase, electron transfer flavoprotein beta
CtfA	Butyrate--acetoacetate CoA-transferase subunit A (EC 2.8.3.9)
CtfB	Butyrate--acetoacetate CoA-transferase subunit B (EC 2.8.3.9)
But	Butyryl-CoA:acetate CoA-transferase (EC 2.8.3.8)
Ptb	Phosphate butyryltransferase (EC 2.3.1.19)
Buk	Butyrate kinase (EC 2.7.2.7)
Thl	3-ketoacyl-CoA thiolase (EC 2.3.1.16)
Hbd	3-hydroxybutyryl-CoA dehydrogenase (EC 1.1.1.157)
Crt	3-hydroxybutyryl-CoA dehydratase (EC 4.2.1.55)
Cat	4-hydroxybutyrate:acetyl-CoA CoA transferase (EC 2.3.1.-)
AbfH	NAD-dependent 4-hydroxybutyrate dehydrogenase (EC 1.1.1.61)
AldD	Succinate-semialdehyde dehydrogenase, CoA-dependent
AbfD	4-hydroxybutanoyl-CoA dehydratase (EC 4.2.1.120)
GctA	Glutaconate CoA-transferase subunit A (EC 2.8.3.12)
GctB	Glutaconate CoA-transferase subunit B (EC 2.8.3.12)
GcdA	Glutaconyl-CoA decarboxylase alpha subunit (EC 4.1.1.70)
GcdB	Glutaconyl-CoA decarboxylase beta subunit (EC 4.1.1.70)
GcdC	Glutaconyl-CoA decarboxylase subunit gamma (EC 4.1.1.70) (Biotin carrier)
HgdA	2-hydroxyglutaryl-CoA dehydratase, D-component HgdA
HgdB	2-hydroxyglutaryl-CoA dehydratase, D-component HgdB
HgdC	2-hydroxyglutaryl-CoA dehydratase activator, A-component
KamE1	L-beta-lysine 5,6-aminomutase beta subunit (EC 5.4.3.3)
KamE2	D-lysine 5,6-aminomutase beta subunit (EC 5.4.3.4)
KamD1	L-beta-lysine 5,6-aminomutase alpha subunit (EC 5.4.3.3)
KamD2	D-lysine 5,6-aminomutase alpha subunit (EC 5.4.3.4)
KamA	Lysine 2,3-aminomutase (EC 5.4.3.2)
KDD	3,5-diaminohexanoate dehydrogenase (EC 1.4.1.11)
KCE	3-keto-5-aminohexanoate cleavage enzyme (EC 2.3.1.247)
KAL	3-aminobutyryl-CoA ammonia-lyase (EC 4.3.1.14)
LysE1	Transporter, LysE family
LysE2	L-lysine permease
Bdh	NADH-dependent butanol dehydrogenase A (EC 1.1.1.-)
ButT	Predicted butyrate efflux transporter

## Sheet: Propionate
Table S1. C. Metabolic subsystem of genes involved in Propionate synthesis in reference human gut bacterial genomes.
Genome id	Genome name	Genus	Species	Pathway Variant	Binary Phenotype	PduC	PduD	PduE	PduC2	PduD2	PduG	PduP	PduL	PduQ	PduW	PrpP	Pct	Acr	LcdA	LcdB	LcdC	LcdX	Mce	MutB	MutA	MutA2	MutB2	MutC	Mmd	MmdA	MmdB	MmdC	MmdD	MmdE	MMCT_5S	MMCT_12S	AarC	PST
730.11	[Haemophilus] ducreyi strain Cutaneous leg ulcer strain 2	Haemophilus	[Haemophilus] ducreyi	-1	0
592010.4	Abiotrophia defectiva ATCC 49176	Abiotrophia	Abiotrophia defectiva	-1	0																									233, 237	234	235	236
85698.28	Achromobacter xylosoxidans strain NCTC10807	Achromobacter	Achromobacter xylosoxidans	-1	0
591001.3	Acidaminococcus fermentans DSM 20731	Acidaminococcus	Acidaminococcus fermentans	-1	0																									1828	1825	1826	1827				1829
575584.3	Acinetobacter baumannii ATCC 19606	Acinetobacter	Acinetobacter baumannii	-1	0
416269.6	Actinobacillus pleuropneumoniae L20	Actinobacillus	Actinobacillus pleuropneumoniae	-1	0
1655.52	Actinomyces naeslundii strain ATCC 27039	Actinomyces	Actinomyces naeslundii	-1	0
411466.7	Actinomyces odontolyticus ATCC 17982	Actinomyces	Actinomyces odontolyticus	-1	0
883077.3	Actinomyces turicensis ACS-279-V-Col4	Actinomyces	Actinomyces turicensis	-1	0
1384484.3	Adlercreutzia equolifaciens DSM 19450	Adlercreutzia	Adlercreutzia equolifaciens	-1	0
655812.3	Aerococcus viridans ATCC 11563	Aerococcus	Aerococcus viridans	-1	0
380703.7	Aeromonas hydrophila subsp. hydrophila ATCC 7966	Aeromonas	Aeromonas hydrophila	-1	0								1336, 1337
1408437.6	Agathobaculum desmolans ATCC 43058	Agathobaculum	Agathobaculum desmolans	-1	0												818
985008.3	Aggregatibacter aphrophilus ATCC 33389	Aggregatibacter	Aggregatibacter aphrophilus	-1	0
349741.6	Akkermansia muciniphila ATCC BAA-835	Akkermansia	Akkermansia muciniphila	P1	1																		235	2265	2262, 2266					236	239	238					241
1120974.3	Alistipes onderdonkii DSM 19147	Alistipes	Alistipes onderdonkii	P1	1																		378	2516	2517					377	374	375
445970.5	Alistipes putredinis DSM 17216	Alistipes	Alistipes putredinis	P1	1																		301	2284	2282		297			302	305	304
561177.4	Anaerococcus hydrogenalis DSM 7454	Anaerococcus	Anaerococcus hydrogenalis	P3	1				881	880		870, 871, 878
525919.6	Anaerococcus prevotii DSM 20548	Anaerococcus	Anaerococcus prevotii	-1	0
525255.3	Anaerococcus tetradius ATCC 35098	Anaerococcus	Anaerococcus tetradius	-1	0								1517
445971.6	Anaerofustis stercorihominis DSM 17244	Anaerofustis	Anaerofustis stercorihominis	-1	0
411490.6	Anaerostipes caccae DSM 14662	Anaerostipes	Anaerostipes caccae	P2	1											3203	3024, 3204	3206				3205
649757.3	Anaerostipes hadrus DSM 3319	Anaerostipes	Anaerostipes hadrus	-1	0																									899	902		900
445972.6	Anaerotruncus colihominis DSM 17241	Anaerotruncus	Anaerotruncus colihominis	-1	0								888																	3192	61	3191
997872.3	Atopobium minutum 10063974	Atopobium	Atopobium minutum	-1	0								1171
692420.6	Bacillus amyloliquefaciens DSM7	Bacillus	Bacillus amyloliquefaciens	-1	0																		2467							2466
526980.3	Bacillus cereus ATCC 10876	Bacillus	Bacillus cereus	-1	0
1196029.3	Bacillus endophyticus 2102	Bacillus	Bacillus endophyticus	P1	1												2999						1095			1084, 4299	1085			1096
1367477.3	Bacillus infantis NRRL B-14911	Bacillus	Bacillus infantis	P1	1																		3519	3528		4779	3527			3518
279010.13	Bacillus licheniformis ATCC 14580	Bacillus	Bacillus licheniformis	-1	0																									2606
592022.4	Bacillus megaterium DSM319	Bacillus	Bacillus megaterium	P1	1								3641				3589						4411		4420	4419, 5145	4418			4410
526997.3	Bacillus mycoides DSM 2048	Bacillus	Bacillus mycoides	-1	0
224308.1	Bacillus subtilis subsp. subtilis str. 168	Bacillus	Bacillus subtilis	-1	0																		2397							2396
1118061.3	Bacteroidales bacterium ph8	Alistipes	Alistipes obesi	P1	1																		587	968	969					588	875	590
411901.7	Bacteroides caccae ATCC 43185	Bacteroides	Bacteroides caccae	P1	1																		2605	2938	2937		1597			2604	2601, 3393	2602						1299
537012.5	Bacteroides cellulosilyticus DSM 14838	Bacteroides	Bacteroides cellulosilyticus	P1	1																		3199	801	800					3198	1965, 3195, 5071	3196						1789
470145.6	Bacteroides coprocola DSM 17136	Bacteroides	Bacteroides coprocola	P1	1																		702	3416	3415					701	698	699						203
547042.5	Bacteroides coprophilus DSM 18228	Bacteroides	Bacteroides coprophilus	P1	1																		3135	3040	3041					3136	3139	3138						298, 901
483217.6	Bacteroides dorei DSM 17855	Bacteroides	Bacteroides dorei	P1	1																		3716	125	126		2729			3715	3711, 3783	3712						2113
483216.6	Bacteroides eggerthii DSM 20697	Bacteroides	Bacteroides eggerthii	P1	1																		1122	227	226					1121	1118	1119						3082
1077285.3	Bacteroides faecis MAJ27	Bacteroides	Bacteroides faecis	P1	1																		3564, 4163	4603	4604					4164	1889, 4167	4166						703
483215.6	Bacteroides finegoldii DSM 17565	Bacteroides	Bacteroides finegoldii	P1	1																		3378	1571	1572					3377	3374	3375						3544
862962.3	Bacteroides fragilis 638R	Bacteroides	Bacteroides fragilis	P1	1																		3244	3750	3751		788			3245	1141, 3249	3248						26
384639.4	Bacteroides galacturonicus strain DSM 3978	Bacteroides	Bacteroides galacturonicus	-1	0																									349	346	347	348
471870.8	Bacteroides intestinalis DSM 17393	Bacteroides	Bacteroides intestinalis	P1	1																		3919	250	251					3920	1343, 3923	3922						980
997884.3	Bacteroides nordii CL02T12C05	Bacteroides	Bacteroides nordii	P1	1																		3161	3818	3817					3160	1499, 3157	3158						348
411476.11	Bacteroides ovatus ATCC 8483	Bacteroides	Bacteroides ovatus	P1	1																		3783	2761	2760					3784	3787, 4466	1323, 3786						2439
483218.5	Bacteroides pectinophilus ATCC 43243	-	[Bacteroides] pectinophilus	-1	0																									1360	1363	1362	1361
484018.6	Bacteroides plebeius DSM 17135	Bacteroides	Bacteroides plebeius	P1	1																		2742	2174	2173					2741	2738	2739						3046, 989
1121099.3	Bacteroides propionicifaciens DSM 19291	Bacteroides	Bacteroides propionicifaciens	P1	1																		271	477	476					272	275	274						173
1235809.3	Bacteroides pyogenes JCM 6292	Bacteroides	Bacteroides pyogenes	P1	1																		2169	1597	1598		3167, 3168			2168	2164, 2165	2166						288
667015.3	Bacteroides salanitronis DSM 18170	Bacteroides	Bacteroides salanitronis	P1	1																		3058	566	568		3421			3057	3054	3055						1482, 2369
1121101.3	Bacteroides salyersiae WAL 10018 = DSM 18765 = JCM 12988	Bacteroides	Bacteroides salyersiae	P1	1																		2545	3910	3911					2544	2541	2542						1896
1236538.3	Bacteroides sartorii JCM 16497	Bacteroides	Bacteroides sartorii	P1	1																		3119	3659	3660		1661			3118	2818, 2819, 3115	3116						846
449673.7	Bacteroides stercoris ATCC 43183	Bacteroides	Bacteroides stercoris	P1	1																		207	2815	2816					208	211	210						2054
226186.1	Bacteroides thetaiotaomicron VPI-5482	Bacteroides	Bacteroides thetaiotaomicron	P1	1																		1685	2090	2091					1686	1689, 4413	1448, 1688						3192
411479.10	Bacteroides uniformis ATCC 8492	Bacteroides	Bacteroides uniformis	P1	1																		1623	1829	1830					1624	1627, 3566	1626						790
1121102.3	Bacteroides ureolyticus DSM 20703	Campylobacter	Campylobacter ureolyticus	-1	0
435590.9	Bacteroides vulgatus ATCC 8482	Bacteroides	Bacteroides vulgatus	P1	1																		2573	316	315		2002			2572	2569	2570						1211
657309.4	Bacteroides xylanisolvens XB1A	Bacteroides	Bacteroides xylanisolvens	P1	1																		3672	4782	4781					3673	3677	3676						1132
384636.4	Bacteroides xylanolyticus strain DSM 3808	Bacteroides	Bacteroides xylanolyticus	P3	1				2593	2592		4670	1477, 253, 4665																	2236, 2240	2237	2238	2239
742726.3	Barnesiella intestinihominis YIT 11860	Barnesiella	Barnesiella intestinihominis	P1	1																		418	1512	1511					417	414	415						2703
367928.6	Bifidobacterium adolescentis ATCC 15703	Bifidobacterium	Bifidobacterium adolescentis	-1	0
518635.5	Bifidobacterium angulatum DSM 20098	Bifidobacterium	Bifidobacterium angulatum	-1	0
555970.3	Bifidobacterium animalis subsp. lactis DSM 10140	Bifidobacterium	Bifidobacterium animalis	-1	0
500634.6	Bifidobacterium bifidum ATCC 29521 = JCM 1255 = DSM 20456	Bifidobacterium	Bifidobacterium bifidum	-1	0
326426.4	Bifidobacterium breve UCC2003	Bifidobacterium	Bifidobacterium breve	-1	0
566552.4	Bifidobacterium catenulatum DSM 16992	Bifidobacterium	Bifidobacterium catenulatum	-1	0
473819.7	Bifidobacterium dentium ATCC 27678	Bifidobacterium	Bifidobacterium dentium	-1	0
561180.4	Bifidobacterium gallicum DSM 20093	Bifidobacterium	Bifidobacterium gallicum	-1	0
391904.8	Bifidobacterium longum subsp. infantis ATCC 15697 = JCM 1222	Bifidobacterium	Bifidobacterium longum	-1	0																						977
565042.3	Bifidobacterium longum subsp. longum JCM 1217	Bifidobacterium	Bifidobacterium longum	-1	0
547043.16	Bifidobacterium pseudocatenulatum DSM 20438 = JCM 1200 = LMG 10505	Bifidobacterium	Bifidobacterium pseudocatenulatum	-1	0
1150461.5	Bifidobacterium scardovii JCM 12489 = DSM 13734	Bifidobacterium	Bifidobacterium scardovii	-1	0
563192.3	Bilophila wadsworthia 3_1_6	Bilophila	Bilophila wadsworthia	-1	0
537007.6	Blautia hansenii DSM 20583	Blautia	Blautia hansenii	-1	0								122																	485, 489	486	487
476272.5	Blautia hydrogenotrophica DSM 10507	Blautia	Blautia hydrogenotrophica	-1	0																									306	303	304	305
1121114.4	Blautia producta ATCC 27340	Blautia	Blautia producta	-1	0								3320, 4841																	3239, 3243	3242, 4101	3241	3240
1121115.4	Blautia wexlerae DSM 19850	Blautia	Blautia wexlerae	P3	1				3496	3497		3500	3062, 3506	3501																1479, 1483	1480	1481	1482
1133568.3	Brachyspira pilosicoli B2904	Brachyspira	Brachyspira pilosicoli	-1	0
1129895.3	Brevibacillus brevis FJAT-0809-GLX	Brevibacillus	Brevibacillus brevis	P1	1								1055										1429	2079	2078	1695	2080			2081
1176165.3	Brevibacterium massiliense 5401308	Brevibacterium	Brevibacterium ravenspurgense	-1	0
679192.3	Bulleidia extructa W1219	Bulleidia	Bulleidia extructa	-1	0
1834205.4	Burkholderiales bacterium YL45	-	-	-1	0
1203606.4	Butyricicoccus pullicaecorum 1.2	Butyricicoccus	Butyricicoccus pullicaecorum	-1	0								1172				611
1121129.3	Butyricimonas synergistica DSM 23225	Butyricimonas	Butyricimonas synergistica	P1	1																		58	2018	2017					59		60
511680.4	Butyrivibrio crossotus DSM 2876	Butyrivibrio	Butyrivibrio crossotus	-1	0																									85	82		84
1121262.4	Caloramator proteoclasticus DSM 10124	Caloramator	Caloramator proteoclasticus	-1	0
864566.3	Campylobacter coli JV20	Campylobacter	Campylobacter coli	-1	0
199.248	Campylobacter concisus strain ATCC 33237	Campylobacter	Campylobacter concisus	-1	0
197.5249	Campylobacter jejuni strain NCTC11351	Campylobacter	Campylobacter jejuni	-1	0
553218.4	Campylobacter rectus RM3267	Campylobacter	Campylobacter rectus	-1	0
883165.3	Campylobacter ureolyticus ACS-301-V-Sch3b	Campylobacter	Campylobacter ureolyticus	-1	0
521097.5	Capnocytophaga ochracea DSM 7271	Capnocytophaga	Capnocytophaga ochracea	-1	0
553177.6	Capnocytophaga sputigena ATCC 33612	Capnocytophaga	Capnocytophaga sputigena	-1	0
451640.5	Catenibacterium mitsuokai DSM 15897	Catenibacterium	Catenibacterium mitsuokai	-1	0								1412
1319815.3	Cetobacterium somerae ATCC BAA-474	Cetobacterium	Cetobacterium somerae	-1	0	166	165	164			163		998				1529
626937.8	Christensenella minuta strain DSM 22607	Christensenella	Christensenella minuta	-1	0																											613
1006003.3	Citrobacter freundii ATCC 8090 = MTCC 1658	Citrobacter	Citrobacter freundii	P13	1	2412, 4204	2411, 4203	2410, 4202			2409, 4201	2401	2405	2400	2395, 4258											1943	1942		1941									1940
290338.8	Citrobacter koseri ATCC BAA-895	Citrobacter	Citrobacter koseri	P3	1	681	680	679			678	670	674	669	3775
1118059.3	Clostridiales bacterium ph2	Kallipyga	Kallipyga massiliensis	-1	0																										1078
272562.8	Clostridium acetobutylicum ATCC 824	Clostridium	Clostridium acetobutylicum	-1	0
1128398.3	Clostridium acidurici 9a	Gottschalkia	Gottschalkia acidurici	-1	0								1271
518636.5	Clostridium asparagiforme DSM 15981	Lachnoclostridium	[Clostridium] asparagiforme	P2	1							1823	1828, 388, 4893				617		619	620	618									3995, 3998	3996
445973.7	Clostridium bartlettii DSM 16795	Intestinibacter	Intestinibacter bartlettii	-1	0								2695
290402.41	Clostridium beijerinckii NCIMB 8052	Clostridium	Clostridium beijerinckii	P23	1				4218	4217		2608, 3978, 4202, 4211	4204	4210		3480	2103, 3403, 3481, 3966, 4719	4718				4720
1233170.3	Clostridium bifermentans ATCC 19299	Paraclostridium	Paraclostridium bifermentans	P12	1								1345, 2103	1332			2342		2340	2339	2341		1026		1023		1025	1024		1027, 1028	1031						1022
411902.9	Clostridium bolteae ATCC BAA-613	Lachnoclostridium	[Clostridium] bolteae	P3	1				6029, 6045	6030		6036, 6041	5770, 6039	6042																2175, 2180	2177
508765.6	Clostridium botulinum B str. Eklund 17B	Clostridium	Clostridium botulinum	P23	1	2023	2022	2021	1763	1762	2020	1672, 2051	1399, 1668				1911	1910				1912
1316931.3	Clostridium butyricum DSM 10702	Clostridium	Clostridium butyricum	-1	0				3887	3886							145
1280692.3	Clostridium cadaveris AGR2141	Clostridium	Clostridium cadaveris	P23	1				183	182		171, 176	173, 2410, 846	170, 2421			2781		403	402	404
573061.5	Clostridium cellulovorans 743B	Clostridium	Clostridium cellulovorans	-1	0
717608.3	Clostridium cf. saccharolyticum K10	Lachnoclostridium	[Clostridium] saccharolyticum	P3	1				349	350		357, 362	360	363																194, 198	197	196	195
720554.3	Clostridium clariflavum DSM 19732	Ruminiclostridium	[Clostridium] clariflavum	-1	0																									1572	2018
999410.3	Clostridium clostridioforme CM201	Lachnoclostridium	[Clostridium] clostridioforme	P3	1				5446	5447		5453, 5458	5456	5459																766, 771	768
499175.4	Clostridium difficile ATCC 43255	Clostridioides	Clostridioides difficile	P2	1								1537, 2319				41		43	44	42
1121315.3	Clostridium glycolicum ATCC 14880	Terrisporobacter	Terrisporobacter glycolicus	P13	1				76	75		72	3456, 73	71									1119			1122		1121		1118	1115	1116					1123
566550.8	Clostridium hathewayi DSM 13479	Hungatella	Hungatella hathewayi	-1	0																									3981, 3985	3984	3983	3982
500633.7	Clostridium hiranonis DSM 13275	-	[Clostridium] hiranonis	P3	1				580	581		587, 594	592, 782	588
553973.6	Clostridium hylemonae DSM 15053	Lachnoclostridium	[Clostridium] hylemonae	-1	0								1001																	2468, 2472	2469	2470	2471
999413.4	Clostridium innocuum 2959	Erysipelatoclostridium	[Clostridium] innocuum	-1	0
428125.8	Clostridium leptum DSM 753	Ruminiclostridium	[Clostridium] leptum	-1	0								611																		2025	351
500632.7	Clostridium nexile DSM 1787	Tyzzerella	Tyzzerella nexilis	-1	0																									2757	2754	2755	2756
742738.3	Clostridium orbiscindens 1_3_50AFAA	Flavonifractor	Flavonifractor plautii	P13	1	1191	1192	1193			1194	1203	1198, 2177, 2734			311, 688	310, 583, 689						3728		3732		3729, 3730	3731		3727	3725						3722
1262449.3	Clostridium pasteurianum DSM 525	Clostridium	Clostridium pasteurianum	P2	1	709	710	711			712						1866, 2134	1865				1867
195103.9	Clostridium perfringens ATCC 13124	Clostridium	Clostridium perfringens	P2	1	1128	1129	1130			1131		867				80	81				79
445974.6	Clostridium ramosum DSM 1402	Erysipelatoclostridium	Erysipelatoclostridium ramosum	-1	0								1426
411468.9	Clostridium scindens ATCC 35704	Lachnoclostridium	[Clostridium] scindens	-1	0								3519																	1814, 1818	1817	1816	1815
1504.35	Clostridium septicum strain DSM 7534	Clostridium	Clostridium septicum	-1	0				100	99							1070
1292036.3	Clostridium sordellii ATCC 9714	Paeniclostridium	Paeniclostridium sordellii	P12	1												1098, 1099		1102	1103			2710		2706, 2707		2709	2708		2711, 2712
428126.7	Clostridium spiroforme DSM 1552	Erysipelatoclostridium	[Clostridium] spiroforme	-1	0								1461
471871.7	Clostridium sporogenes ATCC 15579	Clostridium	Clostridium sporogenes	P2	1								1502				1386		1387	1388	1393
411472.5	Clostridium symbiosum ATCC 14940	Lachnoclostridium	[Clostridium] symbiosum	P2	1								3307			469	470	468	4351, 437	4352, 438		471								677, 682	681	680	678
1121342.3	Clostridium tyrobutyricum DSM 2637 = ATCC 25755	Clostridium	Clostridium tyrobutyricum	P2	1												2654, 2806, 2950	2024	2808	2809	2807	2951
411903.6	Collinsella aerofaciens ATCC 25986	Collinsella	Collinsella aerofaciens	-1	0
521003.7	Collinsella intestinalis DSM 13280	Collinsella	Collinsella intestinalis	-1	0
445975.6	Collinsella stercoris DSM 13279	Collinsella	Collinsella stercoris	-1	0
742742.3	Collinsella tanakaei YIT 12063	Collinsella	Collinsella tanakaei	-1	0
399795.3	Comamonas testosteroni KF-1	Comamonas	Comamonas testosteroni	-1	0																		2290			2285	2286	2285
1297794.4	Coprobacillus cateniformis JCM 10604	Coprobacillus	Coprobacillus cateniformis	-1	0								162
470146.3	Coprococcus comes ATCC 27758	Coprococcus	Coprococcus comes	-1	0																									325	322	323	324
411474.6	Coprococcus eutactus ATCC 27759	Coprococcus	Coprococcus eutactus	-1	0																									1197, 1201	1198	1199
548476.3	Corynebacterium aurimucosum ATCC 700975	Corynebacterium	Corynebacterium aurimucosum	-1	0																																	2179
272564.6	Desulfitobacterium hafniense DCB-2	Desulfitobacterium	Desulfitobacterium hafniense	-1	0								372, 4193, 5081												2797		2796	2798
1121444.3	Desulfovibrio desulfuricans subsp. aestuarii DSM 17919 = ATCC 29578	Halodesulfovibrio	Halodesulfovibrio aestuarii	-1	0								897
411464.8	Desulfovibrio piger ATCC 29098	Desulfovibrio	Desulfovibrio piger	-1	0
592028.3	Dialister invisus DSM 15470	Dialister	Dialister invisus	P1	1																		981	974	976, 984	975	973, 982	983		980	1713, 1716, 1720	978	1712, 1715, 1719, 979				985
411461.4	Dorea formicigenerans ATCC 27755	Dorea	Dorea formicigenerans	-1	0								219																	1491	1488	1489	1490
411462.6	Dorea longicatena DSM 13814	Dorea	Dorea longicatena	-1	0																									1189	1192	1191	1190
471854.5	Dyadobacter fermentans DSM 18053	Dyadobacter	Dyadobacter fermentans	-1	0																			5956	5956
500638.3	Edwardsiella tarda ATCC 23685	Edwardsiella	Edwardsiella tarda	-1	0										884
479437.5	Eggerthella lenta DSM 2243	Eggerthella	Eggerthella lenta	-1	0
999415.3	Eggerthia catenaformis OT 569 = DSM 20559	Eggerthia	Eggerthia catenaformis	-1	0
1432052.14	Eisenbergiella tayi strain DSM 26961	Eisenbergiella	Eisenbergiella tayi	P3	1				2435	2436		2442	2448	2443																5113	5110	5111	5112
1028307.3	Enterobacter aerogenes KCTC 2190	Klebsiella	Klebsiella aerogenes	-1	0								2003, 2004		4389
716541.4	Enterobacter cloacae subsp. cloacae ATCC 13047	Enterobacter	Enterobacter cloacae complex	-1	0										4661
1140002.4	Enterococcus avium ATCC 14025	Enterococcus	Enterococcus avium	P3	1	3311	3310	3309			3308	3299	1139, 3304, 3841
888066.3	Enterococcus casseliflavus ATCC 12755	Enterococcus	Enterococcus casseliflavus	-1	0
1140001.4	Enterococcus durans ATCC 6056	Enterococcus	Enterococcus durans	-1	0
525271.4	Enterococcus faecalis ATCC 29200	Enterococcus	Enterococcus faecalis	-1	0								401																		2524
1158600.4	Enterococcus faecium ATCC 8459	Enterococcus	Enterococcus faecium	-1	0
768486.3	Enterococcus hirae ATCC 9790	Enterococcus	Enterococcus hirae	-1	0
1158602.4	Enterococcus raffinosus ATCC 49464	Enterococcus	Enterococcus raffinosus	P3	1	105	104	103			102	93	2012, 98
1139996.4	Enterococcus saccharolyticus ATCC 43076	Enterococcus	Enterococcus saccharolyticus	-1	0
511145.12	Escherichia coli str. K-12 substr. MG1655	Escherichia	Escherichia coli	P1	1										3209											3012	3013		3014									3015
585054.5	Escherichia fergusonii ATCC 35469	Escherichia	Escherichia fergusonii	P3	1	1945	1946	1947			1948	1956	1934, 1935, 1952	1957	1962																3024
1115512.3	Escherichia hermannii NBRC 105704	Atlantibacter	Atlantibacter hermannii	P3	1				3825	3824		3828	3836		2107, 3831
518637.5	Eubacterium biforme DSM 3989	Holdemanella	Holdemanella biformis	-1	0
1321814.3	Eubacterium brachy ATCC 33089	-	[Eubacterium] brachy	-1	0												331		330	329
1408436.3	Eubacterium cellulosolvens LD2006	Eubacterium	[Eubacterium] cellulosolvens	-1	0																									1804	1807
290054.4	Eubacterium coprostanoligenes strain ATCC 51222	Eubacterium	Eubacterium coprostanoligenes	-1	0								220																	66	195	65
717960.3	Eubacterium cylindroides T2-87	Faecalitalea	Faecalitalea cylindroides	-1	0
428127.7	Eubacterium dolichum DSM 3991	Absiella	Absiella dolichum	-1	0
411469.3	Eubacterium hallii DSM 3353	Eubacterium	[Eubacterium] hallii	P3	1	462	461	460	2611, 73	74	1916, 459	452																		2320, 2324	2321	2322	2323
903814.3	Eubacterium limosum KIST612	Eubacterium	Eubacterium limosum	P23	1	3790	3789	3788			3787	3779	2727, 3784	2537			3502	3501				3503
1256908.3	Eubacterium ramulus ATCC 29099	Eubacterium	Eubacterium ramulus	-1	0																									1031	1028	1029	1030
515619.6	Eubacterium rectale ATCC 33656	-	[Eubacterium] rectale	-1	0																									1378, 1382	1381	1380	1379
887325.3	Eubacterium saburreum DSM 3986	Lachnoanaerobaculum	Lachnoanaerobaculum saburreum	P2	1											2539	2540		349	348										2020, 2024	2021	2022	2023
592031.3	Eubacterium saphenum ATCC 49989	-	[Eubacterium] saphenum	-1	0
428128.7	Eubacterium siraeum DSM 15702	Ruminiclostridium	[Eubacterium] siraeum	-1	0								1874																			2268	1129
411463.4	Eubacterium ventriosum ATCC 27560	Eubacterium	Eubacterium ventriosum	-1	0																									1871	1872
864565.3	Eubacterium yurii subsp. margaretiae ATCC 43715	Peptoanaerobacter	[Eubacterium] yurii	P3	1				157	158		164, 170	169	165						1673
718252.3	Faecalibacterium prausnitzii L2-6	Faecalibacterium	Faecalibacterium prausnitzii	-1	0																									1812		1813
546269.3	Filifactor alocis ATCC 35896	Filifactor	Filifactor alocis	-1	0																											1579
525282.5	Finegoldia magna ATCC 53516	Finegoldia	Finegoldia magna	-1	0
411475.3	Flavonifractor plautii ATCC 29863	Flavonifractor	Flavonifractor plautii	P13	1	3099	3100	3101			3102	3111	2743, 2946, 3106			173, 579	1542, 171, 580						1479		1482		1480	1481		1478	1476						1473
469615.3	Fusobacterium gonidiaformans ATCC 25563	Fusobacterium	Fusobacterium gonidiaformans	-1	0																										1159
469616.3	Fusobacterium mortiferum ATCC 9817	Fusobacterium	Fusobacterium mortiferum	-1	0												907
525283.3	Fusobacterium nucleatum subsp. nucleatum ATCC 23726	Fusobacterium	Fusobacterium nucleatum	-1	0
469618.3	Fusobacterium varium ATCC 27725	Fusobacterium	Fusobacterium varium	P3	1	2041	2042	2043			2044	2052	1640, 2048				450
546270.5	Gemella haemolysans ATCC 10379	Gemella	Gemella haemolysans	-1	0
562983.3	Gemella sanguinis M325	Gemella	Gemella sanguinis	-1	0
745368.3	Gemmiger formicilis strain ATCC 27749	Gemmiger	Gemmiger formicilis	-1	0																									1128		1129
1077975.4	Gordonia rubripertincta NBRC 101908	Gordonia	Gordonia rubripertincta	-1	0																		3745	692	691													4484
638301.3	Granulicatella adiacens ATCC 49175	Granulicatella	Granulicatella adiacens	-1	0
888728.3	Haemophilus aegyptius ATCC 11116	Haemophilus	Haemophilus aegyptius	-1	0
727.305	Haemophilus influenzae Hi375	Haemophilus	Haemophilus influenzae	-1	0
888828.3	Haemophilus parainfluenzae ATCC 33392	Haemophilus	Haemophilus parainfluenzae	-1	0
1002364.3	Hafnia alvei ATCC 51873	Hafnia	Hafnia alvei	P13	1	711	712	713			714	722	718	723	1296											1409	1408		1407									1406
613026.4	Helicobacter bilis ATCC 43879	Helicobacter	Helicobacter bilis	-1	0
537970.5	Helicobacter canadensis MIT 98-5491	Helicobacter	Helicobacter canadensis	-1	0
85963.7	Helicobacter pylori J99	Helicobacter	Helicobacter pylori	-1	0
545696.5	Holdemania filiformis DSM 12042	Holdemania	Holdemania filiformis	-1	0								2259
1297617.3	Intestinimonas butyriciproducens ER1	Intestinimonas	Intestinimonas butyriciproducens	P123	1	311	312	313			314	323	1277, 318			3524	3523		2845	1339	1338		2937	2943	2942		2512			2938	2941
629741.3	Kingella oralis ATCC 51147	Kingella	Kingella oralis	-1	0
1006551.4	Klebsiella oxytoca KCTC 1686	Klebsiella	Klebsiella michiganensis	P13	1	294	295	296			297	305	1959, 1960, 301	306												507	508		509									510
507522.6	Klebsiella pneumoniae 342	Klebsiella	Klebsiella pneumoniae	P3	1	1108, 838	1107, 839	1106, 840			1105, 841	1097	1101, 4795, 4796	1096	2136
1236550.3	Kocuria palustris PEL	Kocuria	Kocuria palustris	-1	0
478801.5	Kytococcus sedentarius DSM 20547	Kytococcus	Kytococcus sedentarius	-1	0																		887	2140	2141		2139
1122142.3	Lachnobacterium bovis DSM 14045	Lachnobacterium	Lachnobacterium bovis	-1	0																											1668
28052.3	Lachnospira pectinoschiza	Lachnospira	Lachnospira pectinoschiza	-1	0																									916	919	918	917
525306.3	Lactobacillus acidophilus ATCC 4796	Lactobacillus	Lactobacillus acidophilus	-1	0
585524.3	Lactobacillus amylolyticus DSM 11664	Lactobacillus	Lactobacillus amylolyticus	-1	0
525309.3	Lactobacillus antri DSM 16041	Lactobacillus	Lactobacillus antri	-1	0
387344.15	Lactobacillus brevis ATCC 367	Lactobacillus	Lactobacillus brevis	P3	1	1529	1528	1527			1526	1517	1522
525318.3	Lactobacillus buchneri ATCC 11577	Lactobacillus	Lactobacillus buchneri	-1	0
321967.11	Lactobacillus casei ATCC 334	Lactobacillus	Lactobacillus paracasei	-1	0
999378.3	Lactobacillus casei LC2W	Lactobacillus	Lactobacillus casei	-1	0
575595.3	Lactobacillus crispatus 125-2-CHN	Lactobacillus	Lactobacillus crispatus	-1	0
390333.7	Lactobacillus delbrueckii subsp. bulgaricus ATCC 11842	Lactobacillus	Lactobacillus delbrueckii	-1	0
525325.3	Lactobacillus fermentum ATCC 14931	Lactobacillus	Lactobacillus fermentum	-1	0
324831.13	Lactobacillus gasseri ATCC 33323	Lactobacillus	Lactobacillus gasseri	-1	0
1144300.3	Lactobacillus gastricus PS3	Lactobacillus	Lactobacillus gastricus	-1	0
888801.3	Lactobacillus iners ATCC 55195	Lactobacillus	Lactobacillus iners	-1	0
440497.10	Lactobacillus jensenii 1153	Lactobacillus	Lactobacillus jensenii	-1	0
525330.3	Lactobacillus johnsonii ATCC 33200	Lactobacillus	Lactobacillus johnsonii	-1	0
1130798.3	Lactobacillus mucosae LM1	Lactobacillus	Lactobacillus mucosae	-1	0
1136177.4	Lactobacillus pentosus KCA1	Lactobacillus	Lactobacillus pentosus	-1	0
525338.3	Lactobacillus plantarum subsp. plantarum ATCC 14917	Lactobacillus	Lactobacillus plantarum	-1	0
557436.4	Lactobacillus reuteri DSM 20016	Lactobacillus	Lactobacillus reuteri	P3	1	1765	1764	1763			1762	1753	1758
1002365.5	Lactobacillus rhamnosus ATCC 21052	Lactobacillus	Lactobacillus rhamnosus	-1	0
525362.3	Lactobacillus ruminis ATCC 25644	Lactobacillus	Lactobacillus ruminis	-1	0
314315.12	Lactobacillus sakei subsp. sakei 23K	Lactobacillus	Lactobacillus sakei	-1	0
362948.14	Lactobacillus salivarius UCC118	Lactobacillus	Lactobacillus salivarius	-1	0
420889.6	Lactococcus garvieae ATCC 49156	Lactococcus	Lactococcus garvieae	-1	0
1104322.3	Lactococcus lactis subsp. cremoris A76	Lactococcus	Lactococcus lactis	-1	0
596323.3	Leptotrichia goodfellowii F0264	Leptotrichia	Leptotrichia goodfellowii	-1	0																										1629
586220.3	Leuconostoc mesenteroides subsp. cremoris ATCC 19254	Leuconostoc	Leuconostoc mesenteroides	-1	0
882095.3	Listeria monocytogenes ATCC 19117	Listeria	Listeria monocytogenes	P3	1	1165	1166	1167			1168	1177	1172, 1194	1178			2199
1122184.3	Lutispora thermophila DSM 19022	Lutispora	Lutispora thermophila	P1	1								1060										1205			1202	1204	1203		1206	1209
1231627.3	Lysinibacillus fusiformis ZB2	Lysinibacillus	Lysinibacillus fusiformis	P1	1								1396, 1401, 632, 633										177			172, 173, 2882	174			178
657316.3	Megamonas hypermegale ART12/1	Megamonas	Megamonas hypermegale	P1	1																		514, 515	1231, 1232	1233	518	1230, 516	517		513							519
907.4	Megasphaera elsdenii	Megasphaera	Megasphaera elsdenii	P2	1												1106, 826	1111, 823	1109	1110	1108	824								1416		1418	1417
465515.4	Micrococcus luteus NCTC 2665	Micrococcus	Micrococcus luteus	-1	0
548479.6	Mobiluncus curtisii ATCC 43063	Mobiluncus	Mobiluncus curtisii	-1	0
871571.3	Mobiluncus mulieris ATCC 35239	Mobiluncus	Mobiluncus mulieris	-1	0
1239989.3	Morganella morganii SC01	Morganella	Morganella morganii	-1	0
1112856.4	Mycoplasma pneumoniae 309	Mycoplasma	Mycoplasma pneumoniae	-1	0
883150.3	Myroides odoratimimus CCUG 10230	Myroides	Myroides odoratimimus	-1	0																					2208, 435, 436
490.6	Neisseria sicca strain FDAARGOS_260	Neisseria	Neisseria sicca	-1	0
546268.4	Neisseria subflava NJ9703	Neisseria	Neisseria subflava	-1	0
1122603.3	Nevskia ramosa DSM 11499	Nevskia	Nevskia ramosa	-1	0																					237
439375.7	Ochrobactrum anthropi ATCC 49188	Ochrobactrum	Ochrobactrum anthropi	-1	0																		2539			2104		2104
742817.3	Odoribacter laneus YIT 12061	Odoribacter	Odoribacter laneus	P1	1																		1597	2772	2773					1598	2300
1007096.3	Oscillibacter ruminantium GH1	Oscillibacter	Oscillibacter ruminantium	-1	0														1179	1178
556268.6	Oxalobacter formigenes HOxBLS	Oxalobacter	Oxalobacter formigenes	-1	0
1261128.3	Pantoea agglomerans 299R	Pantoea	Pantoea agglomerans	-1	0
435591.13	Parabacteroides distasonis ATCC 8503	Parabacteroides	Parabacteroides distasonis	P1	1																		157	2284	2285					156	153	154						2404
927665.4	Parabacteroides goldsteinii DSM 19448 = WAL 12034	Parabacteroides	Parabacteroides goldsteinii	P1	1																		2855	5104	5103		801			2854	2851, 3849	2852						2618
1122931.3	Parabacteroides gordonii DSM 23371	Parabacteroides	Parabacteroides gordonii	P1	1																		3371	2428	2427		719			3372	3375, 360	3374						3921
999419.3	Parabacteroides johnsonii CL02T12C29	Parabacteroides	Parabacteroides johnsonii	P1	1																		1144	2520	2519					1143	1140	1141						2253
411477.4	Parabacteroides merdae ATCC 43184	Parabacteroides	Parabacteroides merdae	P1	1																		2892	3478	3479					2891	2888	2889						612
332977.5	Parapedobacter koreensis Jip14	Parapedobacter	Parapedobacter koreensis	-1	0
762968.3	Paraprevotella clara YIT 11840	Paraprevotella	Paraprevotella clara	P1	1																		1385	989	988					1386, 983	980	1388
762982.3	Paraprevotella xylaniphila YIT 11841	Paraprevotella	Paraprevotella xylaniphila	P1	1																		991	2904	2905					2910, 992	2913
762966.3	Parasutterella excrementihominis YIT 11859	Parasutterella	Parasutterella excrementihominis	-1	0
411465.10	Parvimonas micra ATCC 33270	Parvimonas	Parvimonas micra	-1	0
1306952.3	Pediococcus acidilactici D3	Pediococcus	Pediococcus acidilactici	-1	0
278197.12	Pediococcus pentosaceus ATCC 25745	Pediococcus	Pediococcus pentosaceus	-1	0
2741.3	Peptococcus niger strain DSM 20475	Peptococcus	Peptococcus niger	-1	0					23
573058.3	Peptoniphilus asaccharolyticus DSM 20463 strain DSM 20463	Peptoniphilus	Peptoniphilus asaccharolyticus	P3	1				2225	2226		2232, 2240	2238
908338.3	Peptoniphilus harei ACS-146-V-Sch2b	Peptoniphilus	Peptoniphilus harei	P3	1				1480	1479		1465, 1473	1467																		1202
997350.3	Peptoniphilus indolicus ATCC 29427	Peptoniphilus	Peptoniphilus indolicus	P23	1				359	360		366, 374	372				350	351	345	344	346
1122949.3	Peptoniphilus lacrimalis DSM 7455	Peptoniphilus	Peptoniphilus lacrimalis	-1	0																										1152
1122950.3	Peptostreptococcus anaerobius DSM 2949	Peptostreptococcus	Peptostreptococcus anaerobius	P2	1												1892, 331		1891	1890	519
1122957.3	Phascolarctobacterium faecium DSM 14760	Phascolarctobacterium	Phascolarctobacterium faecium	P1	1																		1384	1421	1387, 1422, 1819		1385, 1420	1386, 1707		2271	1169, 2265, 787	2264, 788	2263, 789				1388, 1818
626939.3	Phascolarctobacterium sp. YIT 12067	Phascolarctobacterium	Phascolarctobacterium succinatutens	P1	1								195										1176	391	392	1173	1175, 390	1174		1177	1255	1179	1178				1172
879243.3	Porphyromonas asaccharolytica DSM 20707	Porphyromonas	Porphyromonas asaccharolytica	P1	1																		121	503	502					122	862	124						612
431947.6	Porphyromonas gingivalis ATCC 33277	Porphyromonas	Porphyromonas gingivalis	P1	1																		494	456	457					495	499	498						1321
1122978.3	Prevotella albensis DSM 11370	Prevotella	Prevotella albensis	-1	0																									831		833
868129.3	Prevotella bivia DSM 20514	Prevotella	Prevotella bivia	-1	0																									382		384
873513.3	Prevotella buccae ATCC 33574	Prevotella	Prevotella buccae	-1	0																									2090		2092
537011.5	Prevotella copri DSM 18205	Prevotella	Prevotella copri	-1	0																									2395, 3269	2105, 2903	2106, 2397, 2904, 3271
1122981.3	Prevotella corporis DSM 18810	Prevotella	Prevotella corporis	-1	0																									2302		2300
1122982.4	Prevotella denticola DSM 20614	Prevotella	Prevotella denticola	-1	0																									1519		1517
1235811.5	Prevotella disiens JCM 6334 = ATCC 29426	Prevotella	Prevotella disiens	-1	0																									2369		2367
28131.5	Prevotella intermedia strain ATCC 49046	Prevotella	Prevotella intermedia	-1	0																									2205		2203
553174.6	Prevotella melaninogenica ATCC 25845	Prevotella	Prevotella melaninogenica	-1	0																									1864		1866
1122988.3	Prevotella nanceiensis DSM 19126	Prevotella	Prevotella nanceiensis	-1	0																									44		46
997352.4	Prevotella nigrescens ATCC 33563	Prevotella	Prevotella nigrescens	-1	0																									704		706
702438.4	Prevotella oulorum F0390	Prevotella	Prevotella oulorum	-1	0																									749		747
997353.4	Prevotella pallens ATCC 700821	Prevotella	Prevotella pallens	-1	0																									1127		1125
888832.3	Prevotella salivae DSM 15606	Prevotella	Prevotella salivae	-1	0																									2315		2317
1002367.3	Prevotella stercorea DSM 18206	Prevotella	Prevotella stercorea	-1	0																									153		151
626522.3	Prevotella tannerae ATCC 51259	Alloprevotella	Alloprevotella tannerae	-1	0																									1860, 2494		1862, 2492
1122992.6	Prevotella timonensis 4401737 = DSM 22865 = JCM 15640	Prevotella	Prevotella timonensis	-1	0																									1121		1123
1122993.3	Prevotella veroralis DSM 19559	Prevotella	Prevotella veroralis	-1	0																									2281		2279
1091045.3	Propionibacterium acnes ATCC 11828	Cutibacterium	Cutibacterium acnes	P1	1							317											1869	2361	2362										584	583		631
525369.4	Proteus mirabilis ATCC 29906	Proteus	Proteus mirabilis	-1	0								2552, 2553
585.9	Proteus vulgaris strain ATCC 49132	Proteus	Proteus vulgaris	-1	0								1349, 1350						1272	1271	1273
521000.6	Providencia rettgeri DSM 1131	Providencia	Providencia rettgeri	-1	0								3984, 3985
471874.6	Providencia stuartii ATCC 25827	Providencia	Providencia stuartii	-1	0
1123011.4	Pseudobutyrivibrio ruminis DSM 9787	Pseudobutyrivibrio	Pseudobutyrivibrio ruminis	-1	0																									521, 525	522	523	524
411467.62	Pseudoflavonifractor capillosus ATCC 29799	Pseudoflavonifractor	Pseudoflavonifractor capillosus	-1	0
381754.6	Pseudomonas aeruginosa PA7	Pseudomonas	Pseudomonas aeruginosa	-1	0
1221522.3	Pseudomonas fluorescens NCIMB 11764	Pseudomonas	Pseudomonas fluorescens	-1	0																					2220
32042.3	Pseudomonas stutzeri ATCC 14405 = CCUG 16156	Pseudomonas	Pseudomonas stutzeri	-1	0
352165.3	Pyramidobacter piscolens W5455	Pyramidobacter	Pyramidobacter piscolens	P1	1											275							2403	156	155		157			1252	1325
234621.6	Rhodococcus erythropolis PR4	Rhodococcus	Rhodococcus erythropolis	-1	0																		4428	3592	3591													6172
585394.18	Roseburia hominis A2-183	Roseburia	Roseburia hominis	-1	0																									1695, 1699	1696	1697	1698
536231.5	Roseburia intestinalis L1-82	Roseburia	Roseburia intestinalis	-1	0																									2628		2630	2631
622312.4	Roseburia inulinivorans DSM 16841	Roseburia	Roseburia inulinivorans	P3	1				1545	1546		1534	1540	1535																442, 446	445	444	443
762948.4	Rothia dentocariosa ATCC 17931	Rothia	Rothia dentocariosa	-1	0
553201.3	Rothia mucilaginosa ATCC 25296	Rothia	Rothia mucilaginosa	-1	0
1089547.3	Rudanella lutea DSM 19387	Rudanella	Rudanella lutea	-1	0																					4561, 4564, 4582
246199.4	Ruminococcus albus 8	Ruminococcus	Ruminococcus albus	-1	0
657321.5	Ruminococcus bromii L2-63	Ruminococcus	Ruminococcus bromii	-1	0								767																	2010	826	2011
1123075.3	Ruminococcus gauvreauii DSM 19829	Ruminococcus	Ruminococcus gauvreauii	-1	0								2349				1134													1553	1550		1552
411470.6	Ruminococcus gnavus ATCC 29149	Blautia	[Ruminococcus] gnavus	P3	1	1030	1029	1028	879	880, 881	1027	884	890	885, 895																273, 277	276	275	274
411459.7	Ruminococcus obeum ATCC 29174	Blautia	Blautia obeum	P3	1	3079	3078	3077	3094	3093	3076	3091	3085	3080, 3090																1490	1493	1492	1491
213810.4	Ruminococcus sp. 18P13	Ruminococcus	Ruminococcus champanellensis	-1	0								1579
411460.6	Ruminococcus torques ATCC 27756	Blautia	[Ruminococcus] torques	-1	0																									115, 119	118	117	116
718274.8	Salmonella enterica subsp. enterica serovar Typhimurium str. T000240	Salmonella	Salmonella enterica	P3	1	2134	2135	2136			2137	2145	2141	2146	3439
641146.3	Scardovia inopinata F0304	Scardovia	Scardovia inopinata	-1	0
1123242.3	Schlesneria paludicola DSM 18645	Schlesneria	Schlesneria paludicola	-1	0																					4739
546271.3	Selenomonas sputigena ATCC 35185	Selenomonas	Selenomonas sputigena	P1	1																		1880	1344	1343	1883	1345, 1881	1882		1879	263	1877	262				1884
47917.12	Serratia fonticola strain GS2	Serratia	Serratia fonticola	-1	0								1306, 1307
1123253.3	Silanimonas lenta DSM 16282	Silanimonas	Silanimonas lenta	-1	0																					1716
742818.3	Slackia piriformis YIT 12062	Slackia	Slackia piriformis	-1	0
504472.7	Spirosoma linguale DSM 74	Spirosoma	Spirosoma linguale	-1	0																			6609	6610	2256
762962.3	Staphylococcus aureus subsp. aureus ATCC 51811	Staphylococcus	Staphylococcus aureus	-1	0
904334.4	Staphylococcus capitis VCU116	Staphylococcus	Staphylococcus capitis	-1	0
176280.1	Staphylococcus epidermidis ATCC 12228	Staphylococcus	Staphylococcus epidermidis	-1	0
629742.3	Staphylococcus hominis SK119	Staphylococcus	Staphylococcus hominis	-1	0
1141106.7	Staphylococcus intermedius NCTC 11048	Staphylococcus	Staphylococcus intermedius	-1	0
883164.3	Staphylococcus lugdunensis ACS-027-V-Sch2	Staphylococcus	Staphylococcus lugdunensis	-1	0
883166.5	Staphylococcus simulans ACS-120-V-Sch1	Staphylococcus	Staphylococcus simulans	-1	0
1262650.3	Staphylococcus xylosus NJ	Staphylococcus	Staphylococcus xylosus	-1	0
1105272.3	Streptococcus agalactiae LMG 15081	Streptococcus	Streptococcus agalactiae	-1	0
1328.82	Streptococcus anginosus strain NCTC10713	Streptococcus	Streptococcus anginosus	-1	0
1035184.3	Streptococcus constellatus subsp. pharyngis SK1060	Streptococcus	Streptococcus constellatus	-1	0
663952.3	Streptococcus dysgalactiae subsp. dysgalactiae ATCC 27957	Streptococcus	Streptococcus dysgalactiae	-1	0																										1001
981539.3	Streptococcus gallolyticus subsp. gallolyticus ATCC 43143	Streptococcus	Streptococcus gallolyticus	-1	0
889204.3	Streptococcus infantis ATCC 700779	Streptococcus	Streptococcus infantis	-1	0
1316583.3	Streptococcus intermedius ATCC 27335	Streptococcus	Streptococcus intermedius	-1	0
864567.3	Streptococcus mitis ATCC 6249	Streptococcus	Streptococcus mitis	-1	0
1257041.3	Streptococcus mutans ATCC 25175	Streptococcus	Streptococcus mutans	-1	0
888048.3	Streptococcus parasanguinis ATCC 903	Streptococcus	Streptococcus parasanguinis	-1	0								223
981540.3	Streptococcus pasteurianus ATCC 43144	Streptococcus	Streptococcus pasteurianus	-1	0
561276.4	Streptococcus pneumoniae ATCC 700669	Streptococcus	Streptococcus pneumoniae	-1	0
160490.1	Streptococcus pyogenes M1 GAS	Streptococcus	Streptococcus pyogenes	-1	0																										900
347253.5	Streptococcus salivarius JIM8777	Streptococcus	Streptococcus salivarius	-1	0
997356.4	Streptococcus sanguinis ATCC 29667	Streptococcus	Streptococcus sanguinis	-1	0								1271
299768.6	Streptococcus thermophilus CNRZ1066	Streptococcus	Streptococcus thermophilus	-1	0
889206.3	Streptococcus vestibularis ATCC 49124	Streptococcus	Streptococcus vestibularis	-1	0
411471.5	Subdoligranulum variabile DSM 15176	Subdoligranulum	Subdoligranulum variabile	-1	0																									4142, 969	10, 5902
762967.3	Sutterella parvirubra YIT 11816	Sutterella	Sutterella parvirubra	-1	0
742823.3	Sutterella wadsworthensis 2_1_59BFAA	Sutterella	Sutterella wadsworthensis	-1	0
457415.3	Synergistes sp. 3_1_syn1	Synergistes	-	P1	1				75	74			1448										1474	450	451	1472, 2471	449	1473, 2470		1475	1478
203275.8	Tannerella forsythia ATCC 43037	Tannerella	Tannerella forsythia	P1	1																		866	2351	2350		890			865	862	863						369
203267.6	Tropheryma whipplei str. Twist	Tropheryma	Tropheryma whipplei	-1	0
910310.3	Turicibacter sp. HGF1	Turicibacter	-	-1	0
95664.6	Ureaplasma urealyticum serovar 10	Ureaplasma	Ureaplasma urealyticum	-1	0
1123488.3	Varibaculum cambriense DSM 15806	Varibaculum	Varibaculum cambriense	-1	0
866776.4	Veillonella atypica ACS-049-V-Sch6	Veillonella	Veillonella atypica	P1	1																		1029	1367	1026, 1368		1028, 1366	1027		1030	1034	1033	1031	1032			1025
546273.3	Veillonella dispar ATCC 17748	Veillonella	Veillonella dispar	P13	1	775	776	777			778	793	790										1181	622	1178, 621		1180, 623	1179		1182	1186	1185	1183	1184			1177
686660.3	Veillonella parvula ATCC 17745	Veillonella	Veillonella parvula	P1	1																		1778	817	816	1781	1779, 818	1780		1777	1773	1774	1776	1775			1782
883156.3	Veillonella ratti ACS-216-V-Col6b	Veillonella	Veillonella seminalis	P13	1	588	589	590			591	600	595										254	296	295	257	255, 297	256		253	250	251					258
903510.3	Vibrio furnissii NCTC 11218	Vibrio	Vibrio furnissii	-1	0								305, 306
340101.3	Victivallis vadensis ATCC BAA-548	Victivallis	Victivallis vadensis	-1	0																										2128
911104.3	Weissella cibaria KACC 11862	Weissella	Weissella cibaria	-1	0												1254
1045854.4	Weissella koreensis KACC 15510	Weissella	Weissella koreensis	-1	0
630.33	Yersinia enterocolitica strain ATCC 9610	Yersinia	Yersinia enterocolitica	P13	1	902	901	900			899	891	895	889, 890	4163											1703	1704		1705									1706
1002368.3	Yokenella regensburgei ATCC 43003	Yokenella	Yokenella regensburgei	P1	1								4241, 4242		1552											1754	1753		1752									1751
Functional roles:
PduC	Propanediol dehydratase large subunit (EC 4.2.1.28)
PduD	Propanediol dehydratase medium subunit (EC 4.2.1.28)
PduE	Propanediol dehydratase small subunit (EC 4.2.1.28)
PduG	Propanediol dehydratase reactivation factor large subunit
PduC2	Predicted novel propanediol dehydratase, B12-independent (EC 4.2.1.-)
PduD2	Predicted novel propanediol dehydratase, B12-independent, activating enzyme
PduP	CoA-acylating propionaldehyde dehydrogenase
PduL	Phosphate propanoyltransferase (EC 2.3.1.222)
PduW	Propionate kinase (EC 2.7.2.15)
PduQ	Propanol dehydrogenase
PrpP	Propionate permease
Pct	Propionate CoA-transferase (EC 2.8.3.1)
Acr	Acryloyl-CoA reductase (EC 1.3.1.95)
LcdA	Lactoyl-CoA dehydratase, alpha subunit (EC 4.2.1.54)
LcdB	Lactoyl-CoA dehydratase, beta subunit (EC 4.2.1.54)
LcdC	Lactoyl-CoA dehydratase, gamma subunit (EC 4.2.1.54)
LcdX	Lactoyl-CoA dehydratase, predicted (EC 4.2.1.54)
Mce	Methylmalonyl-CoA epimerase (EC 5.1.99.1)
MutB	Methylmalonyl-CoA mutase large subunit, MutB (EC 5.4.99.2)
MutA	Methylmalonyl-CoA mutase small subunit, MutA (EC 5.4.99.2)
MutA2	Methylmalonyl-CoA mutase (EC 5.4.99.2)
MutB2	YgfD: protein that forms a complex with the methylmalonyl-CoA mutase in a pathway for conversion of succinyl-CoA to propionyl-CoA
MutC	B12 binding domain of Methylmalonyl-CoA mutase (EC 5.4.99.2)
Mmd	Methylmalonyl-CoA decarboxylase (EC 4.1.1.41)
MmdA	Methylmalonyl-CoA decarboxylase, alpha chain (EC 4.1.1.41)
MmdB	Methylmalonyl-CoA decarboxylase, beta chain (EC 4.1.1.41)
MmdC	Biotin carboxyl carrier protein => methylmalonyl-CoA decarboxylase
MmdD	Methylmalonyl-CoA decarboxylase, delta-subunit (EC 4.1.1.41)
MmdE	Methylmalonyl-CoA decarboxylase, epsilon-subunit (EC 4.1.1.41)
MMCT_5S	Methylmalonyl-CoA:Pyruvate transcarboxylase 5S subunit (EC 2.1.3.1)
MMCT_12S	Methylmalonyl-CoA:Pyruvate transcarboxylase 12S subunit (EC 2.1.3.1)
AarC	Succinyl-CoA:acetate CoA-transferase (EC 2.8.3.18)
PST	Propionyl-CoA:succinate coenzyme A transferase (EC 2.8.3.-)

## Sheet: Acetate-Formate-Lactate
Table S1. D Metabolic subsystem of genes involved in Lactate, Acetate and Formate fermentation in reference human gut bacterial genomes.
Genome id	Genome name	Genus	Species	Variant	Acetate Binary Phenotype	Formate Binary Phenotype	L-Lactate Binary Phenotype	D-Lactate Binary Phenotype	AckA	Pta	LdhA-L	LdhA-D	PflA	PflB	FocA1	FocA2
730.11	[Haemophilus] ducreyi strain Cutaneous leg ulcer strain 2	Haemophilus	[Haemophilus] ducreyi	AF00	1	1	0	0	1239	1240			836	835		837
592010.4	Abiotrophia defectiva ATCC 49176	Abiotrophia	Abiotrophia defectiva	AFL0	1	1	1	0	115	114	231		968, 969	970		1228
85698.28	Achromobacter xylosoxidans strain NCTC10807	Achromobacter	Achromobacter xylosoxidans	A00D	1	0	0	1	5023	3167, 5022		3694
591001.3	Acidaminococcus fermentans DSM 20731	Acidaminococcus	Acidaminococcus fermentans	AFLD	1	1	1	1	1379	1453	1056, 724	993	811	810		54
575584.3	Acinetobacter baumannii ATCC 19606	Acinetobacter	Acinetobacter baumannii	A00D	1	0	0	1	1712	1713		3185
416269.6	Actinobacillus pleuropneumoniae L20	Actinobacillus	Actinobacillus pleuropneumoniae	AF0D	1	1	0	1	676	675		720	1084, 371	1083		1085, 1981
1655.52	Actinomyces naeslundii strain ATCC 27039	Actinomyces	Actinomyces naeslundii	AFL0	1	1	1	0	230	229	3378		2784, 2785, 2786	2788
411466.7	Actinomyces odontolyticus ATCC 17982	Actinomyces	Actinomyces odontolyticus	AFL0	1	1	1	0	216	215	1439		1654, 1655	1656
883077.3	Actinomyces turicensis ACS-279-V-Col4	Actinomyces	Actinomyces turicensis	AFL0	1	1	1	0	1237	1236	1516		1076, 1077	1078
1384484.3	Adlercreutzia equolifaciens DSM 19450	Adlercreutzia	Adlercreutzia equolifaciens	A000	1	0	0	0	1016, 259	1020						1638, 314
655812.3	Aerococcus viridans ATCC 11563	Aerococcus	Aerococcus viridans	AFL0	1	1	1	0	79	1677	1140, 848		866	867
380703.7	Aeromonas hydrophila subsp. hydrophila ATCC 7966	Aeromonas	Aeromonas hydrophila	AF0D	1	1	0	1	3573, 892	891		4105	1956, 2866	1704, 2865		1957
1408437.6	Agathobaculum desmolans ATCC 43058	Agathobaculum	Agathobaculum desmolans	AFL0	1	1	1	0	1157	1655	1576		1783	1782
985008.3	Aggregatibacter aphrophilus ATCC 33389	Aggregatibacter	Aggregatibacter aphrophilus	AF0D	1	1	0	1	1407	1406		977	1561	1559		1562
349741.6	Akkermansia muciniphila ATCC BAA-835	Akkermansia	Akkermansia muciniphila	0F0D	0	1	0	1		1618		876	1753	1752
1120974.3	Alistipes onderdonkii DSM 19147	Alistipes	Alistipes onderdonkii	0F0D	0	1	0	1	3283			1810	1603, 608, 867	1604, 607, 866		451
445970.5	Alistipes putredinis DSM 17216	Alistipes	Alistipes putredinis	000D	0	0	0	1	1182			728
561177.4	Anaerococcus hydrogenalis DSM 7454	Anaerococcus	Anaerococcus hydrogenalis	A0L0	1	0	1	0	185	1849	1631, 1632, 924				1629
525919.6	Anaerococcus prevotii DSM 20548	Anaerococcus	Anaerococcus prevotii	A0L0	1	0	1	0	768	1836	1177, 1346
525255.3	Anaerococcus tetradius ATCC 35098	Anaerococcus	Anaerococcus tetradius	AFL0	1	1	1	0	1753	676	116, 283		1261	1262
445971.6	Anaerofustis stercorihominis DSM 17244	Anaerofustis	Anaerofustis stercorihominis	0F0D	0	1	0	1	865			1538, 1539	531, 659	1000, 532, 663
411490.6	Anaerostipes caccae DSM 14662	Anaerostipes	Anaerostipes caccae	AFL0	1	1	1	0	427	428	1161, 3457		1612, 2875, 3137, 3421, 727	1613, 2876, 3136, 3419, 726
649757.3	Anaerostipes hadrus DSM 3319	Anaerostipes	Anaerostipes hadrus	AFL0	1	1	1	0	409	410	2284, 2449		18, 2347, 2511, 271	19, 2348, 2512, 270
445972.6	Anaerotruncus colihominis DSM 17241	Anaerotruncus	Anaerotruncus colihominis	00L0	0	0	1	0	351, 948		229, 2623				1786
997872.3	Atopobium minutum 10063974	Atopobium	Atopobium minutum	AF0D	1	1	0	1	1025	1023		1099, 1334	102, 103, 1116, 41	101, 1115, 42
692420.6	Bacillus amyloliquefaciens DSM7	Bacillus	Bacillus amyloliquefaciens	A0L0	1	0	1	0	2942	3868	299					2721
526980.3	Bacillus cereus ATCC 10876	Bacillus	Bacillus cereus	AFL0	1	1	1	0	5658	563	154, 2803, 5913		926	927	2221	4498, 4705
1196029.3	Bacillus endophyticus 2102	Bacillus	Bacillus endophyticus	A0L0	1	0	1	0	709	4274	3842
1367477.3	Bacillus infantis NRRL B-14911	Bacillus	Bacillus infantis	A0L0	1	0	1	0	3949	4803	437					5144
279010.13	Bacillus licheniformis ATCC 14580	Bacillus	Bacillus licheniformis	AFL0	1	1	1	0	3152	4070	352		2139	2138	4215	963
592022.4	Bacillus megaterium DSM319	Bacillus	Bacillus megaterium	A0L0	1	0	1	0	4779	5167	454					1070, 2403
526997.3	Bacillus mycoides DSM 2048	Bacillus	Bacillus mycoides	AFL0	1	1	1	0	4916	5637	2026, 5143, 5265		296	297	1793	4174
224308.1	Bacillus subtilis subsp. subtilis str. 168	Bacillus	Bacillus subtilis	A0L0	1	0	1	0	2950	3772	306				3811	2723
1118061.3	Bacteroidales bacterium ph8	Alistipes	Alistipes obesi	000D	0	0	0	1	2178			1358
411901.7	Bacteroides caccae ATCC 43185	Bacteroides	Bacteroides caccae	AF0D	1	1	0	1	3048	3047		2707	2015	2014
537012.5	Bacteroides cellulosilyticus DSM 14838	Bacteroides	Bacteroides cellulosilyticus	AF0D	1	1	0	1	1025	1026		2513	3544	2607, 3543
470145.6	Bacteroides coprocola DSM 17136	Bacteroides	Bacteroides coprocola	AF00	1	1	0	0	3297	3296			2409	2410
547042.5	Bacteroides coprophilus DSM 18228	Bacteroides	Bacteroides coprophilus	AF00	1	1	0	0	2105	2104			362	361
483217.6	Bacteroides dorei DSM 17855	Bacteroides	Bacteroides dorei	AF0D	1	1	0	1	1102	1103		3723	1701, 2983	1700, 2982
483216.6	Bacteroides eggerthii DSM 20697	Bacteroides	Bacteroides eggerthii	AF0D	1	1	0	1	3325	3324		1270	1235	1234
1077285.3	Bacteroides faecis MAJ27	Bacteroides	Bacteroides faecis	AF0D	1	1	0	1	1162	1161		4061	2376	2375, 3034
483215.6	Bacteroides finegoldii DSM 17565	Bacteroides	Bacteroides finegoldii	AF0D	1	1	0	1	2682	2683		4057	2370	2369
862962.3	Bacteroides fragilis 638R	Bacteroides	Bacteroides fragilis	AF0D	1	1	0	1	504	503		1486	1356, 4452	1355, 4451
384639.4	Bacteroides galacturonicus strain DSM 3978	Bacteroides	Bacteroides galacturonicus	AFLD	1	1	1	1	101	100	836	958	645	775
471870.8	Bacteroides intestinalis DSM 17393	Bacteroides	Bacteroides intestinalis	AF0D	1	1	0	1	627	628		3416	3489	3490
997884.3	Bacteroides nordii CL02T12C05	Bacteroides	Bacteroides nordii	AF0D	1	1	0	1	741	740		3362	1769	1767, 2165
411476.11	Bacteroides ovatus ATCC 8483	Bacteroides	Bacteroides ovatus	AF0D	1	1	0	1	2957	2956		3680	4769	3479, 4768
483218.5	Bacteroides pectinophilus ATCC 43243	-	[Bacteroides] pectinophilus	AFLD	1	1	1	1	1849	1848	835, 836	644	970	964		1904, 2455
484018.6	Bacteroides plebeius DSM 17135	Bacteroides	Bacteroides plebeius	AF00	1	1	0	0	205	204			1802	1801
1121099.3	Bacteroides propionicifaciens DSM 19291	Bacteroides	Bacteroides propionicifaciens	AF0D	1	1	0	1	1644	1645		738	593	594		2092
1235809.3	Bacteroides pyogenes JCM 6292	Bacteroides	Bacteroides pyogenes	0F0D	0	1	0	1				675	1898, 1899	1900, 483
667015.3	Bacteroides salanitronis DSM 18170	Bacteroides	Bacteroides salanitronis	AF00	1	1	0	0	1806	1805			243	244
1121101.3	Bacteroides salyersiae WAL 10018 = DSM 18765 = JCM 12988	Bacteroides	Bacteroides salyersiae	AF0D	1	1	0	1	1482	1483		2732	393	394
1236538.3	Bacteroides sartorii JCM 16497	Bacteroides	Bacteroides sartorii	AF0D	1	1	0	1	2288	2289, 2290		3128	1449, 272	1448, 271		5670
449673.7	Bacteroides stercoris ATCC 43183	Bacteroides	Bacteroides stercoris	AF0D	1	1	0	1	2324	2323		495	77	78
226186.1	Bacteroides thetaiotaomicron VPI-5482	Bacteroides	Bacteroides thetaiotaomicron	AF0D	1	1	0	1	3691	3690		1575	2954, 4736	1055, 2955, 4735
411479.10	Bacteroides uniformis ATCC 8492	Bacteroides	Bacteroides uniformis	AF0D	1	1	0	1	605	606		3864	3924	3925
[truncated: 327 more rows]
